# Supplementary material for: Unlocking Cowpea’s Defense Responses: Conserved Transcriptional Signatures in the Battle against CABMV and CPSMV Viruses
Source: MDPI journal article supplement (doi:10.3390/life13081747), 2023-08-15
Supplement: s1 [file s1]

Regarding the CTS-16UR and CTS-16DR datasets, MapMan tool analysis yielded limited information (Figure S1) in comparison to the CTS-1UR and CTS-1DR datasets. Specifically, for the CTS-16UR group, only a few members of the analyzed modules exhibited conserved up-regulation. This fragmented information prevented us from obtaining robust biological insights (Figure S1).

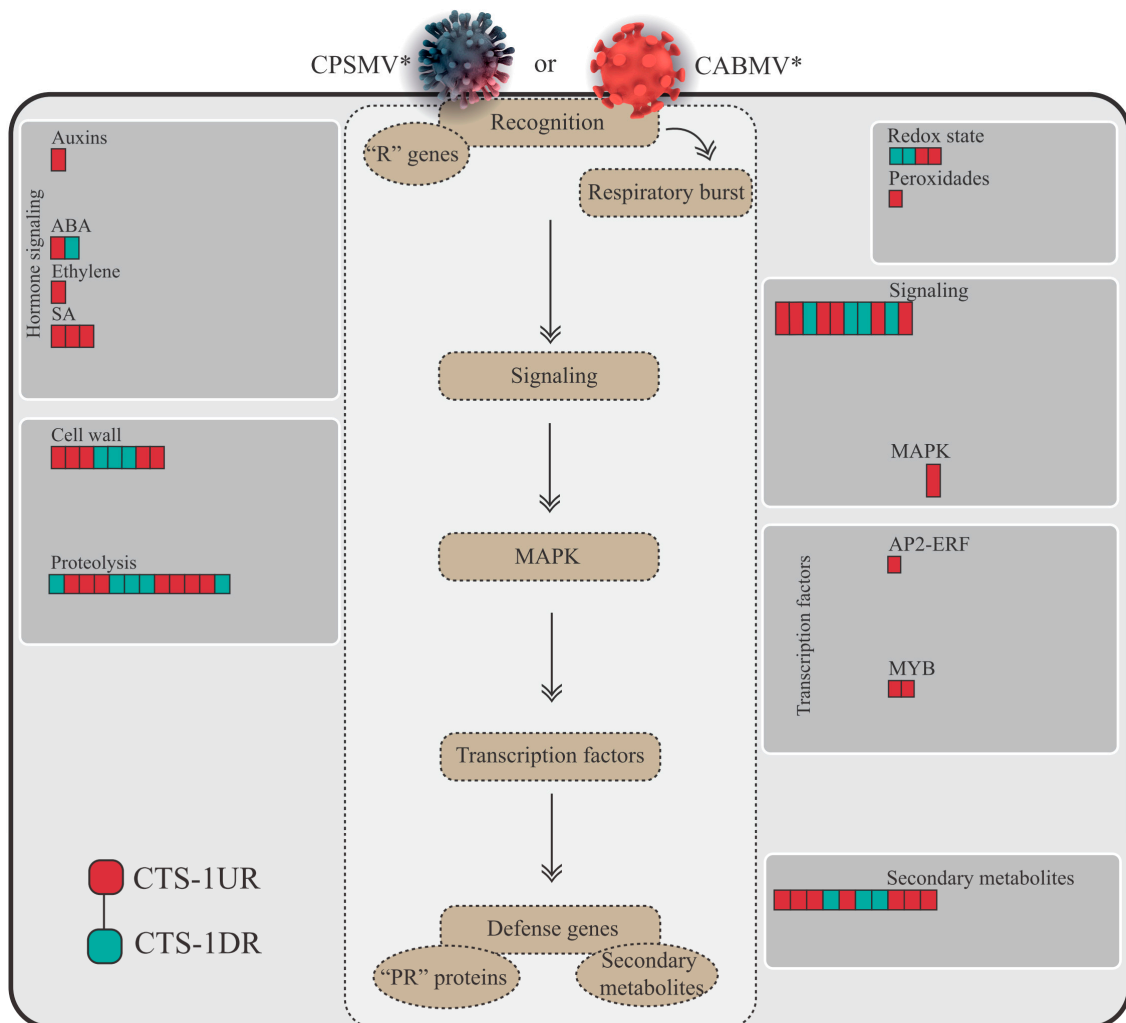

Figure S1. Transcripts from the CTS-16UR and CTS-16DR groups mapped onto the biotic stress response modules using the MapMan tool. Legend: \*for illustrative purposes only; CTS-16UR set (made up by up-regulated transcripts in response to CABMV and CPSMV mechanical inoculations, at 16 hpi treatments); CTS-16DR set (made up by down-regulated transcripts in response to CABMV and CPSMV mechanical inoculations, at 16 hpi treatments); hpi (hours post inoculation); colored squares/rectangles indicate different transcripts
