# Supplementary material for: Unlocking Cowpea’s Defense Responses: Conserved Transcriptional Signatures in the Battle against CABMV and CPSMV Viruses
Source: Life (Basel). 2023 Aug 15;13(8):1747. doi: 10.3390/life13081747 (PMC10455494; doi:10.3390/life13081747)
Supplement: Supplementary file 1 [file life-13-01747-s001.zip]

Archive with 7 entries (7 files):
- Figure S1.pdf
- ok_Appendix_S1.pdf
- ok_Table_S1.xls
- ok_Table_S2.xlsx
- ok_Table_S3.xlsx
- ok_Table_S4.xlsx
- ok_Table_S5.xlsx
