# Supplementary material for: Unlocking Cowpea’s Defense Responses: Conserved Transcriptional Signatures in the Battle against CABMV and CPSMV Viruses
Source: Life (Basel). 2023 Aug 15;13(8):1747. doi: 10.3390/life13081747 (PMC10455494; doi:10.3390/life13081747)
Supplement: Supplementary file 1 [file life-13-01747-s001.zip › ok_Table_S1.xls]

## Sheet: Descricao
Tabela Suplementar 2 - Anotação Funcional dos quatro conjuntos de CTSs (CTS-1UR, CTS-1DR, CTS-16UR, CTS-16DR) de feijão-caupi em resposta a injúria | inoculação por CABMV e CPSMV com base nos principais bancos de dados públicos
INDICE
I - Anotação CTS-1UR: Anotação funcional para o conjunto de CTSs induzidos após 1 hora de Mechanical Inoculation com os vírus CABMV ou CPSMV
II - Anotação CTS-1DR: Anotação funcional para o conjunto de CTSs reprimidos após 1 hora de mechanical inoculation com os vírus CABMV ou CPSMV
III - Anotação CTS-16UR: Anotação funcional para o conjunto de CTSs induzidos após 16 horas de mechanical inoculation com os vírus CABMV ou CPSMV
IV - Anotação CTS-16DR: Anotação funcional para o conjunto de CTSs reprimidos após 16 horas de mechanical inoculation com os vírus CABMV ou CPSMV

## Sheet: Annotation_CTS-1UR
ID_CTS-1UR	IDGenePhytozome	IDTranscriptPhytozome	GeneDefline	GeneLength	GeneChromosome	GENEstart	GENEend	Pfam	Panther	EC	KO	GO
Vung141216|c1_g2_i1	Vigun03g350200	Vigun03g350200.1	(1 of 1) PTHR19241:SF280 - ABC TRANSPORTER G FAMILY MEMBER 32	11177	Vu03	55098750	55109926	PF14510,PF08370,PF00005,PF01061	PTHR19241,PTHR19241:SF280	3.6.3.34	0	GO:0016887,GO:0005524,GO:0016020
Vung28165|c0_g1_i28	Vigun07g275400	Vigun07g275400.2	0	10405	Vu07	39080350	39090754	0	PTHR31115,PTHR31115:SF2	0	0	0
Vung86096|c0_g1_i10	Vigun10g189800	Vigun10g189800.1	(1 of 16) K01115 - phospholipase D1/2 (PLD1_2)	4839	Vu10	40482478	40487316	PF00168,PF00614,PF12357	PTHR18896,PTHR18896:SF11	3.1.4.4	K01115	GO:0005515,GO:0003824
Vung139422|c0_g2_i9	Vigun09g071900	Vigun09g071900.1	(1 of 4) PTHR19229 - ATP-BINDING CASSETTE TRANSPORTER SUBFAMILY A ABCA	6557	Vu09	7905848	7912404	PF00005,PF12698	PTHR19229	3.6.3.25	0	GO:0016887,GO:0005524,GO:0016021,GO:0006810,GO:0005215
Vung38980|c7_g3_i5	Vigun11g139000	Vigun11g139000.3	(1 of 1) PTHR33477//PTHR33477:SF1//PTHR33477:SF3 - FAMILY NOT NAMED // SUBFAMILY NOT NAMED // EMB|CAB72147.1	9701	Vu11	34811461	34821161	0	PTHR33477,PTHR33477:SF3	0	0	0
Vung73863|c0_g2_i1	Vigun03g339000	Vigun03g339000.1	(1 of 29) PF00069//PF00560//PF08263 - Protein kinase domain (Pkinase) // Leucine Rich Repeat (LRR_1) // Leucine rich repeat N-terminal domain (LRRNT_2)	4037	Vu03	53713656	53717692	PF08263,PF00560,PF00069	PTHR27000,PTHR27000:SF54	2.7.11.1	0	GO:0005515,GO:0006468,GO:0005524,GO:0004672
Vung120448|c0_g1_i1	Vigun05g232400	Vigun05g232400.2	(1 of 17) PF07714//PF08263 - Protein tyrosine kinase (Pkinase_Tyr) // Leucine rich repeat N-terminal domain (LRRNT_2)	4191	Vu05	42642859	42647049	PF08263,PF07714	PTHR27001,PTHR27001:SF84	2.7.11.1	0	GO:0006468,GO:0004672
Vung166315|c1_g2_i6	Vigun03g262300	Vigun03g262300.1	(1 of 2) PTHR23421//PTHR23421:SF79 - BETA-GALACTOSIDASE RELATED // BETA-GALACTOSIDASE 3	5800	Vu03	42991988	42997787	PF02140,PF01301	PTHR23421,PTHR23421:SF79	3.2.1.23	0	GO:0030246,GO:0005975,GO:0004553
Vung121687|c1_g3_i2	Vigun05g226800	Vigun05g226800.1	(1 of 3) 4.2.1.3 - Aconitate hydratase / Citrate(isocitrate) hydro-lyase	9135	Vu05	41931984	41941118	PF00694,PF00330	PTHR11670,PTHR11670:SF37	4.2.1.3	K01681	GO:0008152
Vung143775|c0_g1_i6	Vigun02g011200	Vigun02g011200.1	(1 of 2) PTHR10218//PTHR10218:SF226 - GTP-BINDING PROTEIN ALPHA SUBUNIT // EXTRA-LARGE GUANINE NUCLEOTIDE-BINDING PROTEIN 2	4526	Vu02	4408012	4412537	PF00503	PTHR10218,PTHR10218:SF226	0	0	GO:0031683,GO:0019001,GO:0007186,GO:0004871,GO:0003924
Vung40107|c1_g2_i11	Vigun07g224600	Vigun07g224600.2	0	5226	Vu07	34647906	34653131	0	PTHR33740,PTHR33740:SF3	0	0	0
Vung150570|c0_g1_i7	Vigun06g100500	Vigun06g100500.1	(1 of 2) PTHR11972:SF57 - RESPIRATORY BURST OXIDASE HOMOLOG PROTEIN	5689	Vu06	23065414	23071102	PF01794,PF08022,PF08414,PF08030	PTHR11972,PTHR11972:SF57	1.6.3.1	K13447	GO:0055114,GO:0016491,GO:0050664,GO:0004601,GO:0016174
Vung89190|c0_g1_i1	Vigun07g152300	Vigun07g152300.1	(1 of 1) PTHR10663//PTHR10663:SF114 - GUANYL-NUCLEOTIDE EXCHANGE FACTOR // PROTEIN MON2 HOMOLOG	32713	Vu07	26278842	26311554	PF09324,PF12783,PF16213,PF16206	PTHR10663,PTHR10663:SF114	0	0	GO:0015031
Vung99503|c0_g2_i2	Vigun06g101400	Vigun06g101400.1	(1 of 5) PTHR13859//PTHR13859:SF15 - ATROPHIN-RELATED // SUBFAMILY NOT NAMED	5041	Vu06	23151873	23156913	0	PTHR13859,PTHR13859:SF15	0	0	0
Vung65508|c5_g2_i3	Vigun01g198100	Vigun01g198100.1	(1 of 1298) 2.7.11.1 - Non-specific serine/threonine protein kinase / Threonine-specific protein kinase	6091	Vu01	37458483	37464573	PF00069	PTHR27001,PTHR27001:SF118	2.7.11.1	0	GO:0006468,GO:0005524,GO:0004672
Vung42778|c0_g1_i2	Vigun09g072000	Vigun09g072000.1	(1 of 2) PTHR19229//PTHR19229:SF127 - ATP-BINDING CASSETTE TRANSPORTER SUBFAMILY A ABCA // SUBFAMILY NOT NAMED	8936	Vu09	7924288	7933223	PF12698,PF00005	PTHR19229,PTHR19229:SF127	3.6.3.25	0	GO:0016887,GO:0005524,GO:0016021,GO:0006810,GO:0005215
Vung60392|c0_g2_i13	Vigun03g351600	Vigun03g351600.1	(1 of 2) PTHR10217:SF504 - POTASSIUM CHANNEL AKT1-RELATED	6472	Vu03	55312128	55318599	PF07885,PF00027,PF12796,PF13857,PF11834	PTHR10217,PTHR10217:SF504	0	0	0
Vung148406|c0_g2_i1	Vigun06g158000	Vigun06g158000.1	(1 of 2) PTHR27001//PTHR27001:SF21 - FAMILY NOT NAMED // PROTEIN STRUBBELIG-RECEPTOR FAMILY 6-RELATED	6719	Vu06	28139215	28145933	PF08263,PF13855,PF00069	PTHR27001,PTHR27001:SF21	2.7.11.1	0	GO:0005515,GO:0006468,GO:0005524,GO:0004672
Vung21816|c1_g1_i1	Vigun03g273800	Vigun03g273800.1	(1 of 12) PTHR23155//PTHR23155:SF543 - LEUCINE-RICH REPEAT-CONTAINING PROTEIN // SUBFAMILY NOT NAMED	4439	Vu03	44952764	44957202	PF05659,PF00931	PTHR23155,PTHR23155:SF543	0	0	GO:0043531
Vung21415|c0_g1_i8	Vigun08g142900	Vigun08g142900.1	(1 of 1) PTHR10217//PTHR10217:SF478 - VOLTAGE AND LIGAND GATED POTASSIUM CHANNEL // POTASSIUM CHANNEL GORK-RELATED	10805	Vu08	31521422	31532226	PF00027,PF11834,PF12796,PF00520	PTHR10217,PTHR10217:SF478	0	0	GO:0055085,GO:0016020,GO:0006811,GO:0005216
Vung4299|c1_g3_i20	Vigun08g098300	Vigun08g098300.1	(1 of 2) PTHR30620:SF8 - BETA-D-XYLOSIDASE 7-RELATED	4871	Vu08	23789725	23794595	PF14310,PF00933,PF01915	PTHR30620,PTHR30620:SF8	3.2.1.55,3.2.1.37	0	GO:0005975,GO:0004553
Vung98909|c0_g1_i2	Vigun03g038500	Vigun03g038500.1	(1 of 50) PF00069//PF08263//PF13855 - Protein kinase domain (Pkinase) // Leucine rich repeat N-terminal domain (LRRNT_2) // Leucine rich repeat (LRR_8)	3973	Vu03	2937403	2941375	PF08263,PF13855,PF00069	PTHR27008,PTHR27008:SF15	2.7.11.1	0	GO:0005515,GO:0006468,GO:0005524,GO:0004672
Vung60392|c0_g2_i10	Vigun03g351600	Vigun03g351600.2	(1 of 2) PTHR10217:SF504 - POTASSIUM CHANNEL AKT1-RELATED	6472	Vu03	55312128	55318599	PF00027,PF12796,PF13857,PF11834,PF00520	PTHR10217,PTHR10217:SF504	0	0	GO:0055085,GO:0016020,GO:0006811,GO:0005216
Vung108608|c0_g1_i1	Vigun11g163400	Vigun11g163400.1	(1 of 4) PTHR10024//PTHR10024:SF243 - SYNAPTOTAGMIN // ANTHRANILATE PHOSPHORIBOSYLTRANSFERASE-LIKE PROTEIN	3296	Vu11	37089664	37092959	PF06398,PF00168	PTHR10024,PTHR10024:SF243	0	0	GO:0005515
Vung19819|c0_g1_i4	Vigun10g061100	Vigun10g061100.1	(1 of 1) PTHR31741//PTHR31741:SF4 - FAMILY NOT NAMED // O-FUCOSYLTRANSFERASE FAMILY PROTEIN	4805	Vu10	12561539	12566343	PF10250	PTHR31741,PTHR31741:SF4	0	0	0
Vung33074|c3_g1_i3	Vigun05g200900	Vigun05g200900.1	(1 of 6) PF00954//PF01453//PF07714//PF08276//PF11883 - S-locus glycoprotein domain (S_locus_glycop) // D-mannose binding lectin (B_lectin) // Protein tyrosine kinase (Pkinase_Tyr) // PAN-like domain (PAN_2) // Domain of unknown function (DUF3403) (DUF3403)	4360	Vu05	38807897	38812256	PF11883,PF08276,PF00954,PF01453,PF07714	PTHR27002,PTHR27002:SF97	2.7.11.1	0	GO:0004674,GO:0048544,GO:0006468,GO:0004672
Vung107420|c0_g1_i2	Vigun01g196800	Vigun01g196800.1	(1 of 1) K02210 - DNA replication licensing factor MCM7 (MCM7, CDC47)	5441	Vu01	37359265	37364705	PF14551,PF00493	PTHR11630,PTHR11630:SF26	3.6.4.12	K02210	GO:0006260,GO:0005524,GO:0003677,GO:0042555,GO:0006270,GO:0005634,GO:0003678
Vung166315|c1_g2_i2	Vigun02g126200	Vigun02g126200.1	(1 of 2) PTHR23421//PTHR23421:SF79 - BETA-GALACTOSIDASE RELATED // BETA-GALACTOSIDASE 3	5874	Vu02	27843964	27849837	PF02140,PF01301	PTHR23421,PTHR23421:SF79	3.2.1.23	0	GO:0030246,GO:0005975,GO:0004553
Vung6626|c0_g1_i1	Vigun07g229900	Vigun07g229900.1	(1 of 190) PF00847 - AP2 domain (AP2)	2718	Vu07	35188780	35191497	PF00847	PTHR31985,PTHR31985:SF30	0	0	GO:0006355,GO:0003700
Vung150834|c0_g1_i1	Vigun10g117900	Vigun10g117900.2	(1 of 2) PTHR10795//PTHR10795:SF387 - PROPROTEIN CONVERTASE SUBTILISIN/KEXIN // SUBTILISIN-LIKE SERINE PROTEASE-RELATED	3033	Vu10	32419661	32422693	PF05922,PF02225,PF00082	PTHR10795,PTHR10795:SF387	3.4.21.25	0	GO:0006508,GO:0004252
Vung4447|c0_g3_i1	Vigun09g235900	Vigun09g235900.1	(1 of 7) PF07714//PF13855 - Protein tyrosine kinase (Pkinase_Tyr) // Leucine rich repeat (LRR_8)	3855	Vu09	40636943	40640797	PF13855,PF07714	PTHR27008,PTHR27008:SF39	2.7.11.1	0	GO:0005515,GO:0006468,GO:0004672
Vung4040|c1_g3_i3	Vigun05g150700	Vigun05g150700.1	(1 of 3) PTHR27002//PTHR27002:SF128 - FAMILY NOT NAMED // CYSTEINE-RICH RECEPTOR-LIKE PROTEIN KINASE 42	3968	Vu05	22686317	22690284	PF01657,PF00069	PTHR27002,PTHR27002:SF128	2.7.11.1	0	GO:0006468,GO:0005524,GO:0004672
Vung91624|c0_g1_i14	Vigun01g055200	Vigun01g055200.1	(1 of 1) K04121 - ent-kaurene synthase (E4.2.3.19)	7235	Vu01	10723453	10730687	PF01397,PF03936	PTHR31739,PTHR31739:SF3	4.2.3.19	K04121	GO:0016829,GO:0010333,GO:0008152,GO:0000287
Vung38105|c0_g2_i1	Vigun09g197000	Vigun09g197000.1	(1 of 16) PF04783 - Protein of unknown function (DUF630) (DUF630)	3655	Vu09	37211979	37215633	PF04783,PF04782	PTHR21450,PTHR21450:SF7	0	0	0
Vung146575|c0_g1_i3	Vigun06g214300	Vigun06g214300.1	(1 of 2) PF00069//PF07714//PF08263//PF13855 - Protein kinase domain (Pkinase) // Protein tyrosine kinase (Pkinase_Tyr) // Leucine rich repeat N-terminal domain (LRRNT_2) // Leucine rich repeat (LRR_8)	3596	Vu06	32568496	32572091	PF08263,PF13855,PF00069	PTHR27000,PTHR27000:SF75	2.7.11.1	0	GO:0005515,GO:0006468,GO:0005524,GO:0004672
Vung71638|c0_g1_i2	Vigun05g276500	Vigun05g276500.1	(1 of 2) PTHR18896//PTHR18896:SF79 - PHOSPHOLIPASE D // PHOSPHOLIPASE D EPSILON	3146	Vu05	46636149	46639294	PF00168,PF00614,PF12357	PTHR18896,PTHR18896:SF79	3.1.4.4	K01115	GO:0005515,GO:0003824
Vung77267|c0_g2_i1	Vigun01g065600	Vigun01g065600.1	(1 of 15) PF14576//PF14577 - Sieve element occlusion N-terminus (SEO_N) // Sieve element occlusion C-terminus (SEO_C)	3853	Vu01	17349782	17353634	PF14577,PF14576	PTHR33232,PTHR33232:SF4	0	0	0
Vung64579|c0_g1_i1	Vigun01g168300	Vigun01g168300.1	(1 of 21) PF00069//PF08263 - Protein kinase domain (Pkinase) // Leucine rich repeat N-terminal domain (LRRNT_2)	2739	Vu01	34990086	34992824	PF08263,PF00069	PTHR27008,PTHR27008:SF33	2.7.11.1	0	GO:0006468,GO:0005524,GO:0004672
Vung40300|c1_g1_i3	Vigun09g177900	Vigun09g177900.1	(1 of 1) PTHR12480//PTHR12480:SF5 - PHOSPHATIDYLSERINE RECEPTOR // BIFUNCTIONAL ARGININE DEMETHYLASE AND LYSYL-HYDROXYLASE JMJD6	10445	Vu09	35025800	35036244	PF12937,PF13621	PTHR12480,PTHR12480:SF5	0	0	GO:0005515
Vung102400|c0_g1_i3	Vigun03g305700	Vigun03g305700.1	(1 of 2) PTHR31953:SF17 - ACID BETA-FRUCTOFURANOSIDASE 3, VACUOLAR-RELATED	4271	Vu03	49613949	49618219	PF08244,PF11837,PF00251	PTHR31953,PTHR31953:SF17	3.2.1.26	K01193	GO:0004575,GO:0004564
Vung120892|c0_g2_i8	Vigun03g176300	Vigun03g176300.1	(1 of 1) 6.2.1.20//6.2.1.3 - Long-chain-fatty-acid--[acyl-carrier-protein] ligase / Acyl-[acyl-carrier-protein] synthetase // Long-chain-fatty-acid--CoA ligase / Lignoceroyl-CoA synthase	12801	Vu03	21861278	21874078	PF00501	PTHR24096,PTHR24096:SF199	6.2.1.3,6.2.1.20	K01897	GO:0008152,GO:0003824
Vung37422|c0_g1_i2	Vigun11g152700	Vigun11g152700.1	(1 of 6) PF06136 - Domain of unknown function (DUF966) (DUF966)	4646	Vu11	36245707	36250352	PF06136	PTHR31083,PTHR31083:SF4	0	0	0
Vung159447|c2_g3_i10	Vigun08g102900	Vigun08g102900.1	(1 of 3) 2.5.1.54 - 3-deoxy-7-phosphoheptulonate synthase / Phospho-2-oxo-3-deoxyheptonate aldolase	5714	Vu08	25550639	25556352	PF01474	PTHR21337,PTHR21337:SF7	2.5.1.54	K01626	GO:0009073,GO:0003849
Vung131135|c0_g3_i3	Vigun07g213700	Vigun07g213700.1	(1 of 1) PTHR24056//PTHR24056:SF221 - CELL DIVISION PROTEIN KINASE // SUBFAMILY NOT NAMED	3976	Vu07	33510456	33514431	PF00069	PTHR24056,PTHR24056:SF221	2.7.11.22,2.7.11.23	K08819	GO:0006468,GO:0005524,GO:0004672
Vung166588|c1_g1_i6	Vigun03g058000	Vigun03g058000.2	(1 of 2) PF10537 - ATP-utilising chromatin assembly and remodelling N-terminal (WAC_Acf1_DNA_bd)	6959	Vu03	4695894	4702852	PF15613,PF15614,PF02791,PF10537	PTHR15546	0	0	0
Vung75625|c0_g4_i2	Vigun05g248900	Vigun05g248900.1	(1 of 2) PTHR18929:SF74 - PROTEIN DISULFIDE-ISOMERASE A3	4705	Vu05	44255938	44260642	PF13899,PF13848,PF00085	PTHR18929,PTHR18929:SF74	5.3.4.1	K09580	GO:0045454
Vung36481|c0_g1_i1	Vigun07g195200	Vigun07g195200.1	(1 of 2) PTHR27003//PTHR27003:SF5 - FAMILY NOT NAMED // DI-GLUCOSE BINDING PROTEIN WITH LEUCINE-RICH REPEAT DOMAIN	4677	Vu07	31459448	31464124	PF11721	PTHR27003,PTHR27003:SF5	2.7.11.1	0	0
Vung75131|c0_g1_i1	Vigun03g219400	Vigun03g219400.1	(1 of 2) KOG4629 - Predicted mechanosensitive ion channel	5148	Vu03	36513249	36518396	PF00924	PTHR31618,PTHR31618:SF5	0	0	GO:0055085,GO:0016020
Vung57257|c0_g2_i1	Vigun06g176800	Vigun06g176800.1	(1 of 1) K09832 - cytochrome P450, family 710, subfamily A (CYP710A)	2629	Vu06	29692314	29694942	PF00067	PTHR24286,PTHR24286:SF0	0	K09832	GO:0055114,GO:0020037,GO:0016705,GO:0005506
Vung68632|c0_g1_i3	Vigun11g155300	Vigun11g155300.1	(1 of 3) PTHR12276//PTHR12276:SF10 - EPSIN/ENT-RELATED // ENTH/VHS FAMILY PROTEIN	3152	Vu11	36461165	36464316	PF01417	PTHR12276,PTHR12276:SF10	0	0	0
Vung129731|c0_g1_i3	Vigun10g176900	Vigun10g176900.1	(1 of 2) PTHR31042:SF24 - CORE-2/I-BRANCHING BETA-1,6-N-ACETYLGLUCOSAMINYLTRANSFERASE FAMILY PROTEIN	4962	Vu10	39524250	39529211	PF02485	PTHR31042,PTHR31042:SF24	0	0	GO:0016020,GO:0008375
Vung78769|c0_g1_i21	Vigun11g056400	Vigun11g056400.2	(1 of 6) K01595 - phosphoenolpyruvate carboxylase (ppc)	7430	Vu11	11081606	11089035	PF00311	PTHR30523,PTHR30523:SF8	4.1.1.31	K01595	GO:0015977,GO:0008964,GO:0006099
Vung96970|c0_g2_i1	Vigun06g025600	Vigun06g025600.1	(1 of 15) PF14576//PF14577 - Sieve element occlusion N-terminus (SEO_N) // Sieve element occlusion C-terminus (SEO_C)	4161	Vu06	11797526	11801686	PF14577,PF14576	PTHR33232,PTHR33232:SF5	0	0	0
Vung21971|c0_g1_i1	Vigun09g252700	Vigun09g252700.1	(1 of 2) PTHR22298:SF57 - ENDOGLUCANASE 10-RELATED	7822	Vu09	41981089	41988910	PF00759	PTHR22298,PTHR22298:SF57	3.2.1.4	0	GO:0005975,GO:0004553
Vung165900|c4_g3_i1	Vigun06g016100	Vigun06g016100.1	(1 of 15) PF14576//PF14577 - Sieve element occlusion N-terminus (SEO_N) // Sieve element occlusion C-terminus (SEO_C)	8843	Vu06	7586476	7595318	PF14577,PF14576	PTHR33232,PTHR33232:SF5	0	0	0
Vung76111|c0_g1_i1	Vigun08g109200	Vigun08g109200.2	(1 of 1) PTHR21736//PTHR21736:SF24 - VERNALIZATION-INSENSITIVE PROTEIN 3 // SUBFAMILY NOT NAMED	4203	Vu08	27163682	27167884	PF07227	PTHR21736,PTHR21736:SF24	0	0	0
Vung122912|c0_g1_i9	Vigun03g344300	Vigun03g344300.1	(1 of 1) PTHR12565:SF153 - TRANSCRIPTION FACTOR BIM1	7313	Vu03	54345533	54352845	PF00010	PTHR12565,PTHR12565:SF153	0	0	GO:0046983
Vung21404|c0_g1_i1	Vigun05g247000	Vigun05g247000.1	(1 of 3) PTHR10579//PTHR10579:SF61 - CALCIUM-ACTIVATED CHLORIDE CHANNEL REGULATOR // C3H4 TYPE ZINC FINGER PROTEIN-RELATED	4531	Vu05	44041212	44045742	PF17123,PF14624,PF00092	PTHR10579,PTHR10579:SF61	0	0	0
Vung98991|c0_g2_i1	Vigun09g006000	Vigun09g006000.1	(1 of 1) PTHR31561//PTHR31561:SF1 - FAMILY NOT NAMED // 3-KETOACYL-COA SYNTHASE 1-RELATED	2237	Vu09	435714	437950	PF08541,PF08392	PTHR31561,PTHR31561:SF1	2.3.1.199,2.3.1.119	K15397	GO:0016747,GO:0008610,GO:0016020,GO:0006633
Vung1378|c4_g3_i1	Vigun03g371800	Vigun03g371800.1	(1 of 3) PTHR10766//PTHR10766:SF37 - TRANSMEMBRANE 9 SUPERFAMILY PROTEIN // ENDOMEMBRANE PROTEIN 70 FAMILY PROTEIN	3384	Vu03	57461734	57465117	PF02990	PTHR10766,PTHR10766:SF37	0	K17086	GO:0016021
Vung102227|c1_g2_i6	Vigun02g152700	Vigun02g152700.4	(1 of 1) PTHR31311//PTHR31311:SF3 - FAMILY NOT NAMED // GLYCOSYLTRANSFERASE 6-RELATED	5467	Vu02	29932618	29938084	PF05637	PTHR31311,PTHR31311:SF3	2.4.2.39	0	GO:0016757,GO:0016021
Vung12209|c0_g1_i1	Vigun01g147400	Vigun01g147400.1	(1 of 2) PTHR11062//PTHR11062:SF56 - EXOSTOSIN HEPARAN SULFATE GLYCOSYLTRANSFERASE -RELATED // XYLOGLUCAN GALACTOSYLTRANSFERASE KATAMARI1	3221	Vu01	32895749	32898969	PF03016	PTHR11062,PTHR11062:SF56	0	0	0
Vung91624|c0_g1_i13	Vigun01g055200	Vigun01g055200.1	(1 of 1) K04121 - ent-kaurene synthase (E4.2.3.19)	7235	Vu01	10723453	10730687	PF01397,PF03936	PTHR31739,PTHR31739:SF3	4.2.3.19	K04121	GO:0016829,GO:0010333,GO:0008152,GO:0000287
Vung146446|c2_g2_i12	Vigun08g011600	Vigun08g011600.1	(1 of 2) PTHR23421//PTHR23421:SF51 - BETA-GALACTOSIDASE RELATED // BETA-GALACTOSIDASE 5	5806	Vu08	1006169	1011974	PF01301	PTHR23421,PTHR23421:SF51	3.2.1.23	0	GO:0005975,GO:0004553
Vung164187|c0_g1_i3	Vigun01g139000	Vigun01g139000.1	(1 of 166) PF00646 - F-box domain (F-box)	5147	Vu01	31923605	31928751	PF00646	PTHR24006	0	0	GO:0005515
Vung59808|c2_g2_i1	Vigun03g350500	Vigun03g350500.1	(1 of 29) PF00069//PF00560//PF08263 - Protein kinase domain (Pkinase) // Leucine Rich Repeat (LRR_1) // Leucine rich repeat N-terminal domain (LRRNT_2)	4908	Vu03	55148468	55153375	PF00560,PF08263,PF00069	PTHR27008,PTHR27008:SF24	2.7.11.1	0	GO:0005515,GO:0006468,GO:0005524,GO:0004672
Vung140577|c0_g1_i2	Vigun01g240100	Vigun01g240100.1	(1 of 1) PTHR10551//PTHR10551:SF9 - FASCIN // PROTEIN SINGED	5433	Vu01	41043131	41048563	PF06268,PF00150	PTHR10551,PTHR10551:SF9	3.2.1.58	0	GO:0051015,GO:0030674,GO:0005975,GO:0004553,GO:0007015
Vung119255|c0_g1_i1	Vigun06g097700	Vigun06g097700.1	(1 of 1) PTHR31707:SF34 - PECTINESTERASE/PECTINESTERASE INHIBITOR 22-RELATED	2681	Vu06	22873221	22875901	PF04043,PF01095	PTHR31707,PTHR31707:SF34	3.1.1.11	K01051	GO:0004857,GO:0042545,GO:0030599,GO:0005618
Vung3752|c1_g2_i1	Vigun02g059600	Vigun02g059600.1	(1 of 1) PTHR11552//PTHR11552:SF140 - GLUCOSE-METHANOL-CHOLINE GMC OXIDOREDUCTASE // F7A19.28 PROTEIN	2458	Vu02	20497397	20499854	PF05199,PF00732	PTHR11552,PTHR11552:SF140	4.1.2.10	0	GO:0055114,GO:0016614,GO:0050660
Vung61965|c0_g1_i2	Vigun03g203800	Vigun03g203800.1	(1 of 2) PTHR10353//PTHR10353:SF26 - GLYCOSYL HYDROLASE // BETA-GLUCOSIDASE 40	10225	Vu03	32809343	32819567	PF00232	PTHR10353,PTHR10353:SF26	3.2.1.21	K01188	GO:0005975,GO:0004553
Vung80653|c3_g1_i3	Vigun01g052000	Vigun01g052000.1	(1 of 9) K11855 - ubiquitin carboxyl-terminal hydrolase 36/42 [EC:3.4.19.12] (USP36_42)	12340	Vu01	8587759	8600098	PF13423	PTHR24006	3.4.19.12	K11855	0
Vung36189|c0_g1_i4	Vigun09g189400	Vigun09g189400.2	(1 of 1) K17613 - calcineurin-binding protein cabin-1 (CABIN1)	12496	Vu09	36419295	36431790	0	PTHR15502,PTHR15502:SF7	0	0	0
Vung154789|c0_g1_i20	Vigun06g177400	Vigun06g177400.2	(1 of 2) PTHR10217//PTHR10217:SF520 - VOLTAGE AND LIGAND GATED POTASSIUM CHANNEL // SUBFAMILY NOT NAMED	5016	Vu06	29764209	29769224	PF00027,PF07885,PF11834	PTHR10217,PTHR10217:SF520	0	0	0
Vung62154|c1_g2_i8	Vigun03g307500	Vigun03g307500.1	(1 of 2) PTHR31096:SF6 - ACR7-RELATED	3438	Vu03	49861611	49865048	PF01842	PTHR31096,PTHR31096:SF6	2.7.7.59	0	GO:0016597,GO:0008152
Vung152958|c2_g2_i5	Vigun01g151800	Vigun01g151800.1	(1 of 5) PTHR24320:SF81 - NAD(P)-BINDING ROSSMANN-FOLD SUPERFAMILY PROTEIN	4899	Vu01	33474128	33479026	PF00106	PTHR24320,PTHR24320:SF81	1.1.1.330	0	GO:0016491,GO:0008152
Vung137002|c1_g1_i1	Vigun10g186200	Vigun10g186200.1	(1 of 1) PTHR10177//PTHR10177:SF239 - CYCLINE // CYCLIN-A2-3-RELATED	5418	Vu10	40243802	40249219	PF02984,PF00134	PTHR10177,PTHR10177:SF239	0	K06627	GO:0005634
Vung74540|c1_g1_i1	Vigun01g112200	Vigun01g112200.1	(1 of 3) PTHR11728:SF17 - 6-PHOSPHOGLUCONATE DEHYDROGENASE-LIKE PROTEIN	4846	Vu01	28613023	28617868	PF01210,PF07479	PTHR11728,PTHR11728:SF17	1.1.1.8	K00006	GO:0055114,GO:0051287,GO:0046168,GO:0016616,GO:0005975,GO:0004367,GO:0009331,GO:0006072
Vung87174|c3_g1_i1	Vigun09g258200	Vigun09g258200.1	(1 of 2) PTHR11709:SF90 - MULTI-COPPER OXIDASE TYPE I FAMILY PROTEIN-RELATED	6237	Vu09	42379690	42385926	PF07731,PF07732,PF00394	PTHR11709,PTHR11709:SF90	1.10.3.2	0	GO:0055114,GO:0016491,GO:0005507
Vung117893|c0_g3_i1	Vigun06g096700	Vigun06g096700.1	(1 of 2) PTHR31989//PTHR31989:SF6 - FAMILY NOT NAMED // F12P19.8 PROTEIN	3841	Vu06	22802786	22806626	PF02365	PTHR31989,PTHR31989:SF6	0	0	GO:0006355,GO:0003677
Vung55974|c3_g2_i2	Vigun07g075800	Vigun07g075800.1	(1 of 4) K10775 - phenylalanine ammonia-lyase (E4.3.1.24)	4866	Vu07	9900198	9905063	PF00221	PTHR10362,PTHR10362:SF19	4.3.1.24	K10775	0
Vung88811|c0_g1_i4	Vigun03g349000	Vigun03g349000.3	(1 of 1) KOG2432 - Uncharacterized conserved protein	5070	Vu03	54940842	54945911	PF08616	PTHR13677,PTHR13677:SF0	0	0	0
Vung29441|c0_g1_i2	Vigun10g147500	Vigun10g147500.1	(1 of 1) PTHR11709//PTHR11709:SF33 - MULTI-COPPER OXIDASE // LACCASE-6	3388	Vu10	36575986	36579373	PF07732,PF07731,PF00394	PTHR11709,PTHR11709:SF33	1.10.3.2	K05909	GO:0005507,GO:0055114,GO:0016491
Vung161324|c0_g1_i1	Vigun07g193300	Vigun07g193300.1	(1 of 1) PTHR24298:SF47 - CYTOCHROME P450 77A4-RELATED	2646	Vu07	31257507	31260152	PF00067	PTHR24298,PTHR24298:SF47	0	K00517	GO:0055114,GO:0020037,GO:0016705,GO:0005506
Vung138583|c1_g1_i2	Vigun07g051200	Vigun07g051200.1	(1 of 2) PTHR31683:SF20 - PECTATE LYASE 1-RELATED	5517	Vu07	5319600	5325116	PF00544	PTHR31683,PTHR31683:SF20	4.2.2.2	K01728	0
Vung99730|c0_g4_i3	Vigun03g113800	Vigun03g113800.1	(1 of 7) K17871 - NADH:ubiquinone reductase (non-electrogenic) (ndh1)	4408	Vu03	10433239	10437646	PF00070	PTHR22912	1.6.5.9	K17871	GO:0055114,GO:0016491
Vung147254|c2_g3_i2	Vigun10g156300	Vigun10g156300.1	(1 of 2) K03691 - peptide-O-fucosyltransferase (POFUT)	3096	Vu10	37599371	37602466	PF10250	PTHR13398	2.4.1.221	K03691	0
Vung39997|c1_g1_i15	Vigun03g334300	Vigun03g334300.2	(1 of 2) PTHR19229//PTHR19229:SF127 - ATP-BINDING CASSETTE TRANSPORTER SUBFAMILY A ABCA // SUBFAMILY NOT NAMED	17363	Vu03	53235544	53252906	PF12698,PF00005	PTHR19229,PTHR19229:SF127	3.6.3.29	0	GO:0016887,GO:0005524,GO:0016021,GO:0006810,GO:0005215
Vung146796|c3_g3_i4	Vigun11g044900	Vigun11g044900.1	(1 of 1) PF00069//PF00954//PF01453//PF07714//PF08276//PF11883 - Protein kinase domain (Pkinase) // S-locus glycoprotein domain (S_locus_glycop) // D-mannose binding lectin (B_lectin) // Protein tyrosine kinase (Pkinase_Tyr) // PAN-like domain (PAN_2) // Domain of unknown function (DUF3403) (DUF3403)	6937	Vu11	6738619	6745555	PF11883,PF08276,PF00954,PF01453,PF00069	PTHR27002,PTHR27002:SF129	2.7.11.1	0	GO:0004674,GO:0048544,GO:0006468,GO:0005524,GO:0004672
Vung53644|c2_g4_i4	Vigun02g166300	Vigun02g166300.1	(1 of 2) 2.4.1.186 - Glycogenin glucosyltransferase / Priming glucosyltransferase	4362	Vu02	31038400	31042761	0	PTHR11183,PTHR11183:SF55	2.4.1.186	0	0
Vung8035|c1_g1_i6	Vigun01g187900	Vigun01g187900.2	(1 of 2) PTHR32370:SF30 - BTB/POZ DOMAIN-CONTAINING PROTEIN SETH6	4120	Vu01	36746940	36751059	PF00651,PF03000	PTHR32370,PTHR32370:SF30	0	0	GO:0005515
Vung80774|c3_g1_i2	Vigun07g090100	Vigun07g090100.1	(1 of 13) PTHR27002//PTHR27002:SF122 - FAMILY NOT NAMED // CYSTEINE-RICH RECEPTOR-LIKE PROTEIN KINASE 28-RELATED	3224	Vu07	14172638	14175861	PF01657,PF07714	PTHR27002,PTHR27002:SF122	2.7.11.1	0	GO:0006468,GO:0004672
Vung67665|c0_g1_i4	Vigun06g214100	Vigun06g214100.1	0	3190	Vu06	32558421	32561610	0	PTHR37241	0	0	0
Vung18446|c1_g1_i3	Vigun01g014700	Vigun01g014700.1	(1 of 16) PTHR27002//PTHR27002:SF95 - FAMILY NOT NAMED // G-TYPE LECTIN S-RECEPTOR-LIKE SERINE/THREONINE-PROTEIN KINASE B120	4057	Vu01	1628283	1632339	PF11883,PF01657,PF07714	PTHR27002,PTHR27002:SF95	2.7.11.1	0	GO:0004674,GO:0006468,GO:0004672
Vung142615|c0_g1_i4	Vigun09g043400	Vigun09g043400.1	(1 of 3) PTHR31707:SF10 - PECTINESTERASE/PECTINESTERASE INHIBITOR 32-RELATED	3509	Vu09	4056595	4060103	PF04043,PF01095	PTHR31707,PTHR31707:SF10	3.1.1.11	K01051	GO:0004857,GO:0042545,GO:0030599,GO:0005618
Vung21519|c2_g2_i2	Vigun05g270900	Vigun05g270900.1	(1 of 2) PTHR32002//PTHR32002:SF7 - FAMILY NOT NAMED // PROTEIN NLP8-RELATED	7295	Vu05	46242028	46249322	PF00564,PF02042	PTHR32002,PTHR32002:SF7	0	0	GO:0005515
Vung122912|c0_g1_i10	Vigun03g344300	Vigun03g344300.1	(1 of 1) PTHR12565:SF153 - TRANSCRIPTION FACTOR BIM1	7313	Vu03	54345533	54352845	PF00010	PTHR12565,PTHR12565:SF153	0	0	GO:0046983
Vung4407|c0_g1_i1	Vigun02g124600	Vigun02g124600.4	(1 of 1) PTHR24115//PTHR24115:SF496 - FAMILY NOT NAMED // ATP BINDING MICROTUBULE MOTOR FAMILY PROTEIN	6650	Vu02	27655961	27662610	PF11995,PF00225	PTHR24115,PTHR24115:SF496	3.6.4.4	K11498	GO:0008017,GO:0007018,GO:0005524,GO:0003777,GO:0005871
Vung130869|c0_g1_i1	Vigun01g238900	Vigun01g238900.1	(1 of 2) 3.3.1.1 - Adenosylhomocysteinase / SAHase	2484	Vu01	40974390	40976873	PF02826,PF05221	PTHR23420	3.3.1.1	K01251	GO:0055114,GO:0051287,GO:0006730,GO:0004013
Vung60055|c6_g4_i1	Vigun01g197400	Vigun01g197400.1	(1 of 1) PTHR32285:SF19 - PROTEIN TRICHOME BIREFRINGENCE-LIKE 6	2481	Vu01	37406346	37408826	PF14416,PF13839	PTHR32285,PTHR32285:SF19	0	0	0
Vung30965|c0_g1_i2	Vigun08g031700	Vigun08g031700.1	(1 of 1) K14548 - U3 small nucleolar RNA-associated protein 4 (UTP4, CIRH1A)	6740	Vu08	2882303	2889042	0	PTHR22847	0	K14548	0
Vung9809|c1_g1_i4	Vigun07g160100	Vigun07g160100.1	(1 of 40) PF03080 - Domain of unknown function (DUF239) (DUF239)	3366	Vu07	27192185	27195550	PF14365,PF03080	PTHR31589,PTHR31589:SF4	0	0	0
Vung38980|c7_g3_i3	Vigun11g139000	Vigun11g139000.7	(1 of 1) PTHR33477//PTHR33477:SF1//PTHR33477:SF3 - FAMILY NOT NAMED // SUBFAMILY NOT NAMED // EMB|CAB72147.1	9701	Vu11	34811461	34821161	0	PTHR33477,PTHR33477:SF1	0	0	0
Vung52970|c0_g2_i1	Vigun08g014700	Vigun08g014700.1	(1 of 1) PTHR33472:SF3 - OXIDOREDUCTASE	2259	Vu08	1262643	1264901	0	PTHR33472,PTHR33472:SF3	0	0	0
Vung87764|c0_g1_i2	Vigun02g155700	Vigun02g155700.1	(1 of 2) PTHR31500//PTHR31500:SF17 - FAMILY NOT NAMED // AT HOOK MOTIF DNA-BINDING FAMILY PROTEIN	4272	Vu02	30220271	30224542	PF03479	PTHR31500,PTHR31500:SF17	0	0	0
Vung39046|c0_g1_i1	Vigun07g192900	Vigun07g192900.1	(1 of 1) PTHR32044//PTHR32044:SF21 - FAMILY NOT NAMED // MANNAN SYNTHASE 7-RELATED	3690	Vu07	31191399	31195088	PF13632	PTHR32044,PTHR32044:SF21	2.4.1.32	K13680	0
Vung137946|c0_g1_i1	Vigun09g243000	Vigun09g243000.1	(1 of 2) 4.2.1.92 - Hydroperoxide dehydratase / Hydroperoxide isomerase	1916	Vu09	41210099	41212014	PF00067	PTHR24286,PTHR24286:SF50	4.2.1.92	K01723	GO:0055114,GO:0020037,GO:0016705,GO:0005506
Vung8481|c0_g1_i1	Vigun10g146900	Vigun10g146900.1	(1 of 2) PTHR11514//PTHR11514:SF47 - MYC // TRANSCRIPTION FACTOR ABA-INDUCIBLE BHLH-TYPE-RELATED	1872	Vu10	36487123	36488994	PF00010,PF14215	PTHR11514,PTHR11514:SF47	0	0	GO:0046983
Vung41091|c0_g2_i3	Vigun05g199100	Vigun05g199100.1	(1 of 2) PTHR10217:SF476 - CYCLIC NUCLEOTIDE-GATED ION CHANNEL 4	5146	Vu05	38525174	38530319	PF00027,PF00520	PTHR10217,PTHR10217:SF476	0	0	GO:0055085,GO:0016020,GO:0006811,GO:0005216
Vung20542|c0_g1_i1	Vigun11g001000	Vigun11g001000.1	(1 of 1) K15027 - translation initiation factor 2D (EIF2D)	5269	Vu11	161806	167074	PF01253	PTHR12217,PTHR12217:SF4	0	K15027	GO:0006413,GO:0003743
Vung108509|c0_g1_i2	Vigun02g034900	Vigun02g034900.1	(1 of 21) PF00069//PF08263 - Protein kinase domain (Pkinase) // Leucine rich repeat N-terminal domain (LRRNT_2)	5522	Vu02	14592552	14598073	PF08263,PF00069	PTHR27008,PTHR27008:SF44	2.7.11.1	0	GO:0006468,GO:0005524,GO:0004672
Vung4299|c1_g3_i4	Vigun08g098400	Vigun08g098400.1	(1 of 3) PTHR17985//PTHR17985:SF13 - SER/THR-RICH PROTEIN T10 IN DGCR REGION // SUBFAMILY NOT NAMED	7797	Vu08	23806204	23814000	PF05742	PTHR17985,PTHR17985:SF13	0	0	0
Vung115611|c0_g2_i3	Vigun01g186200	Vigun01g186200.1	(1 of 9) K14486 - auxin response factor (K14486, ARF)	8273	Vu01	36623819	36632091	PF02362,PF06507	PTHR31384,PTHR31384:SF25	0	K14486	GO:0003677,GO:0009725,GO:0006355,GO:0005634
Vung119492|c1_g1_i2	Vigun06g226100	Vigun06g226100.1	(1 of 4) PTHR11926//PTHR11926:SF286 - GLUCOSYL/GLUCURONOSYL TRANSFERASES // SUBFAMILY NOT NAMED	2043	Vu06	33414791	33416833	PF00201	PTHR11926,PTHR11926:SF286	2.4.1.324	0	GO:0016758,GO:0008152
Vung63832|c0_g1_i2	Vigun05g196000	Vigun05g196000.1	(1 of 1) PTHR13780:SF39 - CBS DOMAIN-CONTAINING PROTEIN-RELATED	2882	Vu05	37868773	37871654	PF00571	PTHR13780,PTHR13780:SF39	0	0	0
Vung31455|c1_g2_i1	Vigun05g198800	Vigun05g198800.1	(1 of 4) PTHR13140:SF384 - MYOSIN-2	10844	Vu05	38467570	38478413	PF02736,PF00612,PF00063	PTHR13140,PTHR13140:SF384	3.6.4.1	K10357	GO:0016459,GO:0005524,GO:0003774,GO:0005515
Vung33771|c0_g1_i2	Vigun02g198400	Vigun02g198400.1	(1 of 3) PTHR31707//PTHR31707:SF32 - FAMILY NOT NAMED // PECTINESTERASE-RELATED PROTEIN-RELATED	1953	Vu02	33337075	33339027	PF04043,PF01095	PTHR31707,PTHR31707:SF32	3.1.1.11	K01051	GO:0004857,GO:0042545,GO:0030599,GO:0005618
Vung147076|c0_g1_i1	Vigun06g158400	Vigun06g158400.1	(1 of 8) K15601 - lysine-specific demethylase 3 [EC:1.14.11.-] (KDM3)	3521	Vu06	28172346	28175866	PF02373	PTHR12549,PTHR12549:SF16	0	K15601	0
Vung49262|c0_g1_i1	Vigun06g226000	Vigun06g226000.1	(1 of 4) PTHR11926//PTHR11926:SF227 - GLUCOSYL/GLUCURONOSYL TRANSFERASES // SUBFAMILY NOT NAMED	1808	Vu06	33412660	33414467	PF00201	PTHR11926,PTHR11926:SF227	2.4.1.273	0	GO:0016758,GO:0008152
Vung4040|c1_g3_i1	Vigun05g150700	Vigun05g150700.1	(1 of 3) PTHR27002//PTHR27002:SF128 - FAMILY NOT NAMED // CYSTEINE-RICH RECEPTOR-LIKE PROTEIN KINASE 42	3968	Vu05	22686317	22690284	PF01657,PF00069	PTHR27002,PTHR27002:SF128	2.7.11.1	0	GO:0006468,GO:0005524,GO:0004672
Vung53751|c0_g1_i7	Vigun09g278400	Vigun09g278400.1	(1 of 2) PTHR10177:SF250 - CYCLIN-B2-3-RELATED	3227	Vu09	43797946	43801172	PF02984,PF00134	PTHR10177,PTHR10177:SF250	0	K05868	GO:0005634
Vung77343|c6_g2_i1	Vigun01g139100	Vigun01g139100.1	(1 of 3) 3.1.1.26//3.1.1.3//3.1.1.32 - Galactolipase // Triacylglycerol lipase / Triglyceride lipase // Phospholipase A(1) / Phospholipase A1	3910	Vu01	31944144	31948053	PF01764	PTHR31403,PTHR31403:SF7	3.1.1.32,3.1.1.26,3.1.1.3	0	GO:0006629
Vung49300|c0_g1_i14	Vigun09g089400	Vigun09g089400.1	(1 of 1) PTHR15217//PTHR15217:SF0 - WILMS' TUMOR 1-ASSOCIATING PROTEIN // PRE-MRNA-SPLICING REGULATOR WTAP	15504	Vu09	12327720	12343223	PF17098	PTHR15217,PTHR15217:SF0	0	0	GO:0048024,GO:0005634
Vung28762|c0_g1_i3	Vigun06g001300	Vigun06g001300.1	(1 of 2) K01761 - methionine-gamma-lyase (E4.4.1.11)	2044	Vu06	630605	632648	PF00155	PTHR11808,PTHR11808:SF55	4.4.1.11	K01761	GO:0030170,GO:0009058
Vung93538|c3_g1_i1	Vigun03g311300	Vigun03g311300.1	(1 of 2) PTHR11206:SF127 - MATE EFFLUX FAMILY PROTEIN	2542	Vu03	50420014	50422555	PF01554	PTHR11206,PTHR11206:SF127	0	K03327	GO:0055085,GO:0016020,GO:0015297,GO:0015238,GO:0006855
Vung138817|c0_g1_i1	Vigun03g157500	Vigun03g157500.1	(1 of 1) PTHR30540//PTHR30540:SF5 - OSMOTIC STRESS POTASSIUM TRANSPORTER // SUBFAMILY NOT NAMED	3791	Vu03	17017328	17021118	PF02705	PTHR30540,PTHR30540:SF5	0	K03549	GO:0071805,GO:0016020,GO:0015079
Vung128603|c0_g2_i1	Vigun06g083000	Vigun06g083000.1	(1 of 8) 2.3.1.162 - Taxadien-5-alpha-ol O-acetyltransferase / Taxadienol acetyltransferase	1780	Vu06	21456161	21457940	PF02458	PTHR31147,PTHR31147:SF9	2.3.1.162	0	GO:0016747
Vung144868|c2_g2_i2	Vigun10g044700	Vigun10g044700.1	(1 of 2) K17961 - cytochrome P450, family 82, subfamily G, polypeptide 1 (CYP82G1)	3929	Vu10	6509778	6513706	PF00067	PTHR24298,PTHR24298:SF74	0	K17961	GO:0055114,GO:0020037,GO:0016705,GO:0005506
Vung140689|c0_g1_i2	Vigun07g214700	Vigun07g214700.3	(1 of 190) PF00847 - AP2 domain (AP2)	3112	Vu07	33588967	33592078	PF00847	PTHR31190	0	0	GO:0006355,GO:0003700
Vung159207|c1_g2_i12	Vigun01g043100	Vigun01g043100.1	(1 of 2) 3.2.1.119 - Vicianin beta-glucosidase	6393	Vu01	6078816	6085208	PF00232	PTHR10353,PTHR10353:SF44	3.2.1.119	K01188	GO:0005975,GO:0004553
Vung71449|c0_g1_i6	Vigun08g049500	Vigun08g049500.2	(1 of 2) PTHR23315//PTHR23315:SF59 - BETA CATENIN-RELATED ARMADILLO REPEAT-CONTAINING // ARMADILLO/BETA-CATENIN-LIKE REPEAT-CONTAINING PROTEIN-RELATED	7205	Vu08	5546862	5554066	0	PTHR23315,PTHR23315:SF59	6.3.2.19	0	0
Vung96681|c0_g1_i12	Vigun03g036700	Vigun03g036700.1	(1 of 1) PTHR22298:SF19 - ENDOGLUCANASE 19-RELATED	5145	Vu03	2812187	2817331	PF09478,PF00759	PTHR22298,PTHR22298:SF19	3.2.1.4	0	GO:0030246,GO:0005975,GO:0004553
Vung8046|c0_g1_i4	Vigun02g144200	Vigun02g144200.1	(1 of 3) PTHR21493//PTHR21493:SF142 - CGI-141-RELATED/LIPASE CONTAINING PROTEIN // SUBFAMILY NOT NAMED	4241	Vu02	29238264	29242504	PF01764	PTHR21493,PTHR21493:SF142	3.1.1.3	0	GO:0006629
Vung19032|c0_g2_i6	Vigun05g215300	Vigun05g215300.1	(1 of 2) PTHR31805//PTHR31805:SF3 - FAMILY NOT NAMED // PROLINE-RICH PROTEIN-RELATED	2906	Vu05	40720954	40723859	PF07223	PTHR31805,PTHR31805:SF3	0	0	0
Vung129837|c0_g1_i2	Vigun01g040300	Vigun01g040300.1	(1 of 4) PTHR27000:SF151 - DNA-DAMAGE-REPAIR/TOLERATION PROTEIN DRT100-RELATED	1926	Vu01	5580467	5582392	PF08263,PF13855	PTHR27000,PTHR27000:SF151	3.2.1.15	0	GO:0005515
Vung141406|c0_g2_i1	Vigun03g037600	Vigun03g037600.1	(1 of 1) K09273 - upstream-binding transcription factor (UBTF)	2728	Vu03	2874078	2876805	PF00505	PTHR13711,PTHR13711:SF228	0	K09273	0
Vung89847|c3_g3_i5	Vigun03g321900	Vigun03g321900.1	(1 of 40) PF03080 - Domain of unknown function (DUF239) (DUF239)	4248	Vu03	51757155	51761402	PF14365,PF03080	PTHR31589,PTHR31589:SF20	0	0	0
Vung15348|c0_g2_i4	Vigun09g116300	Vigun09g116300.1	(1 of 1) KOG4477 - RING1 interactor RYBP and related Zn-finger-containing proteins	5803	Vu09	25440947	25446749	PF03141	PTHR10108,PTHR10108:SF926	3.4.19.12,3.4.22.69	0	GO:0008168
Vung156830|c0_g2_i1	Vigun09g251500	Vigun09g251500.1	(1 of 4) PTHR32208//PTHR32208:SF19 - FAMILY NOT NAMED // F14L17.20 PROTEIN	2269	Vu09	41855572	41857840	PF09118,PF07250	PTHR32208,PTHR32208:SF19	1.1.3.9	0	0
Vung70149|c1_g1_i7	Vigun03g033300	Vigun03g033300.1	(1 of 2) K09490 - heat shock 70kDa protein 5 (HSPA5, BIP)	4364	Vu03	2563282	2567645	PF00012	PTHR19375,PTHR19375:SF228	0	K09490	0
Vung73294|c0_g2_i1	Vigun03g316500	Vigun03g316500.1	(1 of 1) PTHR22835//PTHR22835:SF231 - ZINC FINGER FYVE DOMAIN CONTAINING PROTEIN // SUBFAMILY NOT NAMED	1818	Vu03	51039672	51041489	PF00657	PTHR22835,PTHR22835:SF231	3.1.1.49	0	GO:0016788
Vung153864|c0_g1_i1	Vigun05g192000	Vigun05g192000.1	(1 of 4) PTHR33021:SF45 - EARLY NODULIN-LIKE PROTEIN 3-RELATED	1861	Vu05	37298090	37299950	PF02298	PTHR33021,PTHR33021:SF45	0	0	GO:0009055
Vung76418|c1_g1_i7	Vigun01g140000	Vigun01g140000.1	(1 of 4) K13407 - fatty acid omega-hydroxylase (CYP94A1)	1685	Vu01	32065645	32067329	PF00067	PTHR24296,PTHR24296:SF11	0	K13407	GO:0055114,GO:0020037,GO:0016705,GO:0005506
Vung128398|c0_g4_i11	Vigun03g399500	Vigun03g399500.1	(1 of 9) K13464 - jasmonate ZIM domain-containing protein (JAZ)	2812	Vu03	60595022	60597833	PF09425,PF06200	PTHR33077	0	K13464	0
Vung93502|c2_g1_i8	Vigun05g061900	Vigun05g061900.1	(1 of 2) PTHR31339:SF12 - POLYGALACTURONASE-LIKE PROTEIN	3619	Vu05	5335052	5338670	PF12708	PTHR31339,PTHR31339:SF12	0	0	0
Vung118133|c0_g3_i1	Vigun07g256800	Vigun07g256800.1	(1 of 1) 3.1.1.72 - Acetylxylan esterase	2109	Vu07	37434975	37437083	PF03629	PTHR31988,PTHR31988:SF2	3.1.1.72	0	0
Vung101893|c2_g2_i3	Vigun08g085400	Vigun08g085400.1	(1 of 2) PTHR31645:SF8 - METAL-NICOTIANAMINE TRANSPORTER YSL3	4129	Vu08	18724605	18728733	PF03169	PTHR31645,PTHR31645:SF8	0	0	GO:0055085
Vung47977|c0_g1_i4	Vigun03g155100	Vigun03g155100.1	(1 of 6) K17710 - pentatricopeptide repeat domain-containing protein 1 (PTCD1)	5010	Vu03	16497545	16502554	PF01535,PF13041	PTHR24015,PTHR24015:SF329	0	K17710	0
Vung48304|c1_g1_i4	Vigun11g108500	Vigun11g108500.1	(1 of 2) PTHR31901:SF10 - AUXIN-RESPONSIVE GH3 FAMILY PROTEIN	3599	Vu11	30848495	30852093	PF03321	PTHR31901,PTHR31901:SF10	0	K14487	0
Vung38314|c1_g1_i12	Vigun07g156300	Vigun07g156300.2	(1 of 2) PTHR31358//PTHR31358:SF4 - FAMILY NOT NAMED // PROTEIN WAVE-DAMPENED 2-RELATED	4207	Vu07	26717811	26722017	PF06886	PTHR31358,PTHR31358:SF4	0	0	0
Vung96681|c0_g1_i14	Vigun03g036700	Vigun03g036700.1	(1 of 1) PTHR22298:SF19 - ENDOGLUCANASE 19-RELATED	5145	Vu03	2812187	2817331	PF09478,PF00759	PTHR22298,PTHR22298:SF19	3.2.1.4	0	GO:0030246,GO:0005975,GO:0004553
Vung157293|c0_g1_i3	Vigun03g243700	Vigun03g243700.1	0	1666	Vu03	40613152	40614817	0	PTHR33672,PTHR33672:SF2	0	0	0
Vung70169|c1_g1_i2	Vigun06g127700	Vigun06g127700.1	(1 of 1) PTHR23177:SF24 - RHO GTPASE-ACTIVATING PROTEIN 3-RELATED	3604	Vu06	25449282	25452885	PF00786,PF00620	PTHR23177,PTHR23177:SF24	0	0	GO:0007165
Vung49385|c0_g2_i1	Vigun09g164800	Vigun09g164800.1	(1 of 1) PTHR11669:SF9 - REPLICATION FACTOR C SUBUNIT 5	9607	Vu09	33286722	33296328	PF00004,PF08542	PTHR11669,PTHR11669:SF9	0	K10756	GO:0005524
Vung130900|c0_g1_i2	Vigun07g192200	Vigun07g192200.2	(1 of 9) 1.14.13.152 - Geraniol 8-hydroxylase / G10H	2382	Vu07	31093692	31096073	PF00067	PTHR24298,PTHR24298:SF121	1.14.13.152	0	GO:0055114,GO:0020037,GO:0016705,GO:0005506
Vung154789|c0_g1_i14	Vigun06g177400	Vigun06g177400.2	(1 of 2) PTHR10217//PTHR10217:SF520 - VOLTAGE AND LIGAND GATED POTASSIUM CHANNEL // SUBFAMILY NOT NAMED	5016	Vu06	29764209	29769224	PF00027,PF07885,PF11834	PTHR10217,PTHR10217:SF520	0	0	0
Vung154789|c0_g1_i5	Vigun06g177400	Vigun06g177400.2	(1 of 2) PTHR10217//PTHR10217:SF520 - VOLTAGE AND LIGAND GATED POTASSIUM CHANNEL // SUBFAMILY NOT NAMED	5016	Vu06	29764209	29769224	PF00027,PF07885,PF11834	PTHR10217,PTHR10217:SF520	0	0	0
Vung154789|c0_g1_i7	Vigun06g177400	Vigun06g177400.2	(1 of 2) PTHR10217//PTHR10217:SF520 - VOLTAGE AND LIGAND GATED POTASSIUM CHANNEL // SUBFAMILY NOT NAMED	5016	Vu06	29764209	29769224	PF00027,PF07885,PF11834	PTHR10217,PTHR10217:SF520	0	0	0
Vung21164|c0_g1_i1	Vigun11g220800	Vigun11g220800.2	(1 of 101) PF02365 - No apical meristem (NAM) protein (NAM)	4340	Vu11	41298288	41302627	PF02365	PTHR31989,PTHR31989:SF3	0	0	GO:0006355,GO:0003677
Vung34941|c2_g3_i2	Vigun09g077600	Vigun09g077600.1	(1 of 2) PTHR24056//PTHR24056:SF196 - CELL DIVISION PROTEIN KINASE // SUBFAMILY NOT NAMED	7307	Vu09	8898965	8906271	PF00069	PTHR24056,PTHR24056:SF196	2.7.11.22,2.7.11.23	0	GO:0006468,GO:0005524,GO:0004672
Vung134649|c1_g2_i13	Vigun01g117800	Vigun01g117800.1	(1 of 3) 2.7.4.8 - Guanylate kinase / Guanosine monophosphate kinase	4214	Vu01	29428768	29432981	PF00625	PTHR23117,PTHR23117:SF13	2.7.4.8	K00942	0
Vung120892|c0_g2_i11	Vigun03g176300	Vigun03g176300.1	(1 of 1) 6.2.1.20//6.2.1.3 - Long-chain-fatty-acid--[acyl-carrier-protein] ligase / Acyl-[acyl-carrier-protein] synthetase // Long-chain-fatty-acid--CoA ligase / Lignoceroyl-CoA synthase	12801	Vu03	21861278	21874078	PF00501	PTHR24096,PTHR24096:SF199	6.2.1.3,6.2.1.20	K01897	GO:0008152,GO:0003824
Vung142615|c0_g1_i2	Vigun09g043400	Vigun09g043400.1	(1 of 3) PTHR31707:SF10 - PECTINESTERASE/PECTINESTERASE INHIBITOR 32-RELATED	3509	Vu09	4056595	4060103	PF04043,PF01095	PTHR31707,PTHR31707:SF10	3.1.1.11	K01051	GO:0004857,GO:0042545,GO:0030599,GO:0005618
Vung144479|c0_g1_i1	Vigun10g192600	Vigun10g192600.1	0	1647	Vu10	40691315	40692961	0	PTHR33915	0	0	0
Vung54410|c0_g2_i3	Vigun08g127100	Vigun08g127100.1	(1 of 3) K01230 - mannosyl-oligosaccharide alpha-1,2-mannosidase (MAN1)	8736	Vu08	29727434	29736169	PF01532	PTHR11742,PTHR11742:SF42	3.2.1.113	K01230	GO:0016020,GO:0005509,GO:0004571
Vung43287|c0_g1_i1	Vigun10g080600	Vigun10g080600.1	(1 of 2) PTHR35499//PTHR35499:SF2 - FAMILY NOT NAMED // ALC-INTERACTING PROTEIN 1	2219	Vu10	22491511	22493729	PF14383	PTHR35499,PTHR35499:SF2	0	0	0
Vung20291|c0_g1_i1	Vigun09g273300	Vigun09g273300.1	(1 of 34) PF01190 - Pollen proteins Ole e I like (Pollen_Ole_e_I)	2108	Vu09	43426985	43429092	PF01190	PTHR33210,PTHR33210:SF2	0	0	0
Vung160430|c0_g1_i1	Vigun05g263600	Vigun05g263600.1	(1 of 4) PTHR27000:SF151 - DNA-DAMAGE-REPAIR/TOLERATION PROTEIN DRT100-RELATED	1573	Vu05	45607909	45609481	PF08263,PF00560,PF13855	PTHR27000,PTHR27000:SF151	3.2.1.15	0	GO:0005515
Vung42987|c0_g1_i1	Vigun11g202500	Vigun11g202500.1	(1 of 1) PTHR31403//PTHR31403:SF6 - FAMILY NOT NAMED // PHOSPHOLIPASE A1-IGAMMA3, CHLOROPLASTIC	1557	Vu11	40041846	40043402	PF01764	PTHR31403,PTHR31403:SF6	3.1.1.32,3.1.1.26,3.1.1.3	0	GO:0006629
Vung159447|c2_g3_i6	Vigun08g102900	Vigun08g102900.1	(1 of 3) 2.5.1.54 - 3-deoxy-7-phosphoheptulonate synthase / Phospho-2-oxo-3-deoxyheptonate aldolase	5714	Vu08	25550639	25556352	PF01474	PTHR21337,PTHR21337:SF7	2.5.1.54	K01626	GO:0009073,GO:0003849
Vung15846|c0_g1_i3	Vigun05g056600	Vigun05g056600.1	0	1740	Vu05	4838097	4839836	0	PTHR33786,PTHR33786:SF2	0	0	0
Vung4603|c0_g2_i1	Vigun03g338500	Vigun03g338500.1	(1 of 2) PTHR24056//PTHR24056:SF196 - CELL DIVISION PROTEIN KINASE // SUBFAMILY NOT NAMED	5036	Vu03	53657957	53662992	PF00069	PTHR24056,PTHR24056:SF196	2.7.11.22,2.7.11.23	0	GO:0006468,GO:0005524,GO:0004672
Vung37422|c0_g1_i4	Vigun11g152700	Vigun11g152700.1	(1 of 6) PF06136 - Domain of unknown function (DUF966) (DUF966)	4646	Vu11	36245707	36250352	PF06136	PTHR31083,PTHR31083:SF4	0	0	0
Vung161372|c1_g1_i1	Vigun08g126200	Vigun08g126200.1	(1 of 2) PTHR32044//PTHR32044:SF13 - FAMILY NOT NAMED // XYLOGLUCAN GLYCOSYLTRANSFERASE 5-RELATED	4066	Vu08	29628061	29632126	PF13632	PTHR32044,PTHR32044:SF13	2.4.2.39,2.4.1.168	0	0
Vung38005|c5_g4_i4	Vigun10g037400	Vigun10g037400.1	(1 of 45) PF00931//PF13676 - NB-ARC domain (NB-ARC) // TIR domain (TIR_2)	6521	Vu10	5078611	5085131	PF13676,PF00931	PTHR11017,PTHR11017:SF163	0	0	GO:0007165,GO:0005515,GO:0043531
Vung114734|c2_g3_i7	Vigun11g045200	Vigun11g045200.1	(1 of 2) PTHR10791//PTHR10791:SF57 - RAG1-ACTIVATING PROTEIN 1 // SUBFAMILY NOT NAMED	2092	Vu11	6779961	6782052	PF03083	PTHR10791,PTHR10791:SF57	0	K15382	0
Vung134188|c0_g1_i7	Vigun01g237000	Vigun01g237000.1	0	4981	Vu01	40820750	40825730	0	PTHR34064,PTHR34064:SF5	0	0	0
Vung65632|c0_g1_i1	Vigun08g218100	Vigun08g218100.1	(1 of 5) PF03188//PF04526 - Eukaryotic cytochrome b561 (Cytochrom_B561) // Protein of unknown function (DUF568) (DUF568)	1964	Vu08	37792897	37794860	PF03188,PF04526	PTHR23130,PTHR23130:SF60	0	0	GO:0016021
Vung82704|c3_g1_i20	Vigun02g157200	Vigun02g157200.1	(1 of 2) PTHR11200:SF107 - TYPE I INOSITOL 1,4,5-TRISPHOSPHATE 5-PHOSPHATASE 2	5595	Vu02	30333018	30338612	PF03372	PTHR11200,PTHR11200:SF107	3.1.3.56	0	0
Vung118286|c0_g1_i1	Vigun03g278000	Vigun03g278000.1	(1 of 2) PTHR24361:SF334 - MITOGEN-ACTIVATED PROTEIN KINASE KINASE KINASE 19-RELATED	1843	Vu03	45557248	45559090	PF00069	PTHR24361,PTHR24361:SF334	2.7.11.25	0	GO:0006468,GO:0005524,GO:0004672
Vung39417|c0_g1_i2	Vigun02g199200	Vigun02g199200.1	(1 of 42) PF01657//PF07714 - Salt stress response/antifungal (Stress-antifung) // Protein tyrosine kinase (Pkinase_Tyr)	2993	Vu02	33395091	33398083	PF01657,PF07714	PTHR27002,PTHR27002:SF123	2.7.11.1	0	GO:0006468,GO:0004672
Vung4131|c1_g6_i6	Vigun01g091000	Vigun01g091000.1	(1 of 2) K12591 - exosome complex exonuclease RRP6 (RRP6, EXOSC10)	25770	Vu01	25148137	25173906	PF08066,PF00570,PF01612	PTHR12124,PTHR12124:SF47	3.1.13.5	K12591	GO:0006396,GO:0000176,GO:0005622,GO:0003676,GO:0008408,GO:0006139
Vung105741|c0_g1_i1	Vigun03g448400	Vigun03g448400.1	(1 of 1) PTHR24298//PTHR24298:SF54 - FAMILY NOT NAMED // CYTOCHROME P450 LIKE PROTEIN	1521	Vu03	64944835	64946355	PF00067	PTHR24298,PTHR24298:SF54	0	K00517	GO:0055114,GO:0020037,GO:0016705,GO:0005506
Vung44034|c0_g1_i2	Vigun08g013300	Vigun08g013300.1	(1 of 1) 2.1.1.141 - Jasmonate O-methyltransferase / Jasmonic acid carboxyl methyltransferase	2275	Vu08	1141258	1143532	PF03492	PTHR31009,PTHR31009:SF5	2.1.1.141	K08241	GO:0008168
Vung137989|c0_g1_i4	Vigun03g333100	Vigun03g333100.1	(1 of 2) PTHR11743//PTHR11743:SF35 - VOLTAGE-DEPENDENT ANION-SELECTIVE CHANNEL // SUBFAMILY NOT NAMED	2937	Vu03	53109257	53112193	PF01459	PTHR11743,PTHR11743:SF35	0	K15040	GO:0055085,GO:0005741
Vung81686|c0_g1_i4	Vigun03g179100	Vigun03g179100.1	(1 of 2) PTHR32285:SF15 - PROTEIN TRICHOME BIREFRINGENCE-LIKE 37-RELATED	3197	Vu03	22457471	22460667	PF14416,PF13839	PTHR32285,PTHR32285:SF15	0	0	0
Vung9398|c0_g1_i1	Vigun06g036500	Vigun06g036500.1	(1 of 1) PTHR22835//PTHR22835:SF131 - ZINC FINGER FYVE DOMAIN CONTAINING PROTEIN // SUBFAMILY NOT NAMED	3134	Vu06	15121682	15124815	PF00657	PTHR22835,PTHR22835:SF131	3.1.1.3	0	GO:0016788
Vung152990|c0_g1_i6	Vigun05g276000	Vigun05g276000.1	(1 of 5) PTHR23421//PTHR23421:SF74 - BETA-GALACTOSIDASE RELATED // BETA-GALACTOSIDASE 1	5966	Vu05	46605061	46611026	PF02140,PF01301	PTHR23421,PTHR23421:SF74	3.2.1.23	0	GO:0030246,GO:0005975,GO:0004553
Vung56740|c0_g1_i1	Vigun03g030400	Vigun03g030400.1	(1 of 2) 3.5.4.5 - Cytidine deaminase / Cytosine nucleoside deaminase	1564	Vu03	2289301	2290864	PF00383,PF08211	PTHR11644,PTHR11644:SF2	3.5.4.5	K01489	GO:0008270,GO:0009972,GO:0004126
Vung103273|c0_g3_i3	Vigun05g249600	Vigun05g249600.1	(1 of 1) 3.2.1.145//3.2.1.23 - Galactan 1,3-beta-galactosidase // Beta-galactosidase / Lactase	6630	Vu05	44339927	44346556	PF02140,PF01301	PTHR23421,PTHR23421:SF58	3.2.1.145,3.2.1.23	0	GO:0030246,GO:0005975,GO:0004553
Vung135886|c2_g2_i3	Vigun08g151700	Vigun08g151700.1	(1 of 1) 2.7.7.22 - Mannose-1-phosphate guanylyltransferase (GDP) / GDP-mannose pyrophosphorylase	3072	Vu08	32443373	32446444	PF00132,PF12804	PTHR22572,PTHR22572:SF108	2.7.7.22,2.7.7.13	K00966	0
Vung122912|c0_g1_i17	Vigun03g344300	Vigun03g344300.1	(1 of 1) PTHR12565:SF153 - TRANSCRIPTION FACTOR BIM1	7313	Vu03	54345533	54352845	PF00010	PTHR12565,PTHR12565:SF153	0	0	GO:0046983
Vung132848|c0_g1_i11	Vigun09g019800	Vigun09g019800.1	(1 of 1) 3.5.3.9 - Allantoate deiminase	4335	Vu09	1511229	1515563	PF07687,PF01546	PTHR32494,PTHR32494:SF7	3.5.3.9	K02083	GO:0016787,GO:0008152
Vung16156|c0_g1_i3	Vigun08g055000	Vigun08g055000.1	0	3556	Vu08	6739991	6743546	0	PTHR31182,PTHR31182:SF5	0	0	0
Vung90978|c0_g1_i2	Vigun03g357900	Vigun03g357900.1	(1 of 5) PTHR33021//PTHR33021:SF55 - FAMILY NOT NAMED // BLUE COPPER PROTEIN	1874	Vu03	55979453	55981326	PF02298	PTHR33021,PTHR33021:SF55	0	0	GO:0009055
Vung145036|c0_g4_i2	Vigun01g124300	Vigun01g124300.1	(1 of 2) 1.14.19.6 - Delta(12)-fatty-acid desaturase / Oleoyl-CoA Delta(12) desaturase	5902	Vu01	30120172	30126073	PF11960,PF00487	PTHR32100,PTHR32100:SF13	1.14.19.6,1.3.1.35	K10256	GO:0055114,GO:0016717,GO:0006629
Vung152265|c0_g2_i1	Vigun01g202200	Vigun01g202200.1	(1 of 108) PF02458 - Transferase family (Transferase)	1731	Vu01	37835879	37837609	PF02458	PTHR31147,PTHR31147:SF1	0	0	GO:0016747
Vung136288|c0_g1_i1	Vigun07g083000	Vigun07g083000.1	(1 of 2) PTHR12542//PTHR12542:SF38 - EXOCYST COMPLEX PROTEIN EXO70 // EXOCYST SUBUNIT EXO70 FAMILY PROTEIN-RELATED	2504	Vu07	12125536	12128039	PF03081	PTHR12542,PTHR12542:SF38	0	K07195	GO:0006887,GO:0000145
Vung79696|c0_g2_i2	Vigun04g165900	Vigun04g165900.1	(1 of 2) PTHR27000//PTHR27000:SF84 - FAMILY NOT NAMED // LRR RECEPTOR-LIKE SERINE/THREONINE-PROTEIN KINASE ERL1-RELATED	7861	Vu04	39040728	39048588	PF08263,PF00560,PF13855,PF00069	PTHR27000,PTHR27000:SF84	2.7.11.1	0	GO:0005515,GO:0006468,GO:0005524,GO:0004672
Vung127749|c0_g1_i1	Vigun10g180300	Vigun10g180300.1	(1 of 1) PTHR10071:SF197 - GATA TRANSCRIPTION FACTOR 9	1662	Vu10	39834766	39836427	PF00320	PTHR10071,PTHR10071:SF197	0	0	GO:0043565,GO:0008270,GO:0006355,GO:0003700
Vung161073|c0_g1_i11	Vigun10g195300	Vigun10g195300.1	(1 of 1) PTHR10366//PTHR10366:SF404 - NAD DEPENDENT EPIMERASE/DEHYDRATASE // SUBFAMILY NOT NAMED	2371	Vu10	40886642	40889012	PF01073	PTHR10366,PTHR10366:SF404	1.2.1.44	K09753	GO:0055114,GO:0016616,GO:0006694,GO:0003854
Vung149229|c0_g1_i2	Vigun11g120700	Vigun11g120700.1	(1 of 3) K09503 - DnaJ homolog subfamily A member 2 (DNAJA2)	2936	Vu11	32693775	32696710	PF00684,PF00226,PF01556	PTHR24078,PTHR24078:SF237	0	K09503	GO:0051082,GO:0031072
Vung102006|c1_g1_i5	Vigun08g148300	Vigun08g148300.1	(1 of 1) K10838 - xeroderma pigmentosum group C-complementing protein (XPC)	7818	Vu08	32088312	32096129	PF01841,PF10404,PF10403,PF03835,PF10405	PTHR12135,PTHR12135:SF0	0	K10838	GO:0003677,GO:0006289,GO:0005634,GO:0003684
Vung159081|c0_g1_i2	Vigun02g029300	Vigun02g029300.1	(1 of 4) PF06880 - Protein of unknown function (DUF1262) (DUF1262)	1776	Vu02	12205281	12207056	PF06880	PTHR31050,PTHR31050:SF2	0	0	0
Vung65152|c2_g2_i5	Vigun07g171500	Vigun07g171500.1	(1 of 2) PTHR10641//PTHR10641:SF650 - MYB-LIKE DNA-BINDING PROTEIN MYB // SUBFAMILY NOT NAMED	2349	Vu07	28682301	28684649	PF00249	PTHR10641,PTHR10641:SF650	0	K09422	0
Vung160763|c0_g1_i4	Vigun07g063400	Vigun07g063400.1	(1 of 2) PTHR10209//PTHR10209:SF152 - OXIDOREDUCTASE, 2OG-FE II OXYGENASE FAMILY PROTEIN // 1-AMINOCYCLOPROPANE-1-CARBOXYLATE OXIDASE-RELATED	2864	Vu07	7327366	7330229	PF14226,PF03171	PTHR10209,PTHR10209:SF152	1.14.11.9	0	GO:0055114,GO:0016491
Vung50795|c1_g1_i3	Vigun05g060600	Vigun05g060600.1	(1 of 2) K13425 - WRKY transcription factor 22 (WRKY22)	1956	Vu05	5184181	5186136	PF03106	PTHR32096,PTHR32096:SF31	0	K13425	GO:0043565,GO:0006355,GO:0003700
Vung109570|c0_g3_i2	Vigun09g126200	Vigun09g126200.1	(1 of 84) PF00892 - EamA-like transporter family (EamA)	3840	Vu09	27978054	27981893	PF00892	PTHR31218,PTHR31218:SF15	0	0	GO:0016021,GO:0016020,GO:0022857
Vung113817|c4_g2_i2	Vigun03g222900	Vigun03g222900.7	(1 of 3) PTHR10694:SF33 - TRANSCRIPTION FACTOR JUMONJI (JMJ) FAMILY PROTEIN / ZINC FINGER (C5HC2 TYPE) FAMILY PROTEIN	12966	Vu03	37053378	37066343	PF02928,PF02375,PF02373	PTHR10694,PTHR10694:SF33	1.14.11.27	0	0
Vung14373|c0_g2_i2	Vigun02g142900	Vigun02g142900.1	(1 of 2) PTHR10265//PTHR10265:SF25 - CYCLIN-DEPENDENT KINASE INHIBITOR 1 // CYCLIN-DEPENDENT KINASE INHIBITOR 6	2167	Vu02	29144194	29146360	PF02234	PTHR10265,PTHR10265:SF25	0	0	GO:0007050,GO:0005634,GO:0004861
Vung41204|c0_g1_i1	Vigun03g260700	Vigun03g260700.1	(1 of 14) K11498 - centromeric protein E (CENPE)	6604	Vu03	42746810	42753413	PF11995,PF00225	PTHR24115,PTHR24115:SF450	3.6.4.4	K11498	GO:0008017,GO:0007018,GO:0005524,GO:0003777,GO:0005871
Vung150190|c0_g1_i2	Vigun03g448700	Vigun03g448700.1	(1 of 1) PTHR11132//PTHR11132:SF59 - SOLUTE CARRIER FAMILY 35 // SUBFAMILY NOT NAMED	4660	Vu03	64967817	64972476	PF03151	PTHR11132,PTHR11132:SF59	0	K15283	0
Vung129058|c1_g1_i5	Vigun08g034200	Vigun08g034200.1	(1 of 2) PTHR13018//PTHR13018:SF31 - PROBABLE MEMBRANE PROTEIN DUF221-RELATED // LIPASE/HYDROLASE	9678	Vu08	3189767	3199444	PF13967,PF02714	PTHR13018,PTHR13018:SF31	0	0	GO:0016020
Vung136249|c0_g4_i2	Vigun01g225500	Vigun01g225500.1	(1 of 2) PTHR19139:SF90 - AQUAPORIN PIP1-5-RELATED	1794	Vu01	39837682	39839475	PF00230	PTHR19139,PTHR19139:SF90	0	K09872	GO:0016020,GO:0006810,GO:0005215
Vung53644|c2_g4_i2	Vigun02g166300	Vigun02g166300.1	(1 of 2) 2.4.1.186 - Glycogenin glucosyltransferase / Priming glucosyltransferase	4362	Vu02	31038400	31042761	0	PTHR11183,PTHR11183:SF55	2.4.1.186	0	0
Vung162165|c0_g1_i1	Vigun05g040500	Vigun05g040500.1	(1 of 40) PF01357//PF03330 - Pollen allergen (Pollen_allerg_1) // Rare lipoprotein A (RlpA)-like double-psi beta-barrel (DPBB_1)	2894	Vu05	3287144	3290037	PF03330,PF01357	PTHR31867	0	0	0
Vung138454|c0_g1_i4	Vigun05g131100	Vigun05g131100.1	(1 of 9) 1.14.11.20 - Deacetoxyvindoline 4-hydroxylase / Desacetyoxyvindoline-17-hydroxylase	1686	Vu05	15247827	15249512	PF14226,PF03171	PTHR10209,PTHR10209:SF123	1.14.11.20	0	GO:0055114,GO:0016491
Vung62914|c0_g1_i2	Vigun09g017900	Vigun09g017900.1	(1 of 1) PTHR10044//PTHR10044:SF103 - INHIBITOR OF APOPTOSIS // SUBFAMILY NOT NAMED	3371	Vu09	1346312	1349682	PF13920	PTHR10044,PTHR10044:SF103	0	0	0
Vung28949|c1_g2_i2	Vigun02g153000	Vigun02g153000.1	(1 of 1) PTHR31923:SF4 - BSD DOMAIN-CONTAINING PROTEIN	3181	Vu02	29945729	29948909	PF03909	PTHR31923,PTHR31923:SF4	0	0	0
Vung5012|c0_g1_i1	Vigun03g077000	Vigun03g077000.1	(1 of 1) PTHR15139 - TUBULIN FOLDING COFACTOR C	1463	Vu03	6378837	6380299	PF16752,PF07986	PTHR15139	0	0	GO:0007023
Vung40022|c0_g1_i1	Vigun09g034100	Vigun09g034100.1	(1 of 4) K03787 - 5'-nucleotidase (surE)	2393	Vu09	2986089	2988481	PF01975	PTHR30457,PTHR30457:SF5	3.1.3.5	K03787	GO:0016787
Vung59698|c1_g2_i11	Vigun03g333500	Vigun03g333500.1	(1 of 1) K17602 - YLP motif-containing protein 1 (YLPM1)	8598	Vu03	53134854	53143451	0	PTHR13413,PTHR13413:SF0	0	K17602	GO:0005634
Vung100582|c1_g1_i1	Vigun05g089500	Vigun05g089500.1	(1 of 58) PF03514 - GRAS domain family (GRAS)	1380	Vu05	8582511	8583890	PF03514	PTHR31636,PTHR31636:SF5	0	0	0
Vung144641|c0_g1_i1	Vigun06g110800	Vigun06g110800.1	(1 of 16) PF05910 - Plant protein of unknown function (DUF868) (DUF868)	1505	Vu06	23969268	23970772	PF05910	PTHR31972,PTHR31972:SF6	0	0	0
Vung143213|c0_g1_i1	Vigun08g160900	Vigun08g160900.1	(1 of 2) PF00069//PF13540 - Protein kinase domain (Pkinase) // Regulator of chromosome condensation (RCC1) repeat (RCC1_2)	3211	Vu08	33319616	33322826	PF13540,PF00069	PTHR27003,PTHR27003:SF102	2.7.11.1	0	GO:0006468,GO:0005524,GO:0004672
Vung10817|c0_g1_i1	Vigun05g240000	Vigun05g240000.1	(1 of 2) PTHR21022//PTHR21022:SF5 - PREPHENATE DEHYDRATASE P PROTEIN // SUBFAMILY NOT NAMED	1995	Vu05	43303408	43305402	PF00800	PTHR21022,PTHR21022:SF5	4.2.1.91	K05359	GO:0009094,GO:0004664
Vung85788|c0_g1_i1	Vigun02g197300	Vigun02g197300.1	(1 of 1) PTHR23024//PTHR23024:SF196 - MEMBER OF 'GDXG' FAMILY OF LIPOLYTIC ENZYMES // SUBFAMILY NOT NAMED	3339	Vu02	33228047	33231385	PF00135	PTHR23024,PTHR23024:SF196	4.2.1.105,3.1.1.1	0	0
Vung151946|c1_g1_i1	Vigun01g126500	Vigun01g126500.1	0	8031	Vu01	30353518	30361548	0	PTHR16897	0	0	0
Vung47112|c0_g1_i1	Vigun05g143100	Vigun05g143100.1	0	1616	Vu05	18802808	18804423	0	0	0	0	0
Vung137089|c4_g6_i1	Vigun10g177600	Vigun10g177600.1	(1 of 2) PTHR22835//PTHR22835:SF170 - ZINC FINGER FYVE DOMAIN CONTAINING PROTEIN // SUBFAMILY NOT NAMED	1826	Vu10	39607059	39608884	PF00657	PTHR22835,PTHR22835:SF170	3.1.1.3	0	GO:0016788
Vung119899|c3_g5_i2	Vigun05g258800	Vigun05g258800.1	(1 of 4) PTHR31867//PTHR31867:SF9 - FAMILY NOT NAMED // EXPANSIN-A6	1610	Vu05	45255486	45257095	PF03330,PF01357	PTHR31867,PTHR31867:SF9	0	0	0
Vung38283|c0_g1_i1	Vigun06g161600	Vigun06g161600.1	(1 of 2) PTHR12447:SF7 - ANKYRIN REPEAT FAMILY PROTEIN	2742	Vu06	28390538	28393279	PF11904	PTHR12447,PTHR12447:SF7	0	0	0
Vung127742|c0_g1_i1	Vigun01g181500	Vigun01g181500.1	(1 of 2) PTHR10168//PTHR10168:SF74 - GLUTAREDOXIN // ELECTRON CARRIER/ PROTEIN DISULFIDE OXIDOREDUCTASE-RELATED	1392	Vu01	36243437	36244828	PF00462	PTHR10168,PTHR10168:SF74	0	K17479	GO:0045454,GO:0015035,GO:0009055
Vung20554|c2_g1_i4	Vigun09g014900	Vigun09g014900.1	(1 of 2) PTHR13832:SF309 - PROTEIN PHOSPHATASE 2C 40-RELATED	3878	Vu09	1102218	1106095	PF00481	PTHR13832,PTHR13832:SF309	3.1.3.16	K01102	GO:0003824,GO:0006470,GO:0004722
Vung1378|c4_g5_i1	Vigun08g221300	Vigun08g221300.3	(1 of 2) PTHR10766//PTHR10766:SF44 - TRANSMEMBRANE 9 SUPERFAMILY PROTEIN // ENDOMEMBRANE FAMILY PROTEIN 70	3925	Vu08	37981748	37985672	PF02990	PTHR10766,PTHR10766:SF44	0	K17086	GO:0016021
Vung65119|c2_g6_i2	Vigun02g046200	Vigun02g046200.1	(1 of 5) 5.4.99.30 - UDP-arabinopyranose mutase	3125	Vu02	18410270	18413394	PF03214	PTHR31682,PTHR31682:SF3	5.4.99.30	K13379	GO:0030244,GO:0016866
Vung154742|c0_g2_i2	Vigun05g151800	Vigun05g151800.1	(1 of 5) PTHR22835//PTHR22835:SF239 - ZINC FINGER FYVE DOMAIN CONTAINING PROTEIN // SUBFAMILY NOT NAMED	2673	Vu05	23374198	23376870	PF00657	PTHR22835,PTHR22835:SF239	3.2.1.51	0	GO:0016788
Vung163436|c3_g2_i8	Vigun03g221000	Vigun03g221000.1	(1 of 1) PTHR10426//PTHR10426:SF33 - STRICTOSIDINE SYNTHASE-RELATED // SUBFAMILY NOT NAMED	4565	Vu03	36752023	36756587	PF03088	PTHR10426,PTHR10426:SF33	4.3.3.2	0	GO:0016844,GO:0009058
Vung51173|c5_g1_i1	Vigun04g183800	Vigun04g183800.1	(1 of 5) PF01436 - NHL repeat (NHL)	4111	Vu04	40853245	40857355	0	PTHR13833,PTHR13833:SF54	0	0	0
Vung81738|c0_g1_i1	Vigun02g037300	Vigun02g037300.1	(1 of 3) 5.3.99.6 - Allene-oxide cyclase	1430	Vu02	15457908	15459337	PF06351	PTHR31843,PTHR31843:SF1	5.3.99.6	K10525	GO:0016853,GO:0009507
Vung104291|c0_g1_i5	Vigun04g038300	Vigun04g038300.1	(1 of 3) PTHR10766//PTHR10766:SF58 - TRANSMEMBRANE 9 SUPERFAMILY PROTEIN // SUBFAMILY NOT NAMED	4231	Vu04	3210681	3214911	PF02990	PTHR10766,PTHR10766:SF58	0	0	GO:0016021
Vung10205|c2_g3_i2	Vigun09g033900	Vigun09g033900.1	(1 of 2) K11279 - nucleosome assembly protein 1-like 1 (NAP1L1, NRP)	3268	Vu09	2970147	2973414	PF00956	PTHR11875,PTHR11875:SF73	0	K11279	GO:0006334,GO:0005634
Vung133594|c1_g1_i1	Vigun08g222200	Vigun08g222200.1	(1 of 3) PTHR11040:SF35 - ZINC TRANSPORTER 3-RELATED	3097	Vu08	38020005	38023101	PF02535	PTHR11040,PTHR11040:SF35	0	0	GO:0055085,GO:0046873,GO:0030001,GO:0016020
Vung32532|c3_g4_i15	Vigun07g296500	Vigun07g296500.2	(1 of 2) PTHR10997//PTHR10997:SF35 - IMPORTIN-7, 8, 11 // SUBFAMILY NOT NAMED	9970	Vu07	40673862	40683831	PF08506,PF03810	PTHR10997,PTHR10997:SF35	0	0	GO:0006886,GO:0008536
Vung5346|c0_g1_i3	Vigun05g216000	Vigun05g216000.1	(1 of 2) PTHR31692//PTHR31692:SF5 - FAMILY NOT NAMED // EXPANSIN-B1-RELATED	2698	Vu05	40797261	40799958	PF03330,PF01357	PTHR31692,PTHR31692:SF5	0	0	0
Vung102186|c2_g2_i5	Vigun03g170800	Vigun03g170800.3	(1 of 79) 3.6.3.44 - Xenobiotic-transporting ATPase / Steroid-transporting ATPase	6837	Vu03	20420731	20427567	PF00005,PF00664	PTHR24223,PTHR24223:SF222	3.6.3.44	0	GO:0016887,GO:0005524,GO:0055085,GO:0042626,GO:0016021,GO:0006810
Vung138657|c2_g1_i2	Vigun04g126600	Vigun04g126600.1	(1 of 3) 4.4.1.4 - Alliin lyase / L-cysteine sulfoxide lyase	3814	Vu04	31951264	31955077	PF04863,PF04864	PTHR11751,PTHR11751:SF126	4.4.1.4	0	GO:0016846
Vung35709|c0_g1_i2	Vigun02g066000	Vigun02g066000.1	(1 of 6) PTHR11654:SF20 - PROTEIN NRT1/ PTR FAMILY 2.12-RELATED	5295	Vu02	21567484	21572778	PF00854	PTHR11654,PTHR11654:SF20	0	0	GO:0016020,GO:0006810,GO:0005215
Vung89343|c0_g1_i1	Vigun01g011300	Vigun01g011300.1	(1 of 3) PTHR11527//PTHR11527:SF131 - SMALL HEAT-SHOCK PROTEIN HSP20 FAMILY // SUBFAMILY NOT NAMED	2759	Vu01	1266037	1268795	PF00011	PTHR11527,PTHR11527:SF131	0	0	0
Vung115541|c1_g5_i8	Vigun03g397200	Vigun03g397200.1	(1 of 2) PTHR22893//PTHR22893:SF67 - NADH OXIDOREDUCTASE-RELATED // 12-OXOPHYTODIENOATE REDUCTASE 3	2015	Vu03	60367807	60369821	PF00724	PTHR22893,PTHR22893:SF67	1.3.1.42	K05894	GO:0055114,GO:0016491,GO:0010181
Vung79488|c0_g2_i1	Vigun06g182400	Vigun06g182400.1	(1 of 2) PTHR10209//PTHR10209:SF176 - OXIDOREDUCTASE, 2OG-FE II OXYGENASE FAMILY PROTEIN // SUBFAMILY NOT NAMED	3782	Vu06	30200966	30204747	PF14226,PF03171	PTHR10209,PTHR10209:SF176	1.14.11.32	0	GO:0055114,GO:0016491
Vung98409|c0_g2_i1	Vigun03g104200	Vigun03g104200.1	(1 of 3) PTHR35274//PTHR35274:SF2 - FAMILY NOT NAMED // EXPRESSED PROTEIN-RELATED	1329	Vu03	9037365	9038693	0	PTHR35274,PTHR35274:SF2	0	0	0
Vung22486|c1_g1_i8	Vigun06g237500	Vigun06g237500.1	(1 of 4) K07874 - Ras-related protein Rab-1A (RAB1A)	3864	Vu06	34235065	34238928	PF00025	PTHR24073,PTHR24073:SF490	0	K07874	GO:0005525
Vung129517|c0_g1_i13	Vigun02g119300	Vigun02g119300.1	(1 of 2) PTHR31235//PTHR31235:SF67 - FAMILY NOT NAMED // PEROXIDASE 64	3664	Vu02	27200344	27204007	PF00141	PTHR31235,PTHR31235:SF67	1.11.1.7	K00430	GO:0055114,GO:0020037,GO:0006979,GO:0004601
Vung119858|c0_g3_i1	Vigun03g194700	Vigun03g194700.1	(1 of 2) PTHR32227//PTHR32227:SF85 - FAMILY NOT NAMED // GLYCOSYL HYDROLASES FAMILY PROTEIN	2554	Vu03	27312192	27314745	PF00332	PTHR32227,PTHR32227:SF85	3.2.1.39	0	GO:0005975,GO:0004553
Vung113776|c0_g1_i9	Vigun03g371900	Vigun03g371900.1	(1 of 1) PTHR10217:SF500 - CYCLIC NUCLEOTIDE-GATED ION CHANNEL 5-RELATED	8418	Vu03	57466193	57474610	PF00027,PF00520	PTHR10217,PTHR10217:SF500	0	K05391	GO:0055085,GO:0016020,GO:0006811,GO:0005216
Vung9809|c1_g1_i1	Vigun07g160100	Vigun07g160100.1	(1 of 40) PF03080 - Domain of unknown function (DUF239) (DUF239)	3366	Vu07	27192185	27195550	PF14365,PF03080	PTHR31589,PTHR31589:SF4	0	0	0
Vung58019|c0_g1_i1	Vigun08g160600	Vigun08g160600.1	(1 of 7) K05857 - phosphatidylinositol phospholipase C, delta (PLCD)	5645	Vu08	33295838	33301482	PF09279,PF00168,PF00387,PF00388	PTHR10336,PTHR10336:SF92	3.1.4.11	K05857	GO:0005515,GO:0035556,GO:0007165,GO:0006629,GO:0004435
Vung76107|c0_g1_i1	Vigun08g085800	Vigun08g085800.1	(1 of 7) PTHR31236//PTHR31236:SF2 - FAMILY NOT NAMED // DEHYDRATION-RESPONSIVE PROTEIN RD22	3112	Vu08	18975600	18978711	PF03181	PTHR31236,PTHR31236:SF2	0	0	0
Vung142448|c0_g1_i6	Vigun05g043700	Vigun05g043700.1	(1 of 9) PF03007//PF06974 - Wax ester synthase-like Acyl-CoA acyltransferase domain (WES_acyltransf) // Protein of unknown function (DUF1298) (DUF1298)	2796	Vu05	3623448	3626243	PF03007,PF06974	PTHR31650,PTHR31650:SF7	0	0	GO:0045017,GO:0004144
Vung15010|c0_g1_i8	Vigun04g019100	Vigun04g019100.1	(1 of 1) K09313 - homeobox protein cut-like (CUTL)	11996	Vu04	1417695	1429690	PF08172	PTHR14043	0	K09313	GO:0030173,GO:0006891
Vung77982|c0_g1_i1	Vigun08g033900	Vigun08g033900.1	(1 of 5) 1.14.13.132//1.14.99.7 - Squalene monooxygenase / Squalene epoxidase // Transferred entry: 1.14.13.132	4042	Vu08	3155871	3159912	PF01494	PTHR10835,PTHR10835:SF1	1.14.99.7,1.14.13.132	K00511	GO:0071949
Vung45798|c0_g2_i4	Vigun11g111700	Vigun11g111700.1	(1 of 8) PTHR10641//PTHR10641:SF584 - MYB-LIKE DNA-BINDING PROTEIN MYB // SUBFAMILY NOT NAMED	1472	Vu11	31357961	31359432	PF00249	PTHR10641,PTHR10641:SF584	0	K09422	0
Vung163462|c0_g1_i2	Vigun11g094700	Vigun11g094700.1	(1 of 28) PF03634 - TCP family transcription factor (TCP)	3748	Vu11	27714892	27718639	PF03634	PTHR31072,PTHR31072:SF13	0	0	0
Vung156309|c1_g2_i3	Vigun05g228000	Vigun05g228000.1	(1 of 92) PF03106 - WRKY DNA -binding domain (WRKY)	3115	Vu05	42098620	42101734	PF03106	PTHR31429,PTHR31429:SF10	0	0	GO:0043565,GO:0006355,GO:0003700
Vung135825|c0_g2_i2	Vigun02g120300	Vigun02g120300.1	(1 of 9) PTHR22835:SF184 - GDSL ESTERASE/LIPASE EXL1-RELATED	2900	Vu02	27288659	27291558	PF00657	PTHR22835,PTHR22835:SF184	3.1.1.3	0	GO:0016788
Vung23579|c0_g1_i1	Vigun03g027000	Vigun03g027000.1	(1 of 2) PTHR27000//PTHR27000:SF4 - FAMILY NOT NAMED // EXTENSIN-LIKE PROTEIN-RELATED	1263	Vu03	2014852	2016114	PF08263,PF13855	PTHR27000,PTHR27000:SF4	0	0	GO:0005515
Vung34621|c1_g1_i8	Vigun03g217800	Vigun03g217800.1	(1 of 2) PTHR24286//PTHR24286:SF10 - FAMILY NOT NAMED // ABSCISIC ACID 8'-HYDROXYLASE 1-RELATED	2611	Vu03	36266806	36269416	PF00067	PTHR24286,PTHR24286:SF10	1.14.13.93	0	GO:0055114,GO:0020037,GO:0016705,GO:0005506
Vung56743|c0_g2_i1	Vigun05g264400	Vigun05g264400.1	(1 of 1) PTHR11926//PTHR11926:SF392 - GLUCOSYL/GLUCURONOSYL TRANSFERASES // SUBFAMILY NOT NAMED	1974	Vu05	45650969	45652942	PF00201	PTHR11926,PTHR11926:SF392	0	0	GO:0016758,GO:0008152
Vung119899|c3_g3_i2	Vigun08g149300	Vigun08g149300.1	(1 of 4) PTHR31867//PTHR31867:SF9 - FAMILY NOT NAMED // EXPANSIN-A6	2044	Vu08	32154258	32156301	PF03330,PF01357	PTHR31867,PTHR31867:SF9	0	0	0
Vung101179|c0_g1_i4	Vigun11g173700	Vigun11g173700.1	(1 of 5) PTHR23500//PTHR23500:SF109 - FAMILY NOT NAMED // POLYOL TRANSPORTER 5	2359	Vu11	37891941	37894299	PF07690	PTHR23500,PTHR23500:SF109	0	0	GO:0055085,GO:0016021
Vung24311|c0_g2_i1	Vigun06g185600	Vigun06g185600.1	(1 of 3) PTHR19139:SF144 - AQUAPORIN NIP1-1-RELATED	2695	Vu06	30488310	30491004	PF00230	PTHR19139,PTHR19139:SF144	0	K09874	GO:0016020,GO:0006810,GO:0005215
Vung146206|c1_g2_i6	Vigun05g111100	Vigun05g111100.1	(1 of 13) PTHR13068:SF28 - MITOCHONDRIAL TRANSCRIPTION TERMINATION FACTOR FAMILY PROTEIN-RELATED	2661	Vu05	11573705	11576365	PF02536	PTHR13068,PTHR13068:SF28	0	K15032	GO:0006355,GO:0005739,GO:0003690
Vung37646|c0_g1_i4	Vigun06g012100	Vigun06g012100.1	(1 of 2) PTHR10572//PTHR10572:SF9 - 3-HYDROXY-3-METHYLGLUTARYL-COENZYME A REDUCTASE // 3-HYDROXY-3-METHYLGLUTARYL-COENZYME A REDUCTASE 1	4647	Vu06	5346799	5351445	PF00368	PTHR10572,PTHR10572:SF9	1.1.1.34	K00021	GO:0055114,GO:0050662,GO:0015936,GO:0004420
Vung58691|c2_g1_i3	Vigun01g233500	Vigun01g233500.2	(1 of 16) PF05701 - Weak chloroplast movement under blue light (WEMBL)	3247	Vu01	40527182	40530428	PF05701	PTHR32054,PTHR32054:SF13	0	0	0
Vung57673|c1_g1_i14	Vigun10g182500	Vigun10g182500.1	(1 of 1) K18660 - malonyl-CoA/methylmalonyl-CoA synthetase (ACSF3)	6550	Vu10	39975407	39981956	PF13193,PF00501	PTHR24095	6.2.1.3	K18660	GO:0008152,GO:0003824
Vung113986|c0_g2_i1	Vigun01g023100	Vigun01g023100.1	0	2275	Vu01	2453512	2455786	0	PTHR31852,PTHR31852:SF46	0	0	0
Vung53776|c2_g1_i1	Vigun05g042800	Vigun05g042800.1	(1 of 2) PTHR10641//PTHR10641:SF530 - MYB-LIKE DNA-BINDING PROTEIN MYB // SUBFAMILY NOT NAMED	1911	Vu05	3517093	3519003	PF00249	PTHR10641,PTHR10641:SF530	0	K09422	0
Vung41438|c0_g2_i5	Vigun03g438800	Vigun03g438800.2	(1 of 2) PTHR22814//PTHR22814:SF94 - COPPER TRANSPORT PROTEIN ATOX1-RELATED // SUBFAMILY NOT NAMED	5333	Vu03	64237562	64242894	PF00403	PTHR22814,PTHR22814:SF94	0	0	GO:0046872,GO:0030001
Vung70313|c2_g1_i4	Vigun01g005900	Vigun01g005900.1	(1 of 6) PTHR11926//PTHR11926:SF343 - GLUCOSYL/GLUCURONOSYL TRANSFERASES // UDP-GLYCOSYLTRANSFERASE 88A1	2440	Vu01	742384	744823	PF00201	PTHR11926,PTHR11926:SF343	0	0	GO:0016758,GO:0008152
Vung11315|c0_g1_i1	Vigun05g227700	Vigun05g227700.1	(1 of 3) PTHR12701//PTHR12701:SF18 - BCR-ASSOCIATED PROTEIN, BAP // 4D656-RELATED	2327	Vu05	42075478	42077804	PF05529	PTHR12701,PTHR12701:SF18	0	K14009	GO:0016021,GO:0006886,GO:0005783
Vung144200|c1_g1_i1	Vigun07g166700	Vigun07g166700.1	(1 of 24) PF03087 - Arabidopsis protein of unknown function (DUF241)	1218	Vu07	28124664	28125881	PF03087	PTHR31509,PTHR31509:SF18	0	0	0
Vung78210|c0_g1_i1	Vigun02g179100	Vigun02g179100.1	(1 of 2) PTHR31087:SF14 - PROTEIN LURP-ONE-RELATED 17	1357	Vu02	32022529	32023885	PF04525	PTHR31087,PTHR31087:SF14	0	0	0
Vung41793|c0_g1_i1	Vigun09g258900	Vigun09g258900.1	(1 of 24) PF03087 - Arabidopsis protein of unknown function (DUF241)	1687	Vu09	42429982	42431668	PF03087	PTHR33070,PTHR33070:SF14	0	0	0
Vung102822|c0_g5_i1	Vigun03g441000	Vigun03g441000.1	(1 of 2) 3.1.3.25//3.1.3.93 - Inositol-phosphate phosphatase / Myo-inositol-1-phosphatase // L-galactose 1-phosphate phosphatase	4784	Vu03	64368035	64372818	PF00459	PTHR20854,PTHR20854:SF4	3.1.3.93,3.1.3.25	K10047	GO:0046854
Vung5923|c1_g1_i1	Vigun05g243200	Vigun05g243200.1	(1 of 5) 5.3.3.17 - Trans-2,3-dihydro-3-hydroxyanthranilate isomerase	2642	Vu05	43633822	43636463	PF02567	PTHR13774,PTHR13774:SF17	5.3.3.17	0	GO:0009058,GO:0003824
Vung146668|c0_g1_i1	Vigun03g138900	Vigun03g138900.1	(1 of 4) PTHR27000//PTHR27000:SF136 - FAMILY NOT NAMED // POLYGALACTURONASE INHIBITOR 1-RELATED	1304	Vu03	13688176	13689479	PF08263	PTHR27000,PTHR27000:SF136	0	0	0
Vung46971|c0_g2_i1	Vigun09g263100	Vigun09g263100.1	(1 of 2) K16290 - xylem cysteine proteinase [EC:3.4.22.-] (XCP)	1499	Vu09	42756812	42758310	PF08246,PF00112	PTHR12411,PTHR12411:SF357	3.4.22.6	K16290	GO:0008234,GO:0006508
Vung131891|c0_g1_i1	Vigun03g040900	Vigun03g040900.1	(1 of 92) PF03106 - WRKY DNA -binding domain (WRKY)	1594	Vu03	3152812	3154405	PF03106	PTHR32096,PTHR32096:SF30	0	0	GO:0043565,GO:0006355,GO:0003700
Vung7440|c0_g1_i2	Vigun01g108000	Vigun01g108000.1	(1 of 1) 2.1.1.145 - Trans-aconitate 3-methyltransferase	1357	Vu01	28051001	28052357	PF08241	PTHR10108,PTHR10108:SF692	2.1.1.145	0	GO:0008168,GO:0008152
Vung62712|c0_g2_i4	Vigun03g180500	Vigun03g180500.1	(1 of 6) PF00106//PF13561 - short chain dehydrogenase (adh_short) // Enoyl-(Acyl carrier protein) reductase (adh_short_C2)	2448	Vu03	22811112	22813559	PF13561,PF00106	PTHR24322,PTHR24322:SF230	0	0	GO:0016491,GO:0008152
Vung44891|c0_g1_i1	Vigun01g088500	Vigun01g088500.2	0	3175	Vu01	24689992	24693166	0	0	0	0	0
Vung2402|c0_g1_i1	Vigun09g177300	Vigun09g177300.1	(1 of 16) PF11955 - Plant organelle RNA recognition domain (PORR)	1200	Vu09	34944217	34945416	PF11955	PTHR31476,PTHR31476:SF14	0	0	0
Vung155954|c0_g1_i2	Vigun01g048000	Vigun01g048000.1	(1 of 1) PTHR11489//PTHR11489:SF9 - 40S RIBOSOMAL PROTEIN SA // 40S RIBOSOMAL PROTEIN SA	3185	Vu01	7198516	7201700	PF00318	PTHR11489,PTHR11489:SF9	0	K02998	GO:0006412,GO:0005840,GO:0005622,GO:0003735,GO:0015935
Vung53884|c1_g2_i5	Vigun01g148800	Vigun01g148800.1	(1 of 2) PTHR33271//PTHR33271:SF3 - FAMILY NOT NAMED // CUPIN DOMAIN-CONTAINING PROTEIN	1382	Vu01	33029370	33030751	PF05899	PTHR33271,PTHR33271:SF3	0	0	0
Vung133555|c2_g1_i2	Vigun06g136200	Vigun06g136200.1	(1 of 3) K01187 - alpha-glucosidase (malZ)	3707	Vu06	26231923	26235629	PF13802,PF16863,PF01055	PTHR22762,PTHR22762:SF82	3.2.1.20	K01187	GO:0005975,GO:0004553
Vung149673|c0_g2_i21	Vigun09g181800	Vigun09g181800.1	(1 of 1) 4.3.2.1 - Argininosuccinate lyase / Omega-N-(L-arginino)succinate arginine-lyase	8153	Vu09	35549318	35557470	PF14698,PF00206	PTHR11444,PTHR11444:SF3	4.3.2.1	K01755	GO:0042450,GO:0004056
Vung159207|c1_g2_i5	Vigun01g043100	Vigun01g043100.2	(1 of 2) 3.2.1.119 - Vicianin beta-glucosidase	6393	Vu01	6078816	6085208	PF00232	PTHR10353,PTHR10353:SF44	3.2.1.119	0	GO:0005975,GO:0004553
Vung11953|c0_g1_i1	Vigun06g111200	Vigun06g111200.1	(1 of 2) PTHR21654//PTHR21654:SF22 - FAMILY NOT NAMED // TRIHELIX TRANSCRIPTION FACTOR GTL2	2684	Vu06	24012860	24015543	PF13837	PTHR21654,PTHR21654:SF22	0	0	0
Vung96681|c0_g1_i8	Vigun03g036700	Vigun03g036700.1	(1 of 1) PTHR22298:SF19 - ENDOGLUCANASE 19-RELATED	5145	Vu03	2812187	2817331	PF09478,PF00759	PTHR22298,PTHR22298:SF19	3.2.1.4	0	GO:0030246,GO:0005975,GO:0004553
Vung154320|c0_g2_i5	Vigun03g268000	Vigun03g268000.1	(1 of 3) PF06708 - Protein of unknown function (DUF1195) (DUF1195)	3286	Vu03	43898058	43901343	PF06708	PTHR34358,PTHR34358:SF2	0	0	0
Vung65000|c3_g3_i2	Vigun05g211500	Vigun05g211500.2	(1 of 2) PTHR24072//PTHR24072:SF167 - RHO FAMILY GTPASE // RAC-LIKE GTP-BINDING PROTEIN ARAC2	2642	Vu05	40239685	40242326	PF08477	PTHR24072,PTHR24072:SF167	0	K04392	GO:0007264,GO:0005525
Vung116532|c0_g1_i6	Vigun06g151600	Vigun06g151600.1	(1 of 2) PTHR22814//PTHR22814:SF94 - COPPER TRANSPORT PROTEIN ATOX1-RELATED // SUBFAMILY NOT NAMED	4185	Vu06	27607918	27612102	PF00403	PTHR22814,PTHR22814:SF94	0	0	GO:0046872,GO:0030001
Vung153373|c1_g1_i6	Vigun09g040200	Vigun09g040200.1	(1 of 2) PTHR33077:SF13 - PROTEIN TIFY 10A-RELATED	2461	Vu09	3619289	3621749	PF09425,PF06200	PTHR33077,PTHR33077:SF13	0	K13464	0
Vung70879|c1_g3_i3	Vigun11g066700	Vigun11g066700.5	(1 of 1) KOG0315//KOG0316 - G-protein beta subunit-like protein (contains WD40 repeats) // Conserved WD40 repeat-containing protein	18828	Vu11	16776911	16795738	0	PTHR14221,PTHR14221:SF0	0	0	0
Vung1378|c4_g8_i1	Vigun08g221300	Vigun08g221300.2	(1 of 2) PTHR10766//PTHR10766:SF44 - TRANSMEMBRANE 9 SUPERFAMILY PROTEIN // ENDOMEMBRANE FAMILY PROTEIN 70	3925	Vu08	37981748	37985672	PF02990	PTHR10766,PTHR10766:SF44	0	K17086	GO:0016021
Vung165624|c1_g2_i1	Vigun06g178100	Vigun06g178100.1	(1 of 2) PTHR10209//PTHR10209:SF171 - OXIDOREDUCTASE, 2OG-FE II OXYGENASE FAMILY PROTEIN // GIBBERELLIN 2-BETA-DIOXYGENASE 2-RELATED	2135	Vu06	29810307	29812441	PF14226,PF03171	PTHR10209,PTHR10209:SF171	1.14.11.13	K04125	GO:0055114,GO:0016491
Vung60392|c0_g2_i7	Vigun03g351600	Vigun03g351600.2	(1 of 2) PTHR10217:SF504 - POTASSIUM CHANNEL AKT1-RELATED	6472	Vu03	55312128	55318599	PF00027,PF12796,PF13857,PF11834,PF00520	PTHR10217,PTHR10217:SF504	0	0	GO:0055085,GO:0016020,GO:0006811,GO:0005216
Vung36090|c0_g1_i1	Vigun08g088300	Vigun08g088300.1	(1 of 7) PF05340 - Protein of unknown function (DUF740) (DUF740)	2180	Vu08	20058714	20060893	PF05340	PTHR35995	0	0	0
Vung61361|c1_g1_i1	Vigun04g095100	Vigun04g095100.1	(1 of 2) PTHR11802//PTHR11802:SF71 - SERINE PROTEASE FAMILY S10 SERINE CARBOXYPEPTIDASE // SERINE CARBOXYPEPTIDASE-LIKE 26-RELATED	4030	Vu04	19781053	19785082	PF00450	PTHR11802,PTHR11802:SF71	3.4.16.6	K16297	GO:0006508,GO:0004185
Vung63620|c2_g1_i10	Vigun03g283500	Vigun03g283500.2	(1 of 2) PTHR13683//PTHR13683:SF342 - ASPARTYL PROTEASES // SUBFAMILY NOT NAMED	7334	Vu03	46396876	46404209	PF00026	PTHR13683,PTHR13683:SF342	3.4.23.12	0	GO:0006508,GO:0004190
Vung111274|c0_g6_i2	Vigun03g093300	Vigun03g093300.1	(1 of 3) PTHR22835//PTHR22835:SF120 - ZINC FINGER FYVE DOMAIN CONTAINING PROTEIN // SUBFAMILY NOT NAMED	2699	Vu03	7884679	7887377	PF00657	PTHR22835,PTHR22835:SF120	3.1.1.3	0	GO:0016788
Vung22928|c2_g1_i1	Vigun07g212700	Vigun07g212700.1	(1 of 1) PTHR19139//PTHR19139:SF102 - AQUAPORIN TRANSPORTER // AQUAPORIN NIP5-1-RELATED	4189	Vu07	33401089	33405277	PF00230	PTHR19139,PTHR19139:SF102	0	K09874	GO:0016020,GO:0006810,GO:0005215
Vung49634|c0_g1_i1	Vigun03g077100	Vigun03g077100.1	(1 of 5) PTHR10593//PTHR10593:SF41 - SERINE/THREONINE-PROTEIN KINASE RIO // SUBFAMILY NOT NAMED	1288	Vu03	6387893	6389180	PF12874	PTHR10593,PTHR10593:SF41	0	0	0
Vung34941|c2_g3_i1	Vigun09g077600	Vigun09g077600.1	(1 of 2) PTHR24056//PTHR24056:SF196 - CELL DIVISION PROTEIN KINASE // SUBFAMILY NOT NAMED	7307	Vu09	8898965	8906271	PF00069	PTHR24056,PTHR24056:SF196	2.7.11.22,2.7.11.23	0	GO:0006468,GO:0005524,GO:0004672
Vung124113|c0_g1_i1	Vigun07g219300	Vigun07g219300.1	(1 of 22) K01183 - chitinase (E3.2.1.14)	1171	Vu07	34212181	34213351	PF00704	PTHR11177	3.2.1.14	K01183	GO:0005975,GO:0004553
Vung166672|c0_g2_i1	Vigun07g170200	Vigun07g170200.2	(1 of 1) PTHR22849//PTHR22849:SF25 - WDSAM1 PROTEIN // SUBFAMILY NOT NAMED	5132	Vu07	28449096	28454227	PF04564	PTHR22849,PTHR22849:SF25	6.3.2.19	0	GO:0016567,GO:0004842
Vung6730|c0_g1_i6	Vigun03g361500	Vigun03g361500.3	(1 of 2) 3.1.3.41 - 4-nitrophenylphosphatase	6009	Vu03	56490136	56496144	PF14008,PF16656,PF00149	PTHR22953,PTHR22953:SF13	3.1.3.41,3.1.3.2,3.1.3.60	0	GO:0016787
Vung57277|c0_g1_i1	Vigun09g219400	Vigun09g219400.1	(1 of 10) PF07911 - Protein of unknown function (DUF1677) (DUF1677)	2228	Vu09	39338338	39340565	PF07911	PTHR33108,PTHR33108:SF15	0	0	0
Vung22709|c1_g1_i1	Vigun02g191300	Vigun02g191300.2	0	1842	Vu02	32882925	32884766	0	PTHR35105,PTHR35105:SF2	0	0	0
Vung20829|c0_g1_i1	Vigun03g004200	Vigun03g004200.1	(1 of 5) PTHR10891:SF573 - CALCIUM-BINDING PROTEIN CML24-RELATED	1153	Vu03	284774	285926	PF13499	PTHR10891,PTHR10891:SF573	0	K13448	0
Vung97884|c0_g1_i2	Vigun01g051700	Vigun01g051700.1	(1 of 2) PTHR11260:SF204 - GLUTATHIONE S-TRANSFERASE U21-RELATED	1521	Vu01	8489498	8491018	PF13410,PF02798	PTHR11260,PTHR11260:SF204	2.5.1.18	K00799	GO:0005515
Vung158693|c0_g1_i1	Vigun08g055000	Vigun08g055000.1	0	3556	Vu08	6739991	6743546	0	PTHR31182,PTHR31182:SF5	0	0	0
Vung47237|c0_g1_i1	Vigun11g003600	Vigun11g003600.1	(1 of 4) PTHR27000:SF151 - DNA-DAMAGE-REPAIR/TOLERATION PROTEIN DRT100-RELATED	1506	Vu11	356750	358255	PF08263,PF00560,PF13855	PTHR27000,PTHR27000:SF151	3.2.1.15	0	GO:0005515
Vung31870|c0_g2_i1	Vigun05g148900	Vigun05g148900.1	(1 of 12) K08237 - hydroquinone glucosyltransferase [EC:2.4.1.218] Glc b1- hydroquinone (E2.4.1.218)	1818	Vu05	21485996	21487813	PF00201	PTHR11926,PTHR11926:SF381	2.4.1.218	K08237	GO:0016758,GO:0008152
Vung42227|c0_g1_i1	Vigun03g386900	Vigun03g386900.2	(1 of 4) KOG2210 - Oxysterol-binding protein	2634	Vu03	59295504	59298137	PF01237	PTHR10972	0	0	0
Vung30327|c0_g1_i1	Vigun09g256900	Vigun09g256900.1	0	1136	Vu09	42282800	42283935	0	PTHR34779	0	0	0
Vung24172|c3_g1_i1	Vigun01g124700	Vigun01g124700.1	(1 of 8) K10355 - actin, other eukaryote (ACTF)	3687	Vu01	30154789	30158475	PF00022	PTHR11937,PTHR11937:SF255	0	K10355	0
Vung47571|c0_g2_i7	Vigun05g230700	Vigun05g230700.1	(1 of 3) K09503 - DnaJ homolog subfamily A member 2 (DNAJA2)	2404	Vu05	42422787	42425190	PF00684,PF00226,PF01556	PTHR24078,PTHR24078:SF237	0	K09503	GO:0051082,GO:0031072
Vung122177|c1_g1_i3	Vigun09g203800	Vigun09g203800.1	(1 of 1) PTHR31365:SF5 - COPPER ION BINDING PROTEIN-RELATED	3044	Vu09	37837503	37840546	0	PTHR31365,PTHR31365:SF5	0	0	0
Vung118657|c1_g2_i11	Vigun01g223400	Vigun01g223400.1	(1 of 2) PTHR22950//PTHR22950:SF48 - AMINO ACID TRANSPORTER // PROLINE TRANSPORTER 1-RELATED	5650	Vu01	39689763	39695412	PF01490	PTHR22950,PTHR22950:SF48	0	0	0
Vung128261|c1_g1_i3	Vigun03g115300	Vigun03g115300.1	(1 of 166) PF00646 - F-box domain (F-box)	1483	Vu03	10539962	10541444	PF00646	PTHR34049	0	0	GO:0005515
Vung137817|c0_g1_i10	Vigun03g236900	Vigun03g236900.1	(1 of 19) PF03181 - BURP domain (BURP)	2552	Vu03	39436154	39438705	PF03181	PTHR31458,PTHR31458:SF2	0	0	0
Vung137817|c0_g1_i11	Vigun03g236900	Vigun03g236900.1	(1 of 19) PF03181 - BURP domain (BURP)	2552	Vu03	39436154	39438705	PF03181	PTHR31458,PTHR31458:SF2	0	0	0
Vung100508|c0_g1_i1	Vigun04g054600	Vigun04g054600.1	(1 of 40) PF01357//PF03330 - Pollen allergen (Pollen_allerg_1) // Rare lipoprotein A (RlpA)-like double-psi beta-barrel (DPBB_1)	1936	Vu04	5247770	5249705	PF03330,PF01357	PTHR31867	0	0	0
Vung103273|c0_g3_i7	Vigun05g249600	Vigun05g249600.1	(1 of 1) 3.2.1.145//3.2.1.23 - Galactan 1,3-beta-galactosidase // Beta-galactosidase / Lactase	6630	Vu05	44339927	44346556	PF02140,PF01301	PTHR23421,PTHR23421:SF58	3.2.1.145,3.2.1.23	0	GO:0030246,GO:0005975,GO:0004553
Vung92645|c0_g2_i1	Vigun03g446500	Vigun03g446500.1	0	3365	Vu03	64795752	64799116	0	PTHR34775,PTHR34775:SF3	0	0	0
Vung45798|c0_g3_i4	Vigun11g111800	Vigun11g111800.1	(1 of 8) PTHR10641//PTHR10641:SF584 - MYB-LIKE DNA-BINDING PROTEIN MYB // SUBFAMILY NOT NAMED	1462	Vu11	31371653	31373114	PF00249	PTHR10641,PTHR10641:SF584	0	K09422	0
Vung116244|c2_g5_i6	Vigun01g104100	Vigun01g104100.2	(1 of 2) PTHR15141//PTHR15141:SF40 - TRANSCRIPTION ELONGATION FACTOR B POLYPEPTIDE 3 // MEDIATOR OF RNA POLYMERASE II TRANSCRIPTION SUBUNIT 26A-RELATED	3981	Vu01	27400999	27404979	PF08711	PTHR15141,PTHR15141:SF40	0	0	GO:0006351,GO:0005634,GO:0003677
Vung114385|c0_g3_i1	Vigun02g197100	Vigun02g197100.1	(1 of 7) 3.1.1.1//4.2.1.105 - Carboxylesterase / Procaine esterase // 2-hydroxyisoflavanone dehydratase	2061	Vu02	33217275	33219335	PF00135	PTHR23024,PTHR23024:SF193	4.2.1.105,3.1.1.1	0	0
Vung14248|c0_g2_i1	Vigun07g148800	Vigun07g148800.1	(1 of 10) K10664 - E3 ubiquitin-protein ligase ATL6/9/15/31/42/55 [EC:6.3.2.19] (ATL6S)	1104	Vu07	25948010	25949113	PF13639	PTHR14155	0	K10664	GO:0008270,GO:0005515
Vung72358|c0_g1_i4	Vigun05g298400	Vigun05g298400.1	(1 of 10) PTHR23042//PTHR23042:SF57 - CIRCADIAN PROTEIN CLOCK/ARNT/BMAL/PAS // SUBFAMILY NOT NAMED	2298	Vu05	48284375	48286672	PF00010	PTHR23042,PTHR23042:SF57	0	0	GO:0046983
Vung17944|c1_g5_i1	Vigun09g243400	Vigun09g243400.1	(1 of 2) PTHR13778:SF6 - GALACTURONOSYLTRANSFERASE-LIKE 1-RELATED	1095	Vu09	41247994	41249088	PF01501	PTHR13778,PTHR13778:SF6	2.4.1.43	0	GO:0016757
Vung99730|c0_g4_i7	Vigun03g113800	Vigun03g113800.1	(1 of 7) K17871 - NADH:ubiquinone reductase (non-electrogenic) (ndh1)	4408	Vu03	10433239	10437646	PF00070	PTHR22912	1.6.5.9	K17871	GO:0055114,GO:0016491
Vung42859|c0_g1_i6	Vigun02g034200	Vigun02g034200.1	(1 of 7) 3.1.30.1 - Aspergillus nuclease S(1) / Single-stranded-nucleate endonuclease	9705	Vu02	14382906	14392610	PF02265	PTHR33146,PTHR33146:SF2	3.1.30.1	0	GO:0006308,GO:0004519,GO:0003676
Vung39886|c0_g2_i1	Vigun02g121000	Vigun02g121000.1	(1 of 2) PTHR31356//PTHR31356:SF8 - FAMILY NOT NAMED // L-ASCORBATE PEROXIDASE 5, PEROXISOMAL	2743	Vu02	27336696	27339438	PF00141	PTHR31356,PTHR31356:SF8	1.11.1.11	K00434	GO:0055114,GO:0020037,GO:0006979,GO:0004601
Vung143027|c0_g1_i7	Vigun07g059000	Vigun07g059000.1	0	3735	Vu07	6594048	6597782	0	PTHR31250,PTHR31250:SF10	0	0	0
Vung118341|c0_g2_i9	Vigun03g267600	Vigun03g267600.1	(1 of 2) PTHR14255//PTHR14255:SF11 - ATP-DEPENDENT PROTEASE CEREBLON // SUBFAMILY NOT NAMED	3620	Vu03	43854122	43857741	PF01925	PTHR14255,PTHR14255:SF11	0	0	GO:0016021
Vung131674|c0_g1_i2	Vigun09g232400	Vigun09g232400.1	(1 of 42) PF13912 - C2H2-type zinc finger (zf-C2H2_6)	1159	Vu09	40369705	40370863	PF13912	PTHR26374,PTHR26374:SF164	0	0	0
Vung142448|c0_g1_i2	Vigun05g043700	Vigun05g043700.1	(1 of 9) PF03007//PF06974 - Wax ester synthase-like Acyl-CoA acyltransferase domain (WES_acyltransf) // Protein of unknown function (DUF1298) (DUF1298)	2796	Vu05	3623448	3626243	PF03007,PF06974	PTHR31650,PTHR31650:SF7	0	0	GO:0045017,GO:0004144
Vung76468|c0_g3_i1	Vigun11g119000	Vigun11g119000.1	(1 of 3) PTHR24361//PTHR24361:SF380 - MITOGEN-ACTIVATED KINASE KINASE KINASE // MITOGEN-ACTIVATED PROTEIN KINASE KINASE KINASE 17-RELATED	1071	Vu11	32505575	32506645	PF00069	PTHR24361,PTHR24361:SF380	2.7.11.25	0	GO:0006468,GO:0005524,GO:0004672
Vung19557|c0_g1_i3	Vigun05g288200	Vigun05g288200.1	(1 of 1) PTHR31734:SF34 - AUXIN-RESPONSIVE PROTEIN IAA15	1671	Vu05	47523341	47525011	PF02309	PTHR31734,PTHR31734:SF34	0	K14484	GO:0006355,GO:0005634
Vung64974|c0_g2_i1	Vigun05g205500	Vigun05g205500.1	(1 of 54) PF02298 - Plastocyanin-like domain (Cu_bind_like)	1219	Vu05	39456083	39457301	PF02298	PTHR33021,PTHR33021:SF60	0	0	GO:0009055
Vung7869|c1_g1_i9	Vigun01g081100	Vigun01g081100.2	(1 of 14) 5.99.1.2 - DNA topoisomerase / Untwisting enzyme	2756	Vu01	22831129	22833884	PF06839	PTHR33680,PTHR33680:SF1	5.99.1.2	0	GO:0008270
Vung33346|c0_g3_i1	Vigun06g015300	Vigun06g015300.1	(1 of 1) PTHR33044//PTHR33044:SF24 - FAMILY NOT NAMED // NON-SPECIFIC LIPID TRANSFER PROTEIN GPI-ANCHORED 2-RELATED	4258	Vu06	7160277	7164534	PF14368	PTHR33044,PTHR33044:SF24	0	0	0
Vung70178|c0_g1_i2	Vigun05g100700	Vigun05g100700.1	(1 of 5) 1.14.11.19 - Leucocyanidin oxygenase / Leucoanthocyanidin dioxygenase	3494	Vu05	9955230	9958723	PF03171,PF14226	PTHR10209,PTHR10209:SF134	1.14.11.19	0	GO:0055114,GO:0016491
Vung70178|c0_g1_i7	Vigun05g100700	Vigun05g100700.1	(1 of 5) 1.14.11.19 - Leucocyanidin oxygenase / Leucoanthocyanidin dioxygenase	3494	Vu05	9955230	9958723	PF03171,PF14226	PTHR10209,PTHR10209:SF134	1.14.11.19	0	GO:0055114,GO:0016491
Vung131934|c0_g1_i6	Vigun01g008900	Vigun01g008900.1	(1 of 3) PTHR10788:SF38 - TREHALOSE-PHOSPHATE PHOSPHATASE F-RELATED	5706	Vu01	1045156	1050861	PF02358	PTHR10788,PTHR10788:SF38	3.1.3.12	K01087	GO:0005992,GO:0003824
Vung110233|c0_g1_i1	Vigun04g032300	Vigun04g032300.2	0	1409	Vu04	2658842	2660250	0	PTHR33544,PTHR33544:SF5	0	0	0
Vung15403|c0_g1_i1	Vigun04g030400	Vigun04g030400.1	(1 of 2) PTHR10891//PTHR10891:SF608 - EF-HAND CALCIUM-BINDING DOMAIN CONTAINING PROTEIN // SUBFAMILY NOT NAMED	1235	Vu04	2419409	2420643	PF13833,PF13499	PTHR10891,PTHR10891:SF608	4.1.2.13	K13448	0
Vung45177|c0_g1_i5	Vigun08g012300	Vigun08g012300.3	(1 of 1) PTHR31898//PTHR31898:SF1 - FAMILY NOT NAMED // TRANSMEMBRANE PROTEIN 136	2042	Vu08	1083144	1085185	PF03798	PTHR31898,PTHR31898:SF1	0	0	GO:0016021
Vung166218|c0_g2_i1	Vigun09g222500	Vigun09g222500.1	(1 of 4) PTHR11527:SF93 - 17.6 KDA CLASS II HEAT SHOCK PROTEIN-RELATED	1084	Vu09	39558678	39559761	PF00011	PTHR11527,PTHR11527:SF93	0	K13993	0
Vung109485|c0_g1_i2	Vigun02g090600	Vigun02g090600.1	0	2445	Vu02	24548149	24550593	0	0	0	0	0
Vung141550|c0_g1_i1	Vigun03g060000	Vigun03g060000.1	(1 of 1) PTHR22952//PTHR22952:SF130 - CAMP-RESPONSE ELEMENT BINDING PROTEIN-RELATED // SUBFAMILY NOT NAMED	1599	Vu03	4918943	4920541	PF14144	PTHR22952,PTHR22952:SF130	0	0	GO:0043565,GO:0006351
Vung162107|c0_g1_i2	Vigun11g209200	Vigun11g209200.2	(1 of 1) PTHR11527//PTHR11527:SF95 - SMALL HEAT-SHOCK PROTEIN HSP20 FAMILY // 23.5 KDA HEAT SHOCK PROTEIN, MITOCHONDRIAL-RELATED	1203	Vu11	40502096	40503298	PF00011	PTHR11527,PTHR11527:SF95	0	K13993	0
Vung27394|c0_g1_i1	Vigun02g160700	Vigun02g160700.1	(1 of 2) PTHR33077:SF13 - PROTEIN TIFY 10A-RELATED	1553	Vu02	30649892	30651444	PF06200,PF09425	PTHR33077,PTHR33077:SF13	0	K13464	0
Vung58691|c1_g1_i1	Vigun01g233500	Vigun01g233500.2	(1 of 16) PF05701 - Weak chloroplast movement under blue light (WEMBL)	3247	Vu01	40527182	40530428	PF05701	PTHR32054,PTHR32054:SF13	0	0	0
Vung19753|c0_g1_i10	Vigun09g178200	Vigun09g178200.4	(1 of 1) PTHR11778//PTHR11778:SF0 - SERYL-TRNA SYNTHETASE // SERINE--TRNA LIGASE, MITOCHONDRIAL	4291	Vu09	35062292	35066582	PF00587	PTHR11778,PTHR11778:SF0	6.1.1.11	0	GO:0006418,GO:0005524,GO:0004812,GO:0000166,GO:0006434,GO:0005737,GO:0004828
Vung90368|c2_g1_i2	Vigun06g201000	Vigun06g201000.1	(1 of 2) PTHR12956:SF19 - F3H9.11 PROTEIN	5887	Vu06	31617378	31623264	PF04765	PTHR12956,PTHR12956:SF19	0	0	0
Vung121493|c3_g1_i6	Vigun06g076800	Vigun06g076800.1	(1 of 4) K10257 - omega-3 fatty acid desaturase (delta-15 desaturase) (FAD8, desB)	2356	Vu06	20748895	20751250	PF11960,PF00487	PTHR32100,PTHR32100:SF20	0	K10257	GO:0055114,GO:0016717,GO:0006629
Vung47995|c0_g1_i3	Vigun07g076900	Vigun07g076900.1	(1 of 4) PTHR18952//PTHR18952:SF100 - CARBONIC ANHYDRASE // ALPHA CARBONIC ANHYDRASE 5	3338	Vu07	10319536	10322873	PF00194	PTHR18952,PTHR18952:SF100	4.2.1.1	K01674	0
Vung45186|c0_g1_i1	Vigun03g039300	Vigun03g039300.1	(1 of 1) PTHR21495//PTHR21495:SF49 - NUCLEOPORIN-RELATED // SUBFAMILY NOT NAMED	1023	Vu03	2993029	2994051	PF03018	PTHR21495,PTHR21495:SF49	0	0	0
Vung85970|c0_g1_i1	Vigun02g155000	Vigun02g155000.1	(1 of 2) PTHR23042:SF25 - TRANSCRIPTION FACTOR NAI1	2215	Vu02	30153385	30155599	PF00010	PTHR23042,PTHR23042:SF25	0	0	GO:0046983
Vung127756|c0_g1_i4	Vigun06g148900	Vigun06g148900.1	(1 of 4) PTHR31964:SF10 - ADENINE NUCLEOTIDE ALPHA HYDROLASES-LIKE SUPERFAMILY PROTEIN	1955	Vu06	27378763	27380717	0	PTHR31964,PTHR31964:SF10	6.3.2.19	0	0
Vung146390|c0_g1_i10	Vigun02g168300	Vigun02g168300.2	(1 of 18) PF04640 - PLATZ transcription factor (PLATZ)	1648	Vu02	31179227	31180874	PF04640	PTHR31065,PTHR31065:SF1	0	0	0
Vung124294|c0_g1_i4	Vigun08g049200	Vigun08g049200.4	(1 of 2) K11366 - ubiquitin carboxyl-terminal hydrolase 22/27/51 [EC:3.4.19.12] (USP22_27_51, UBP8)	3845	Vu08	5507502	5511346	PF02148,PF13423	PTHR24006,PTHR24006:SF441	3.4.19.12	K11366	GO:0008270
Vung85334|c0_g1_i2	Vigun03g366600	Vigun03g366600.1	(1 of 2) PTHR10766//PTHR10766:SF54 - TRANSMEMBRANE 9 SUPERFAMILY PROTEIN // ENDOMEMBRANE FAMILY PROTEIN 70	2693	Vu03	56984366	56987058	PF02990	PTHR10766,PTHR10766:SF54	0	K17086	GO:0016021
Vung5923|c1_g1_i3	Vigun05g243200	Vigun05g243200.1	(1 of 5) 5.3.3.17 - Trans-2,3-dihydro-3-hydroxyanthranilate isomerase	2642	Vu05	43633822	43636463	PF02567	PTHR13774,PTHR13774:SF17	5.3.3.17	0	GO:0009058,GO:0003824
Vung116133|c3_g1_i10	Vigun06g203600	Vigun06g203600.2	(1 of 1298) 2.7.11.1 - Non-specific serine/threonine protein kinase / Threonine-specific protein kinase	3461	Vu06	31799401	31802861	PF00069	PTHR27006,PTHR27006:SF20	2.7.11.1	0	GO:0006468,GO:0005524,GO:0004672
Vung122576|c0_g1_i3	Vigun09g038700	Vigun09g038700.1	(1 of 2) PTHR10795//PTHR10795:SF434 - PROPROTEIN CONVERTASE SUBTILISIN/KEXIN // SUBTILISIN SERINE PROTEASE-RELATED	2872	Vu09	3472273	3475144	PF02225,PF05922,PF00082	PTHR10795,PTHR10795:SF434	3.4.21.25	0	GO:0006508,GO:0004252
Vung154832|c0_g1_i2	Vigun08g161200	Vigun08g161200.1	(1 of 3) PTHR10209:SF134 - 2-OXOGLUTARATE (2OG) AND FE(II)-DEPENDENT OXYGENASE-LIKE PROTEIN	3103	Vu08	33365251	33368353	PF03171,PF14226	PTHR10209,PTHR10209:SF134	1.14.11.23	0	GO:0055114,GO:0016491
Vung137089|c4_g6_i2	Vigun10g177600	Vigun10g177600.1	(1 of 2) PTHR22835//PTHR22835:SF170 - ZINC FINGER FYVE DOMAIN CONTAINING PROTEIN // SUBFAMILY NOT NAMED	1826	Vu10	39607059	39608884	PF00657	PTHR22835,PTHR22835:SF170	3.1.1.3	0	GO:0016788
Vung93110|c0_g1_i1	Vigun06g088400	Vigun06g088400.1	(1 of 1) PTHR11260//PTHR11260:SF16 - GLUTATHIONE S-TRANSFERASE, GST, SUPERFAMILY, GST DOMAIN CONTAINING // SUBFAMILY NOT NAMED	1086	Vu06	22071655	22072740	PF13410,PF02798	PTHR11260,PTHR11260:SF16	2.5.1.18	K00799	GO:0005515
Vung52674|c0_g1_i1	Vigun10g090400	Vigun10g090400.1	(1 of 7) PTHR21495//PTHR21495:SF77 - NUCLEOPORIN-RELATED // DIRIGENT PROTEIN 19	1006	Vu10	26127710	26128715	PF03018	PTHR21495,PTHR21495:SF77	0	0	0
Vung141342|c0_g1_i1	Vigun08g206900	Vigun08g206900.1	0	1288	Vu08	37000063	37001350	0	PTHR31681,PTHR31681:SF9	0	0	0
Vung58691|c2_g2_i1	Vigun11g018500	Vigun11g018500.1	(1 of 2) PTHR23024//PTHR23024:SF135 - MEMBER OF 'GDXG' FAMILY OF LIPOLYTIC ENZYMES // SUBFAMILY NOT NAMED	999	Vu11	2291375	2292373	PF07859	PTHR23024,PTHR23024:SF135	3.1.1.1	0	GO:0016787,GO:0008152
Vung76468|c0_g2_i1	Vigun05g227800	Vigun05g227800.1	(1 of 3) PTHR24361//PTHR24361:SF380 - MITOGEN-ACTIVATED KINASE KINASE KINASE // MITOGEN-ACTIVATED PROTEIN KINASE KINASE KINASE 17-RELATED	1218	Vu05	42079460	42080677	PF00069	PTHR24361,PTHR24361:SF380	2.7.11.25	0	GO:0006468,GO:0005524,GO:0004672
Vung121493|c3_g1_i9	Vigun06g076800	Vigun06g076800.1	(1 of 4) K10257 - omega-3 fatty acid desaturase (delta-15 desaturase) (FAD8, desB)	2356	Vu06	20748895	20751250	PF11960,PF00487	PTHR32100,PTHR32100:SF20	0	K10257	GO:0055114,GO:0016717,GO:0006629
Vung54462|c0_g1_i2	Vigun05g221400	Vigun05g221400.1	(1 of 3) PTHR10641//PTHR10641:SF541 - MYB-LIKE DNA-BINDING PROTEIN MYB // SUBFAMILY NOT NAMED	2889	Vu05	41320320	41323208	PF00249	PTHR10641,PTHR10641:SF541	0	K09422	0
Vung159203|c0_g1_i3	Vigun10g157000	Vigun10g157000.1	(1 of 2) PTHR31707//PTHR31707:SF55 - FAMILY NOT NAMED // PECTINESTERASE 2-RELATED	5185	Vu10	37648871	37654055	PF04043,PF01095	PTHR31707,PTHR31707:SF55	3.1.1.11	K01051	GO:0004857,GO:0042545,GO:0030599,GO:0005618
Vung35049|c0_g1_i8	Vigun02g066100	Vigun02g066100.1	(1 of 1) PTHR37736//PTHR37736:SF1 - FAMILY NOT NAMED // GENOMIC DNA, CHROMOSOME 3, P1 CLONE:MSD24	7572	Vu02	21601421	21608992	0	PTHR37736,PTHR37736:SF1	0	0	0
Vung55055|c3_g1_i1	Vigun01g008500	Vigun01g008500.1	(1 of 101) PF02365 - No apical meristem (NAM) protein (NAM)	5305	Vu01	1000148	1005452	PF02365	PTHR31989,PTHR31989:SF3	0	0	GO:0006355,GO:0003677
Vung154849|c2_g2_i1	Vigun09g111200	Vigun09g111200.2	(1 of 2) K15979 - staphylococcal nuclease domain-containing protein 1 (SND1)	6636	Vu09	23984390	23991025	PF00565	PTHR12302,PTHR12302:SF2	3.1.31.1	0	GO:0035194,GO:0003712
Vung57371|c0_g2_i1	Vigun09g074300	Vigun09g074300.1	(1 of 3) PTHR23201:SF21 - GIBBERELLIN-REGULATED PROTEIN 4	1464	Vu09	8372269	8373732	PF02704	PTHR23201,PTHR23201:SF21	0	0	0
Vung22899|c2_g1_i6	Vigun11g132200	Vigun11g132200.1	(1 of 3) K12449 - UDP-apiose/xylose synthase (AXS)	2869	Vu11	34083362	34086230	PF01073	PTHR10366,PTHR10366:SF348	4.1.1.35	K12449	GO:0055114,GO:0016616,GO:0006694,GO:0003854
Vung118147|c0_g1_i1	Vigun03g210600	Vigun03g210600.1	0	1027	Vu03	34668029	34669055	0	0	0	0	0
Vung17529|c0_g1_i5	Vigun05g172100	Vigun05g172100.1	(1 of 1) PTHR10774:SF80 - CALCIUM-DEPENDENT LIPID-BINDING DOMAIN-CONTAINING PROTEIN	5662	Vu05	30847512	30853173	PF00168	PTHR10774,PTHR10774:SF80	0	0	GO:0005515
Vung125972|c3_g2_i2	Vigun06g027000	Vigun06g027000.2	(1 of 2) PTHR24343:SF189 - CBL-INTERACTING SERINE/THREONINE-PROTEIN KINASE 3	8826	Vu06	12106195	12115020	PF03822,PF00069	PTHR24343,PTHR24343:SF189	2.7.11.1	0	GO:0007165,GO:0006468,GO:0005524,GO:0004672
Vung32604|c1_g1_i1	Vigun02g060000	Vigun02g060000.1	(1 of 3) PTHR11240:SF19 - F7A19.32 PROTEIN-RELATED	2015	Vu02	20546010	20548024	PF00445	PTHR11240,PTHR11240:SF19	3.1.27.1	K01166	GO:0033897,GO:0003723
Vung50724|c0_g1_i1	Vigun03g075000	Vigun03g075000.1	(1 of 2) PTHR31718//PTHR31718:SF0 - FAMILY NOT NAMED // EXPRESSED PROTEIN-RELATED	1091	Vu03	6223639	6224729	PF01477	PTHR31718,PTHR31718:SF0	0	0	GO:0005515
Vung102629|c3_g1_i2	Vigun03g273100	Vigun03g273100.1	(1 of 2) PTHR11709//PTHR11709:SF26 - MULTI-COPPER OXIDASE // SUBFAMILY NOT NAMED	2898	Vu03	44843245	44846142	PF07731,PF07732,PF00394	PTHR11709,PTHR11709:SF26	1.10.3.3	0	GO:0055114,GO:0016491,GO:0005507
Vung74310|c2_g3_i3	Vigun08g021800	Vigun08g021800.2	(1 of 11) 3.1.1.26 - Galactolipase	2745	Vu08	1908611	1911355	PF01734	PTHR32176	3.1.1.26	0	GO:0006629
Vung34214|c0_g1_i1	Vigun01g234100	Vigun01g234100.1	(1 of 4) K16282 - E3 ubiquitin-protein ligase RHA2 [EC:6.3.2.19] (RHA2)	1928	Vu01	40587885	40589812	PF13639	PTHR14155,PTHR14155:SF175	0	K16282	GO:0008270,GO:0005515
Vung52478|c0_g1_i1	Vigun04g055400	Vigun04g055400.1	(1 of 4) PF09366 - Protein of unknown function (DUF1997) (DUF1997)	2250	Vu04	5411848	5414097	PF09366	PTHR34133,PTHR34133:SF2	0	0	0
Vung71305|c1_g4_i1	Vigun06g101700	Vigun06g101700.2	(1 of 24) 1.13.11.58 - Linoleate 9S-lipoxygenase / Linoleate 9-lipoxygenase	5501	Vu06	23190983	23196483	PF01477,PF00305	PTHR11771,PTHR11771:SF48	1.13.11.58	K15718	GO:0005515,GO:0055114,GO:0046872,GO:0016702
Vung124964|c0_g1_i3	Vigun09g224200	Vigun09g224200.1	(1 of 2) K15084 - solute carrier family 25 (mitochondrial carrier protein), member 16 (SLC25A16, GDA, LEU5)	4521	Vu09	39711696	39716216	PF00153	PTHR24089,PTHR24089:SF331	0	K15084	0
Vung100052|c0_g1_i2	Vigun03g204400	Vigun03g204400.1	(1 of 3) PF03350 - Uncharacterized protein family, UPF0114 (UPF0114)	1564	Vu03	32956774	32958337	PF03350	PTHR31721,PTHR31721:SF3	0	0	0
Vung12710|c0_g1_i1	Vigun09g178400	Vigun09g178400.1	0	1036	Vu09	35079095	35080130	0	PTHR34046,PTHR34046:SF3	0	0	0
Vung152958|c0_g1_i3	Vigun07g085700	Vigun07g085700.1	(1 of 5) PTHR24320:SF81 - NAD(P)-BINDING ROSSMANN-FOLD SUPERFAMILY PROTEIN	5145	Vu07	12901378	12906522	PF00106	PTHR24320,PTHR24320:SF81	1.1.1.330	0	GO:0016491,GO:0008152
Vung142615|c0_g1_i5	Vigun09g043400	Vigun09g043400.1	(1 of 3) PTHR31707:SF10 - PECTINESTERASE/PECTINESTERASE INHIBITOR 32-RELATED	3509	Vu09	4056595	4060103	PF04043,PF01095	PTHR31707,PTHR31707:SF10	3.1.1.11	K01051	GO:0004857,GO:0042545,GO:0030599,GO:0005618
Vung40326|c0_g2_i10	Vigun09g278700	Vigun09g278700.2	(1 of 1) 2.4.1.101 - Alpha-1,3-mannosyl-glycoprotein 2-beta-N-acetylglucosaminyltransferase / 1,2-N-acetylglucosaminyltransferase	12773	Vu09	43836749	43849521	PF03071	PTHR10468,PTHR10468:SF0	2.4.1.101	K00726	GO:0008375,GO:0006486
Vung54659|c1_g2_i24	Vigun11g191400	Vigun11g191400.2	(1 of 1) PTHR10774//PTHR10774:SF82 - EXTENDED SYNAPTOTAGMIN-RELATED // SUBFAMILY NOT NAMED	8173	Vu11	39072063	39080235	PF00168	PTHR10774,PTHR10774:SF82	0	0	GO:0005515
Vung40629|c0_g2_i1	Vigun05g057200	Vigun05g057200.1	(1 of 1) PTHR24220//PTHR24220:SF441 - FAMILY NOT NAMED // PROTEIN TRIGALACTOSYLDIACYLGLYCEROL 3, CHLOROPLASTIC	4719	Vu05	4900903	4905621	PF00005	PTHR24220,PTHR24220:SF441	3.6.3.25	0	GO:0016887,GO:0005524
Vung142825|c0_g2_i1	Vigun07g009600	Vigun07g009600.1	(1 of 3) PTHR11941//PTHR11941:SF84 - ENOYL-COA HYDRATASE-RELATED // SUBFAMILY NOT NAMED	1231	Vu07	808445	809675	PF00378	PTHR11941,PTHR11941:SF84	0	0	GO:0008152,GO:0003824
Vung115541|c1_g5_i2	Vigun03g397200	Vigun03g397200.1	(1 of 2) PTHR22893//PTHR22893:SF67 - NADH OXIDOREDUCTASE-RELATED // 12-OXOPHYTODIENOATE REDUCTASE 3	2015	Vu03	60367807	60369821	PF00724	PTHR22893,PTHR22893:SF67	1.3.1.42	K05894	GO:0055114,GO:0016491,GO:0010181
Vung42661|c0_g1_i1	Vigun03g012600	Vigun03g012600.1	(1 of 2) PTHR12629:SF4 - NUDIX HYDROLASE 17, MITOCHONDRIAL-RELATED	1603	Vu03	848862	850464	PF00293	PTHR12629,PTHR12629:SF4	3.6.1.22,3.6.1.13	K07766	GO:0016787
Vung134572|c0_g1_i1	Vigun11g142900	Vigun11g142900.1	(1 of 1) 3.4.21.45 - Complement factor I / Complement component C3b inactivator	936	Vu11	35245444	35246379	0	0	3.4.21.45	0	0
Vung79280|c3_g1_i1	Vigun03g397100	Vigun03g397100.1	(1 of 2) PTHR22893//PTHR22893:SF67 - NADH OXIDOREDUCTASE-RELATED // 12-OXOPHYTODIENOATE REDUCTASE 3	3950	Vu03	60349579	60353528	PF00724	PTHR22893,PTHR22893:SF67	1.3.1.42	K05894	GO:0055114,GO:0016491,GO:0010181
Vung95913|c0_g1_i1	Vigun09g053500	Vigun09g053500.2	(1 of 2) PTHR13832//PTHR13832:SF299 - PROTEIN PHOSPHATASE 2C // SUBFAMILY NOT NAMED	3392	Vu09	5345548	5348939	PF00481	PTHR13832,PTHR13832:SF299	3.1.3.16	0	GO:0003824,GO:0006470,GO:0004722
Vung95913|c0_g1_i8	Vigun09g053500	Vigun09g053500.2	(1 of 2) PTHR13832//PTHR13832:SF299 - PROTEIN PHOSPHATASE 2C // SUBFAMILY NOT NAMED	3392	Vu09	5345548	5348939	PF00481	PTHR13832,PTHR13832:SF299	3.1.3.16	0	GO:0003824,GO:0006470,GO:0004722
Vung112872|c0_g1_i1	Vigun06g085800	Vigun06g085800.2	(1 of 4) PTHR31867:SF22 - EXPANSIN-A8	7144	Vu06	21787217	21794360	PF03330,PF01357	PTHR31867,PTHR31867:SF22	0	0	0
Vung20020|c1_g3_i1	Vigun03g350500	Vigun03g350500.1	(1 of 29) PF00069//PF00560//PF08263 - Protein kinase domain (Pkinase) // Leucine Rich Repeat (LRR_1) // Leucine rich repeat N-terminal domain (LRRNT_2)	4908	Vu03	55148468	55153375	PF00560,PF08263,PF00069	PTHR27008,PTHR27008:SF24	2.7.11.1	0	GO:0005515,GO:0006468,GO:0005524,GO:0004672
Vung80447|c0_g1_i1	Vigun07g059500	Vigun07g059500.1	(1 of 1) PTHR31238:SF48 - GERMIN-LIKE PROTEIN SUBFAMILY 3 MEMBER 2	1000	Vu07	6681004	6682003	PF07883	PTHR31238,PTHR31238:SF48	0	0	0
Vung56429|c4_g1_i11	Vigun06g097100	Vigun06g097100.1	(1 of 2) PTHR11999//PTHR11999:SF92 - GROUP II PYRIDOXAL-5-PHOSPHATE DECARBOXYLASE // SUBFAMILY NOT NAMED	6588	Vu06	22838104	22844691	PF00282	PTHR11999,PTHR11999:SF92	4.1.1.15	K01580	GO:0030170,GO:0019752,GO:0016831
Vung32604|c1_g2_i4	Vigun03g207600	Vigun03g207600.1	(1 of 3) PTHR11240:SF19 - F7A19.32 PROTEIN-RELATED	1564	Vu03	33947851	33949414	PF00445	PTHR11240,PTHR11240:SF19	3.1.27.1	K01166	GO:0033897,GO:0003723
Vung110818|c0_g2_i2	Vigun06g174100	Vigun06g174100.2	(1 of 4) PTHR20863//PTHR20863:SF29 - ACYL CARRIER PROTEIN/ZINC FINGER PROTEIN 593-RELATED // ACYL CARRIER PROTEIN 1, CHLOROPLASTIC-RELATED	2962	Vu06	29495573	29498534	PF00550	PTHR20863,PTHR20863:SF29	0	0	0
Vung143552|c0_g1_i1	Vigun03g160500	Vigun03g160500.1	(1 of 2) PTHR10106:SF15 - TRANSMEMBRANE ASCORBATE FERRIREDUCTASE 3-RELATED	1264	Vu03	17727414	17728677	PF03188	PTHR10106,PTHR10106:SF15	1.16.5.1	K08360	GO:0016021
Vung120892|c0_g2_i6	Vigun03g176300	Vigun03g176300.1	(1 of 1) 6.2.1.20//6.2.1.3 - Long-chain-fatty-acid--[acyl-carrier-protein] ligase / Acyl-[acyl-carrier-protein] synthetase // Long-chain-fatty-acid--CoA ligase / Lignoceroyl-CoA synthase	12801	Vu03	21861278	21874078	PF00501	PTHR24096,PTHR24096:SF199	6.2.1.3,6.2.1.20	K01897	GO:0008152,GO:0003824
Vung50230|c1_g2_i1	Vigun01g093100	Vigun01g093100.1	(1 of 2) PTHR12266//PTHR12266:SF2 - NA+/CA2+ K+ INDEPENDENT EXCHANGER // CATION/CALCIUM EXCHANGER 1	2337	Vu01	25523579	25525915	PF01699	PTHR12266,PTHR12266:SF2	0	K13754	GO:0055085,GO:0016021
Vung121157|c0_g2_i5	Vigun01g242500	Vigun01g242500.1	(1 of 2) PTHR31683//PTHR31683:SF26 - FAMILY NOT NAMED // PECTATE LYASE 5-RELATED	2395	Vu01	41181182	41183576	PF00544	PTHR31683,PTHR31683:SF26	4.2.2.2	K01728	0
Vung152317|c0_g1_i1	Vigun07g070300	Vigun07g070300.1	(1 of 2) K02870 - large subunit ribosomal protein L12e (RP-L12e, RPL12)	1137	Vu07	8642918	8644054	PF00298,PF03946	PTHR11661,PTHR11661:SF6	0	K02870	GO:0006412,GO:0005840,GO:0003735
Vung15536|c1_g1_i1	Vigun10g147000	Vigun10g147000.1	(1 of 2) PTHR31985:SF15 - ETHYLENE-RESPONSIVE TRANSCRIPTION FACTOR ERF023	931	Vu10	36527528	36528458	PF00847	PTHR31985,PTHR31985:SF15	0	K09286	GO:0006355,GO:0003700
Vung60393|c1_g1_i2	Vigun07g218200	Vigun07g218200.1	(1 of 4) 4.1.1.22 - Histidine decarboxylase / L-histidine carboxy-lyase	3739	Vu07	34030913	34034651	PF00282	PTHR11999,PTHR11999:SF83	4.1.1.22	K01590	GO:0030170,GO:0019752,GO:0016831
Vung148579|c1_g3_i1	Vigun08g113400	Vigun08g113400.1	(1 of 9) K08176 - MFS transporter, PHS family, inorganic phosphate transporter (PHO84)	1680	Vu08	27988187	27989866	PF07690	PTHR24064,PTHR24064:SF282	0	K08176	GO:0055085,GO:0016021
Vung9905|c6_g6_i9	Vigun05g264900	Vigun05g264900.1	(1 of 2) PTHR22604:SF111 - NAD(P)-BINDING ROSSMANN-FOLD SUPERFAMILY PROTEIN	6643	Vu05	45698913	45705555	PF02894,PF01408	PTHR22604,PTHR22604:SF111	1.1.1.179	0	GO:0055114,GO:0016491,GO:0008152
Vung120448|c0_g1_i2	Vigun05g232400	Vigun05g232400.2	(1 of 17) PF07714//PF08263 - Protein tyrosine kinase (Pkinase_Tyr) // Leucine rich repeat N-terminal domain (LRRNT_2)	4191	Vu05	42642859	42647049	PF08263,PF07714	PTHR27001,PTHR27001:SF84	2.7.11.1	0	GO:0006468,GO:0004672
Vung164007|c0_g1_i1	Vigun02g178400	Vigun02g178400.1	(1 of 2) PTHR11751//PTHR11751:SF380 - SUBGROUP I AMINOTRANSFERASE RELATED // 1-AMINOCYCLOPROPANE-1-CARBOXYLATE SYNTHASE 2-RELATED	2674	Vu02	31962756	31965429	PF00155	PTHR11751,PTHR11751:SF380	4.4.1.14	K01762	GO:0030170,GO:0009058
Vung15938|c0_g2_i2	Vigun11g002200	Vigun11g002200.1	(1 of 2) K02925 - large subunit ribosomal protein L3e (RP-L3e, RPL3)	3422	Vu11	227172	230593	PF00297	PTHR11363,PTHR11363:SF6	0	K02925	GO:0006412,GO:0005840,GO:0005622,GO:0003735
Vung81195|c0_g1_i1	Vigun07g048300	Vigun07g048300.1	(1 of 1) PTHR10545//PTHR10545:SF29 - DIAMINE N-ACETYLTRANSFERASE // PROTEIN D2023.4	882	Vu07	4991387	4992268	PF00583	PTHR10545,PTHR10545:SF29	0	0	GO:0008080
Vung31268|c0_g1_i8	Vigun03g262700	Vigun03g262700.1	(1 of 3) PTHR31288//PTHR31288:SF5 - FAMILY NOT NAMED // GENOMIC DNA, CHROMOSOME 3, P1 CLONE: MXL8-RELATED	1526	Vu03	43191769	43193294	PF10250	PTHR31288,PTHR31288:SF5	0	0	0
Vung63897|c3_g1_i2	Vigun05g220900	Vigun05g220900.1	0	1936	Vu05	41238983	41240918	0	PTHR34056,PTHR34056:SF3	0	0	0
Vung63897|c3_g1_i5	Vigun05g220900	Vigun05g220900.1	0	1936	Vu05	41238983	41240918	0	PTHR34056,PTHR34056:SF3	0	0	0
Vung67186|c0_g3_i2	Vigun09g163700	Vigun09g163700.1	(1 of 1) PTHR11014//PTHR11014:SF62 - PEPTIDASE M20 FAMILY MEMBER // IAA-AMINO ACID HYDROLASE ILR1-LIKE 6	8012	Vu09	33163774	33171785	PF01546	PTHR11014,PTHR11014:SF62	0	K14664	GO:0016787,GO:0008152
Vung82369|c0_g1_i1	Vigun05g267100	Vigun05g267100.1	0	2126	Vu05	45927771	45929896	0	PTHR34055	0	0	0
Vung47370|c0_g1_i1	Vigun09g258900	Vigun09g258900.1	(1 of 24) PF03087 - Arabidopsis protein of unknown function (DUF241)	1687	Vu09	42429982	42431668	PF03087	PTHR33070,PTHR33070:SF14	0	0	0
Vung28059|c0_g1_i1	Vigun11g218400	Vigun11g218400.1	(1 of 48) PF00069//PF00560//PF08263//PF13855 - Protein kinase domain (Pkinase) // Leucine Rich Repeat (LRR_1) // Leucine rich repeat N-terminal domain (LRRNT_2) // Leucine rich repeat (LRR_8)	3947	Vu11	41135355	41139301	PF08263,PF00560,PF13855,PF00069	PTHR27000,PTHR27000:SF64	2.7.11.1	0	GO:0005515,GO:0006468,GO:0005524,GO:0004672
Vung113514|c0_g1_i1	Vigun02g066000	Vigun02g066000.1	(1 of 6) PTHR11654:SF20 - PROTEIN NRT1/ PTR FAMILY 2.12-RELATED	5295	Vu02	21567484	21572778	PF00854	PTHR11654,PTHR11654:SF20	0	0	GO:0016020,GO:0006810,GO:0005215
Vung25537|c0_g1_i1	Vigun03g161900	Vigun03g161900.1	(1 of 1) 2.6.1.13 - Ornithine aminotransferase / Ornithine--oxo-acid transaminase	13256	Vu03	18033131	18046386	PF00202	PTHR11986,PTHR11986:SF18	2.6.1.13	K00819	GO:0030170,GO:0008483
Vung29610|c0_g1_i1	Vigun08g205100	Vigun08g205100.1	(1 of 2) PTHR30314//PTHR30314:SF12 - CELL DIVISION PROTEIN FTSZ-RELATED // CELL DIVISION PROTEIN FTSZ HOMOLOG 1, CHLOROPLASTIC	2884	Vu08	36855224	36858107	PF12327,PF00091	PTHR30314,PTHR30314:SF12	3.6.5.6	K03531	GO:0003924
Vung161149|c2_g1_i5	Vigun10g056700	Vigun10g056700.1	(1 of 18) PTHR24298//PTHR24298:SF61 - FAMILY NOT NAMED // CYTOCHROME P450 81D1-RELATED	2375	Vu10	10433929	10436303	PF00067	PTHR24298,PTHR24298:SF61	0	0	GO:0055114,GO:0020037,GO:0016705,GO:0005506
Vung21957|c0_g1_i1	Vigun09g012900	Vigun09g012900.1	0	1347	Vu09	965494	966840	0	PTHR34460,PTHR34460:SF2	0	0	0
Vung14570|c0_g1_i5	Vigun03g405100	Vigun03g405100.1	(1 of 92) PF03106 - WRKY DNA -binding domain (WRKY)	3836	Vu03	61241699	61245534	PF03106	PTHR31429,PTHR31429:SF5	0	0	GO:0043565,GO:0006355,GO:0003700
Vung70443|c0_g1_i2	Vigun09g174200	Vigun09g174200.1	(1 of 3) PTHR31614//PTHR31614:SF5 - FAMILY NOT NAMED // ALLERGEN-LIKE PROTEIN BRSN20-RELATED	1599	Vu09	34529707	34531305	PF01190	PTHR31614,PTHR31614:SF5	0	0	0
Vung91724|c0_g3_i6	Vigun01g241700	Vigun01g241700.1	(1 of 1) K18723 - nucleoporin GLE1 (GLE1)	7732	Vu01	41123479	41131210	PF07817	PTHR12960,PTHR12960:SF0	0	K18723	GO:0016973,GO:0005643
Vung33923|c0_g1_i1	Vigun03g049500	Vigun03g049500.1	(1 of 112) K14488 - SAUR family protein (SAUR)	925	Vu03	3964605	3965529	PF02519	PTHR31374,PTHR31374:SF10	0	K14488	GO:0009733
Vung27401|c1_g1_i3	Vigun10g062500	Vigun10g062500.1	(1 of 1) PF00170//PF00931//PF13676 - bZIP transcription factor (bZIP_1) // NB-ARC domain (NB-ARC) // TIR domain (TIR_2)	11131	Vu10	13222149	13233279	PF00170,PF13676,PF00931	PTHR11017,PTHR11017:SF163	0	0	GO:0043565,GO:0006355,GO:0003700,GO:0007165,GO:0005515,GO:0043531
Vung162554|c0_g2_i1	Vigun07g266100	Vigun07g266100.1	(1 of 1) PTHR10994:SF85 - RETICULON-LIKE PROTEIN B14-RELATED	1836	Vu07	38162614	38164449	PF02453	PTHR10994,PTHR10994:SF85	0	0	0
Vung53703|c7_g1_i1	Vigun07g219400	Vigun07g219400.1	(1 of 2) PTHR11817:SF2 - PLASTIDIAL PYRUVATE KINASE 2	4689	Vu07	34214518	34219206	PF02887,PF00224	PTHR11817,PTHR11817:SF2	2.7.1.40	K00873	GO:0030955,GO:0006096,GO:0004743,GO:0000287
Vung16162|c0_g2_i1	Vigun07g147600	Vigun07g147600.1	(1 of 2) PTHR33976:SF2 - GLYCOPROTEIN MEMBRANE GPI-ANCHORED	1153	Vu07	25851264	25852416	0	PTHR33976,PTHR33976:SF2	0	0	0
Vung84939|c1_g1_i1	Vigun08g029200	Vigun08g029200.2	0	1861	Vu08	2660831	2662691	0	PTHR37249	0	0	0
Vung96681|c0_g1_i6	Vigun03g036700	Vigun03g036700.1	(1 of 1) PTHR22298:SF19 - ENDOGLUCANASE 19-RELATED	5145	Vu03	2812187	2817331	PF09478,PF00759	PTHR22298,PTHR22298:SF19	3.2.1.4	0	GO:0030246,GO:0005975,GO:0004553
Vung73372|c0_g1_i7	Vigun06g207700	Vigun06g207700.2	(1 of 3) PTHR23336//PTHR23336:SF10 - ZINC FINGER CW-TYPE COILED-COIL DOMAIN PROTEIN 3. // B3 DOMAIN-CONTAINING TRANSCRIPTION REPRESSOR VAL1-RELATED	11860	Vu06	32108254	32120113	PF07496,PF02362	PTHR23336,PTHR23336:SF10	0	0	GO:0008270,GO:0003677
Vung12863|c0_g2_i1	Vigun05g172700	Vigun05g172700.1	(1 of 15) 1.14.13.173 - 11-oxo-beta-amyrin 30-oxidase / CYP72A154	3676	Vu05	31356448	31360123	PF00067	PTHR24282,PTHR24282:SF53	1.14.13.173	0	GO:0055114,GO:0020037,GO:0016705,GO:0005506
Vung26675|c0_g1_i1	Vigun03g432900	Vigun03g432900.2	(1 of 1) PTHR22814//PTHR22814:SF33 - COPPER TRANSPORT PROTEIN ATOX1-RELATED // HEAVY METAL TRANSPORT/DETOXIFICATION DOMAIN-CONTAINING PROTEIN	2718	Vu03	63694910	63697627	PF00403	PTHR22814,PTHR22814:SF33	0	0	GO:0046872,GO:0030001
Vung20731|c0_g2_i1	Vigun05g172700	Vigun05g172700.1	(1 of 15) 1.14.13.173 - 11-oxo-beta-amyrin 30-oxidase / CYP72A154	3676	Vu05	31356448	31360123	PF00067	PTHR24282,PTHR24282:SF53	1.14.13.173	0	GO:0055114,GO:0020037,GO:0016705,GO:0005506
Vung29141|c2_g2_i1	Vigun05g263900	Vigun05g263900.1	0	5108	Vu05	45626164	45631271	0	PTHR33984,PTHR33984:SF2	0	0	0
Vung41730|c2_g4_i3	Vigun08g161200	Vigun08g161200.1	(1 of 3) PTHR10209:SF134 - 2-OXOGLUTARATE (2OG) AND FE(II)-DEPENDENT OXYGENASE-LIKE PROTEIN	3103	Vu08	33365251	33368353	PF03171,PF14226	PTHR10209,PTHR10209:SF134	1.14.11.23	0	GO:0055114,GO:0016491
Vung89423|c0_g1_i1	Vigun07g170100	Vigun07g170100.1	(1 of 5) 2.3.1.119//2.3.1.199 - Transferred entry: 1.1.1.330, 1.3.1.93, 2.3.1.199 and 4.2.1.134 // Very-long-chain 3-oxoacyl-CoA synthase / Very-long-chain beta-ketoacyl-CoA synthase	2493	Vu07	28437257	28439749	PF08541,PF08392	PTHR31561,PTHR31561:SF25	2.3.1.199,2.3.1.119	K15397	GO:0016747,GO:0008610,GO:0016020,GO:0006633
Vung45626|c0_g1_i1	Vigun10g170000	Vigun10g170000.2	(1 of 24) 1.13.11.58 - Linoleate 9S-lipoxygenase / Linoleate 9-lipoxygenase	4974	Vu10	38923021	38927994	PF01477,PF00305	PTHR11771,PTHR11771:SF48	1.13.11.58	K15718	GO:0005515,GO:0055114,GO:0046872,GO:0016702
Vung2449|c0_g1_i1	Vigun09g078400	Vigun09g078400.1	(1 of 2) PTHR11527//PTHR11527:SF121 - SMALL HEAT-SHOCK PROTEIN HSP20 FAMILY // SUBFAMILY NOT NAMED	1183	Vu09	9112630	9113812	PF00011	PTHR11527,PTHR11527:SF121	0	0	0
Vung54053|c1_g1_i3	Vigun08g003000	Vigun08g003000.5	(1 of 1) PF00036//PF07714//PF13499 - EF hand (EF-hand_1) // Protein tyrosine kinase (Pkinase_Tyr) // EF-hand domain pair (EF-hand_7)	2944	Vu08	291430	294373	PF00036,PF07714	PTHR24349,PTHR24349:SF89	2.7.11.1	0	GO:0005509,GO:0006468,GO:0004672
Vung80190|c0_g1_i3	Vigun08g042200	Vigun08g042200.1	(1 of 4) PTHR11527:SF93 - 17.6 KDA CLASS II HEAT SHOCK PROTEIN-RELATED	1021	Vu08	4364898	4365918	PF00011	PTHR11527,PTHR11527:SF93	0	K13993	0
Vung70178|c0_g1_i1	Vigun05g100700	Vigun05g100700.1	(1 of 5) 1.14.11.19 - Leucocyanidin oxygenase / Leucoanthocyanidin dioxygenase	3494	Vu05	9955230	9958723	PF03171,PF14226	PTHR10209,PTHR10209:SF134	1.14.11.19	0	GO:0055114,GO:0016491
Vung81729|c0_g1_i3	Vigun08g098000	Vigun08g098000.1	(1 of 3) K01834 - 2,3-bisphosphoglycerate-dependent phosphoglycerate mutase (PGAM, gpmA)	3101	Vu08	23736646	23739746	PF00300	PTHR11931,PTHR11931:SF6	5.4.2.11	K01834	GO:0016868,GO:0006096,GO:0004619
Vung113817|c4_g2_i3	Vigun03g222900	Vigun03g222900.7	(1 of 3) PTHR10694:SF33 - TRANSCRIPTION FACTOR JUMONJI (JMJ) FAMILY PROTEIN / ZINC FINGER (C5HC2 TYPE) FAMILY PROTEIN	12966	Vu03	37053378	37066343	PF02928,PF02375,PF02373	PTHR10694,PTHR10694:SF33	1.14.11.27	0	0
Vung82182|c1_g1_i1	Vigun03g412600	Vigun03g412600.1	(1 of 1) PTHR10891//PTHR10891:SF629 - EF-HAND CALCIUM-BINDING DOMAIN CONTAINING PROTEIN // SUBFAMILY NOT NAMED	856	Vu03	61987780	61988635	PF13499,PF13202	PTHR10891,PTHR10891:SF629	0	K02183	GO:0005509
Vung132938|c0_g1_i1	Vigun02g047900	Vigun02g047900.1	0	1177	Vu02	18751323	18752499	0	0	0	0	0
Vung3975|c1_g2_i1	Vigun10g089100	Vigun10g089100.1	(1 of 7) PTHR21495//PTHR21495:SF77 - NUCLEOPORIN-RELATED // DIRIGENT PROTEIN 19	809	Vu10	25660128	25660936	PF03018	PTHR21495,PTHR21495:SF77	0	0	0
Vung135825|c0_g2_i1	Vigun02g120300	Vigun02g120300.1	(1 of 9) PTHR22835:SF184 - GDSL ESTERASE/LIPASE EXL1-RELATED	2900	Vu02	27288659	27291558	PF00657	PTHR22835,PTHR22835:SF184	3.1.1.3	0	GO:0016788
Vung162906|c4_g1_i13	Vigun06g027000	Vigun06g027000.2	(1 of 2) PTHR24343:SF189 - CBL-INTERACTING SERINE/THREONINE-PROTEIN KINASE 3	8826	Vu06	12106195	12115020	PF03822,PF00069	PTHR24343,PTHR24343:SF189	2.7.11.1	0	GO:0007165,GO:0006468,GO:0005524,GO:0004672
Vung74310|c2_g3_i6	Vigun08g021800	Vigun08g021800.1	(1 of 11) 3.1.1.26 - Galactolipase	2745	Vu08	1908611	1911355	PF01734	PTHR32176	3.1.1.26	0	GO:0006629
Vung58496|c1_g1_i1	Vigun07g275200	Vigun07g275200.1	(1 of 4) PTHR16007//PTHR16007:SF29 - EPIDIDYMAL MEMBRANE PROTEIN E9-RELATED // SUBFAMILY NOT NAMED	1936	Vu07	39065494	39067429	PF04819	PTHR16007,PTHR16007:SF29	0	0	0
Vung131345|c4_g7_i2	Vigun03g141600	Vigun03g141600.1	(1 of 46) 1.3.3.8 - Tetrahydroberberine oxidase / THB oxidase	1798	Vu03	14206695	14208492	PF08031,PF01565	PTHR32448	1.3.3.8	0	GO:0055114,GO:0050660,GO:0016491
Vung146430|c0_g2_i2	Vigun05g264400	Vigun05g264400.1	(1 of 1) PTHR11926//PTHR11926:SF392 - GLUCOSYL/GLUCURONOSYL TRANSFERASES // SUBFAMILY NOT NAMED	1974	Vu05	45650969	45652942	PF00201	PTHR11926,PTHR11926:SF392	0	0	GO:0016758,GO:0008152
Vung123179|c1_g1_i1	Vigun06g176900	Vigun06g176900.1	(1 of 1) 2.7.8.13 - Phospho-N-acetylmuramoyl-pentapeptide-transferase / UDP-MurNAc-pentapeptide phosphotransferase	8530	Vu06	29702557	29711086	PF00953	PTHR22926,PTHR22926:SF3	2.7.8.13	K01000	GO:0016021,GO:0008963
Vung41730|c0_g1_i1	Vigun01g228500	Vigun01g228500.1	(1 of 1) PTHR10209//PTHR10209:SF155 - OXIDOREDUCTASE, 2OG-FE II OXYGENASE FAMILY PROTEIN // 2-OXOGLUTARATE (2OG) AND FE(II)-DEPENDENT OXYGENASE SUPERFAMILY PROTEIN-RELATED	3552	Vu01	40111751	40115302	PF03171,PF14226	PTHR10209,PTHR10209:SF155	1.14.11.19	0	GO:0055114,GO:0016491
Vung167643|c0_g1_i5	Vigun10g161900	Vigun10g161900.1	(1 of 9) K13464 - jasmonate ZIM domain-containing protein (JAZ)	2449	Vu10	38075598	38078046	PF09425,PF06200	PTHR33077	0	K13464	0
Vung152958|c1_g1_i2	Vigun07g085700	Vigun07g085700.1	(1 of 5) PTHR24320:SF81 - NAD(P)-BINDING ROSSMANN-FOLD SUPERFAMILY PROTEIN	5145	Vu07	12901378	12906522	PF00106	PTHR24320,PTHR24320:SF81	1.1.1.330	0	GO:0016491,GO:0008152
Vung84750|c6_g2_i7	Vigun01g010600	Vigun01g010600.1	(1 of 3) PTHR10366//PTHR10366:SF352 - NAD DEPENDENT EPIMERASE/DEHYDRATASE // SUBFAMILY NOT NAMED	4360	Vu01	1204172	1208531	PF05368	PTHR10366,PTHR10366:SF352	0	0	0
Vung64519|c0_g1_i1	Vigun03g306500	Vigun03g306500.1	(1 of 71) PF14368 - Probable lipid transfer (LTP_2)	1936	Vu03	49736300	49738235	PF14368	PTHR33044,PTHR33044:SF37	0	0	0
Vung75499|c0_g1_i6	Vigun05g179300	Vigun05g179300.1	(1 of 2) PTHR32285//PTHR32285:SF30 - FAMILY NOT NAMED // PROTEIN TRICHOME BIREFRINGENCE-LIKE 42	2074	Vu05	33891592	33893665	PF14416,PF13839	PTHR32285,PTHR32285:SF30	0	0	0
Vung32604|c1_g2_i6	Vigun03g207600	Vigun03g207600.1	(1 of 3) PTHR11240:SF19 - F7A19.32 PROTEIN-RELATED	1564	Vu03	33947851	33949414	PF00445	PTHR11240,PTHR11240:SF19	3.1.27.1	K01166	GO:0033897,GO:0003723
Vung28762|c0_g1_i1	Vigun06g001300	Vigun06g001300.1	(1 of 2) K01761 - methionine-gamma-lyase (E4.4.1.11)	2044	Vu06	630605	632648	PF00155	PTHR11808,PTHR11808:SF55	4.4.1.11	K01761	GO:0030170,GO:0009058
Vung87673|c1_g1_i2	Vigun03g067600	Vigun03g067600.2	(1 of 190) PF00847 - AP2 domain (AP2)	2022	Vu03	5586219	5588240	PF00847	PTHR31190	0	0	GO:0006355,GO:0003700
Vung87035|c0_g1_i3	Vigun01g088500	Vigun01g088500.2	0	3175	Vu01	24689992	24693166	0	0	0	0	0
Vung123557|c0_g1_i1	Vigun07g067100	Vigun07g067100.1	(1 of 2) PTHR33285//PTHR33285:SF2 - FAMILY NOT NAMED // PHYTOSULFOKINES 6-RELATED	1691	Vu07	7960962	7962652	PF06404	PTHR33285,PTHR33285:SF2	0	0	GO:0008283,GO:0008083,GO:0005576
Vung28019|c0_g1_i8	Vigun03g058700	Vigun03g058700.2	(1 of 10) KOG2922 - Uncharacterized conserved protein	4929	Vu03	4800738	4805666	PF05653	PTHR12570,PTHR12570:SF25	0	0	GO:0016021,GO:0015693,GO:0015095
Vung46870|c0_g1_i1	Vigun08g055500	Vigun08g055500.1	(1 of 5) PTHR31194:SF13 - ETHYLENE-RESPONSIVE TRANSCRIPTION FACTOR SHINE 2-RELATED	1346	Vu08	6879456	6880801	PF00847	PTHR31194,PTHR31194:SF13	0	0	GO:0006355,GO:0003700
Vung10460|c7_g2_i2	Vigun01g008000	Vigun01g008000.1	(1 of 2) PTHR10551//PTHR10551:SF13 - FASCIN // SUBFAMILY NOT NAMED	8706	Vu01	952174	960879	PF00150	PTHR10551,PTHR10551:SF13	3.2.1.58	0	GO:0005975,GO:0004553,GO:0051015,GO:0007015
Vung24311|c0_g2_i2	Vigun06g185600	Vigun06g185600.1	(1 of 3) PTHR19139:SF144 - AQUAPORIN NIP1-1-RELATED	2695	Vu06	30488310	30491004	PF00230	PTHR19139,PTHR19139:SF144	0	K09874	GO:0016020,GO:0006810,GO:0005215
Vung49034|c0_g1_i1	Vigun09g127300	Vigun09g127300.1	(1 of 190) PF00847 - AP2 domain (AP2)	1708	Vu09	28279354	28281061	PF00847	PTHR31190	0	0	GO:0006355,GO:0003700
Vung87835|c5_g2_i2	Vigun06g141300	Vigun06g141300.1	(1 of 7) PTHR31388//PTHR31388:SF22 - FAMILY NOT NAMED // PEROXIDASE 22-RELATED	2554	Vu06	26689771	26692324	PF00141	PTHR31388,PTHR31388:SF22	1.11.1.7	K00430	GO:0055114,GO:0020037,GO:0006979,GO:0004601
Vung126452|c3_g1_i10	Vigun09g242700	Vigun09g242700.1	(1 of 301) PF00067 - Cytochrome P450 (p450)	749	Vu09	41181964	41182712	PF00067	PTHR24298,PTHR24298:SF74	0	0	GO:0055114,GO:0020037,GO:0016705,GO:0005506
Vung76977|c0_g1_i2	Vigun05g042500	Vigun05g042500.1	(1 of 3) PTHR23201:SF21 - GIBBERELLIN-REGULATED PROTEIN 4	1545	Vu05	3467657	3469201	PF02704	PTHR23201,PTHR23201:SF21	0	0	0
Vung115541|c1_g5_i6	Vigun03g397200	Vigun03g397200.1	(1 of 2) PTHR22893//PTHR22893:SF67 - NADH OXIDOREDUCTASE-RELATED // 12-OXOPHYTODIENOATE REDUCTASE 3	2015	Vu03	60367807	60369821	PF00724	PTHR22893,PTHR22893:SF67	1.3.1.42	K05894	GO:0055114,GO:0016491,GO:0010181
Vung158281|c0_g1_i1	Vigun02g135600	Vigun02g135600.1	(1 of 4) K13789 - geranylgeranyl diphosphate synthase, type II (GGPS)	1256	Vu02	28546166	28547421	PF00348	PTHR12001,PTHR12001:SF52	2.5.1.29	K13789	GO:0008299
Vung16269|c1_g2_i8	Vigun06g158100	Vigun06g158100.3	(1 of 1) 4.1.1.9 - Malonyl-CoA decarboxylase / Malonyl-CoA carboxy-lyase	6265	Vu06	28152822	28159086	PF05292	PTHR28641,PTHR28641:SF1	4.1.1.9	K01578	GO:0050080,GO:0006633
Vung72693|c0_g1_i1	Vigun07g254800	Vigun07g254800.1	(1 of 1) PTHR23201//PTHR23201:SF15 - EXTENSIN, PROLINE-RICH PROTEIN // GIBBERELLIN-REGULATED PROTEIN 7	820	Vu07	37314425	37315244	PF02704	PTHR23201,PTHR23201:SF15	0	0	0
Vung62857|c0_g1_i1	Vigun06g037400	Vigun06g037400.1	(1 of 3) PTHR31479:SF3 - GB|AAD29063.1	3090	Vu06	15366238	15369327	0	PTHR31479,PTHR31479:SF3	0	0	0
Vung18157|c2_g1_i1	Vigun10g143300	Vigun10g143300.1	(1 of 3) K14506 - jasmonic acid-amino synthetase (JAR1)	10105	Vu10	36041572	36051676	PF03321	PTHR31901,PTHR31901:SF3	0	K14506	GO:0080123,GO:0009864,GO:0009694,GO:0009611
Vung17963|c0_g1_i1	Vigun08g078100	Vigun08g078100.1	0	1008	Vu08	15473959	15474966	0	PTHR35697,PTHR35697:SF1	0	0	0
Vung5346|c0_g1_i1	Vigun05g216000	Vigun05g216000.1	(1 of 2) PTHR31692//PTHR31692:SF5 - FAMILY NOT NAMED // EXPANSIN-B1-RELATED	2698	Vu05	40797261	40799958	PF03330,PF01357	PTHR31692,PTHR31692:SF5	0	0	0
Vung152570|c0_g1_i1	Vigun06g210000	Vigun06g210000.1	(1 of 2) PTHR10891//PTHR10891:SF585 - EF-HAND CALCIUM-BINDING DOMAIN CONTAINING PROTEIN // SUBFAMILY NOT NAMED	1120	Vu06	32312473	32313592	PF13833	PTHR10891,PTHR10891:SF585	0	0	0
Vung15129|c0_g1_i1	Vigun03g348300	Vigun03g348300.1	0	745	Vu03	54834440	54835184	0	PTHR33237,PTHR33237:SF3	0	0	0
Vung111533|c0_g1_i2	Vigun10g157900	Vigun10g157900.1	(1 of 8) PF03242 - Late embryogenesis abundant protein (LEA_3)	1183	Vu10	37729285	37730467	PF03242	PTHR33509,PTHR33509:SF2	0	0	GO:0006950
Vung161149|c2_g1_i7	Vigun10g056700	Vigun10g056700.1	(1 of 18) PTHR24298//PTHR24298:SF61 - FAMILY NOT NAMED // CYTOCHROME P450 81D1-RELATED	2375	Vu10	10433929	10436303	PF00067	PTHR24298,PTHR24298:SF61	0	0	GO:0055114,GO:0020037,GO:0016705,GO:0005506
Vung36697|c0_g2_i1	Vigun02g114100	Vigun02g114100.1	(1 of 6) PTHR27001:SF32 - INTERLEUKIN-1 RECEPTOR-ASSOCIATED KINASE 4 PROTEIN-RELATED	3299	Vu02	26781116	26784414	PF07714	PTHR27001,PTHR27001:SF32	2.7.11.1,2.7.10.2	0	GO:0006468,GO:0004672
Vung109974|c6_g1_i1	Vigun05g252500	Vigun05g252500.2	(1 of 1) PTHR14269:SF15 - HYDROLASE FAMILY PROTEIN / HAD-SUPERFAMILY PROTEIN	6131	Vu05	44713769	44719899	PF13242,PF13344	PTHR14269,PTHR14269:SF15	0	0	0
Vung164194|c0_g2_i1	Vigun01g124700	Vigun01g124700.2	(1 of 8) K10355 - actin, other eukaryote (ACTF)	3687	Vu01	30154789	30158475	PF00022	PTHR11937,PTHR11937:SF255	0	K10355	0
Vung70248|c1_g1_i3	Vigun06g178900	Vigun06g178900.1	(1 of 3) PTHR33077:SF17 - PROTEIN TIFY 5A-RELATED	2169	Vu06	29882683	29884851	PF09425,PF06200	PTHR33077,PTHR33077:SF17	0	0	0
Vung36362|c0_g3_i22	Vigun01g232800	Vigun01g232800.1	(1 of 1) PTHR12620//PTHR12620:SF4 - U2 SNRNP AUXILIARY FACTOR, SMALL SUBUNIT // ZINC FINGER CCCH DOMAIN-CONTAINING PROTEIN 5	7493	Vu01	40473080	40480572	PF13893,PF00642	PTHR12620,PTHR12620:SF4	0	0	GO:0046872,GO:0005634,GO:0003723
Vung161751|c1_g2_i2	Vigun09g178600	Vigun09g178600.3	(1 of 1) K00773 - queuine tRNA-ribosyltransferase [EC:2.4.2.29] (tgt, QTRT1)	8650	Vu09	35088889	35097538	PF01702	PTHR21148,PTHR21148:SF22	2.4.2.29	0	GO:0008616,GO:0008479,GO:0006400
Vung8815|c3_g2_i2	Vigun02g155000	Vigun02g155000.1	(1 of 2) PTHR23042:SF25 - TRANSCRIPTION FACTOR NAI1	2215	Vu02	30153385	30155599	PF00010	PTHR23042,PTHR23042:SF25	0	0	GO:0046983
Vung110394|c0_g1_i3	Vigun06g163900	Vigun06g163900.1	(1 of 2) PTHR11132:SF112 - GLUCOSE-6-PHOSPHATE/PHOSPHATE TRANSLOCATOR 1, CHLOROPLASTIC-RELATED	2343	Vu06	28614303	28616645	PF03151	PTHR11132,PTHR11132:SF112	0	K15283	0
Vung86770|c1_g1_i13	Vigun02g202100	Vigun02g202100.1	(1 of 2) PTHR22765//PTHR22765:SF54 - RING FINGER AND PROTEASE ASSOCIATED DOMAIN-CONTAINING // VACUOLAR-SORTING RECEPTOR 3-RELATED	4440	Vu02	33647005	33651444	PF12662,PF02225	PTHR22765,PTHR22765:SF54	0	0	0
Vung10775|c0_g1_i1	Vigun09g249200	Vigun09g249200.1	(1 of 3) PTHR10438:SF274 - THIOREDOXIN H1	1379	Vu09	41654239	41655617	PF14595	PTHR10438,PTHR10438:SF274	1.6.5.4	K03671	GO:0045454,GO:0015035,GO:0006662
Vung120982|c0_g1_i1	Vigun01g153200	Vigun01g153200.1	(1 of 5) PTHR26374//PTHR26374:SF198 - FAMILY NOT NAMED // ZINC FINGER PROTEIN ZAT11	718	Vu01	33580902	33581619	PF13912	PTHR26374,PTHR26374:SF198	0	0	0
Vung156630|c0_g1_i1	Vigun03g133200	Vigun03g133200.1	(1 of 122) PTHR24078 - DNAJ HOMOLOG SUBFAMILY C MEMBER	750	Vu03	13054939	13055688	PF00226	PTHR24078	0	0	0
Vung108214|c0_g1_i1	Vigun07g013400	Vigun07g013400.1	(1 of 8) PTHR31415:SF4 - HARPIN-INDUCED PROTEIN-LIKE-RELATED	714	Vu07	1216085	1216798	PF03168	PTHR31415,PTHR31415:SF4	0	0	0
Vung163528|c0_g1_i1	Vigun05g014000	Vigun05g014000.1	(1 of 2) PTHR10795//PTHR10795:SF387 - PROPROTEIN CONVERTASE SUBTILISIN/KEXIN // SUBTILISIN-LIKE SERINE PROTEASE-RELATED	3002	Vu05	1105619	1108620	PF05922,PF02225,PF00082	PTHR10795,PTHR10795:SF387	3.4.21.25	0	GO:0006508,GO:0004252
Vung4595|c0_g1_i1	Vigun11g103000	Vigun11g103000.1	(1 of 4) PTHR13935:SF53 - BASIC HELIX-LOOP-HELIX DOMAIN-CONTAINING PROTEIN	1543	Vu11	30014252	30015794	PF00010	PTHR13935,PTHR13935:SF53	0	0	GO:0046983,GO:0003677
Vung51708|c0_g1_i7	Vigun03g105800	Vigun03g105800.1	(1 of 1) PTHR33199//PTHR33199:SF8 - FAMILY NOT NAMED // MACPF DOMAIN-CONTAINING PROTEIN NSL1	4101	Vu03	9121700	9125800	PF01823	PTHR33199,PTHR33199:SF8	0	0	0
Vung135993|c0_g1_i1	Vigun09g050000	Vigun09g050000.1	(1 of 4) PF05512 - AWPM-19-like family (AWPM-19)	1209	Vu09	4924059	4925267	PF05512	PTHR33294	0	0	0
Vung99324|c1_g1_i5	Vigun11g007700	Vigun11g007700.1	(1 of 6) K17095 - annexin A7/11 (ANXA7_11)	2932	Vu11	839623	842554	PF00191	PTHR10502,PTHR10502:SF113	0	K17095	GO:0005544,GO:0005509
Vung132622|c8_g3_i1	Vigun01g067500	Vigun01g067500.1	(1 of 54) PF02298 - Plastocyanin-like domain (Cu_bind_like)	946	Vu01	18160747	18161692	PF02298	PTHR33021,PTHR33021:SF50	0	0	GO:0009055
Vung68533|c0_g1_i4	Vigun01g025600	Vigun01g025600.1	(1 of 1) K00559 - sterol 24-C-methyltransferase (E2.1.1.41, SMT1, ERG6)	5287	Vu01	2930690	2935976	PF08241,PF08498	PTHR10108,PTHR10108:SF908	2.1.1.41	K00559	GO:0008168,GO:0008152,GO:0006694
Vung160797|c0_g1_i11	Vigun09g012800	Vigun09g012800.1	(1 of 1) PTHR10791:SF29 - BIDIRECTIONAL SUGAR TRANSPORTER SWEET16-RELATED	3332	Vu09	954549	957880	PF03083	PTHR10791,PTHR10791:SF29	0	K15382	0
Vung5923|c1_g1_i2	Vigun05g243200	Vigun05g243200.1	(1 of 5) 5.3.3.17 - Trans-2,3-dihydro-3-hydroxyanthranilate isomerase	2642	Vu05	43633822	43636463	PF02567	PTHR13774,PTHR13774:SF17	5.3.3.17	0	GO:0009058,GO:0003824
Vung142247|c0_g1_i2	Vigun01g038000	Vigun01g038000.1	(1 of 20) 1.1.1.195 - Cinnamyl-alcohol dehydrogenase / CAD	1867	Vu01	5058397	5060263	PF01370	PTHR10366,PTHR10366:SF362	1.1.1.195	0	GO:0050662,GO:0003824
Vung112779|c1_g1_i2	Vigun02g012200	Vigun02g012200.1	(1 of 1) PTHR10209//PTHR10209:SF142 - OXIDOREDUCTASE, 2OG-FE II OXYGENASE FAMILY PROTEIN // SUBFAMILY NOT NAMED	1513	Vu02	4676508	4678020	PF03171,PF14226	PTHR10209,PTHR10209:SF142	1.14.11.9	0	GO:0055114,GO:0016491
Vung10925|c0_g1_i4	Vigun02g150400	Vigun02g150400.1	(1 of 2) PTHR31517//PTHR31517:SF3 - FAMILY NOT NAMED // PEROXIDASE 35-RELATED	1713	Vu02	29728929	29730641	PF00141	PTHR31517,PTHR31517:SF3	1.11.1.7	K00430	GO:0055114,GO:0020037,GO:0006979,GO:0004601
Vung73709|c0_g1_i1	Vigun05g234900	Vigun05g234900.1	(1 of 3) PTHR33083//PTHR33083:SF5 - FAMILY NOT NAMED // POLLEN OLE E 1 ALLERGEN AND EXTENSIN FAMILY PROTEIN	823	Vu05	42848930	42849752	PF01190	PTHR33083,PTHR33083:SF5	0	0	0
Vung142882|c0_g2_i1	Vigun02g178400	Vigun02g178400.1	(1 of 2) PTHR11751//PTHR11751:SF380 - SUBGROUP I AMINOTRANSFERASE RELATED // 1-AMINOCYCLOPROPANE-1-CARBOXYLATE SYNTHASE 2-RELATED	2674	Vu02	31962756	31965429	PF00155	PTHR11751,PTHR11751:SF380	4.4.1.14	K01762	GO:0030170,GO:0009058
Vung84083|c1_g1_i1	Vigun02g029900	Vigun02g029900.1	(1 of 4) K16282 - E3 ubiquitin-protein ligase RHA2 [EC:6.3.2.19] (RHA2)	693	Vu02	12433171	12433863	PF13639	PTHR14155,PTHR14155:SF110	0	K16282	GO:0008270,GO:0005515
Vung153373|c1_g1_i2	Vigun09g040200	Vigun09g040200.1	(1 of 2) PTHR33077:SF13 - PROTEIN TIFY 10A-RELATED	2461	Vu09	3619289	3621749	PF09425,PF06200	PTHR33077,PTHR33077:SF13	0	K13464	0
Vung20466|c0_g1_i1	Vigun08g186800	Vigun08g186800.1	(1 of 2) PTHR31339:SF3 - GLYCOSIDE HYDROLASE FAMILY 28 PROTEIN / POLYGALACTURONASE (PECTINASE) FAMILY PROTEIN	4788	Vu08	35600547	35605334	PF12708	PTHR31339,PTHR31339:SF3	0	0	0
Vung13755|c0_g1_i1	Vigun03g435000	Vigun03g435000.2	(1 of 4) K01784 - UDP-glucose 4-epimerase (galE, GALE)	2360	Vu03	63898941	63901300	PF02719	PTHR10366,PTHR10366:SF331	5.1.3.2	0	0
Vung154832|c0_g1_i3	Vigun08g161200	Vigun08g161200.1	(1 of 3) PTHR10209:SF134 - 2-OXOGLUTARATE (2OG) AND FE(II)-DEPENDENT OXYGENASE-LIKE PROTEIN	3103	Vu08	33365251	33368353	PF03171,PF14226	PTHR10209,PTHR10209:SF134	1.14.11.23	0	GO:0055114,GO:0016491
Vung128416|c1_g4_i4	Vigun01g021900	Vigun01g021900.2	(1 of 3) PTHR24089//PTHR24089:SF316 - FAMILY NOT NAMED // ADP,ATP CARRIER PROTEIN 1, MITOCHONDRIAL	3508	Vu01	2321320	2324827	PF00153	PTHR24089,PTHR24089:SF316	0	K05863	0
Vung163479|c2_g1_i5	Vigun03g281300	Vigun03g281300.1	(1 of 3) K14570 - RNA exonuclease 1 (REX1, REXO1, RNH70)	5245	Vu03	46080724	46085968	PF00929	PTHR12801,PTHR12801:SF69	3.1.13.1	K14570	0
Vung119455|c0_g1_i1	Vigun03g295200	Vigun03g295200.2	(1 of 4) K07893 - Ras-related protein Rab-6A (RAB6A)	5443	Vu03	48086345	48091787	PF00025	PTHR24073,PTHR24073:SF474	0	K07893	GO:0005525
Vung44902|c0_g1_i1	Vigun02g182700	Vigun02g182700.1	0	677	Vu02	32295153	32295829	0	PTHR35704	0	0	0
Vung165957|c0_g1_i4	Vigun06g088300	Vigun06g088300.1	(1 of 3) 6.2.1.8 - Oxalate--CoA ligase / Oxalyl-CoA synthetase	3307	Vu06	22067950	22071256	PF13193,PF00501	PTHR24095,PTHR24095:SF171	6.2.1.8	0	GO:0008152,GO:0003824
Vung116133|c3_g1_i1	Vigun06g203600	Vigun06g203600.3	(1 of 1298) 2.7.11.1 - Non-specific serine/threonine protein kinase / Threonine-specific protein kinase	3461	Vu06	31799401	31802861	PF00069	PTHR27006,PTHR27006:SF20	2.7.11.1	0	GO:0006468,GO:0005524,GO:0004672
Vung109220|c0_g1_i4	Vigun07g075800	Vigun07g075800.1	(1 of 4) K10775 - phenylalanine ammonia-lyase (E4.3.1.24)	4866	Vu07	9900198	9905063	PF00221	PTHR10362,PTHR10362:SF19	4.3.1.24	K10775	0
Vung55863|c0_g2_i13	Vigun09g147400	Vigun09g147400.1	(1 of 1) PTHR13832:SF218 - PROTEIN PHOSPHATASE 2C 57	4271	Vu09	31106950	31111220	PF13672	PTHR13832,PTHR13832:SF218	3.1.3.16	0	GO:0006470,GO:0004722
Vung20489|c0_g1_i6	Vigun08g016300	Vigun08g016300.2	(1 of 1) PTHR32227:SF69 - GLYCOSYL HYDROLASE FAMILY 17 PROTEIN	2726	Vu08	1376774	1379499	PF00332	PTHR32227,PTHR32227:SF16	3.2.1.39	0	GO:0005975,GO:0004553
Vung28147|c1_g2_i7	Vigun09g043700	Vigun09g043700.1	(1 of 3) K02881 - large subunit ribosomal protein L18 (RP-L18, MRPL18, rplR)	2198	Vu09	4092169	4094366	PF00861	PTHR12899	0	K02881	GO:0006412,GO:0005840,GO:0005622,GO:0003735
Vung75820|c3_g1_i5	Vigun03g351400	Vigun03g351400.2	(1 of 2) PTHR22595//PTHR22595:SF47 - CHITINASE-RELATED // SUBFAMILY NOT NAMED	1135	Vu03	55292149	55293283	PF03330	PTHR22595,PTHR22595:SF47	0	0	0
Vung76224|c1_g1_i8	Vigun02g202300	Vigun02g202300.1	(1 of 2) K02980 - small subunit ribosomal protein S29e (RP-S29e, RPS29)	1681	Vu02	33656173	33657853	PF00253	PTHR12010,PTHR12010:SF6	0	K02980	GO:0006412,GO:0005840,GO:0005622,GO:0003735
Vung10115|c0_g1_i1	Vigun11g118200	Vigun11g118200.1	0	1631	Vu11	32422578	32424208	0	0	0	0	0
Vung160777|c1_g3_i1	Vigun02g070100	Vigun02g070100.1	(1 of 1) PTHR31238:SF5 - GERMIN-LIKE PROTEIN SUBFAMILY 1 MEMBER 1	651	Vu02	22084745	22085395	PF07883	PTHR31238,PTHR31238:SF5	0	0	0
Vung30234|c0_g1_i2	Vigun08g184200	Vigun08g184200.1	(1 of 2) PTHR31326:SF3 - CRT (CHLOROQUINE-RESISTANCE TRANSPORTER)-LIKE TRANSPORTER 1-RELATED	3665	Vu08	35338169	35341833	PF08627	PTHR31326,PTHR31326:SF3	0	0	0
Vung33384|c0_g1_i1	Vigun01g093100	Vigun01g093100.1	(1 of 2) PTHR12266//PTHR12266:SF2 - NA+/CA2+ K+ INDEPENDENT EXCHANGER // CATION/CALCIUM EXCHANGER 1	2337	Vu01	25523579	25525915	PF01699	PTHR12266,PTHR12266:SF2	0	K13754	GO:0055085,GO:0016021
Vung135206|c0_g1_i1	Vigun03g241100	Vigun03g241100.1	(1 of 4) PTHR26402:SF526 - TWO-COMPONENT RESPONSE REGULATOR ARR15-RELATED	1496	Vu03	40276828	40278323	PF00072	PTHR26402,PTHR26402:SF526	0	K14492	GO:0000160
Vung37401|c0_g1_i1	Vigun03g264600	Vigun03g264600.1	(1 of 3) 2.1.1.274 - Salicylate carboxymethyltransferase / Salicylate O-methyltransferase	1958	Vu03	43384192	43386149	PF03492	PTHR31009,PTHR31009:SF6	2.1.1.274	K08241	GO:0008168
Vung122912|c0_g1_i14	Vigun03g344300	Vigun03g344300.2	(1 of 1) PTHR12565:SF153 - TRANSCRIPTION FACTOR BIM1	7313	Vu03	54345533	54352845	PF00010	PTHR12565,PTHR12565:SF153	0	0	GO:0046983
Vung32101|c1_g1_i3	Vigun06g125800	Vigun06g125800.1	0	1449	Vu06	25302408	25303856	0	PTHR34371,PTHR34371:SF2	0	0	0
Vung30930|c0_g1_i1	Vigun03g370500	Vigun03g370500.1	0	1558	Vu03	57302496	57304053	0	0	0	0	0
Vung131345|c4_g6_i1	Vigun03g141600	Vigun03g141600.1	(1 of 46) 1.3.3.8 - Tetrahydroberberine oxidase / THB oxidase	1798	Vu03	14206695	14208492	PF08031,PF01565	PTHR32448	1.3.3.8	0	GO:0055114,GO:0050660,GO:0016491
Vung137747|c0_g1_i1	Vigun01g242500	Vigun01g242500.1	(1 of 2) PTHR31683//PTHR31683:SF26 - FAMILY NOT NAMED // PECTATE LYASE 5-RELATED	2395	Vu01	41181182	41183576	PF00544	PTHR31683,PTHR31683:SF26	4.2.2.2	K01728	0
Vung31599|c0_g1_i4	Vigun09g008100	Vigun09g008100.1	(1 of 1) PTHR34804:SF1 - CAMP-REGULATED PHOSPHOPROTEIN 19-RELATED PROTEIN	2741	Vu09	629601	632341	PF04667	PTHR34804,PTHR34804:SF1	0	0	0
Vung162229|c0_g1_i1	Vigun03g058500	Vigun03g058500.1	(1 of 10) PF01823 - MAC/Perforin domain (MACPF)	13177	Vu03	4768505	4781681	PF01823	PTHR33199,PTHR33199:SF6	0	0	0
Vung121900|c1_g1_i1	Vigun11g105600	Vigun11g105600.1	(1 of 2) PTHR31692//PTHR31692:SF5 - FAMILY NOT NAMED // EXPANSIN-B1-RELATED	3330	Vu11	30407268	30410597	PF03330,PF01357	PTHR31692,PTHR31692:SF5	0	0	0
Vung18951|c0_g1_i1	Vigun09g171000	Vigun09g171000.1	0	627	Vu09	34063735	34064361	0	PTHR36323	0	0	0
Vung157678|c0_g1_i2	Vigun05g169700	Vigun05g169700.1	(1 of 4) PTHR31568:SF17 - EXPRESSED PROTEIN	982	Vu05	29596743	29597724	PF12734	PTHR31568,PTHR31568:SF17	0	0	0
Vung32604|c1_g2_i2	Vigun03g207600	Vigun03g207600.1	(1 of 3) PTHR11240:SF19 - F7A19.32 PROTEIN-RELATED	1564	Vu03	33947851	33949414	PF00445	PTHR11240,PTHR11240:SF19	3.1.27.1	K01166	GO:0033897,GO:0003723
Vung71813|c0_g1_i1	Vigun01g151500	Vigun01g151500.1	(1 of 5) PTHR31194:SF13 - ETHYLENE-RESPONSIVE TRANSCRIPTION FACTOR SHINE 2-RELATED	1387	Vu01	33417164	33418550	PF00847	PTHR31194,PTHR31194:SF13	0	0	GO:0006355,GO:0003700
Vung61361|c1_g1_i4	Vigun04g095100	Vigun04g095100.1	(1 of 2) PTHR11802//PTHR11802:SF71 - SERINE PROTEASE FAMILY S10 SERINE CARBOXYPEPTIDASE // SERINE CARBOXYPEPTIDASE-LIKE 26-RELATED	4030	Vu04	19781053	19785082	PF00450	PTHR11802,PTHR11802:SF71	3.4.16.6	K16297	GO:0006508,GO:0004185
Vung128871|c0_g1_i1	Vigun02g184200	Vigun02g184200.1	(1 of 2) PTHR31852//PTHR31852:SF22 - FAMILY NOT NAMED // LATE EMBRYOGENESIS ABUNDANT HYDROXYPROLINE-RICH GLYCOPROTEIN	615	Vu02	32408860	32409474	PF03168	PTHR31852,PTHR31852:SF22	0	0	0
Vung149527|c0_g1_i4	Vigun03g356400	Vigun03g356400.1	(1 of 1) KOG4122 - Mitochondrial/chloroplast ribosomal protein L36	1921	Vu03	55773122	55775042	PF00444	PTHR18804,PTHR18804:SF7	0	K02919	GO:0006412,GO:0005840,GO:0005622,GO:0003735
Vung145633|c0_g1_i2	Vigun01g192400	Vigun01g192400.1	(1 of 6) PTHR33509:SF5 - LATE EMBRYOGENESIS ABUNDANT 3 (LEA3) FAMILY PROTEIN	731	Vu01	37040057	37040787	PF03242	PTHR33509,PTHR33509:SF5	0	0	GO:0006950
Vung17271|c0_g2_i1	Vigun07g025200	Vigun07g025200.3	(1 of 8) K10355 - actin, other eukaryote (ACTF)	2951	Vu07	2267805	2270755	PF00022	PTHR11937,PTHR11937:SF255	0	K10355	0
Vung11794|c0_g1_i1	Vigun01g057800	Vigun01g057800.1	(1 of 7) 3.2.2.20 - DNA-3-methyladenine glycosylase I / DNA-3-methyladenine glycosidase I	2738	Vu01	11612514	11615251	PF03352	PTHR31116,PTHR31116:SF6	3.2.2.20	K01246	GO:0008725,GO:0006284
Vung14988|c0_g1_i2	Vigun02g148500	Vigun02g148500.1	(1 of 2) PTHR37209//PTHR37209:SF2 - FAMILY NOT NAMED // LYSINE-RICH ARABINOGALACTAN PROTEIN 17-RELATED	1782	Vu02	29596910	29598691	0	PTHR37209,PTHR37209:SF2	0	0	0
Vung145662|c0_g1_i3	Vigun04g130800	Vigun04g130800.3	0	14930	Vu04	32762797	32777726	0	0	0	0	0
Vung121505|c0_g1_i2	Vigun03g067600	Vigun03g067600.4	(1 of 190) PF00847 - AP2 domain (AP2)	2022	Vu03	5586219	5588240	PF00847	PTHR31190	0	0	GO:0006355,GO:0003700
Vung9905|c6_g6_i6	Vigun05g264900	Vigun05g264900.1	(1 of 2) PTHR22604:SF111 - NAD(P)-BINDING ROSSMANN-FOLD SUPERFAMILY PROTEIN	6643	Vu05	45698913	45705555	PF02894,PF01408	PTHR22604,PTHR22604:SF111	1.1.1.179	0	GO:0055114,GO:0016491,GO:0008152
Vung127353|c2_g1_i4	Vigun06g183600	Vigun06g183600.1	(1 of 8) PTHR22835//PTHR22835:SF177 - ZINC FINGER FYVE DOMAIN CONTAINING PROTEIN // SUBFAMILY NOT NAMED	1421	Vu06	30314904	30316324	PF00657	PTHR22835,PTHR22835:SF177	3.1.1.3	0	GO:0016788
Vung146491|c0_g1_i8	Vigun05g019100	Vigun05g019100.1	(1 of 1) PTHR11732//PTHR11732:SF226 - ALDO/KETO REDUCTASE // SUBFAMILY NOT NAMED	2016	Vu05	1564460	1566475	PF00248	PTHR11732,PTHR11732:SF226	1.1.1.317	0	0
Vung89586|c0_g2_i4	Vigun08g035000	Vigun08g035000.1	(1 of 1) PTHR12276//PTHR12276:SF7 - EPSIN/ENT-RELATED // CLATHRIN INTERACTOR EPSIN 1	7927	Vu08	3366251	3374177	PF01417	PTHR12276,PTHR12276:SF7	0	K12471	0
Vung78992|c0_g1_i1	Vigun03g295300	Vigun03g295300.1	(1 of 109) PF04043 - Plant invertase/pectin methylesterase inhibitor (PMEI)	588	Vu03	48093918	48094505	PF04043	PTHR31707,PTHR31707:SF43	0	0	GO:0004857
Vung34198|c0_g1_i2	Vigun09g010000	Vigun09g010000.1	(1 of 50) PF00407 - Pathogenesis-related protein Bet v I family (Bet_v_1)	2363	Vu09	750199	752561	PF00407	PTHR31213,PTHR31213:SF17	0	0	GO:0009607,GO:0006952
Vung33411|c0_g1_i1	Vigun02g091000	Vigun02g091000.1	0	2213	Vu02	24609039	24611251	0	0	0	0	0
Vung166315|c1_g1_i3	Vigun05g249600	Vigun05g249600.1	(1 of 1) 3.2.1.145//3.2.1.23 - Galactan 1,3-beta-galactosidase // Beta-galactosidase / Lactase	6630	Vu05	44339927	44346556	PF02140,PF01301	PTHR23421,PTHR23421:SF58	3.2.1.145,3.2.1.23	0	GO:0030246,GO:0005975,GO:0004553
Vung5297|c1_g2_i1	Vigun07g170100	Vigun07g170100.1	(1 of 5) 2.3.1.119//2.3.1.199 - Transferred entry: 1.1.1.330, 1.3.1.93, 2.3.1.199 and 4.2.1.134 // Very-long-chain 3-oxoacyl-CoA synthase / Very-long-chain beta-ketoacyl-CoA synthase	2493	Vu07	28437257	28439749	PF08541,PF08392	PTHR31561,PTHR31561:SF25	2.3.1.199,2.3.1.119	K15397	GO:0016747,GO:0008610,GO:0016020,GO:0006633
Vung26585|c2_g1_i3	Vigun06g109700	Vigun06g109700.1	(1 of 12) 2.3.1.196 - Benzyl alcohol O-benzoyltransferase	2037	Vu06	23880716	23882752	PF02458	PTHR31642,PTHR31642:SF9	2.3.1.196	0	GO:0016747
Vung85870|c0_g1_i3	Vigun11g092900	Vigun11g092900.1	(1 of 2) PTHR32285:SF71 - PROTEIN TRICHOME BIREFRINGENCE-LIKE 39-RELATED	3101	Vu11	27501153	27504253	PF14416,PF13839	PTHR32285,PTHR32285:SF71	0	0	0
Vung138657|c2_g1_i10	Vigun04g126600	Vigun04g126600.1	(1 of 3) 4.4.1.4 - Alliin lyase / L-cysteine sulfoxide lyase	3814	Vu04	31951264	31955077	PF04863,PF04864	PTHR11751,PTHR11751:SF126	4.4.1.4	0	GO:0016846
Vung134518|c3_g2_i4	Vigun05g152300	Vigun05g152300.1	(1 of 5) 1.3.1.105 - 2-methylene-furan-3-one reductase / Enone oxidoreductase	3482	Vu05	23674287	23677768	PF08240,PF13602	PTHR11695,PTHR11695:SF530	1.3.1.105	K18980	GO:0055114,GO:0016491,GO:0008270
Vung44351|c3_g4_i1	Vigun02g116700	Vigun02g116700.1	(1 of 5) PTHR31851:SF6 - VACUOLAR IRON TRANSPORTER HOMOLOG 2.1	693	Vu02	26981623	26982315	PF01988	PTHR31851,PTHR31851:SF6	0	0	0
Vung145990|c0_g1_i8	Vigun03g203000	Vigun03g203000.7	(1 of 3) 3.7.1.14 - 2-hydroxy-6-oxonona-2,4-dienedioate hydrolase	15569	Vu03	32515428	32530996	PF12146	PTHR10992,PTHR10992:SF801	0	0	0
Vung34074|c0_g5_i10	Vigun01g126800	Vigun01g126800.3	(1 of 2) PTHR24115//PTHR24115:SF70 - FAMILY NOT NAMED // KINESIN-RELATED PROTEIN 11	21882	Vu01	30395471	30417352	PF00225	PTHR24115,PTHR24115:SF70	3.6.4.4	K11498	GO:0008017,GO:0007018,GO:0005524,GO:0003777,GO:0005871
Vung162906|c4_g1_i15	Vigun06g027000	Vigun06g027000.4	(1 of 2) PTHR24343:SF189 - CBL-INTERACTING SERINE/THREONINE-PROTEIN KINASE 3	8826	Vu06	12106195	12115020	PF03822,PF07714	PTHR24343,PTHR24343:SF189	2.7.11.1	0	GO:0007165,GO:0006468,GO:0004672
Vung162906|c4_g1_i4	Vigun06g027000	Vigun06g027000.4	(1 of 2) PTHR24343:SF189 - CBL-INTERACTING SERINE/THREONINE-PROTEIN KINASE 3	8826	Vu06	12106195	12115020	PF03822,PF07714	PTHR24343,PTHR24343:SF189	2.7.11.1	0	GO:0007165,GO:0006468,GO:0004672
Vung134836|c0_g1_i1	Vigun10g180000	Vigun10g180000.1	(1 of 35) PF05553 - Cotton fibre expressed protein (DUF761)	570	Vu10	39812626	39813195	PF05553	PTHR33265,PTHR33265:SF3	0	0	0
Vung147741|c0_g1_i1	Vigun05g214400	Vigun05g214400.1	(1 of 4) PTHR13935:SF53 - BASIC HELIX-LOOP-HELIX DOMAIN-CONTAINING PROTEIN	839	Vu05	40591285	40592123	0	PTHR13935,PTHR13935:SF53	0	0	GO:0003677
Vung95304|c7_g3_i2	Vigun04g179800	Vigun04g179800.1	(1 of 138) KOG0156 - Cytochrome P450 CYP2 subfamily	2197	Vu04	40361879	40364075	PF00067	PTHR24298,PTHR24298:SF111	0	0	GO:0055114,GO:0020037,GO:0016705,GO:0005506
Vung148378|c0_g2_i1	Vigun08g160600	Vigun08g160600.1	(1 of 7) K05857 - phosphatidylinositol phospholipase C, delta (PLCD)	5645	Vu08	33295838	33301482	PF09279,PF00168,PF00387,PF00388	PTHR10336,PTHR10336:SF92	3.1.4.11	K05857	GO:0005515,GO:0035556,GO:0007165,GO:0006629,GO:0004435
Vung24311|c0_g2_i3	Vigun06g185600	Vigun06g185600.1	(1 of 3) PTHR19139:SF144 - AQUAPORIN NIP1-1-RELATED	2695	Vu06	30488310	30491004	PF00230	PTHR19139,PTHR19139:SF144	0	K09874	GO:0016020,GO:0006810,GO:0005215
Vung115541|c1_g6_i2	Vigun03g397100	Vigun03g397100.1	(1 of 2) PTHR22893//PTHR22893:SF67 - NADH OXIDOREDUCTASE-RELATED // 12-OXOPHYTODIENOATE REDUCTASE 3	3950	Vu03	60349579	60353528	PF00724	PTHR22893,PTHR22893:SF67	1.3.1.42	K05894	GO:0055114,GO:0016491,GO:0010181
Vung83440|c0_g1_i1	Vigun02g140500	Vigun02g140500.2	(1 of 2) PTHR11709//PTHR11709:SF26 - MULTI-COPPER OXIDASE // SUBFAMILY NOT NAMED	3550	Vu02	28935072	28938621	PF07731,PF07732,PF00394	PTHR11709,PTHR11709:SF26	1.10.3.3	0	GO:0055114,GO:0016491,GO:0005507
Vung108032|c0_g2_i1	Vigun09g009700	Vigun09g009700.1	(1 of 50) PF00407 - Pathogenesis-related protein Bet v I family (Bet_v_1)	1176	Vu09	741936	743111	PF00407	PTHR31213,PTHR31213:SF11	0	0	GO:0009607,GO:0006952
Vung129710|c0_g1_i1	VigunL007700	VigunL007700.1	0	900	contig_155	11198	12097	0	PTHR36795,PTHR36795:SF2	0	0	0
Vung123751|c0_g1_i1	Vigun05g191300	Vigun05g191300.1	0	606	Vu05	37175389	37175994	0	0	0	0	0
Vung168171|c0_g1_i2	Vigun06g097200	Vigun06g097200.1	(1 of 1) PTHR27007:SF47 - L-TYPE LECTIN-DOMAIN CONTAINING RECEPTOR KINASE VIII.1-RELATED	2037	Vu06	22845899	22847935	PF00069,PF00139	PTHR27007,PTHR27007:SF47	2.7.11.1	0	GO:0006468,GO:0005524,GO:0004672,GO:0030246
Vung71238|c0_g1_i1	Vigun02g135600	Vigun02g135600.1	(1 of 4) K13789 - geranylgeranyl diphosphate synthase, type II (GGPS)	1256	Vu02	28546166	28547421	PF00348	PTHR12001,PTHR12001:SF52	2.5.1.29	K13789	GO:0008299
Vung111890|c3_g5_i5	Vigun05g136700	Vigun05g136700.3	(1 of 6) PTHR13992:SF25 - MEDIATOR OF RNA POLYMERASE II TRANSCRIPTION SUBUNIT 12	13115	Vu05	16451240	16464354	PF09497	PTHR13992,PTHR13992:SF25	0	0	GO:0016592,GO:0006357,GO:0001104
Vung147967|c0_g2_i4	Vigun04g009000	Vigun04g009000.2	(1 of 1) PTHR13872//PTHR13872:SF1 - 60S RIBOSOMAL PROTEIN L35 // DOLICHYL-DIPHOSPHOOLIGOSACCHARIDE--PROTEIN GLYCOSYLTRANSFERASE SUBUNIT STT3B	9000	Vu04	661354	670353	PF02516	PTHR13872,PTHR13872:SF1	2.4.99.18	K07151	GO:0016020,GO:0006486,GO:0004576
Vung100756|c0_g1_i1	Vigun06g111200	Vigun06g111200.1	(1 of 2) PTHR21654//PTHR21654:SF22 - FAMILY NOT NAMED // TRIHELIX TRANSCRIPTION FACTOR GTL2	2684	Vu06	24012860	24015543	PF13837	PTHR21654,PTHR21654:SF22	0	0	0
Vung112779|c0_g1_i1	Vigun02g012200	Vigun02g012200.1	(1 of 1) PTHR10209//PTHR10209:SF142 - OXIDOREDUCTASE, 2OG-FE II OXYGENASE FAMILY PROTEIN // SUBFAMILY NOT NAMED	1513	Vu02	4676508	4678020	PF03171,PF14226	PTHR10209,PTHR10209:SF142	1.14.11.9	0	GO:0055114,GO:0016491
Vung29209|c0_g1_i2	Vigun05g043700	Vigun05g043700.1	(1 of 9) PF03007//PF06974 - Wax ester synthase-like Acyl-CoA acyltransferase domain (WES_acyltransf) // Protein of unknown function (DUF1298) (DUF1298)	2796	Vu05	3623448	3626243	PF03007,PF06974	PTHR31650,PTHR31650:SF7	0	0	GO:0045017,GO:0004144
Vung33668|c0_g1_i2	Vigun05g234100	Vigun05g234100.1	0	3781	Vu05	42786407	42790187	0	PTHR34564	0	0	0
Vung4883|c3_g1_i1	Vigun04g096500	Vigun04g096500.1	(1 of 4) K03231 - elongation factor 1-alpha (EEF1A)	3122	Vu04	20546618	20549739	PF03144,PF03143,PF00009	PTHR23115,PTHR23115:SF157	3.6.5.3	K03231	GO:0005525
Vung53884|c1_g2_i3	Vigun01g148900	Vigun01g148900.2	(1 of 1) K17985 - activating molecule in BECN1-regulated autophagy protein 1 (AMBRA1)	8492	Vu01	33031567	33040058	PF00400	PTHR22874,PTHR22874:SF4	0	K17985	GO:0005515
Vung13583|c0_g1_i1	Vigun10g186800	Vigun10g186800.1	(1 of 13) PTHR19241//PTHR19241:SF219 - ATP-BINDING CASSETTE TRANSPORTER // ABC TRANSPORTER G FAMILY MEMBER 38	7101	Vu10	40295987	40303087	PF14510,PF08370,PF00005,PF01061	PTHR19241,PTHR19241:SF219	0	0	GO:0016887,GO:0005524,GO:0016020
Vung21996|c0_g1_i1	Vigun02g185200	Vigun02g185200.1	(1 of 1) PTHR31985//PTHR31985:SF3 - FAMILY NOT NAMED // ETHYLENE-RESPONSIVE TRANSCRIPTION FACTOR ERF019-RELATED	531	Vu02	32471580	32472110	PF00847	PTHR31985,PTHR31985:SF3	0	0	GO:0006355,GO:0003700
Vung4299|c1_g3_i16	Vigun08g098400	Vigun08g098400.1	(1 of 3) PTHR17985//PTHR17985:SF13 - SER/THR-RICH PROTEIN T10 IN DGCR REGION // SUBFAMILY NOT NAMED	7797	Vu08	23806204	23814000	PF05742	PTHR17985,PTHR17985:SF13	0	0	0
Vung157678|c0_g2_i2	Vigun07g101100	Vigun07g101100.1	(1 of 4) PTHR31568:SF17 - EXPRESSED PROTEIN	865	Vu07	17891206	17892070	PF12734	PTHR31568,PTHR31568:SF17	0	0	0
Vung4299|c1_g3_i15	Vigun08g098400	Vigun08g098400.1	(1 of 3) PTHR17985//PTHR17985:SF13 - SER/THR-RICH PROTEIN T10 IN DGCR REGION // SUBFAMILY NOT NAMED	7797	Vu08	23806204	23814000	PF05742	PTHR17985,PTHR17985:SF13	0	0	0
Vung46669|c0_g1_i1	Vigun01g020300	Vigun01g020300.1	0	539	Vu01	2165671	2166209	0	PTHR33659	0	0	0
Vung69265|c0_g1_i4	Vigun06g107200	Vigun06g107200.1	(1 of 4) PTHR20863//PTHR20863:SF29 - ACYL CARRIER PROTEIN/ZINC FINGER PROTEIN 593-RELATED // ACYL CARRIER PROTEIN 1, CHLOROPLASTIC-RELATED	2456	Vu06	23660784	23663239	PF00550	PTHR20863,PTHR20863:SF29	0	0	0
Vung72470|c0_g1_i1	Vigun07g257900	Vigun07g257900.1	(1 of 2) K13692 - UDP-glucose:(indol-3-yl)acetate beta-D-glucosyltransferase [EC:2.4.1.121] Glc b1- IAA (IAGLU)	1881	Vu07	37514753	37516633	PF00201	PTHR11926,PTHR11926:SF285	0	K13692	GO:0016758,GO:0008152
Vung109385|c0_g1_i1	Vigun03g184600	Vigun03g184600.1	(1 of 12) PF07816 - Protein of unknown function (DUF1645) (DUF1645)	924	Vu03	24173983	24174906	PF07816	PTHR33095,PTHR33095:SF11	0	0	0
Vung1378|c4_g5_i2	Vigun08g221300	Vigun08g221300.2	(1 of 2) PTHR10766//PTHR10766:SF44 - TRANSMEMBRANE 9 SUPERFAMILY PROTEIN // ENDOMEMBRANE FAMILY PROTEIN 70	3925	Vu08	37981748	37985672	PF02990	PTHR10766,PTHR10766:SF44	0	K17086	GO:0016021
Vung4595|c0_g1_i2	Vigun11g103000	Vigun11g103000.1	(1 of 4) PTHR13935:SF53 - BASIC HELIX-LOOP-HELIX DOMAIN-CONTAINING PROTEIN	1543	Vu11	30014252	30015794	PF00010	PTHR13935,PTHR13935:SF53	0	0	GO:0046983,GO:0003677
Vung100235|c1_g2_i6	Vigun03g312900	Vigun03g312900.1	(1 of 1) 2.7.7.73 - Sulfur carrier protein ThiS adenylyltransferase	5524	Vu03	50580150	50585673	PF00899	PTHR10953,PTHR10953:SF9	2.7.7.73	K12164	GO:0008641
Vung133666|c1_g1_i1	Vigun03g033100	Vigun03g033100.1	(1 of 2) K09490 - heat shock 70kDa protein 5 (HSPA5, BIP)	3919	Vu03	2546244	2550162	PF00012	PTHR19375,PTHR19375:SF228	0	K09490	0
Vung144153|c0_g1_i2	Vigun03g317000	Vigun03g317000.1	(1 of 2) PTHR31683//PTHR31683:SF28 - FAMILY NOT NAMED // PECTATE LYASE 22-RELATED	1947	Vu03	51115542	51117488	PF00544	PTHR31683,PTHR31683:SF28	4.2.2.2	K01728	0
Vung154931|c4_g5_i1	Vigun06g111200	Vigun06g111200.1	(1 of 2) PTHR21654//PTHR21654:SF22 - FAMILY NOT NAMED // TRIHELIX TRANSCRIPTION FACTOR GTL2	2684	Vu06	24012860	24015543	PF13837	PTHR21654,PTHR21654:SF22	0	0	0
Vung131571|c1_g1_i9	Vigun02g089700	Vigun02g089700.1	(1 of 2) 4.1.1.32//4.1.1.49 - Phosphoenolpyruvate carboxykinase (GTP) / Phosphopyruvate carboxylase // Phosphoenolpyruvate carboxykinase (ATP) / Phosphopyruvate carboxylase	6190	Vu02	24459995	24466184	PF01293	PTHR30031,PTHR30031:SF4	4.1.1.49,4.1.1.32	K01610	GO:0006094,GO:0005524,GO:0004612
Vung23124|c1_g1_i11	Vigun03g302000	Vigun03g302000.1	(1 of 11) PF14389 - Leucine-zipper of ternary complex factor MIP1 (Lzipper-MIP1)	3656	Vu03	49146500	49150155	PF14389	PTHR23054,PTHR23054:SF26	0	0	0
Vung512|c0_g1_i1	Vigun09g026200	Vigun09g026200.1	(1 of 14) K01535 - H+-transporting ATPase (E3.6.3.6)	7707	Vu09	2052870	2060576	PF00690,PF00702,PF00122	PTHR24093,PTHR24093:SF361	3.6.3.6	K01535	GO:0046872,GO:0000166
Vung123265|c2_g4_i2	Vigun05g112200	Vigun05g112200.2	(1 of 6) PTHR11260//PTHR11260:SF314 - GLUTATHIONE S-TRANSFERASE, GST, SUPERFAMILY, GST DOMAIN CONTAINING // SUBFAMILY NOT NAMED	1401	Vu05	11764685	11766085	PF00043,PF02798	PTHR11260,PTHR11260:SF314	2.5.1.18	K00799	GO:0005515
Vung135565|c0_g3_i20	Vigun03g247300	Vigun03g247300.1	(1 of 4) PTHR31651//PTHR31651:SF5 - FAMILY NOT NAMED // AUXIN EFFLUX CARRIER FAMILY PROTEIN-RELATED	4764	Vu03	41100066	41104829	PF03547	PTHR31651,PTHR31651:SF5	0	0	GO:0055085,GO:0016021
Vung43452|c3_g4_i9	Vigun01g056100	Vigun01g056100.1	(1 of 1) 1.2.1.24 - Succinate-semialdehyde dehydrogenase (NAD(+))	18827	Vu01	11005603	11024429	PF00171	PTHR11699,PTHR11699:SF49	1.2.1.24	K17761	GO:0055114,GO:0016491,GO:0008152
Vung107930|c0_g2_i2	Vigun07g193000	Vigun07g193000.1	(1 of 1) PTHR31658:SF0 - CONSERVED OLIGOMERIC GOLGI COMPLEX SUBUNIT 1	9393	Vu07	31202765	31212157	PF08700	PTHR31658,PTHR31658:SF0	0	0	0
Vung39092|c1_g1_i2	Vigun04g106700	Vigun04g106700.1	(1 of 2) PTHR12629:SF11 - NUDIX HYDROLASE 12, MITOCHONDRIAL	5856	Vu04	25673357	25679212	PF00293	PTHR12629,PTHR12629:SF11	0	K07766	GO:0016787
Vung71539|c0_g2_i1	Vigun04g051300	Vigun04g051300.1	(1 of 2) PTHR12565:SF172 - BHLH TRANSCRIPTION FACTOR PRE1-RELATED	2290	Vu04	4619336	4621625	PF00010	PTHR12565,PTHR12565:SF172	0	0	GO:0046983
Vung120496|c0_g3_i13	Vigun03g449100	Vigun03g449100.1	(1 of 1) K12839 - survival of motor neuron-related-splicing factor 30 (SMNDC1, SPF30)	5554	Vu03	65009374	65014927	PF06003	0	0	K12839	GO:0006397,GO:0005737,GO:0005634,GO:0003723
Vung143644|c0_g1_i2	Vigun05g013300	Vigun05g013300.1	(1 of 5) PTHR19375:SF232 - MEDIATOR OF RNA POLYMERASE II TRANSCRIPTION SUBUNIT 37E-RELATED	3014	Vu05	1053294	1056307	PF00012	PTHR19375,PTHR19375:SF232	0	K03283	0
Vung164859|c0_g1_i1	Vigun01g020600	Vigun01g020600.1	0	598	Vu01	2182316	2182913	0	PTHR33659,PTHR33659:SF3	0	0	0
Vung99763|c0_g1_i1	Vigun07g219100	Vigun07g219100.2	(1 of 7) PTHR24223//PTHR24223:SF192 - FAMILY NOT NAMED // ABC TRANSPORTER C FAMILY MEMBER 10	7537	Vu07	34185492	34193028	PF00664,PF00005	PTHR24223,PTHR24223:SF192	3.6.3.44	0	GO:0055085,GO:0042626,GO:0016021,GO:0006810,GO:0005524,GO:0016887
Vung150764|c0_g2_i2	Vigun03g261000	Vigun03g261000.1	(1 of 1) 3.4.16.2//3.4.21.26 - Lysosomal Pro-Xaa carboxypeptidase / Prolyl carboxypeptidase // Prolyl oligopeptidase / Prolyl endopeptidase	4929	Vu03	42777848	42782776	PF05577	PTHR11010,PTHR11010:SF42	3.4.16.2	0	GO:0008236,GO:0006508
Vung23472|c0_g1_i6	Vigun07g089200	Vigun07g089200.3	(1 of 1) PTHR11712//PTHR11712:SF275 - POLYKETIDE SYNTHASE-RELATED // 3-OXOACYL-[ACYL-CARRIER-PROTEIN] SYNTHASE, MITOCHONDRIAL	4054	Vu07	13877157	13881210	PF00109	PTHR11712,PTHR11712:SF275	2.3.1.41	0	0
Vung156259|c2_g1_i5	Vigun02g189900	Vigun02g189900.1	(1 of 2) PTHR24096:SF169 - 4-COUMARATE--COA LIGASE 3	4257	Vu02	32767087	32771343	PF13193,PF00501	PTHR24096,PTHR24096:SF169	6.2.1.34,6.2.1.12	K01904	GO:0008152,GO:0003824
Vung76977|c0_g1_i5	Vigun05g042500	Vigun05g042500.1	(1 of 3) PTHR23201:SF21 - GIBBERELLIN-REGULATED PROTEIN 4	1545	Vu05	3467657	3469201	PF02704	PTHR23201,PTHR23201:SF21	0	0	0
Vung96144|c0_g1_i1	Vigun09g166100	Vigun09g166100.1	0	2460	Vu09	33380467	33382926	0	PTHR35995	0	0	0
Vung146561|c0_g6_i4	Vigun08g019400	Vigun08g019400.1	(1 of 2) PTHR16092 - SEC3/SYNTAXIN-RELATED	15990	Vu08	1638725	1654714	PF04129,PF15277	PTHR16092,PTHR16092:SF21	0	0	0
Vung15156|c2_g1_i1	Vigun06g101700	Vigun06g101700.2	(1 of 24) 1.13.11.58 - Linoleate 9S-lipoxygenase / Linoleate 9-lipoxygenase	5501	Vu06	23190983	23196483	PF01477,PF00305	PTHR11771,PTHR11771:SF48	1.13.11.58	K15718	GO:0005515,GO:0055114,GO:0046872,GO:0016702
Vung28477|c0_g1_i1	Vigun01g205800	Vigun01g205800.1	(1 of 5) PTHR21562:SF5 - PECTINACETYLESTERASE FAMILY PROTEIN	4049	Vu01	38156910	38160958	PF03283	PTHR21562,PTHR21562:SF5	0	0	GO:0016787
Vung96113|c0_g1_i1	Vigun07g272800	Vigun07g272800.1	(1 of 6) PTHR21576//PTHR21576:SF40 - UNCHARACTERIZED NODULIN-LIKE PROTEIN // SUBFAMILY NOT NAMED	2220	Vu07	38829952	38832171	PF06813	PTHR21576,PTHR21576:SF40	0	0	0
Vung152958|c2_g2_i3	Vigun01g151800	Vigun01g151800.1	(1 of 5) PTHR24320:SF81 - NAD(P)-BINDING ROSSMANN-FOLD SUPERFAMILY PROTEIN	4899	Vu01	33474128	33479026	PF00106	PTHR24320,PTHR24320:SF81	1.1.1.330	0	GO:0016491,GO:0008152
Vung74310|c2_g3_i4	Vigun08g021800	Vigun08g021800.2	(1 of 11) 3.1.1.26 - Galactolipase	2745	Vu08	1908611	1911355	PF01734	PTHR32176	3.1.1.26	0	GO:0006629
Vung79203|c0_g1_i1	Vigun06g163900	Vigun06g163900.1	(1 of 2) PTHR11132:SF112 - GLUCOSE-6-PHOSPHATE/PHOSPHATE TRANSLOCATOR 1, CHLOROPLASTIC-RELATED	2343	Vu06	28614303	28616645	PF03151	PTHR11132,PTHR11132:SF112	0	K15283	0
Vung134383|c1_g1_i5	Vigun10g072700	Vigun10g072700.1	(1 of 1) PTHR33649//PTHR33649:SF4 - FAMILY NOT NAMED // PAR1 PROTEIN	2755	Vu10	18330886	18333640	PF06521	PTHR33649,PTHR33649:SF4	0	0	0
Vung26585|c2_g1_i1	Vigun06g109300	Vigun06g109300.1	(1 of 12) 2.3.1.196 - Benzyl alcohol O-benzoyltransferase	4433	Vu06	23841610	23846042	PF02458	PTHR31642,PTHR31642:SF9	2.3.1.196	0	GO:0016747
Vung5297|c1_g1_i1	Vigun07g170100	Vigun07g170100.1	(1 of 5) 2.3.1.119//2.3.1.199 - Transferred entry: 1.1.1.330, 1.3.1.93, 2.3.1.199 and 4.2.1.134 // Very-long-chain 3-oxoacyl-CoA synthase / Very-long-chain beta-ketoacyl-CoA synthase	2493	Vu07	28437257	28439749	PF08541,PF08392	PTHR31561,PTHR31561:SF25	2.3.1.199,2.3.1.119	K15397	GO:0016747,GO:0008610,GO:0016020,GO:0006633
Vung7733|c0_g2_i1	Vigun11g173600	Vigun11g173600.1	(1 of 5) PTHR23500//PTHR23500:SF109 - FAMILY NOT NAMED // POLYOL TRANSPORTER 5	2367	Vu11	37887571	37889937	PF00083	PTHR23500,PTHR23500:SF109	0	0	GO:0055085,GO:0022857,GO:0016021
Vung74310|c2_g3_i2	Vigun08g021800	Vigun08g021800.2	(1 of 11) 3.1.1.26 - Galactolipase	2745	Vu08	1908611	1911355	PF01734	PTHR32176	3.1.1.26	0	GO:0006629
Vung124422|c0_g2_i3	Vigun08g091900	Vigun08g091900.1	(1 of 1) PTHR16875:SF0 - SELENOPROTEIN K	3820	Vu08	21437556	21441375	PF10961	PTHR16875,PTHR16875:SF0	0	0	0
Vung40932|c1_g1_i22	Vigun05g277600	Vigun05g277600.1	(1 of 2) PTHR11014//PTHR11014:SF55 - PEPTIDASE M20 FAMILY MEMBER // IAA-AMINO ACID HYDROLASE ILR1-LIKE 1-RELATED	3009	Vu05	46714482	46717490	PF07687,PF01546	PTHR11014,PTHR11014:SF55	0	K14664	GO:0016787,GO:0008152
Vung43510|c0_g1_i1	Vigun06g188600	Vigun06g188600.1	0	483	Vu06	30692382	30692864	0	PTHR33472,PTHR33472:SF4	0	0	0
Vung146491|c0_g1_i9	Vigun05g019100	Vigun05g019100.1	(1 of 1) PTHR11732//PTHR11732:SF226 - ALDO/KETO REDUCTASE // SUBFAMILY NOT NAMED	2016	Vu05	1564460	1566475	PF00248	PTHR11732,PTHR11732:SF226	1.1.1.317	0	0
Vung36742|c0_g3_i1	Vigun01g088500	Vigun01g088500.2	0	3175	Vu01	24689992	24693166	0	0	0	0	0
Vung167643|c0_g1_i9	Vigun10g161900	Vigun10g161900.1	(1 of 9) K13464 - jasmonate ZIM domain-containing protein (JAZ)	2449	Vu10	38075598	38078046	PF09425,PF06200	PTHR33077	0	K13464	0
Vung31392|c0_g1_i1	Vigun09g263200	Vigun09g263200.1	(1 of 2) K16290 - xylem cysteine proteinase [EC:3.4.22.-] (XCP)	1577	Vu09	42759939	42761515	PF08246,PF00112	PTHR12411,PTHR12411:SF357	3.4.22.6	K16290	GO:0008234,GO:0006508
Vung49389|c0_g2_i3	Vigun01g015600	Vigun01g015600.1	(1 of 1) 1.14.13.173//1.14.13.37 - 11-oxo-beta-amyrin 30-oxidase / CYP72A154 // Methyltetrahydroprotoberberine 14-monooxygenase / Methyltetrahydroprotoberberine 14-hydroxylase	17894	Vu01	1681302	1699195	PF00067	PTHR24286,PTHR24286:SF64	1.14.13.37	0	GO:0055114,GO:0020037,GO:0016705,GO:0005506
Vung29209|c0_g1_i1	Vigun05g043700	Vigun05g043700.1	(1 of 9) PF03007//PF06974 - Wax ester synthase-like Acyl-CoA acyltransferase domain (WES_acyltransf) // Protein of unknown function (DUF1298) (DUF1298)	2796	Vu05	3623448	3626243	PF03007,PF06974	PTHR31650,PTHR31650:SF7	0	0	GO:0045017,GO:0004144
Vung71565|c0_g1_i1	Vigun07g000600	Vigun07g000600.1	(1 of 12) 2.3.1.196 - Benzyl alcohol O-benzoyltransferase	2048	Vu07	63727	65774	PF02458	PTHR31642,PTHR31642:SF9	2.3.1.196	0	GO:0016747
Vung124557|c1_g1_i4	Vigun07g190500	Vigun07g190500.2	(1 of 2) K05236 - coatomer protein complex, subunit alpha (xenin) (COPA)	5949	Vu07	30887612	30893560	PF00400,PF04053,PF06957	PTHR19876,PTHR19876:SF7	0	K05236	GO:0005515,GO:0030117,GO:0016192,GO:0006886,GO:0005198,GO:0030126
Vung148714|c0_g1_i1	Vigun08g194900	Vigun08g194900.1	(1 of 2) PTHR12300//PTHR12300:SF27 - HVA22-LIKE PROTEINS // HVA22-LIKE PROTEIN F	1056	Vu08	36119211	36120266	PF03134	PTHR12300,PTHR12300:SF27	0	K17279	0
Vung153459|c0_g1_i1	Vigun09g140800	Vigun09g140800.1	0	1015	Vu09	30287361	30288375	0	PTHR33641,PTHR33641:SF3	0	0	0
Vung153480|c0_g1_i1	Vigun09g081500	Vigun09g081500.1	0	469	Vu09	9732562	9733030	0	PTHR33386	0	0	0
Vung24706|c0_g2_i1	Vigun11g118300	Vigun11g118300.1	0	1103	Vu11	32437778	32438880	0	0	0	0	0
Vung93010|c0_g1_i2	Vigun07g218500	Vigun07g218500.1	0	2051	Vu07	34101035	34103085	0	0	0	0	0
Vung129853|c2_g1_i4	Vigun05g025800	Vigun05g025800.1	(1 of 4) K14207 - solute carrier family 38 (sodium-coupled neutral amino acid transporter), member 2 (SLC38A2, SNAT2)	4168	Vu05	2097762	2101929	PF03222	PTHR22950,PTHR22950:SF288	0	K14207	GO:0003333
Vung145188|c0_g1_i1	Vigun08g196800	Vigun08g196800.1	0	468	Vu08	36265374	36265841	0	PTHR35131,PTHR35131:SF1	0	0	0
Vung164969|c0_g1_i1	Vigun09g148900	Vigun09g148900.2	(1 of 2) PTHR32295:SF33 - PROTEIN IQ-DOMAIN 21	3831	Vu09	31225495	31229325	PF13178,PF00612	PTHR32295,PTHR32295:SF33	0	0	GO:0005515
Vung135825|c0_g1_i1	Vigun02g120300	Vigun02g120300.1	(1 of 9) PTHR22835:SF184 - GDSL ESTERASE/LIPASE EXL1-RELATED	2900	Vu02	27288659	27291558	PF00657	PTHR22835,PTHR22835:SF184	3.1.1.3	0	GO:0016788
Vung74543|c1_g1_i1	Vigun03g291000	Vigun03g291000.1	(1 of 7) K07374 - tubulin alpha (TUBA)	2744	Vu03	47415906	47418649	PF03953,PF00091	PTHR11588,PTHR11588:SF101	0	K07374	GO:0003924,GO:0007017,GO:0005874
Vung106923|c0_g1_i1	Vigun03g251500	Vigun03g251500.1	(1 of 1) PTHR21152//PTHR21152:SF1 - AMINOTRANSFERASE CLASS V // PHOSPHOSERINE AMINOTRANSFERASE	5949	Vu03	41769964	41775912	PF00266	PTHR21152,PTHR21152:SF1	2.6.1.52	K00831	0
Vung52592|c0_g2_i1	Vigun10g186800	Vigun10g186800.1	(1 of 13) PTHR19241//PTHR19241:SF219 - ATP-BINDING CASSETTE TRANSPORTER // ABC TRANSPORTER G FAMILY MEMBER 38	7101	Vu10	40295987	40303087	PF14510,PF08370,PF00005,PF01061	PTHR19241,PTHR19241:SF219	0	0	GO:0016887,GO:0005524,GO:0016020
Vung150138|c2_g1_i1	Vigun05g253400	Vigun05g253400.1	(1 of 6) PTHR11177//PTHR11177:SF190 - CHITINASE // SUBFAMILY NOT NAMED	795	Vu05	44796877	44797671	0	PTHR11177,PTHR11177:SF190	3.2.1.14	0	0
Vung167362|c0_g1_i1	Vigun03g093300	Vigun03g093300.1	(1 of 3) PTHR22835//PTHR22835:SF120 - ZINC FINGER FYVE DOMAIN CONTAINING PROTEIN // SUBFAMILY NOT NAMED	2699	Vu03	7884679	7887377	PF00657	PTHR22835,PTHR22835:SF120	3.1.1.3	0	GO:0016788
Vung110759|c0_g1_i7	Vigun10g128000	Vigun10g128000.1	(1 of 1) PTHR27001//PTHR27001:SF126 - FAMILY NOT NAMED // BR-SIGNALING KINASE 3-RELATED	7670	Vu10	33598776	33606445	PF13414,PF07714	PTHR27001,PTHR27001:SF126	2.7.11.1,2.7.10.2	K14500	GO:0006468,GO:0004672
Vung90847|c1_g1_i7	Vigun10g167200	Vigun10g167200.2	(1 of 1) PF06741//PF14438 - LsmAD domain (LsmAD) // Ataxin 2 SM domain (SM-ATX)	9319	Vu10	38620264	38629582	PF14438,PF06741	PTHR12854	0	0	0
Vung39147|c0_g1_i4	Vigun02g101500	Vigun02g101500.2	(1 of 1) PTHR10108:SF844 - METHYLTRANSFERASE PMT21-RELATED	5007	Vu02	25615231	25620237	PF03141	PTHR10108,PTHR10108:SF844	2.1.1.41	0	GO:0008168
Vung163254|c0_g1_i1	Vigun02g091000	Vigun02g091000.1	0	2213	Vu02	24609039	24611251	0	0	0	0	0
Vung159685|c2_g1_i14	Vigun05g221000	Vigun05g221000.4	(1 of 2) PTHR10332:SF30 - EQUILIBRATIVE NUCLEOTIDE TRANSPORTER 2	4134	Vu05	41240176	41244309	PF01733	PTHR10332,PTHR10332:SF30	0	0	GO:0016021,GO:0006810,GO:0005337
Vung4170|c0_g1_i1	Vigun05g208500	Vigun05g208500.1	(1 of 6) K01595 - phosphoenolpyruvate carboxylase (ppc)	5064	Vu05	39925692	39930755	PF00311	PTHR30523,PTHR30523:SF8	4.1.1.31	K01595	GO:0015977,GO:0008964,GO:0006099
Vung34118|c0_g2_i1	Vigun02g186300	Vigun02g186300.2	(1 of 2) K08738 - cytochrome c (CYC)	3442	Vu02	32536463	32539904	PF00034	PTHR11961,PTHR11961:SF8	0	K08738	GO:0020037,GO:0009055
Vung84750|c6_g2_i14	Vigun01g010600	Vigun01g010600.2	(1 of 3) PTHR10366//PTHR10366:SF352 - NAD DEPENDENT EPIMERASE/DEHYDRATASE // SUBFAMILY NOT NAMED	4360	Vu01	1204172	1208531	PF05368	PTHR10366,PTHR10366:SF352	0	0	0
Vung8815|c3_g1_i1	Vigun09g127300	Vigun09g127300.1	(1 of 190) PF00847 - AP2 domain (AP2)	1708	Vu09	28279354	28281061	PF00847	PTHR31190	0	0	GO:0006355,GO:0003700
Vung24252|c0_g1_i3	Vigun02g012000	Vigun02g012000.1	(1 of 2) 2.3.1.16 - Acetyl-CoA C-acyltransferase / Beta-ketothiolase	5794	Vu02	4596528	4602321	PF02803,PF00108	PTHR18919,PTHR18919:SF93	2.3.1.16	K07513	GO:0016747,GO:0008152
Vung59633|c0_g2_i1	Vigun08g181100	Vigun08g181100.1	(1 of 3) PTHR11413//PTHR11413:SF57 - CYSTATIN FAMILY MEMBER // SUBFAMILY NOT NAMED	1584	Vu08	35064675	35066258	PF16845,PF00031	PTHR11413,PTHR11413:SF57	0	0	GO:0004869
Vung67280|c0_g1_i1	Vigun05g067400	Vigun05g067400.1	(1 of 7) PF00228 - Bowman-Birk serine protease inhibitor family (Bowman-Birk_leg)	433	Vu05	5826351	5826783	PF00228	PTHR33479,PTHR33479:SF1	0	0	GO:0005576,GO:0004867
Vung32604|c1_g2_i1	Vigun03g207600	Vigun03g207600.1	(1 of 3) PTHR11240:SF19 - F7A19.32 PROTEIN-RELATED	1564	Vu03	33947851	33949414	PF00445	PTHR11240,PTHR11240:SF19	3.1.27.1	K01166	GO:0033897,GO:0003723
Vung36368|c0_g2_i1	Vigun01g252000	Vigun01g252000.1	(1 of 1) PTHR33136:SF10 - PROTEIN RALF-LIKE 24-RELATED	1938	Vu01	41823897	41825834	PF05498	PTHR33136,PTHR33136:SF10	0	0	0
Vung8815|c5_g1_i1	Vigun09g127300	Vigun09g127300.1	(1 of 190) PF00847 - AP2 domain (AP2)	1708	Vu09	28279354	28281061	PF00847	PTHR31190	0	0	GO:0006355,GO:0003700
Vung164701|c2_g1_i3	Vigun10g162800	Vigun10g162800.1	(1 of 3) PTHR21493//PTHR21493:SF121 - CGI-141-RELATED/LIPASE CONTAINING PROTEIN // LIPASE CLASS 3 FAMILY PROTEIN	6408	Vu10	38188472	38194879	PF03893,PF01764	PTHR21493,PTHR21493:SF121	0	0	GO:0016042,GO:0006629
Vung19147|c0_g1_i1	Vigun08g168500	Vigun08g168500.1	0	2344	Vu08	33961452	33963795	0	0	0	0	0
Vung79612|c0_g1_i2	Vigun09g155100	Vigun09g155100.1	(1 of 84) PF00892 - EamA-like transporter family (EamA)	2519	Vu09	32050706	32053224	PF00892	PTHR31218,PTHR31218:SF42	0	0	GO:0016021,GO:0016020,GO:0022857
Vung83669|c0_g1_i1	Vigun03g282000	Vigun03g282000.1	0	414	Vu03	46227295	46227708	0	PTHR34663,PTHR34663:SF2	0	0	0
Vung18069|c0_g2_i1	Vigun07g070200	Vigun07g070200.1	0	443	Vu07	8632631	8633073	0	0	0	0	0
Vung44891|c0_g1_i2	Vigun01g088500	Vigun01g088500.2	0	3175	Vu01	24689992	24693166	0	0	0	0	0
Vung33560|c2_g2_i9	Vigun04g148700	Vigun04g148700.1	(1 of 1) K16900 - two pore calcium channel protein, plant (TPC1, CCH1)	27993	Vu04	36416657	36444649	PF00520	PTHR10037	0	K16900	GO:0055085,GO:0016020,GO:0006811,GO:0005216
Vung115802|c1_g2_i1	Vigun09g271100	Vigun09g271100.1	(1 of 1) PTHR31929:SF2 - AUXIN-RESPONSIVE FAMILY PROTEIN-RELATED	573	Vu09	43340489	43341061	PF02519	PTHR31929,PTHR31929:SF2	0	K14488	GO:0009733
Vung5797|c0_g2_i1	Vigun07g091900	Vigun07g091900.2	0	1704	Vu07	14319556	14321259	0	PTHR38932	0	0	0
Vung147950|c0_g1_i3	Vigun05g251800	Vigun05g251800.1	(1 of 2) K11804 - WD repeat-containing protein 42A (WDR42A)	3145	Vu05	44590822	44593966	PF00400	PTHR15574	0	K11804	GO:0005515
Vung76738|c0_g1_i1	Vigun06g076800	Vigun06g076800.1	(1 of 4) K10257 - omega-3 fatty acid desaturase (delta-15 desaturase) (FAD8, desB)	2356	Vu06	20748895	20751250	PF11960,PF00487	PTHR32100,PTHR32100:SF20	0	K10257	GO:0055114,GO:0016717,GO:0006629
Vung55892|c0_g1_i12	Vigun03g184800	Vigun03g184800.1	(1 of 3) PTHR24012:SF403 - POLYADENYLATE-BINDING PROTEIN RBP47A	4745	Vu03	24223703	24228447	PF00076	PTHR24012,PTHR24012:SF403	0	0	GO:0003676
Vung9555|c0_g1_i1	Vigun03g240100	Vigun03g240100.2	(1 of 2) PTHR10177:SF206 - CYCLIN-D1-1	4157	Vu03	40024443	40028599	PF02984,PF00134	PTHR10177,PTHR10177:SF206	0	0	GO:0005634
Vung57799|c7_g1_i1	Vigun06g109700	Vigun06g109700.1	(1 of 12) 2.3.1.196 - Benzyl alcohol O-benzoyltransferase	2037	Vu06	23880716	23882752	PF02458	PTHR31642,PTHR31642:SF9	2.3.1.196	0	GO:0016747
Vung15699|c2_g1_i2	Vigun01g057800	Vigun01g057800.1	(1 of 7) 3.2.2.20 - DNA-3-methyladenine glycosylase I / DNA-3-methyladenine glycosidase I	2738	Vu01	11612514	11615251	PF03352	PTHR31116,PTHR31116:SF6	3.2.2.20	K01246	GO:0008725,GO:0006284
Vung167967|c1_g1_i14	Vigun08g030500	Vigun08g030500.4	(1 of 2) PTHR23083//PTHR23083:SF431 - TETRATRICOPEPTIDE REPEAT PROTEIN, TPR // SUBFAMILY NOT NAMED	4764	Vu08	2805420	2810183	PF07719	PTHR23083,PTHR23083:SF431	0	0	0
Vung75466|c0_g1_i1	Vigun03g189300	Vigun03g189300.1	(1 of 2) K02960 - small subunit ribosomal protein S16e (RP-S16e, RPS16)	709	Vu03	25772506	25773214	PF00380	PTHR21569,PTHR21569:SF6	0	K02960	GO:0006412,GO:0005840,GO:0003735
Vung122256|c0_g1_i1	Vigun06g225200	Vigun06g225200.1	(1 of 2) PTHR22814//PTHR22814:SF80 - COPPER TRANSPORT PROTEIN ATOX1-RELATED // SUBFAMILY NOT NAMED	1495	Vu06	33343945	33345439	PF00403	PTHR22814,PTHR22814:SF80	0	0	GO:0046872,GO:0030001
Vung47464|c4_g6_i1	Vigun07g202000	Vigun07g202000.1	(1 of 6) PTHR19139//PTHR19139:SF167 - AQUAPORIN TRANSPORTER // AQUAPORIN PIP2-1-RELATED	2874	Vu07	32333846	32336719	PF00230	PTHR19139,PTHR19139:SF167	0	K09872	GO:0016020,GO:0006810,GO:0005215
Vung18120|c2_g1_i1	Vigun10g086100	Vigun10g086100.1	(1 of 2) PTHR11431//PTHR11431:SF44 - FERRITIN // SUBFAMILY NOT NAMED	3125	Vu10	24603972	24607096	PF00210	PTHR11431,PTHR11431:SF44	1.16.3.1	K00522	GO:0008199,GO:0006879,GO:0006826
Vung110307|c0_g1_i1	Vigun02g015500	Vigun02g015500.1	(1 of 2) PTHR10106:SF15 - TRANSMEMBRANE ASCORBATE FERRIREDUCTASE 3-RELATED	1611	Vu02	5645198	5646808	PF03188	PTHR10106,PTHR10106:SF15	1.16.5.1	K08360	GO:0016021
Vung143788|c0_g1_i3	Vigun09g110600	Vigun09g110600.1	(1 of 2) PTHR17130//PTHR17130:SF25 - MITOCHONDRIAL OUTER MEMBRANE PROTEIN 25 // SUBFAMILY NOT NAMED	1558	Vu09	23910039	23911596	PF00301	PTHR17130,PTHR17130:SF25	0	0	GO:0005506
Vung160298|c0_g2_i17	Vigun10g128900	Vigun10g128900.2	(1 of 1) PTHR24414//PTHR24414:SF23 - FAMILY NOT NAMED // F-BOX/KELCH-REPEAT PROTEIN SKIP4-RELATED	3222	Vu10	33680023	33683244	PF00646,PF01344	PTHR24414,PTHR24414:SF23	0	0	GO:0005515
Vung65429|c0_g1_i1	Vigun08g121200	Vigun08g121200.2	(1 of 2) PTHR32285:SF14 - PROTEIN PMR5-RELATED	4494	Vu08	28962498	28966991	PF14416,PF13839	PTHR32285,PTHR32285:SF14	0	0	0
Vung94120|c0_g1_i1	Vigun02g161600	Vigun02g161600.1	0	375	Vu02	30715199	30715573	0	0	0	0	0
Vung127353|c2_g1_i3	Vigun06g183600	Vigun06g183600.1	(1 of 8) PTHR22835//PTHR22835:SF177 - ZINC FINGER FYVE DOMAIN CONTAINING PROTEIN // SUBFAMILY NOT NAMED	1421	Vu06	30314904	30316324	PF00657	PTHR22835,PTHR22835:SF177	3.1.1.3	0	GO:0016788
Vung16847|c1_g1_i8	Vigun06g224200	Vigun06g224200.1	(1 of 2) PTHR31235//PTHR31235:SF27 - FAMILY NOT NAMED // PEROXIDASE 62-RELATED	1880	Vu06	33279492	33281371	PF00141	PTHR31235,PTHR31235:SF27	1.11.1.7	K00430	GO:0055114,GO:0020037,GO:0006979,GO:0004601
Vung23662|c0_g1_i1	Vigun03g189300	Vigun03g189300.1	(1 of 2) K02960 - small subunit ribosomal protein S16e (RP-S16e, RPS16)	709	Vu03	25772506	25773214	PF00380	PTHR21569,PTHR21569:SF6	0	K02960	GO:0006412,GO:0005840,GO:0003735
Vung84466|c0_g1_i2	Vigun06g211800	Vigun06g211800.1	(1 of 5) 4.2.3.48 - (3S,6E)-nerolidol synthase / Nerolidol synthase	3547	Vu06	32429583	32433129	PF01397,PF03936	PTHR31225,PTHR31225:SF0	4.2.3.48	K15086	GO:0016829,GO:0010333,GO:0008152,GO:0000287
Vung159580|c0_g2_i1	Vigun09g078900	Vigun09g078900.1	(1 of 3) PTHR24093//PTHR24093:SF264 - FAMILY NOT NAMED // ATPASE 4, PLASMA MEMBRANE-TYPE	6266	Vu09	9179414	9185679	PF00690,PF00702,PF00122	PTHR24093,PTHR24093:SF264	3.6.3.6	K01535	GO:0046872,GO:0000166
Vung133660|c4_g1_i18	Vigun08g109600	Vigun08g109600.2	(1 of 1) PTHR23257//PTHR23257:SF349 - SERINE-THREONINE PROTEIN KINASE // PROTEIN KINASE FAMILY PROTEIN	16681	Vu08	27188622	27205302	PF07714,PF14381	PTHR23257,PTHR23257:SF349	2.7.11.1	0	GO:0006468,GO:0004672
Vung161326|c0_g1_i1	Vigun10g168600	Vigun10g168600.1	(1 of 3) PTHR23213//PTHR23213:SF177 - FORMIN-RELATED // FORMIN-LIKE PROTEIN 11	2904	Vu10	38760192	38763095	0	PTHR23213,PTHR23213:SF177	0	0	0
Vung32536|c0_g1_i1	Vigun08g054400	Vigun08g054400.1	(1 of 2) PTHR31731//PTHR31731:SF19 - FAMILY NOT NAMED // BIFUNCTIONAL INHIBITOR/LIPID-TRANSFER PROTEIN/SEED STORAGE 2S ALBUMIN SUPERFAMILY PROTEIN	812	Vu08	6586623	6587434	PF14547	PTHR31731,PTHR31731:SF19	0	0	0
Vung156709|c8_g1_i3	Vigun03g427900	Vigun03g427900.2	(1 of 3) PTHR12304:SF6 - INOSINE-URIDINE PREFERRING NUCLEOSIDE HYDROLASE FAMILY PROTEIN	7066	Vu03	63295668	63302733	PF01156	PTHR12304,PTHR12304:SF6	0	0	0
Vung58178|c2_g3_i1	Vigun01g201000	Vigun01g201000.1	(1 of 2) PTHR11964//PTHR11964:SF18 - S-ADENOSYLMETHIONINE SYNTHETASE // S-ADENOSYLMETHIONINE SYNTHASE 2	2456	Vu01	37740464	37742919	PF00438,PF02772,PF02773	PTHR11964,PTHR11964:SF18	2.5.1.6	K00789	GO:0006556,GO:0004478,GO:0005524
Vung71891|c0_g2_i1	Vigun07g144700	Vigun07g144700.1	(1 of 4) PTHR33136//PTHR33136:SF5 - FAMILY NOT NAMED // PROTEIN RALF-LIKE 1-RELATED	351	Vu07	25546212	25546562	PF05498	PTHR33136,PTHR33136:SF5	0	0	0
Vung74310|c2_g3_i1	Vigun08g021800	Vigun08g021800.1	(1 of 11) 3.1.1.26 - Galactolipase	2745	Vu08	1908611	1911355	PF01734	PTHR32176	3.1.1.26	0	GO:0006629
Vung46100|c1_g1_i1	Vigun05g189800	Vigun05g189800.1	0	723	Vu05	36905680	36906402	0	0	0	0	0
Vung84835|c0_g1_i1	Vigun11g092900	Vigun11g092900.1	(1 of 2) PTHR32285:SF71 - PROTEIN TRICHOME BIREFRINGENCE-LIKE 39-RELATED	3101	Vu11	27501153	27504253	PF14416,PF13839	PTHR32285,PTHR32285:SF71	0	0	0
Vung92958|c0_g1_i1	Vigun05g013300	Vigun05g013300.1	(1 of 5) PTHR19375:SF232 - MEDIATOR OF RNA POLYMERASE II TRANSCRIPTION SUBUNIT 37E-RELATED	3014	Vu05	1053294	1056307	PF00012	PTHR19375,PTHR19375:SF232	0	K03283	0
Vung103233|c0_g1_i1	Vigun03g210900	Vigun03g210900.1	(1 of 3) PTHR12565//PTHR12565:SF148 - STEROL REGULATORY ELEMENT-BINDING PROTEIN // PROTEIN BANQUO 3	1637	Vu03	34826086	34827722	PF00010	PTHR12565,PTHR12565:SF148	0	0	GO:0046983
Vung26756|c0_g2_i2	Vigun02g047200	Vigun02g047200.1	0	682	Vu02	18610181	18610862	0	0	0	0	0
Vung134383|c1_g1_i2	Vigun03g067900	Vigun03g067900.1	0	724	Vu03	5606481	5607204	0	PTHR33743	0	0	0
Vung125071|c0_g1_i11	Vigun10g187900	Vigun10g187900.1	(1 of 2) K02265 - cytochrome c oxidase subunit 5b (COX5B)	4494	Vu10	40375728	40380221	PF01215	PTHR10122,PTHR10122:SF3	1.9.3.1	K02265	GO:0005740,GO:0004129
Vung137826|c0_g1_i1	Vigun05g143200	Vigun05g143200.1	(1 of 23) PTHR33107:SF5 - KUNITZ FAMILY TRYPSIN AND PROTEASE INHIBITOR PROTEIN-RELATED	775	Vu05	18861403	18862177	PF00197	PTHR33107,PTHR33107:SF5	0	0	GO:0004866
Vung43412|c0_g1_i6	Vigun08g002700	Vigun08g002700.1	(1 of 1) PTHR13675:SF0 - LYR MOTIF-CONTAINING PROTEIN 2	2386	Vu08	283461	285846	PF05347	PTHR13675,PTHR13675:SF0	0	0	0
Vung8932|c0_g1_i10	Vigun10g195700	Vigun10g195700.1	(1 of 4) PTHR31429:SF3 - WRKY TRANSCRIPTION FACTOR 40-RELATED	2150	Vu10	40925709	40927858	PF03106	PTHR31429,PTHR31429:SF3	0	0	GO:0043565,GO:0006355,GO:0003700
Vung22789|c0_g1_i2	Vigun01g202500	Vigun01g202500.1	(1 of 1) PTHR11141//PTHR11141:SF6 - PROTEIN TRANSPORT PROTEIN SEC23 // SUBFAMILY NOT NAMED	5201	Vu01	37855192	37860392	PF04810,PF04811,PF08033,PF04815	PTHR11141,PTHR11141:SF6	0	0	GO:0030127,GO:0008270,GO:0006888,GO:0006886
Vung127961|c1_g2_i7	Vigun02g128900	Vigun02g128900.1	(1 of 4) 1.3.1.45 - 2'-hydroxyisoflavone reductase	1883	Vu02	28054265	28056147	PF05368	PTHR10366,PTHR10366:SF375	1.3.1.45	0	0
Vung66539|c0_g1_i1	Vigun07g279700	Vigun07g279700.1	0	327	Vu07	39464304	39464630	0	PTHR33148,PTHR33148:SF4	0	0	0
Vung13676|c0_g1_i1	Vigun03g067600	Vigun03g067600.4	(1 of 190) PF00847 - AP2 domain (AP2)	2022	Vu03	5586219	5588240	PF00847	PTHR31190	0	0	GO:0006355,GO:0003700
Vung131505|c2_g2_i14	Vigun05g143200	Vigun05g143200.1	(1 of 23) PTHR33107:SF5 - KUNITZ FAMILY TRYPSIN AND PROTEASE INHIBITOR PROTEIN-RELATED	775	Vu05	18861403	18862177	PF00197	PTHR33107,PTHR33107:SF5	0	0	GO:0004866
Vung159985|c0_g1_i1	Vigun11g103000	Vigun11g103000.1	(1 of 4) PTHR13935:SF53 - BASIC HELIX-LOOP-HELIX DOMAIN-CONTAINING PROTEIN	1543	Vu11	30014252	30015794	PF00010	PTHR13935,PTHR13935:SF53	0	0	GO:0046983,GO:0003677
Vung44599|c2_g1_i5	Vigun09g043600	Vigun09g043600.2	(1 of 2) PTHR33077//PTHR33077:SF5 - FAMILY NOT NAMED // PROTEIN TIFY 3A-RELATED	3835	Vu09	4087060	4090894	PF09425,PF06200	PTHR33077,PTHR33077:SF5	0	K13464	0
Vung150138|c2_g1_i4	Vigun05g253400	Vigun05g253400.1	(1 of 6) PTHR11177//PTHR11177:SF190 - CHITINASE // SUBFAMILY NOT NAMED	795	Vu05	44796877	44797671	0	PTHR11177,PTHR11177:SF190	3.2.1.14	0	0
Vung69437|c0_g1_i2	Vigun01g200900	Vigun01g200900.1	(1 of 1) PTHR14344 - WD REPEAT PROTEIN	13158	Vu01	37716741	37729898	PF00400	PTHR14344	0	0	GO:0005515
Vung20942|c0_g2_i1	Vigun07g014200	Vigun07g014200.1	(1 of 17) PF07714//PF08263 - Protein tyrosine kinase (Pkinase_Tyr) // Leucine rich repeat N-terminal domain (LRRNT_2)	3804	Vu07	1277966	1281769	PF08263,PF07714	PTHR27001,PTHR27001:SF109	2.7.11.1	0	GO:0006468,GO:0004672
Vung79247|c3_g4_i1	Vigun08g206200	Vigun08g206200.1	(1 of 3) PTHR24115:SF529 - KINESIN MOTOR FAMILY PROTEIN	6280	Vu08	36930459	36936738	PF00225,PF06548	PTHR24115,PTHR24115:SF529	3.6.4.4	K10400	GO:0008017,GO:0007018,GO:0005524,GO:0003777,GO:0005871
Vung7525|c0_g1_i2	Vigun09g097700	Vigun09g097700.2	(1 of 2) PTHR11669//PTHR11669:SF3 - REPLICATION FACTOR C / DNA POLYMERASE III GAMMA-TAU SUBUNIT // PROTEIN STICHEL-LIKE 2	5166	Vu09	15136737	15141902	PF13177	PTHR11669,PTHR11669:SF3	2.7.7.7	0	0
Vung60019|c1_g1_i16	Vigun09g079500	Vigun09g079500.1	(1 of 1) 1.1.5.2 - Quinoprotein glucose dehydrogenase (PQQ, quinone) / Quinoprotein D-glucose dehydrogenase	4095	Vu09	9364348	9368442	PF07995	PTHR19328,PTHR19328:SF34	1.1.99.35,1.1.5.2	0	GO:0048038,GO:0016901,GO:0005975
Vung155318|c0_g1_i3	Vigun05g084100	Vigun05g084100.1	0	4592	Vu05	7970497	7975088	0	PTHR31949,PTHR31949:SF2	0	0	0
Vung93109|c4_g3_i5	Vigun06g210600	Vigun06g210600.1	(1 of 2) PTHR27002//PTHR27002:SF93 - FAMILY NOT NAMED // RECEPTOR-LIKE SERINE/THREONINE-PROTEIN KINASE SD1-6-RELATED	5514	Vu06	32360559	32366072	PF11883,PF08276,PF01453,PF00954,PF07714	PTHR27002,PTHR27002:SF93	2.7.11.1	0	GO:0004674,GO:0048544,GO:0006468,GO:0004672
Vung149514|c2_g1_i5	Vigun07g007500	Vigun07g007500.1	(1 of 4) PTHR10108:SF906 - METHYLTRANSFERASE PMT1-RELATED	5752	Vu07	640967	646718	PF03141	PTHR10108,PTHR10108:SF906	2.1.1.103	0	GO:0008168
Vung3790|c2_g1_i2	Vigun05g003800	Vigun05g003800.1	(1 of 1) PTHR11654//PTHR11654:SF112 - OLIGOPEPTIDE TRANSPORTER-RELATED // PROTEIN NRT1/ PTR FAMILY 6.1	3158	Vu05	319457	322614	PF00854	PTHR11654,PTHR11654:SF112	0	0	GO:0016020,GO:0006810,GO:0005215
Vung162631|c1_g1_i2	Vigun11g154500	Vigun11g154500.1	(1 of 5) PTHR19375:SF232 - MEDIATOR OF RNA POLYMERASE II TRANSCRIPTION SUBUNIT 37E-RELATED	3122	Vu11	36358327	36361448	PF00012	PTHR19375,PTHR19375:SF232	0	K03283	0
Vung79159|c0_g1_i1	Vigun07g000900	Vigun07g000900.1	(1 of 15) PF14576//PF14577 - Sieve element occlusion N-terminus (SEO_N) // Sieve element occlusion C-terminus (SEO_C)	3598	Vu07	84187	87784	PF14577,PF14576	PTHR33232,PTHR33232:SF5	0	0	0
Vung52442|c1_g4_i1	Vigun05g223500	Vigun05g223500.1	(1 of 2) 3.1.7.11 - Geranyl diphosphate diphosphatase / Geranyl pyrophosphate pyrophosphatase	6500	Vu05	41558753	41565252	PF01397,PF03936	PTHR31225,PTHR31225:SF13	3.1.7.11	K15086	GO:0016829,GO:0010333,GO:0008152,GO:0000287
Vung74540|c1_g2_i1	Vigun07g035700	Vigun07g035700.1	(1 of 3) PTHR11728:SF17 - 6-PHOSPHOGLUCONATE DEHYDROGENASE-LIKE PROTEIN	5718	Vu07	3419925	3425642	PF01210,PF07479	PTHR11728,PTHR11728:SF17	1.1.1.8	K00006	GO:0055114,GO:0051287,GO:0046168,GO:0016616,GO:0005975,GO:0004367,GO:0009331,GO:0006072
Vung164857|c0_g2_i1	Vigun03g377600	Vigun03g377600.1	(1 of 1) PTHR14155:SF80 - RING-H2 FINGER PROTEIN ATL13-RELATED	2385	Vu03	58081597	58083981	PF13639	PTHR14155,PTHR14155:SF80	0	0	GO:0008270,GO:0005515
Vung48304|c1_g1_i3	Vigun11g108500	Vigun11g108500.1	(1 of 2) PTHR31901:SF10 - AUXIN-RESPONSIVE GH3 FAMILY PROTEIN	3599	Vu11	30848495	30852093	PF03321	PTHR31901,PTHR31901:SF10	0	K14487	0
Vung36332|c0_g1_i1	Vigun11g118100	Vigun11g118100.1	(1 of 1) PTHR11709//PTHR11709:SF106 - MULTI-COPPER OXIDASE // SUBFAMILY NOT NAMED	4642	Vu11	32411993	32416634	PF07731,PF07732,PF00394	PTHR11709,PTHR11709:SF106	1.10.3.3	0	GO:0055114,GO:0016491,GO:0005507
Vung113934|c1_g1_i3	Vigun04g173700	Vigun04g173700.2	(1 of 1) PTHR19241//PTHR19241:SF271 - ATP-BINDING CASSETTE TRANSPORTER // SUBFAMILY NOT NAMED	6111	Vu04	39783572	39789682	PF00005,PF01061	PTHR19241,PTHR19241:SF271	3.6.3.25	0	GO:0016887,GO:0005524,GO:0016020
Vung81893|c1_g1_i7	Vigun10g027200	Vigun10g027200.1	(1 of 2) PTHR31942//PTHR31942:SF13 - FAMILY NOT NAMED // MLO-LIKE PROTEIN 15	6371	Vu10	3289914	3296284	PF03094	PTHR31942,PTHR31942:SF13	0	K08472	GO:0016021,GO:0006952
Vung123972|c0_g1_i3	Vigun03g378100	Vigun03g378100.1	(1 of 1) PTHR11638//PTHR11638:SF94 - ATP-DEPENDENT CLP PROTEASE // HEAT SHOCK PROTEIN 104	5236	Vu03	58166629	58171864	PF02861	PTHR11638,PTHR11638:SF94	0	0	GO:0019538
Vung137959|c3_g3_i1	Vigun07g154600	Vigun07g154600.1	(1 of 2) PTHR24362:SF255 - SERINE/THREONINE-PROTEIN KINASE NEK1	7984	Vu07	26566839	26574822	PF00069	PTHR24362,PTHR24362:SF255	2.7.11.1	K08857	GO:0006468,GO:0005524,GO:0004672
Vung72428|c0_g1_i13	Vigun01g188400	Vigun01g188400.1	(1 of 1) K13339 - peroxin-6 (PEX6, PXAAA1)	6260	Vu01	36775921	36782180	PF05496,PF00004	PTHR23077,PTHR23077:SF9	0	K13339	GO:0009378,GO:0006310,GO:0006281,GO:0005524
Vung104759|c0_g1_i2	Vigun03g041100	Vigun03g041100.1	(1 of 2) PTHR11751//PTHR11751:SF380 - SUBGROUP I AMINOTRANSFERASE RELATED // 1-AMINOCYCLOPROPANE-1-CARBOXYLATE SYNTHASE 2-RELATED	2725	Vu03	3230881	3233605	PF00155	PTHR11751,PTHR11751:SF380	4.4.1.14	K01762	GO:0030170,GO:0009058
Vung34198|c0_g1_i1	Vigun09g010000	Vigun09g010000.1	(1 of 50) PF00407 - Pathogenesis-related protein Bet v I family (Bet_v_1)	2363	Vu09	750199	752561	PF00407	PTHR31213,PTHR31213:SF17	0	0	GO:0009607,GO:0006952
Vung118472|c0_g2_i1	Vigun05g202100	Vigun05g202100.1	(1 of 2) K08202 - MFS transporter, OCT family, solute carrier family 22 (organic cation transporter), member 4/5 (SLC22A4_5, OCTN)	4352	Vu05	39018576	39022927	PF07690	PTHR24064,PTHR24064:SF292	0	K08202	GO:0055085,GO:0016021
Vung67583|c3_g2_i4	Vigun02g133900	Vigun02g133900.1	(1 of 2) PTHR12320:SF16 - PROTEIN PHOSPHATASE 2C 80-RELATED	3755	Vu02	28426542	28430296	PF07228	PTHR12320,PTHR12320:SF16	3.1.3.16	0	GO:0003824
Vung9048|c0_g1_i1	Vigun01g236200	Vigun01g236200.1	0	1990	Vu01	40762032	40764021	0	PTHR35310	0	0	0
Vung19348|c1_g3_i2	Vigun05g084900	Vigun05g084900.1	(1 of 2) PTHR31451:SF17 - MANNAN ENDO-1,4-BETA-MANNOSIDASE 6	3117	Vu05	8047970	8051086	PF00150	PTHR31451,PTHR31451:SF17	3.2.1.78	K19355	GO:0005975,GO:0004553
Vung107603|c0_g1_i1	Vigun03g043500	Vigun03g043500.1	(1 of 1) PTHR24296//PTHR24296:SF35 - FAMILY NOT NAMED // CYTOCHROME P450 86A7	2184	Vu03	3488945	3491128	PF00067	PTHR24296,PTHR24296:SF35	1.14.14.1	K15398	GO:0055114,GO:0020037,GO:0016705,GO:0005506
Vung99843|c0_g1_i3	Vigun03g277600	Vigun03g277600.1	(1 of 19) PF03763 - Remorin, C-terminal region (Remorin_C)	3093	Vu03	45471543	45474635	PF03763	PTHR31471,PTHR31471:SF2	0	0	0
Vung109679|c0_g1_i4	Vigun03g238300	Vigun03g238300.3	(1 of 2) K12391 - AP-1 complex subunit gamma-1 (AP1G1)	43486	Vu03	39744028	39787513	PF02883,PF01602	PTHR22780,PTHR22780:SF27	0	K12391	GO:0030131,GO:0016192,GO:0006886,GO:0030117
Vung163638|c0_g1_i1	Vigun09g035000	Vigun09g035000.1	(1 of 6) 3.4.24.12 - Envelysin / Sea-urchin-hatching proteinase	2002	Vu09	3077525	3079526	PF01471,PF00413	PTHR10201,PTHR10201:SF140	3.4.24.12	0	GO:0031012,GO:0008270,GO:0006508,GO:0004222
Vung10857|c2_g1_i9	Vigun03g445600	Vigun03g445600.1	(1 of 2) 1.8.4.10 - Adenylyl-sulfate reductase (thioredoxin) / Thioredoxin-dependent 5'-adenylylsulfate reductase	2199	Vu03	64734378	64736576	PF00085,PF01507	PTHR23293,PTHR23293:SF11	1.8.4.10	K05907	GO:0045454,GO:0008152,GO:0003824
Vung113674|c0_g2_i10	Vigun09g240900	Vigun09g240900.1	(1 of 1) K16572 - gamma-tubulin complex component 5 (TUBGCP5, GCP5)	9970	Vu09	41072494	41082463	PF04130	PTHR19302,PTHR19302:SF33	0	K16572	GO:0005815,GO:0000922,GO:0000226
Vung31870|c0_g1_i1	Vigun05g148900	Vigun05g148900.1	(1 of 12) K08237 - hydroquinone glucosyltransferase [EC:2.4.1.218] Glc b1- hydroquinone (E2.4.1.218)	1818	Vu05	21485996	21487813	PF00201	PTHR11926,PTHR11926:SF381	2.4.1.218	K08237	GO:0016758,GO:0008152
Vung23326|c0_g1_i1	Vigun05g254400	Vigun05g254400.1	(1 of 2) PTHR12542//PTHR12542:SF17 - EXOCYST COMPLEX PROTEIN EXO70 // SUBFAMILY NOT NAMED	1794	Vu05	44902071	44903864	PF03081	PTHR12542,PTHR12542:SF17	0	K07195	GO:0006887,GO:0000145
Vung47437|c0_g1_i1	Vigun02g119300	Vigun02g119300.1	(1 of 2) PTHR31235//PTHR31235:SF67 - FAMILY NOT NAMED // PEROXIDASE 64	3664	Vu02	27200344	27204007	PF00141	PTHR31235,PTHR31235:SF67	1.11.1.7	K00430	GO:0055114,GO:0020037,GO:0006979,GO:0004601
Vung36447|c0_g2_i1	Vigun01g231400	Vigun01g231400.1	(1 of 2) PTHR11709:SF22 - LACCASE-12-RELATED	3148	Vu01	40376765	40379912	PF07731,PF00394,PF07732	PTHR11709,PTHR11709:SF22	1.10.3.2	K05909	GO:0055114,GO:0016491,GO:0005507
Vung146538|c4_g1_i21	Vigun05g185300	Vigun05g185300.2	(1 of 1) K03539 - ribonuclease P/MRP protein subunit RPP1 (RPP1, RPP30)	5342	Vu05	35732706	35738047	PF01876	PTHR13031	3.1.26.5	0	GO:0008033,GO:0004540
Vung146538|c4_g1_i22	Vigun05g185300	Vigun05g185300.2	(1 of 1) K03539 - ribonuclease P/MRP protein subunit RPP1 (RPP1, RPP30)	5342	Vu05	35732706	35738047	PF01876	PTHR13031	3.1.26.5	0	GO:0008033,GO:0004540
Vung50189|c2_g2_i12	Vigun06g076000	Vigun06g076000.1	(1 of 6) K07300 - Ca2+:H+ antiporter (chaA, CAX)	3373	Vu06	20640702	20644074	PF01699	PTHR31503,PTHR31503:SF9	0	K07300	GO:0055085,GO:0016021
Vung76201|c8_g1_i1	Vigun02g073800	Vigun02g073800.1	(1 of 6) PTHR32285//PTHR32285:SF57 - FAMILY NOT NAMED // PROTEIN ALTERED XYLOGLUCAN 4	2696	Vu02	22553905	22556600	PF14416,PF13839	PTHR32285,PTHR32285:SF57	0	0	0
Vung122612|c1_g1_i4	Vigun05g235800	Vigun05g235800.1	(1 of 3) PTHR32227:SF70 - GLUCAN ENDO-1,3-BETA-GLUCOSIDASE 14	3458	Vu05	42892999	42896456	PF00332	PTHR32227,PTHR32227:SF70	3.2.1.39	0	GO:0005975,GO:0004553
Vung43217|c0_g1_i1	Vigun11g129000	Vigun11g129000.1	(1 of 1) PTHR24296//PTHR24296:SF7 - FAMILY NOT NAMED // CYTOCHROME P450 94C1	1657	Vu11	33652284	33653940	PF00067	PTHR24296,PTHR24296:SF7	0	0	GO:0055114,GO:0020037,GO:0016705,GO:0005506
Vung157896|c0_g1_i2	Vigun01g218400	Vigun01g218400.1	(1 of 1) PTHR36029:SF1 - PROTEIN TPLATE	9414	Vu01	39221311	39230724	0	PTHR36029,PTHR36029:SF1	0	0	0
Vung57978|c0_g1_i2	Vigun09g075300	Vigun09g075300.1	(1 of 40) PF01357//PF03330 - Pollen allergen (Pollen_allerg_1) // Rare lipoprotein A (RlpA)-like double-psi beta-barrel (DPBB_1)	2858	Vu09	8521364	8524221	PF03330,PF01357	PTHR31867	0	0	0
Vung58931|c1_g1_i5	Vigun09g026200	Vigun09g026200.1	(1 of 14) K01535 - H+-transporting ATPase (E3.6.3.6)	7707	Vu09	2052870	2060576	PF00690,PF00702,PF00122	PTHR24093,PTHR24093:SF361	3.6.3.6	K01535	GO:0046872,GO:0000166
Vung155239|c2_g1_i2	Vigun05g042200	Vigun05g042200.1	(1 of 10) K15015 - solute carrier family 32 (vesicular inhibitory amino acid transporter) (SLC32A, VGAT)	2034	Vu05	3402319	3404352	PF01490	PTHR22950,PTHR22950:SF280	0	K15015	0
Vung138657|c2_g1_i17	Vigun04g126600	Vigun04g126600.1	(1 of 3) 4.4.1.4 - Alliin lyase / L-cysteine sulfoxide lyase	3814	Vu04	31951264	31955077	PF04863,PF04864	PTHR11751,PTHR11751:SF126	4.4.1.4	0	GO:0016846
Vung28583|c0_g1_i1	Vigun01g061700	Vigun01g061700.1	(1 of 1) PTHR24351//PTHR24351:SF82 - RIBOSOMAL PROTEIN S6 KINASE // SERINE/THREONINE-PROTEIN KINASE WAG1	1779	Vu01	13169381	13171159	PF07714,PF00069	PTHR24351,PTHR24351:SF82	2.7.11.1	0	GO:0006468,GO:0004672,GO:0005524
Vung113934|c1_g1_i4	Vigun04g173700	Vigun04g173700.1	(1 of 1) PTHR19241//PTHR19241:SF271 - ATP-BINDING CASSETTE TRANSPORTER // SUBFAMILY NOT NAMED	6111	Vu04	39783572	39789682	PF00005,PF01061	PTHR19241,PTHR19241:SF271	3.6.3.25	0	GO:0016887,GO:0005524,GO:0016020
Vung18800|c1_g1_i5	Vigun02g033100	Vigun02g033100.1	(1 of 2) PTHR11614//PTHR11614:SF94 - PHOSPHOLIPASE-RELATED // ALPHA/BETA-HYDROLASE-LIKE PROTEIN	12063	Vu02	13932360	13944422	PF12695	PTHR11614,PTHR11614:SF94	2.3.1.22	0	0
Vung107855|c0_g1_i1	Vigun01g164000	Vigun01g164000.1	(1 of 3) PTHR19139:SF52 - AQUAPORIN TIP1-1	1616	Vu01	34562779	34564394	PF00230	PTHR19139,PTHR19139:SF52	0	K09873	GO:0016020,GO:0006810,GO:0005215
Vung81862|c4_g2_i2	Vigun06g063600	Vigun06g063600.1	(1 of 2) PTHR32382//PTHR32382:SF4 - FAMILY NOT NAMED // FASCICLIN-LIKE ARABINOGALACTAN PROTEIN 1	1747	Vu06	19228345	19230091	PF02469	PTHR32382,PTHR32382:SF4	0	0	0
Vung94119|c2_g1_i3	Vigun09g025000	Vigun09g025000.1	(1 of 1298) 2.7.11.1 - Non-specific serine/threonine protein kinase / Threonine-specific protein kinase	2035	Vu09	1965320	1967354	PF07714	PTHR27009,PTHR27009:SF17	2.7.11.1	0	GO:0006468,GO:0004672
Vung151395|c0_g1_i2	Vigun05g117300	Vigun05g117300.1	(1 of 1) PTHR11709:SF62 - LACCASE-2	2997	Vu05	12556920	12559916	PF07731,PF07732,PF00394	PTHR11709,PTHR11709:SF62	1.10.3.2	K05909	GO:0055114,GO:0016491,GO:0005507
Vung104285|c0_g1_i5	Vigun03g159700	Vigun03g159700.2	(1 of 21) K04730 - interleukin-1 receptor-associated kinase 1 (IRAK1)	4829	Vu03	17606506	17611334	PF07714	PTHR27002,PTHR27002:SF4	2.7.11.1	0	GO:0006468,GO:0004672
Vung161037|c0_g1_i1	Vigun08g018000	Vigun08g018000.1	(1 of 5) KOG2966 - Uncharacterized conserved protein	2977	Vu08	1524047	1527023	PF04678	PTHR13462,PTHR13462:SF17	0	0	0
Vung50482|c0_g1_i2	Vigun01g036900	Vigun01g036900.1	(1 of 3) PTHR11728:SF17 - 6-PHOSPHOGLUCONATE DEHYDROGENASE-LIKE PROTEIN	6609	Vu01	4863672	4870280	PF01210,PF07479	PTHR11728,PTHR11728:SF17	1.1.1.8	K00006	GO:0055114,GO:0051287,GO:0046168,GO:0016616,GO:0005975,GO:0004367,GO:0009331,GO:0006072
Vung38337|c0_g1_i1	Vigun08g092000	Vigun08g092000.1	(1 of 1) PTHR10209:SF165 - FLAVONOL SYNTHASE 3-RELATED	2778	Vu08	21478370	21481147	PF14226,PF03171	PTHR10209,PTHR10209:SF165	1.14.11.23	K05278	GO:0055114,GO:0016491
Vung104127|c1_g2_i1	Vigun11g086900	Vigun11g086900.1	(1 of 100) 1.11.1.7 - Peroxidase / Lactoperoxidase	2358	Vu11	25946397	25948754	PF00141	PTHR31388	1.11.1.7	K00430	GO:0055114,GO:0020037,GO:0006979,GO:0004601
Vung1089|c0_g1_i1	Vigun01g101800	Vigun01g101800.1	(1 of 37) PF05678 - VQ motif (VQ)	2564	Vu01	26947853	26950416	PF05678	PTHR33179,PTHR33179:SF9	0	0	0
Vung41621|c0_g1_i2	Vigun08g105000	Vigun08g105000.1	(1 of 4) PTHR10209//PTHR10209:SF167 - OXIDOREDUCTASE, 2OG-FE II OXYGENASE FAMILY PROTEIN // SUBFAMILY NOT NAMED	5167	Vu08	26122904	26128070	PF14226,PF03171	PTHR10209,PTHR10209:SF167	1.14.11.9	0	GO:0055114,GO:0016491
Vung160396|c0_g1_i1	Vigun03g011700	Vigun03g011700.1	(1 of 2) K02981 - small subunit ribosomal protein S2e (RP-S2e, RPS2)	2301	Vu03	786481	788781	PF03719,PF00333	PTHR13718,PTHR13718:SF69	0	K02981	GO:0006412,GO:0005840,GO:0003735,GO:0003723
Vung116500|c0_g1_i3	Vigun06g103200	Vigun06g103200.2	(1 of 5) PTHR24322//PTHR24322:SF566 - FAMILY NOT NAMED // GLUCOSE AND RIBITOL DEHYDROGENASE HOMOLOG 1-RELATED	2112	Vu06	23297294	23299405	PF08659	PTHR24322,PTHR24322:SF566	0	0	0
Vung129192|c0_g1_i3	Vigun02g046100	Vigun02g046100.1	(1 of 1) PTHR31009//PTHR31009:SF9 - S-ADENOSYL-L-METHIONINE:CARBOXYL METHYLTRANSFERASE FAMILY PROTEIN // SUBFAMILY NOT NAMED	3135	Vu02	18384215	18387349	PF03492	PTHR31009,PTHR31009:SF9	2.1.1.159	0	GO:0008168
Vung121900|c1_g1_i3	Vigun11g105600	Vigun11g105600.1	(1 of 2) PTHR31692//PTHR31692:SF5 - FAMILY NOT NAMED // EXPANSIN-B1-RELATED	3330	Vu11	30407268	30410597	PF03330,PF01357	PTHR31692,PTHR31692:SF5	0	0	0
Vung28644|c0_g1_i1	Vigun11g167500	Vigun11g167500.1	(1 of 7) PF06075 - Plant protein of unknown function (DUF936) (DUF936)	5320	Vu11	37445419	37450738	PF06075	PTHR31928,PTHR31928:SF4	0	0	0
Vung124870|c1_g1_i7	Vigun04g044600	Vigun04g044600.1	(1 of 1) PTHR13872:SF23 - DOLICHYL-DIPHOSPHOOLIGOSACCHARIDE--PROTEIN GLYCOSYLTRANSFERASE SUBUNIT STT3B	5800	Vu04	3847242	3853041	PF02516	PTHR13872,PTHR13872:SF23	2.4.99.18	K07151	GO:0016020,GO:0006486,GO:0004576
Vung15734|c1_g1_i2	Vigun05g016000	Vigun05g016000.1	(1 of 2) PTHR10159//PTHR10159:SF339 - DUAL SPECIFICITY PROTEIN PHOSPHATASE // PROTEIN-TYROSINE-PHOSPHATASE MKP1	4616	Vu05	1273665	1278280	PF00782	PTHR10159,PTHR10159:SF339	3.1.3.48	0	GO:0008138,GO:0006470
Vung83505|c0_g2_i1	Vigun02g036300	Vigun02g036300.1	(1 of 2) PTHR13683:SF274 - ASPARTYL PROTEASE FAMILY PROTEIN	3341	Vu02	14994565	14997905	PF00026	PTHR13683,PTHR13683:SF274	3.4.23.12	0	GO:0006508,GO:0004190
Vung72655|c0_g5_i18	Vigun09g253900	Vigun09g253900.1	(1 of 16) PF05003//PF11961 - Protein of unknown function (DUF668) (DUF668) // Domain of unknown function (DUF3475) (DUF3475)	5009	Vu09	42055949	42060957	PF11961,PF05003	PTHR31730,PTHR31730:SF5	0	0	0
Vung122878|c5_g1_i3	Vigun10g023600	Vigun10g023600.1	(1 of 7) PTHR11926//PTHR11926:SF360 - GLUCOSYL/GLUCURONOSYL TRANSFERASES // UDP-GLYCOSYLTRANSFERASE 91A1-RELATED	1320	Vu10	2796601	2797920	PF00201	PTHR11926,PTHR11926:SF360	2.4.1.273	0	GO:0016758,GO:0008152
Vung95601|c1_g2_i2	Vigun03g207000	Vigun03g207000.1	(1 of 40) PF01357//PF03330 - Pollen allergen (Pollen_allerg_1) // Rare lipoprotein A (RlpA)-like double-psi beta-barrel (DPBB_1)	1898	Vu03	33732626	33734523	PF03330,PF01357	PTHR31867	0	0	0
Vung167643|c0_g1_i3	Vigun10g161900	Vigun10g161900.1	(1 of 9) K13464 - jasmonate ZIM domain-containing protein (JAZ)	2449	Vu10	38075598	38078046	PF09425,PF06200	PTHR33077	0	K13464	0
Vung75499|c0_g1_i2	Vigun05g179300	Vigun05g179300.1	(1 of 2) PTHR32285//PTHR32285:SF30 - FAMILY NOT NAMED // PROTEIN TRICHOME BIREFRINGENCE-LIKE 42	2074	Vu05	33891592	33893665	PF14416,PF13839	PTHR32285,PTHR32285:SF30	0	0	0
Vung10925|c0_g1_i3	Vigun02g150400	Vigun02g150400.1	(1 of 2) PTHR31517//PTHR31517:SF3 - FAMILY NOT NAMED // PEROXIDASE 35-RELATED	1713	Vu02	29728929	29730641	PF00141	PTHR31517,PTHR31517:SF3	1.11.1.7	K00430	GO:0055114,GO:0020037,GO:0006979,GO:0004601
Vung87823|c0_g1_i2	Vigun07g169400	Vigun07g169400.1	(1 of 16) PTHR23050 - CALCIUM BINDING PROTEIN	2243	Vu07	28344122	28346364	PF13499	PTHR23050	0	K13448	0
Vung57179|c1_g2_i1	Vigun03g283200	Vigun03g283200.1	(1 of 10) K14487 - auxin responsive GH3 gene family (GH3)	2494	Vu03	46370719	46373212	PF03321	PTHR31901,PTHR31901:SF7	0	K14487	0
Vung24530|c0_g1_i1	Vigun09g187700	Vigun09g187700.1	(1 of 1) PTHR22952//PTHR22952:SF199 - CAMP-RESPONSE ELEMENT BINDING PROTEIN-RELATED // SUBFAMILY NOT NAMED	1885	Vu09	36155323	36157207	PF14144	PTHR22952,PTHR22952:SF199	0	0	GO:0043565,GO:0006351
Vung146467|c0_g3_i3	Vigun01g205800	Vigun01g205800.1	(1 of 5) PTHR21562:SF5 - PECTINACETYLESTERASE FAMILY PROTEIN	4049	Vu01	38156910	38160958	PF03283	PTHR21562,PTHR21562:SF5	0	0	GO:0016787
Vung144283|c0_g2_i1	Vigun03g288100	Vigun03g288100.1	(1 of 1) PTHR10177//PTHR10177:SF227 - CYCLINE // SUBFAMILY NOT NAMED	1832	Vu03	47024874	47026705	PF02984,PF00134	PTHR10177,PTHR10177:SF227	0	K18810	GO:0005634
Vung11999|c0_g1_i2	Vigun07g225900	Vigun07g225900.1	(1 of 2) PTHR11588//PTHR11588:SF114 - TUBULIN // SUBFAMILY NOT NAMED	2274	Vu07	34808951	34811224	PF03953,PF00091	PTHR11588,PTHR11588:SF114	2.4.2.1	K07375	GO:0003924,GO:0007017,GO:0005874
Vung103875|c3_g3_i4	Vigun01g012000	Vigun01g012000.2	(1 of 2) K14191 - 18S rRNA (adenine1779-N6/adenine1780-N6)-dimethyltransferase [EC:2.1.1.183] (DIM1)	2466	Vu01	1322671	1325136	PF12847	PTHR11727	2.1.1.183	K14191	0
Vung135381|c3_g1_i1	Vigun08g128200	Vigun08g128200.1	(1 of 18) K09285 - AP2-like factor, ANT lineage (OVM, ANT)	3182	Vu08	29844382	29847563	PF00847	PTHR32467,PTHR32467:SF17	0	K09285	GO:0006355,GO:0003700,GO:0007275
Vung54355|c1_g2_i1	Vigun05g282700	Vigun05g282700.1	(1 of 2) PTHR19139//PTHR19139:SF99 - AQUAPORIN TRANSPORTER // AQUAPORIN TIP2-1	1730	Vu05	47141606	47143335	PF00230	PTHR19139,PTHR19139:SF99	0	K09873	GO:0016020,GO:0006810,GO:0005215
Vung150138|c2_g1_i6	Vigun05g253500	Vigun05g253500.1	(1 of 6) PTHR11177//PTHR11177:SF190 - CHITINASE // SUBFAMILY NOT NAMED	1196	Vu05	44812919	44814114	PF00704	PTHR11177,PTHR11177:SF190	3.2.1.14	0	GO:0005975,GO:0004553
Vung62452|c1_g3_i1	Vigun04g015100	Vigun04g015100.1	(1 of 42) PF00083 - Sugar (and other) transporter (Sugar_tr)	2806	Vu04	1098171	1100976	PF00083	PTHR23500,PTHR23500:SF170	0	0	GO:0055085,GO:0022857,GO:0016021
Vung63548|c0_g1_i2	Vigun06g095900	Vigun06g095900.1	(1 of 8) 6.2.1.12 - 4-coumarate--CoA ligase / 4-coumaryl-CoA synthetase	3152	Vu06	22703255	22706406	PF13193,PF00501	PTHR24095,PTHR24095:SF189	6.2.1.12	0	GO:0008152,GO:0003824
Vung159203|c0_g1_i1	Vigun10g157000	Vigun10g157000.1	(1 of 2) PTHR31707//PTHR31707:SF55 - FAMILY NOT NAMED // PECTINESTERASE 2-RELATED	5185	Vu10	37648871	37654055	PF04043,PF01095	PTHR31707,PTHR31707:SF55	3.1.1.11	K01051	GO:0004857,GO:0042545,GO:0030599,GO:0005618
Vung124787|c0_g2_i1	Vigun09g067800	Vigun09g067800.1	(1 of 2) PTHR31807//PTHR31807:SF2 - FAMILY NOT NAMED // HAUS AUGMIN-LIKE COMPLEX SUBUNIT 8	4434	Vu09	7229690	7234123	PF04484	PTHR31807,PTHR31807:SF2	0	0	0
Vung126656|c1_g3_i3	Vigun02g132000	Vigun02g132000.1	(1 of 2) K09587 - steroid 22-alpha-hydroxylase (CYP90B1, DWF4)	4185	Vu02	28285245	28289429	PF00067	PTHR24286,PTHR24286:SF37	0	K09587	GO:0055114,GO:0020037,GO:0016705,GO:0005506
Vung143131|c4_g1_i3	Vigun10g181500	Vigun10g181500.1	(1 of 2) PTHR19139//PTHR19139:SF99 - AQUAPORIN TRANSPORTER // AQUAPORIN TIP2-1	1791	Vu10	39908651	39910441	PF00230	PTHR19139,PTHR19139:SF99	0	K09873	GO:0016020,GO:0006810,GO:0005215
Vung100357|c0_g2_i6	Vigun03g331900	Vigun03g331900.1	(1 of 2) PTHR24349:SF167 - CALCIUM-DEPENDENT PROTEIN KINASE 10-RELATED	3332	Vu03	52962380	52965711	PF13499,PF07714	PTHR24349,PTHR24349:SF167	2.7.11.1	K13412	GO:0006468,GO:0004672
Vung133633|c0_g1_i1	Vigun06g137500	Vigun06g137500.1	(1 of 6) PTHR32448:SF34 - F22M8.11 PROTEIN-RELATED	1795	Vu06	26300245	26302039	PF08031,PF01565	PTHR32448,PTHR32448:SF34	1.3.3.8	0	GO:0055114,GO:0050660,GO:0016491
Vung146691|c0_g1_i1	Vigun03g024100	Vigun03g024100.1	(1 of 37) K09286 - EREBP-like factor (EREBP)	1281	Vu03	1783605	1784885	PF00847	PTHR31985,PTHR31985:SF16	0	K09286	GO:0006355,GO:0003700
Vung67283|c0_g1_i12	Vigun01g210900	Vigun01g210900.1	(1 of 12) PF07887 - Calmodulin binding protein-like (Calmodulin_bind)	1376	Vu01	38539315	38540690	PF07887	PTHR31713,PTHR31713:SF14	0	0	GO:0006950,GO:0005516
Vung165609|c0_g1_i1	Vigun05g014000	Vigun05g014000.1	(1 of 2) PTHR10795//PTHR10795:SF387 - PROPROTEIN CONVERTASE SUBTILISIN/KEXIN // SUBTILISIN-LIKE SERINE PROTEASE-RELATED	3002	Vu05	1105619	1108620	PF05922,PF02225,PF00082	PTHR10795,PTHR10795:SF387	3.4.21.25	0	GO:0006508,GO:0004252
Vung122025|c0_g1_i2	Vigun11g141100	Vigun11g141100.1	(1 of 3) PTHR31223//PTHR31223:SF17 - FAMILY NOT NAMED // CYTOKININ RIBOSIDE 5'-MONOPHOSPHATE PHOSPHORIBOHYDROLASE LOG3-RELATED	4142	Vu11	35060558	35064699	PF03641	PTHR31223,PTHR31223:SF17	0	K06966	0
Vung138864|c0_g1_i1	Vigun02g071000	Vigun02g071000.1	(1 of 3) 3.4.24.23 - Matrilysin / Uterine metalloendopeptidase	1077	Vu02	22179005	22180081	PF01471,PF00413	PTHR10201,PTHR10201:SF140	3.4.24.23	0	GO:0031012,GO:0008270,GO:0006508,GO:0004222
Vung104403|c0_g1_i8	Vigun06g089200	Vigun06g089200.1	(1 of 2) 3.6.4.8 - Proteasome ATPase / RP triple-A protein	4902	Vu06	22134647	22139548	PF07728	PTHR23073,PTHR23073:SF8	3.6.4.8	K03063	GO:0016887,GO:0005524
Vung156641|c2_g1_i5	Vigun05g043300	Vigun05g043300.1	(1 of 3) PTHR10168//PTHR10168:SF110 - GLUTAREDOXIN // SUBFAMILY NOT NAMED	2325	Vu05	3587028	3589352	PF00462	PTHR10168,PTHR10168:SF110	0	0	GO:0045454,GO:0015035,GO:0009055
Vung43970|c0_g1_i1	Vigun11g113000	Vigun11g113000.1	(1 of 10) K14487 - auxin responsive GH3 gene family (GH3)	3176	Vu11	31568660	31571835	PF03321	PTHR31901,PTHR31901:SF17	0	K14487	0
Vung37482|c0_g1_i1	Vigun03g290800	Vigun03g290800.1	0	3441	Vu03	47400256	47403696	0	PTHR33700,PTHR33700:SF1	0	0	0
Vung35551|c2_g2_i2	Vigun05g125800	Vigun05g125800.1	(1 of 2) PTHR31683:SF20 - PECTATE LYASE 1-RELATED	6136	Vu05	14141535	14147670	PF00544	PTHR31683,PTHR31683:SF20	4.2.2.2	K01728	0
Vung101179|c0_g1_i7	Vigun11g173700	Vigun11g173700.1	(1 of 5) PTHR23500//PTHR23500:SF109 - FAMILY NOT NAMED // POLYOL TRANSPORTER 5	2359	Vu11	37891941	37894299	PF07690	PTHR23500,PTHR23500:SF109	0	0	GO:0055085,GO:0016021
Vung116400|c2_g1_i2	Vigun07g275600	Vigun07g275600.1	(1 of 2) PTHR32285:SF52 - PROTEIN TRICHOME BIREFRINGENCE-LIKE 36	2961	Vu07	39095857	39098817	PF14416,PF13839	PTHR32285,PTHR32285:SF52	0	0	0
Vung118341|c0_g2_i3	Vigun03g267600	Vigun03g267600.1	(1 of 2) PTHR14255//PTHR14255:SF11 - ATP-DEPENDENT PROTEASE CEREBLON // SUBFAMILY NOT NAMED	3620	Vu03	43854122	43857741	PF01925	PTHR14255,PTHR14255:SF11	0	0	GO:0016021
Vung101257|c0_g2_i1	Vigun09g154400	Vigun09g154400.1	(1 of 9) PTHR31992:SF8 - DOF ZINC FINGER PROTEIN DOF1.1-RELATED	1830	Vu09	31986621	31988450	PF02701	PTHR31992,PTHR31992:SF8	0	0	GO:0006355,GO:0003677
Vung116505|c0_g1_i1	Vigun05g005100	Vigun05g005100.1	(1 of 1) PTHR23024//PTHR23024:SF93 - MEMBER OF 'GDXG' FAMILY OF LIPOLYTIC ENZYMES // CARBOXYLESTERASE 17-RELATED	1023	Vu05	420319	421341	PF00135	PTHR23024,PTHR23024:SF93	3.1.1.1	0	0
Vung104630|c0_g1_i1	Vigun01g170100	Vigun01g170100.1	(1 of 1) PF00024//PF00954//PF01453 - PAN domain (PAN_1) // S-locus glycoprotein domain (S_locus_glycop) // D-mannose binding lectin (B_lectin)	2195	Vu01	35205436	35207630	PF00024,PF00954,PF01453	PTHR11795,PTHR11795:SF386	0	0	GO:0048544
Vung39360|c0_g1_i1	Vigun03g277400	Vigun03g277400.1	0	1012	Vu03	45449328	45450339	0	PTHR32011	0	0	0
Vung56786|c0_g1_i1	Vigun07g048400	Vigun07g048400.1	(1 of 56) PF00139 - Legume lectin domain (Lectin_legB)	1153	Vu07	5000856	5002008	PF00139	PTHR32401,PTHR32401:SF5	0	0	GO:0030246
Vung21573|c1_g1_i1	Vigun01g021900	Vigun01g021900.2	(1 of 3) PTHR24089//PTHR24089:SF316 - FAMILY NOT NAMED // ADP,ATP CARRIER PROTEIN 1, MITOCHONDRIAL	3508	Vu01	2321320	2324827	PF00153	PTHR24089,PTHR24089:SF316	0	K05863	0
Vung95086|c0_g2_i1	Vigun01g247900	Vigun01g247900.1	(1 of 2) PTHR33044:SF7 - NON-SPECIFIC LIPID TRANSFER PROTEIN GPI-ANCHORED 1	1993	Vu01	41546364	41548356	PF14368	PTHR33044,PTHR33044:SF7	0	0	0
Vung89724|c1_g3_i7	Vigun08g220000	Vigun08g220000.1	(1 of 2) K00626 - acetyl-CoA C-acetyltransferase (E2.3.1.9, atoB)	4493	Vu08	37893277	37897769	PF02803,PF00108	PTHR18919,PTHR18919:SF105	2.3.1.9	K00626	GO:0016747,GO:0008152
Vung110583|c1_g1_i4	Vigun09g228300	Vigun09g228300.2	0	3332	Vu09	40043445	40046776	0	PTHR34208,PTHR34208:SF1	0	0	0
Vung112070|c1_g1_i1	Vigun11g074800	Vigun11g074800.1	(1 of 3) PTHR23213//PTHR23213:SF195 - FORMIN-RELATED // FORMIN-LIKE PROTEIN 12-RELATED	7552	Vu11	21838226	21845777	PF02181	PTHR23213,PTHR23213:SF195	0	0	0
Vung48478|c0_g1_i1	Vigun05g116200	Vigun05g116200.1	(1 of 1) PTHR27007//PTHR27007:SF13 - FAMILY NOT NAMED // L-TYPE LECTIN-DOMAIN CONTAINING RECEPTOR KINASE IV.1-RELATED	2662	Vu05	12383277	12385938	PF00069,PF00139	PTHR27007,PTHR27007:SF13	2.7.11.1	0	GO:0006468,GO:0005524,GO:0004672,GO:0030246
Vung72490|c0_g1_i1	Vigun11g128300	Vigun11g128300.1	(1 of 3) 1.2.1.42//1.2.1.50//1.2.1.84 - Hexadecanal dehydrogenase (acylating) / Fatty acyl-CoA reductase // Long-chain-fatty-acyl-CoA reductase / Acyl-CoA reductase // Alcohol-forming fatty acyl-CoA reductase	5522	Vu11	33590901	33596422	PF16363,PF03015	PTHR11011,PTHR11011:SF40	1.2.1.50,1.2.1.42,1.2.1.84	K13356	GO:0080019
Vung123574|c0_g1_i17	Vigun02g080100	Vigun02g080100.1	(1 of 1) 3.1.1.3//3.1.1.32 - Triacylglycerol lipase / Triglyceride lipase // Phospholipase A(1) / Phospholipase A1	3414	Vu02	23286810	23290223	0	PTHR34043,PTHR34043:SF1	3.1.1.32,3.1.1.3	0	0
Vung27087|c0_g1_i1	Vigun01g213500	Vigun01g213500.1	(1 of 2) PTHR22849//PTHR22849:SF43 - WDSAM1 PROTEIN // U-BOX DOMAIN-CONTAINING PROTEIN 54-RELATED	1808	Vu01	38752142	38753949	PF04564	PTHR22849,PTHR22849:SF43	6.3.2.19	0	GO:0016567,GO:0004842
Vung30386|c0_g2_i1	Vigun03g190500	Vigun03g190500.1	(1 of 9) PF04669 - Polysaccharide biosynthesis (Polysacc_synt_4)	1812	Vu03	26122939	26124750	PF04669	PTHR31444,PTHR31444:SF0	0	0	0
Vung768|c0_g1_i2	Vigun02g197900	Vigun02g197900.1	(1 of 5) K01696 - tryptophan synthase beta chain (trpB)	2200	Vu02	33302579	33304778	PF00291	PTHR10314,PTHR10314:SF123	4.2.1.20	K01696	0
Vung15809|c3_g1_i10	Vigun03g255300	Vigun03g255300.1	(1 of 2) PTHR22792:SF59 - LA-RELATED PROTEIN 1B-RELATED	4240	Vu03	42172328	42176567	PF05383	PTHR22792,PTHR22792:SF59	0	K18757	0
Vung130065|c3_g1_i7	Vigun04g149000	Vigun04g149000.1	(1 of 2) 2.3.2.5 - Glutaminyl-peptide cyclotransferase / Glutaminyl-tRNA cyclotransferase	7932	Vu04	36465543	36473474	PF05096	PTHR31270,PTHR31270:SF0	2.3.2.5	0	0
Vung50265|c0_g2_i2	Vigun07g193700	Vigun07g193700.1	(1 of 1) PTHR21470//PTHR21470:SF3 - NTKL-BINDING PROTEIN 1 // SUBFAMILY NOT NAMED	2623	Vu07	31290928	31293550	PF04949	PTHR21470,PTHR21470:SF3	0	0	0
Vung117121|c0_g1_i2	Vigun10g122100	Vigun10g122100.1	(1 of 11) PTHR32246:SF20 - BON1-ASSOCIATED PROTEIN 1-RELATED	912	Vu10	32969087	32969998	PF00168	PTHR32246,PTHR32246:SF20	0	0	GO:0005515
Vung64184|c0_g1_i1	Vigun03g251500	Vigun03g251500.1	(1 of 1) PTHR21152//PTHR21152:SF1 - AMINOTRANSFERASE CLASS V // PHOSPHOSERINE AMINOTRANSFERASE	5949	Vu03	41769964	41775912	PF00266	PTHR21152,PTHR21152:SF1	2.6.1.52	K00831	0
Vung119086|c2_g3_i1	Vigun07g005900	Vigun07g005900.1	0	897	Vu07	467673	468569	0	0	0	0	0
Vung120807|c0_g1_i1	Vigun03g383200	Vigun03g383200.1	(1 of 1) PTHR31734:SF7 - AUXIN-RESPONSIVE PROTEIN IAA33	1625	Vu03	58782833	58784457	PF02309	PTHR31734,PTHR31734:SF7	0	0	GO:0006355,GO:0005634
Vung126027|c0_g1_i2	Vigun05g177100	Vigun05g177100.1	(1 of 4) PTHR10209:SF168 - 2-OXOGLUTARATE (2OG) AND FE(II)-DEPENDENT OXYGENASE SUPERFAMILY PROTEIN-RELATED	4192	Vu05	33033883	33038074	PF14226,PF03171	PTHR10209,PTHR10209:SF168	1.14.11.32	0	GO:0055114,GO:0016491
Vung124834|c4_g4_i1	Vigun10g186800	Vigun10g186800.1	(1 of 13) PTHR19241//PTHR19241:SF219 - ATP-BINDING CASSETTE TRANSPORTER // ABC TRANSPORTER G FAMILY MEMBER 38	7101	Vu10	40295987	40303087	PF14510,PF08370,PF00005,PF01061	PTHR19241,PTHR19241:SF219	0	0	GO:0016887,GO:0005524,GO:0016020
Vung113687|c0_g2_i1	Vigun05g286100	Vigun05g286100.2	(1 of 1) PTHR31852//PTHR31852:SF17 - FAMILY NOT NAMED // EXPRESSED PROTEIN	1717	Vu05	47348781	47350497	PF03168	PTHR31852,PTHR31852:SF17	0	0	0
Vung141706|c0_g2_i6	Vigun03g144100	Vigun03g144100.2	(1 of 1) PTHR21404 - HEN1	8138	Vu03	14590308	14598445	PF13847	PTHR21404	0	0	GO:0008173,GO:0008171,GO:0001510
Vung124834|c4_g6_i15	Vigun10g186800	Vigun10g186800.1	(1 of 13) PTHR19241//PTHR19241:SF219 - ATP-BINDING CASSETTE TRANSPORTER // ABC TRANSPORTER G FAMILY MEMBER 38	7101	Vu10	40295987	40303087	PF14510,PF08370,PF00005,PF01061	PTHR19241,PTHR19241:SF219	0	0	GO:0016887,GO:0005524,GO:0016020
Vung153306|c0_g1_i1	Vigun02g204100	Vigun02g204100.1	0	1676	Vu02	33756818	33758493	0	PTHR27000,PTHR27000:SF60	0	0	0
Vung143902|c0_g1_i1	Vigun10g146700	Vigun10g146700.1	(1 of 2) PTHR13683:SF308 - ASPARTYL PROTEASE-RELATED	1676	Vu10	36475138	36476813	PF00026	PTHR13683,PTHR13683:SF308	3.4.23.12	0	GO:0006508,GO:0004190
Vung84947|c1_g1_i6	Vigun10g113300	Vigun10g113300.1	(1 of 2) PTHR10663//PTHR10663:SF42 - GUANYL-NUCLEOTIDE EXCHANGE FACTOR // PROTEIN BOI2	13638	Vu10	31505982	31519619	PF16206,PF09324,PF12783,PF01369	PTHR10663,PTHR10663:SF42	0	0	GO:0032012,GO:0005086
Vung74310|c2_g3_i9	Vigun08g021800	Vigun08g021800.1	(1 of 11) 3.1.1.26 - Galactolipase	2745	Vu08	1908611	1911355	PF01734	PTHR32176	3.1.1.26	0	GO:0006629
Vung109148|c1_g1_i6	Vigun04g092700	Vigun04g092700.1	(1 of 3) 5.3.99.6 - Allene-oxide cyclase	2379	Vu04	18052059	18054437	PF06351	PTHR31843,PTHR31843:SF2	5.3.99.6	K10525	GO:0016853,GO:0009507
Vung83335|c1_g1_i6	Vigun05g146000	Vigun05g146000.1	(1 of 23) PTHR33107:SF5 - KUNITZ FAMILY TRYPSIN AND PROTEASE INHIBITOR PROTEIN-RELATED	809	Vu05	19963843	19964651	PF00197	PTHR33107,PTHR33107:SF5	0	0	GO:0004866
Vung144324|c1_g1_i5	Vigun11g167500	Vigun11g167500.1	(1 of 7) PF06075 - Plant protein of unknown function (DUF936) (DUF936)	5320	Vu11	37445419	37450738	PF06075	PTHR31928,PTHR31928:SF4	0	0	0
Vung70149|c1_g1_i5	Vigun03g033300	Vigun03g033300.1	(1 of 2) K09490 - heat shock 70kDa protein 5 (HSPA5, BIP)	4364	Vu03	2563282	2567645	PF00012	PTHR19375,PTHR19375:SF228	0	K09490	0
Vung164377|c0_g1_i1	Vigun07g000800	Vigun07g000800.1	(1 of 15) PF14576//PF14577 - Sieve element occlusion N-terminus (SEO_N) // Sieve element occlusion C-terminus (SEO_C)	3273	Vu07	76934	80206	PF14577,PF14576	PTHR33232,PTHR33232:SF5	0	0	0
Vung77513|c0_g1_i2	Vigun06g097200	Vigun06g097200.1	(1 of 1) PTHR27007:SF47 - L-TYPE LECTIN-DOMAIN CONTAINING RECEPTOR KINASE VIII.1-RELATED	2037	Vu06	22845899	22847935	PF00069,PF00139	PTHR27007,PTHR27007:SF47	2.7.11.1	0	GO:0006468,GO:0005524,GO:0004672,GO:0030246
Vung60393|c1_g1_i5	Vigun07g218200	Vigun07g218200.1	(1 of 4) 4.1.1.22 - Histidine decarboxylase / L-histidine carboxy-lyase	3739	Vu07	34030913	34034651	PF00282	PTHR11999,PTHR11999:SF83	4.1.1.22	K01590	GO:0030170,GO:0019752,GO:0016831
Vung165563|c1_g1_i2	Vigun03g164200	Vigun03g164200.1	(1 of 3) PTHR11680//PTHR11680:SF11 - SERINE HYDROXYMETHYLTRANSFERASE // SUBFAMILY NOT NAMED	2745	Vu03	18570568	18573312	PF00464	PTHR11680,PTHR11680:SF11	2.1.2.1	K00600	GO:0016740
Vung111958|c0_g1_i2	Vigun08g194700	Vigun08g194700.1	(1 of 2) PTHR32116//PTHR32116:SF30 - FAMILY NOT NAMED // GALACTURONOSYLTRANSFERASE 15-RELATED	5124	Vu08	36101147	36106270	PF01501	PTHR32116,PTHR32116:SF30	2.4.1.43	K13648	GO:0016757,GO:0047262
Vung39696|c0_g2_i2	Vigun08g128400	Vigun08g128400.1	(1 of 2) PTHR13683//PTHR13683:SF263 - ASPARTYL PROTEASES // SUBFAMILY NOT NAMED	2283	Vu08	29858474	29860756	PF00026	PTHR13683,PTHR13683:SF263	3.4.23.12	0	GO:0006508,GO:0004190
Vung111104|c0_g2_i5	Vigun05g225500	Vigun05g225500.1	(1 of 2) PTHR31235:SF39 - PEROXIDASE 3-RELATED	2051	Vu05	41777732	41779782	PF00141	PTHR31235,PTHR31235:SF39	1.11.1.7	K00430	GO:0055114,GO:0020037,GO:0006979,GO:0004601
Vung66222|c1_g1_i2	Vigun06g214500	Vigun06g214500.2	(1 of 4) PTHR23042:SF61 - TRANSCRIPTION FACTOR BHLH18-RELATED	2943	Vu06	32588044	32590986	PF00010	PTHR23042,PTHR23042:SF61	0	0	GO:0046983
Vung110689|c0_g1_i5	Vigun07g205800	Vigun07g205800.1	(1 of 2) K13696 - abhydrolase domain-containing protein 1/3 (ABHD1_3)	4856	Vu07	32744222	32749077	PF12146	PTHR10794,PTHR10794:SF56	2.3.1.84	K13696	0
Vung85627|c0_g1_i1	Vigun07g171200	Vigun07g171200.1	(1 of 8) PTHR13683//PTHR13683:SF268 - ASPARTYL PROTEASES // EUKARYOTIC ASPARTYL PROTEASE FAMILY PROTEIN	1486	Vu07	28637225	28638710	PF14543,PF14541	PTHR13683,PTHR13683:SF268	3.4.23.12	0	GO:0006508,GO:0004190
Vung68635|c1_g1_i6	Vigun08g211400	Vigun08g211400.1	(1 of 3) PTHR22601:SF8 - OLIGOPEPTIDE TRANSPORTER 1-RELATED	3695	Vu08	37314275	37317969	PF03169	PTHR22601,PTHR22601:SF8	0	0	GO:0055085
Vung137946|c0_g2_i1	Vigun09g243000	Vigun09g243000.1	(1 of 2) 4.2.1.92 - Hydroperoxide dehydratase / Hydroperoxide isomerase	1916	Vu09	41210099	41212014	PF00067	PTHR24286,PTHR24286:SF50	4.2.1.92	K01723	GO:0055114,GO:0020037,GO:0016705,GO:0005506
Vung35496|c0_g1_i1	Vigun01g124200	Vigun01g124200.1	(1 of 3) PTHR33493//PTHR33493:SF2 - FAMILY NOT NAMED // LATE EMBRYOGENESIS ABUNDANT PROTEIN 4-5	889	Vu01	30107016	30107904	PF03760	PTHR33493,PTHR33493:SF2	0	0	GO:0009790
Vung129348|c0_g1_i11	Vigun06g148500	Vigun06g148500.1	(1 of 1) 2.5.1.1//2.5.1.10 - Dimethylallyltranstransferase / Prenyltransferase // (2E,6E)-farnesyl diphosphate synthase / Geranyltranstransferase	4484	Vu06	27339308	27343791	PF00348	PTHR11525	2.5.1.10,2.5.1.1	K00787	GO:0008299
Vung58002|c0_g2_i1	Vigun03g314100	Vigun03g314100.1	(1 of 3) PTHR10891//PTHR10891:SF590 - EF-HAND CALCIUM-BINDING DOMAIN CONTAINING PROTEIN // SUBFAMILY NOT NAMED	1226	Vu03	50711330	50712555	PF13202,PF13499	PTHR10891,PTHR10891:SF590	0	K13448	GO:0005509
Vung83426|c0_g1_i1	Vigun05g200400	Vigun05g200400.1	(1 of 3) PTHR23050//PTHR23050:SF170 - CALCIUM BINDING PROTEIN // SUBFAMILY NOT NAMED	841	Vu05	38730009	38730849	PF13833	PTHR23050,PTHR23050:SF170	0	0	0
Vung137421|c5_g3_i7	Vigun03g379700	Vigun03g379700.1	(1 of 1) 1.1.1.267//2.2.1.7 - 1-deoxy-D-xylulose-5-phosphate reductoisomerase / DXP-reductoisomerase // 1-deoxy-D-xylulose-5-phosphate synthase / DXP-synthase	3771	Vu03	58394423	58398193	PF02780,PF02779,PF13292	PTHR11624,PTHR11624:SF84	2.2.1.7,1.1.1.267	K01662	GO:0008152,GO:0003824,GO:0016114,GO:0008661
Vung68011|c0_g2_i4	Vigun10g155100	Vigun10g155100.1	(1 of 1) K14846 - ribosome production factor 1 (RPF1)	4257	Vu10	37508671	37512927	PF04427	PTHR22734,PTHR22734:SF3	0	K14846	0
Vung22868|c0_g1_i1	Vigun08g131900	Vigun08g131900.1	0	1281	Vu08	30284620	30285900	0	PTHR31945,PTHR31945:SF8	0	0	0
Vung75963|c0_g1_i1	Vigun11g142600	Vigun11g142600.1	0	1397	Vu11	35232153	35233549	0	PTHR35718	0	0	0
Vung138367|c0_g1_i5	Vigun07g261200	Vigun07g261200.1	0	4145	Vu07	37749854	37753998	0	PTHR31414,PTHR31414:SF8	0	0	0
Vung163157|c0_g1_i1	Vigun03g286000	Vigun03g286000.1	(1 of 1) PTHR23091//PTHR23091:SF211 - N-TERMINAL ACETYLTRANSFERASE // N-ACETYLTRANSFERASE HLS1-LIKE-RELATED	2643	Vu03	46769604	46772246	PF00583	PTHR23091,PTHR23091:SF211	0	0	GO:0008080
Vung61828|c1_g1_i3	Vigun08g057100	Vigun08g057100.1	(1 of 6) PF04862 - Protein of unknown function (DUF642) (DUF642)	7153	Vu08	7173847	7180999	PF04862	PTHR31265,PTHR31265:SF3	0	0	0
Vung102600|c0_g4_i1	Vigun10g191000	Vigun10g191000.1	(1 of 1) K00507 - stearoyl-CoA desaturase (delta-9 desaturase) (SCD, desC)	2945	Vu10	40540167	40543111	PF00487	PTHR11351,PTHR11351:SF2	0	K00507	GO:0006629
Vung18691|c0_g1_i1	Vigun06g127100	Vigun06g127100.1	(1 of 3) PTHR33472//PTHR33472:SF1 - FAMILY NOT NAMED // EXTENSIN-RELATED	1409	Vu06	25406095	25407503	0	PTHR33472,PTHR33472:SF1	0	0	0
Vung19844|c5_g3_i2	Vigun04g039000	Vigun04g039000.1	(1 of 2) PTHR11999:SF113 - GLUTAMATE DECARBOXYLASE 2	2436	Vu04	3270455	3272890	PF00282	PTHR11999,PTHR11999:SF113	4.1.1.15	K01580	GO:0030170,GO:0019752,GO:0016831
Vung112284|c1_g1_i1	Vigun08g164000	Vigun08g164000.1	(1 of 9) 3.5.1.52 - Peptide-N(4)-(N-acetyl-beta-glucosaminyl)asparagine amidase / N-oligosaccharide glycopeptidase	1901	Vu08	33630018	33631918	PF12222	PTHR31104,PTHR31104:SF2	3.5.1.52	0	0
Vung111248|c1_g2_i5	Vigun11g000900	Vigun11g000900.1	(1 of 1) PTHR11566//PTHR11566:SF69 - DYNAMIN // SUBFAMILY NOT NAMED	11179	Vu11	139662	150840	PF01926,PF02212,PF00169,PF01031	PTHR11566,PTHR11566:SF69	3.6.5.5	K01528	GO:0005525,GO:0003924
Vung97074|c0_g1_i1	Vigun03g191600	Vigun03g191600.1	0	970	Vu03	26545526	26546495	0	PTHR35094,PTHR35094:SF1	0	0	0
Vung104005|c0_g2_i7	Vigun03g378500	Vigun03g378500.2	(1 of 2) KOG1169 - Diacylglycerol kinase	6881	Vu03	58246802	58253682	PF00781,PF00609	PTHR11255	2.7.1.107	K00901	GO:0016301,GO:0007205,GO:0004143
Vung47701|c0_g1_i1	Vigun06g088500	Vigun06g088500.1	(1 of 3) 1.14.13.11 - Trans-cinnamate 4-monooxygenase / Cinnamic acid 4-monooxygenase	3026	Vu06	22074430	22077455	PF00067	PTHR24298,PTHR24298:SF56	1.14.13.11	K00487	GO:0055114,GO:0020037,GO:0016705,GO:0005506
Vung12315|c7_g3_i1	Vigun06g137600	Vigun06g137600.1	(1 of 46) 1.3.3.8 - Tetrahydroberberine oxidase / THB oxidase	2006	Vu06	26313595	26315600	PF08031,PF01565	PTHR32448	1.3.3.8	0	GO:0055114,GO:0050660,GO:0016491
Vung93182|c0_g1_i1	Vigun02g202900	Vigun02g202900.1	(1 of 1) 2.7.7.48//3.4.22.44//3.4.22.45 - RNA-directed RNA polymerase / RNA nucleotidyltransferase (RNA-directed) // Nuclear-inclusion-a endopeptidase / Potyvirus NIa protease // Helper-component proteinase / HC-Pro	2350	Vu02	33686588	33688937	0	0	2.7.7.48,3.4.22.44,3.4.22.45	0	0
Vung117187|c0_g1_i1	Vigun09g074100	Vigun09g074100.1	(1 of 2) PTHR10641//PTHR10641:SF641 - MYB-LIKE DNA-BINDING PROTEIN MYB // MYB FAMILY TRANSCRIPTION FACTOR	1756	Vu09	8300544	8302299	PF00249	PTHR10641,PTHR10641:SF641	0	K09422	0
Vung130597|c0_g1_i1	Vigun04g090600	Vigun04g090600.1	(1 of 4) PTHR22835//PTHR22835:SF164 - ZINC FINGER FYVE DOMAIN CONTAINING PROTEIN // SUBFAMILY NOT NAMED	4823	Vu04	16415477	16420299	PF00657	PTHR22835,PTHR22835:SF164	3.1.1.3	0	GO:0016788
Vung71305|c1_g3_i1	Vigun06g101700	Vigun06g101700.1	(1 of 24) 1.13.11.58 - Linoleate 9S-lipoxygenase / Linoleate 9-lipoxygenase	5501	Vu06	23190983	23196483	PF01477,PF00305	PTHR11771,PTHR11771:SF48	1.13.11.58	K15718	GO:0005515,GO:0055114,GO:0046872,GO:0016702
Vung30234|c0_g1_i13	Vigun08g184200	Vigun08g184200.1	(1 of 2) PTHR31326:SF3 - CRT (CHLOROQUINE-RESISTANCE TRANSPORTER)-LIKE TRANSPORTER 1-RELATED	3665	Vu08	35338169	35341833	PF08627	PTHR31326,PTHR31326:SF3	0	0	0
Vung83475|c0_g1_i1	Vigun03g047700	Vigun03g047700.1	(1 of 34) PF00314 - Thaumatin family (Thaumatin)	678	Vu03	3801140	3801817	PF00314	PTHR31048,PTHR31048:SF36	0	0	0
Vung44524|c0_g1_i1	Vigun05g240000	Vigun05g240000.1	(1 of 2) PTHR21022//PTHR21022:SF5 - PREPHENATE DEHYDRATASE P PROTEIN // SUBFAMILY NOT NAMED	1995	Vu05	43303408	43305402	PF00800	PTHR21022,PTHR21022:SF5	4.2.1.91	K05359	GO:0009094,GO:0004664
Vung16208|c0_g1_i1	Vigun06g210600	Vigun06g210600.1	(1 of 2) PTHR27002//PTHR27002:SF93 - FAMILY NOT NAMED // RECEPTOR-LIKE SERINE/THREONINE-PROTEIN KINASE SD1-6-RELATED	5514	Vu06	32360559	32366072	PF11883,PF08276,PF01453,PF00954,PF07714	PTHR27002,PTHR27002:SF93	2.7.11.1	0	GO:0004674,GO:0048544,GO:0006468,GO:0004672
Vung33150|c0_g1_i1	Vigun05g212800	Vigun05g212800.1	(1 of 3) PTHR35274//PTHR35274:SF2 - FAMILY NOT NAMED // EXPRESSED PROTEIN-RELATED	1502	Vu05	40371577	40373078	0	PTHR35274,PTHR35274:SF2	3.4.19.12,3.4.22.69	0	0
Vung98861|c0_g1_i2	Vigun08g173700	Vigun08g173700.1	(1 of 1) PTHR22298:SF59 - ENDOGLUCANASE 11	3595	Vu08	34431956	34435550	PF00759	PTHR22298,PTHR22298:SF59	3.2.1.4	0	GO:0005975,GO:0004553
Vung79401|c0_g1_i1	Vigun05g254200	Vigun05g254200.1	(1 of 4) PTHR31561:SF24 - 3-KETOACYL-COA SYNTHASE 12-RELATED	2195	Vu05	44879659	44881853	PF08541,PF08392	PTHR31561,PTHR31561:SF24	2.3.1.199	K15397	GO:0016747,GO:0008610,GO:0016020,GO:0006633
Vung87270|c0_g2_i1	Vigun09g240700	Vigun09g240700.1	(1 of 2) PTHR10641//PTHR10641:SF611 - MYB-LIKE DNA-BINDING PROTEIN MYB // SUBFAMILY NOT NAMED	1261	Vu09	41065817	41067077	PF00249	PTHR10641,PTHR10641:SF611	0	0	0
Vung166443|c1_g1_i1	Vigun03g007300	Vigun03g007300.1	(1 of 2) PTHR31852//PTHR31852:SF44 - FAMILY NOT NAMED // EMB|CAB53482.1	1614	Vu03	494597	496210	PF03168	PTHR31852,PTHR31852:SF44	0	0	0
Vung137353|c0_g1_i1	Vigun03g185200	Vigun03g185200.1	(1 of 3) PTHR23024:SF157 - CARBOXYLESTERASE 12-RELATED	1586	Vu03	24414558	24416143	PF00135	PTHR23024,PTHR23024:SF157	3.1.1.1	0	0
Vung158235|c2_g1_i1	Vigun01g216300	Vigun01g216300.1	(1 of 5) PTHR10891:SF573 - CALCIUM-BINDING PROTEIN CML24-RELATED	2330	Vu01	39002283	39004612	PF13499	PTHR10891,PTHR10891:SF573	0	K13448	0
Vung120509|c1_g2_i7	Vigun11g006000	Vigun11g006000.1	(1 of 1) PTHR22838//PTHR22838:SF4 - WD REPEAT PROTEIN 26-RELATED // WD REPEAT-CONTAINING PROTEIN 13	7530	Vu11	634616	642145	PF00400	PTHR22838,PTHR22838:SF4	0	0	GO:0005515
Vung113069|c4_g3_i1	Vigun02g010900	Vigun02g010900.1	(1 of 2) PTHR24096:SF134 - LONG CHAIN ACYL-COA SYNTHETASE 2	6677	Vu02	4260524	4267200	PF00501	PTHR24096,PTHR24096:SF134	6.2.1.3	K01897	GO:0008152,GO:0003824
Vung80119|c0_g1_i1	Vigun07g170100	Vigun07g170100.1	(1 of 5) 2.3.1.119//2.3.1.199 - Transferred entry: 1.1.1.330, 1.3.1.93, 2.3.1.199 and 4.2.1.134 // Very-long-chain 3-oxoacyl-CoA synthase / Very-long-chain beta-ketoacyl-CoA synthase	2493	Vu07	28437257	28439749	PF08541,PF08392	PTHR31561,PTHR31561:SF25	2.3.1.199,2.3.1.119	K15397	GO:0016747,GO:0008610,GO:0016020,GO:0006633
Vung76255|c1_g1_i4	Vigun03g136100	Vigun03g136100.3	(1 of 4) 4.1.1.22 - Histidine decarboxylase / L-histidine carboxy-lyase	3784	Vu03	13327499	13331282	PF00282	PTHR11999,PTHR11999:SF83	4.1.1.22	K01590	GO:0030170,GO:0019752,GO:0016831
Vung76255|c1_g1_i3	Vigun03g136100	Vigun03g136100.3	(1 of 4) 4.1.1.22 - Histidine decarboxylase / L-histidine carboxy-lyase	3784	Vu03	13327499	13331282	PF00282	PTHR11999,PTHR11999:SF83	4.1.1.22	K01590	GO:0030170,GO:0019752,GO:0016831
Vung5173|c1_g2_i4	Vigun05g283600	Vigun05g283600.1	(1 of 4) PTHR11654:SF157 - PROTEIN NRT1/ PTR FAMILY 1.1-RELATED	3213	Vu05	47194705	47197917	PF00854	PTHR11654,PTHR11654:SF157	0	0	GO:0016020,GO:0006810,GO:0005215
Vung8032|c1_g2_i3	Vigun04g047900	Vigun04g047900.1	(1 of 1) PTHR23070//PTHR23070:SF5 - BCS1 AAA-TYPE ATPASE // AAA-TYPE ATPASE FAMILY PROTEIN-RELATED	2003	Vu04	4133224	4135226	PF00004,PF14363	PTHR23070,PTHR23070:SF5	0	0	GO:0005524
Vung8032|c1_g2_i4	Vigun04g047900	Vigun04g047900.1	(1 of 1) PTHR23070//PTHR23070:SF5 - BCS1 AAA-TYPE ATPASE // AAA-TYPE ATPASE FAMILY PROTEIN-RELATED	2003	Vu04	4133224	4135226	PF00004,PF14363	PTHR23070,PTHR23070:SF5	0	0	GO:0005524
Vung121493|c0_g2_i1	Vigun08g120400	Vigun08g120400.1	(1 of 4) K10257 - omega-3 fatty acid desaturase (delta-15 desaturase) (FAD8, desB)	4667	Vu08	28893749	28898415	PF11960,PF00487	PTHR32100,PTHR32100:SF20	0	K10257	GO:0055114,GO:0016717,GO:0006629
Vung55974|c3_g4_i4	Vigun01g160300	Vigun01g160300.1	(1 of 4) K10775 - phenylalanine ammonia-lyase (E4.3.1.24)	3094	Vu01	34211884	34214977	PF00221	PTHR10362,PTHR10362:SF19	4.3.1.24	K10775	0
Vung155562|c3_g2_i1	Vigun01g150500	Vigun01g150500.1	(1 of 5) PTHR19375:SF232 - MEDIATOR OF RNA POLYMERASE II TRANSCRIPTION SUBUNIT 37E-RELATED	2981	Vu01	33273067	33276047	PF00012	PTHR19375,PTHR19375:SF232	0	K03283	0
Vung113069|c4_g3_i3	Vigun02g010900	Vigun02g010900.1	(1 of 2) PTHR24096:SF134 - LONG CHAIN ACYL-COA SYNTHETASE 2	6677	Vu02	4260524	4267200	PF00501	PTHR24096,PTHR24096:SF134	6.2.1.3	K01897	GO:0008152,GO:0003824
Vung103043|c0_g2_i2	Vigun06g140900	Vigun06g140900.1	(1 of 1) K14793 - ribosomal RNA-processing protein 9 (RRP9)	3707	Vu06	26649847	26653553	PF00400	PTHR19865,PTHR19865:SF0	0	K14793	GO:0005515
Vung125290|c0_g1_i1	Vigun03g235300	Vigun03g235300.1	(1 of 1) PTHR31375:SF29 - PECTIN LYASE-LIKE PROTEIN-RELATED	4633	Vu03	39161176	39165808	PF00295	PTHR31375,PTHR31375:SF29	3.2.1.15	0	GO:0005975,GO:0004650
Vung152585|c0_g1_i1	Vigun08g091000	Vigun08g091000.1	(1 of 2) PTHR31985:SF37 - ETHYLENE-RESPONSIVE TRANSCRIPTION FACTOR ERF014	1210	Vu08	21211997	21213206	PF00847	PTHR31985,PTHR31985:SF37	0	0	GO:0006355,GO:0003700
Vung72345|c1_g1_i3	Vigun08g027700	Vigun08g027700.1	(1 of 3) 3.5.1.1 - Asparaginase / L-asparagine amidohydrolase	2498	Vu08	2506230	2508727	PF01112	PTHR10188,PTHR10188:SF13	3.5.1.1	K13051	GO:0016787
Vung50622|c0_g1_i1	Vigun08g104900	Vigun08g104900.1	(1 of 10) K10664 - E3 ubiquitin-protein ligase ATL6/9/15/31/42/55 [EC:6.3.2.19] (ATL6S)	1170	Vu08	26094783	26095952	PF13639	PTHR14155	0	K10664	GO:0008270,GO:0005515
Vung87835|c5_g2_i3	Vigun06g141300	Vigun06g141300.1	(1 of 7) PTHR31388//PTHR31388:SF22 - FAMILY NOT NAMED // PEROXIDASE 22-RELATED	2554	Vu06	26689771	26692324	PF00141	PTHR31388,PTHR31388:SF22	1.11.1.7	K00430	GO:0055114,GO:0020037,GO:0006979,GO:0004601
Vung8038|c0_g1_i1	Vigun08g199500	Vigun08g199500.1	(1 of 1) PTHR12001//PTHR12001:SF57 - GERANYLGERANYL PYROPHOSPHATE SYNTHASE // SUBFAMILY NOT NAMED	1201	Vu08	36447018	36448218	PF00348	PTHR12001,PTHR12001:SF57	2.5.1.29	K13789	GO:0008299
Vung138657|c2_g1_i15	Vigun04g126600	Vigun04g126600.1	(1 of 3) 4.4.1.4 - Alliin lyase / L-cysteine sulfoxide lyase	3814	Vu04	31951264	31955077	PF04863,PF04864	PTHR11751,PTHR11751:SF126	4.4.1.4	0	GO:0016846
Vung108210|c0_g2_i3	Vigun11g116400	Vigun11g116400.1	(1 of 2) PTHR11206//PTHR11206:SF143 - MULTIDRUG RESISTANCE PROTEIN // SUBFAMILY NOT NAMED	4244	Vu11	32146980	32151223	PF01554	PTHR11206,PTHR11206:SF143	0	K03327	GO:0055085,GO:0016020,GO:0015297,GO:0015238,GO:0006855
Vung114940|c0_g1_i1	Vigun03g351700	Vigun03g351700.1	0	589	Vu03	55352118	55352706	0	PTHR34198,PTHR34198:SF2	0	0	0
Vung162906|c4_g1_i3	Vigun06g027000	Vigun06g027000.4	(1 of 2) PTHR24343:SF189 - CBL-INTERACTING SERINE/THREONINE-PROTEIN KINASE 3	8826	Vu06	12106195	12115020	PF03822,PF07714	PTHR24343,PTHR24343:SF189	2.7.11.1	0	GO:0007165,GO:0006468,GO:0004672
Vung92261|c0_g1_i1	Vigun06g163900	Vigun06g163900.1	(1 of 2) PTHR11132:SF112 - GLUCOSE-6-PHOSPHATE/PHOSPHATE TRANSLOCATOR 1, CHLOROPLASTIC-RELATED	2343	Vu06	28614303	28616645	PF03151	PTHR11132,PTHR11132:SF112	0	K15283	0
Vung73269|c0_g1_i1	Vigun01g180400	Vigun01g180400.1	(1 of 2) PTHR22849:SF38 - E3 UBIQUITIN-PROTEIN LIGASE PUB22-RELATED	1621	Vu01	36132768	36134388	PF04564	PTHR22849,PTHR22849:SF38	6.3.2.19	0	GO:0016567,GO:0004842
Vung74310|c2_g3_i20	Vigun08g021800	Vigun08g021800.1	(1 of 11) 3.1.1.26 - Galactolipase	2745	Vu08	1908611	1911355	PF01734	PTHR32176	3.1.1.26	0	GO:0006629
Vung144782|c0_g1_i1	Vigun06g048100	Vigun06g048100.1	(1 of 2) PTHR23155//PTHR23155:SF508 - LEUCINE-RICH REPEAT-CONTAINING PROTEIN // SUBFAMILY NOT NAMED	1110	Vu06	17244886	17245995	PF00931	PTHR23155,PTHR23155:SF508	0	0	GO:0043531
Vung18120|c3_g1_i6	Vigun05g096200	Vigun05g096200.1	(1 of 2) PTHR11431//PTHR11431:SF44 - FERRITIN // SUBFAMILY NOT NAMED	2779	Vu05	9351812	9354590	PF00210	PTHR11431,PTHR11431:SF44	1.16.3.1	K00522	GO:0008199,GO:0006879,GO:0006826
Vung116016|c0_g1_i1	Vigun10g019700	Vigun10g019700.1	(1 of 1) 2.7.4.14//2.7.4.22//2.7.4.25 - UMP/CMP kinase / Uridine monophosphate-cytidine monophosphate phosphotransferase // UMP kinase / Uridylate kinase // (d)CMP kinase / Deoxycytidylate kinase	5879	Vu10	2246630	2252508	PF13238	PTHR23359,PTHR23359:SF100	2.7.4.25,2.7.4.22,2.7.4.14	K13800	GO:0019205,GO:0006139,GO:0005524
Vung126027|c1_g4_i4	Vigun05g177100	Vigun05g177100.1	(1 of 4) PTHR10209:SF168 - 2-OXOGLUTARATE (2OG) AND FE(II)-DEPENDENT OXYGENASE SUPERFAMILY PROTEIN-RELATED	4192	Vu05	33033883	33038074	PF14226,PF03171	PTHR10209,PTHR10209:SF168	1.14.11.32	0	GO:0055114,GO:0016491
Vung50114|c0_g1_i1	Vigun01g077800	Vigun01g077800.1	0	852	Vu01	21936127	21936978	0	0	0	0	0
Vung75284|c0_g1_i1	Vigun05g013300	Vigun05g013300.1	(1 of 5) PTHR19375:SF232 - MEDIATOR OF RNA POLYMERASE II TRANSCRIPTION SUBUNIT 37E-RELATED	3014	Vu05	1053294	1056307	PF00012	PTHR19375,PTHR19375:SF232	0	K03283	0
Vung22208|c0_g1_i2	Vigun07g215900	Vigun07g215900.1	0	981	Vu07	33780298	33781278	0	0	0	0	0
Vung116633|c2_g2_i8	Vigun09g131900	Vigun09g131900.2	(1 of 1) PTHR30540//PTHR30540:SF6 - OSMOTIC STRESS POTASSIUM TRANSPORTER // POTASSIUM TRANSPORTER 2	6023	Vu09	29035562	29041584	PF02705	PTHR30540,PTHR30540:SF6	0	K03549	GO:0071805,GO:0016020,GO:0015079
Vung79186|c0_g1_i2	Vigun11g094300	Vigun11g094300.1	(1 of 3) PTHR22595//PTHR22595:SF61 - CHITINASE-RELATED // SUBFAMILY NOT NAMED	1165	Vu11	27698849	27700013	PF00187,PF00182	PTHR22595,PTHR22595:SF61	3.2.1.14	K01183	GO:0008061,GO:0016998,GO:0006032,GO:0004568
Vung97935|c0_g1_i1	Vigun08g221000	Vigun08g221000.1	0	1128	Vu08	37953632	37954759	0	0	0	0	0
Vung21449|c3_g3_i1	Vigun09g014000	Vigun09g014000.1	(1 of 5) K10393 - kinesin family member 2/24 (KIF2_24, MCAK)	8575	Vu09	1033137	1041711	PF00225	PTHR24115,PTHR24115:SF511	3.6.4.4	K10393	GO:0008017,GO:0007018,GO:0005524,GO:0003777,GO:0005871
Vung148207|c0_g1_i4	Vigun03g214100	Vigun03g214100.2	(1 of 4) PTHR10438:SF278 - THIOREDOXIN H7-RELATED	1520	Vu03	35598196	35599715	PF00085	PTHR10438,PTHR10438:SF278	1.6.5.4	K03671	GO:0045454,GO:0015035,GO:0006662
Vung55926|c1_g1_i1	Vigun01g200400	Vigun01g200400.1	(1 of 4) 1.1.1.145 - 3-beta-hydroxy-Delta(5)-steroid dehydrogenase / Progesterone reductase	1179	Vu01	37673986	37675164	PF13561	PTHR24322,PTHR24322:SF498	1.1.1.145,1.1.1.51	0	0
Vung62457|c0_g1_i2	Vigun06g235500	Vigun06g235500.1	(1 of 1) PTHR10374//PTHR10374:SF13 - LACTOYLGLUTATHIONE LYASE GLYOXALASE I // SUBFAMILY NOT NAMED	1682	Vu06	34096261	34097942	PF12681	PTHR10374,PTHR10374:SF13	0	0	0
Vung148277|c0_g2_i1	Vigun03g210900	Vigun03g210900.1	(1 of 3) PTHR12565//PTHR12565:SF148 - STEROL REGULATORY ELEMENT-BINDING PROTEIN // PROTEIN BANQUO 3	1637	Vu03	34826086	34827722	PF00010	PTHR12565,PTHR12565:SF148	0	0	GO:0046983
Vung34621|c0_g1_i1	Vigun03g217800	Vigun03g217800.1	(1 of 2) PTHR24286//PTHR24286:SF10 - FAMILY NOT NAMED // ABSCISIC ACID 8'-HYDROXYLASE 1-RELATED	2611	Vu03	36266806	36269416	PF00067	PTHR24286,PTHR24286:SF10	1.14.13.93	0	GO:0055114,GO:0020037,GO:0016705,GO:0005506
Vung115315|c0_g1_i1	Vigun02g202100	Vigun02g202100.1	(1 of 2) PTHR22765//PTHR22765:SF54 - RING FINGER AND PROTEASE ASSOCIATED DOMAIN-CONTAINING // VACUOLAR-SORTING RECEPTOR 3-RELATED	4440	Vu02	33647005	33651444	PF12662,PF02225	PTHR22765,PTHR22765:SF54	0	0	0
Vung10561|c1_g2_i2	Vigun01g201000	Vigun01g201000.1	(1 of 2) PTHR11964//PTHR11964:SF18 - S-ADENOSYLMETHIONINE SYNTHETASE // S-ADENOSYLMETHIONINE SYNTHASE 2	2456	Vu01	37740464	37742919	PF00438,PF02772,PF02773	PTHR11964,PTHR11964:SF18	2.5.1.6	K00789	GO:0006556,GO:0004478,GO:0005524
Vung123932|c0_g1_i1	Vigun04g036700	Vigun04g036700.1	(1 of 2) PTHR31948//PTHR31948:SF16 - FAMILY NOT NAMED // ZINC-FINGER HOMEODOMAIN PROTEIN 14	519	Vu04	3054718	3055236	PF04770	PTHR31948,PTHR31948:SF16	0	0	0
Vung37871|c1_g1_i4	Vigun03g111900	Vigun03g111900.1	(1 of 3) 1.10.3.1//1.14.18.1 - Catechol oxidase / Tyrosinase // Tyrosinase / Tyrosine-dopa oxidase	2218	Vu03	10165487	10167704	PF12142,PF00264,PF12143	PTHR11474,PTHR11474:SF33	1.14.18.1,1.10.3.1	0	GO:0055114,GO:0004097,GO:0016491,GO:0008152
Vung71467|c1_g1_i2	Vigun01g143700	Vigun01g143700.2	(1 of 4) PTHR10108:SF906 - METHYLTRANSFERASE PMT1-RELATED	5902	Vu01	32522425	32528326	PF03141	PTHR10108,PTHR10108:SF906	2.1.1.103	0	GO:0008168
Vung25920|c1_g1_i2	Vigun06g165300	Vigun06g165300.1	(1 of 8) PTHR13683//PTHR13683:SF268 - ASPARTYL PROTEASES // EUKARYOTIC ASPARTYL PROTEASE FAMILY PROTEIN	1590	Vu06	28720087	28721676	PF14543,PF14541	PTHR13683,PTHR13683:SF268	3.4.23.12	0	GO:0006508,GO:0004190
Vung85030|c0_g1_i1	Vigun06g206600	Vigun06g206600.1	0	1024	Vu06	32058710	32059733	0	PTHR36615,PTHR36615:SF2	0	0	0
Vung146951|c0_g1_i1	Vigun05g089200	Vigun05g089200.1	(1 of 4) PTHR33257//PTHR33257:SF5 - FAMILY NOT NAMED // EXPRESSED PROTEIN	1161	Vu05	8549799	8550959	0	PTHR33257,PTHR33257:SF5	0	0	0
Vung111104|c0_g2_i6	Vigun05g225500	Vigun05g225500.1	(1 of 2) PTHR31235:SF39 - PEROXIDASE 3-RELATED	2051	Vu05	41777732	41779782	PF00141	PTHR31235,PTHR31235:SF39	1.11.1.7	K00430	GO:0055114,GO:0020037,GO:0006979,GO:0004601
Vung166781|c1_g1_i5	Vigun03g191900	Vigun03g191900.1	(1 of 1) 2.1.1.98 - Diphthine synthase	2609	Vu03	26636986	26639594	PF00590	PTHR10882,PTHR10882:SF0	2.1.1.98	K00586	GO:0008168,GO:0008152
Vung166196|c1_g1_i4	Vigun03g117900	Vigun03g117900.1	(1 of 5) 4.2.3.48 - (3S,6E)-nerolidol synthase / Nerolidol synthase	2892	Vu03	10957330	10960221	PF01397,PF03936	PTHR31225,PTHR31225:SF0	4.2.3.48	K15086	GO:0016829,GO:0010333,GO:0008152,GO:0000287
Vung136075|c5_g3_i1	VigunL086100	VigunL086100.1	0	511	contig_693	1929	2439	0	PTHR33047,PTHR33047:SF4	0	0	0
Vung128609|c0_g1_i8	Vigun05g068000	Vigun05g068000.1	(1 of 7) PF00228 - Bowman-Birk serine protease inhibitor family (Bowman-Birk_leg)	561	Vu05	5878404	5878964	PF00228	PTHR33479,PTHR33479:SF1	0	0	GO:0005576,GO:0004867
Vung121778|c1_g1_i1	Vigun08g044700	Vigun08g044700.1	(1 of 2) PTHR10766//PTHR10766:SF46 - TRANSMEMBRANE 9 SUPERFAMILY PROTEIN // ENDOMEMBRANE FAMILY PROTEIN 70	4737	Vu08	4666457	4671193	PF02990	PTHR10766,PTHR10766:SF46	0	K17086	GO:0016021
Vung114907|c0_g1_i2	Vigun05g244700	Vigun05g244700.1	(1 of 6) K16298 - serine carboxypeptidase-like clade IV [EC:3.4.16.-] (SCPL-IV)	3791	Vu05	43787854	43791644	PF00450	PTHR11802,PTHR11802:SF95	3.4.16.5	K16298	GO:0006508,GO:0004185
Vung162906|c4_g1_i10	Vigun06g027000	Vigun06g027000.4	(1 of 2) PTHR24343:SF189 - CBL-INTERACTING SERINE/THREONINE-PROTEIN KINASE 3	8826	Vu06	12106195	12115020	PF03822,PF07714	PTHR24343,PTHR24343:SF189	2.7.11.1	0	GO:0007165,GO:0006468,GO:0004672
Vung127165|c0_g1_i1	Vigun03g210900	Vigun03g210900.1	(1 of 3) PTHR12565//PTHR12565:SF148 - STEROL REGULATORY ELEMENT-BINDING PROTEIN // PROTEIN BANQUO 3	1637	Vu03	34826086	34827722	PF00010	PTHR12565,PTHR12565:SF148	0	0	GO:0046983
Vung59553|c0_g1_i1	Vigun07g176400	Vigun07g176400.1	(1 of 15) PF14576//PF14577 - Sieve element occlusion N-terminus (SEO_N) // Sieve element occlusion C-terminus (SEO_C)	3385	Vu07	29154871	29158255	PF14577,PF14576	PTHR33232,PTHR33232:SF5	0	0	0
Vung41124|c0_g1_i3	Vigun06g141900	Vigun06g141900.1	(1 of 35) KOG0513 - Ca2+-independent phospholipase A2	2474	Vu06	26751724	26754197	PF01734	PTHR32241,PTHR32241:SF6	0	0	GO:0006629
Vung86443|c3_g1_i1	Vigun10g144500	Vigun10g144500.1	0	2832	Vu10	36176867	36179698	0	PTHR36808	0	0	0
Vung158770|c0_g1_i1	Vigun07g233300	Vigun07g233300.1	(1 of 1) PTHR11062:SF52 - GLYCOSYLTRANSFERASE 18	1461	Vu07	35498120	35499580	PF03016	PTHR11062,PTHR11062:SF52	0	0	0
Vung134846|c0_g1_i2	Vigun05g244700	Vigun05g244700.1	(1 of 6) K16298 - serine carboxypeptidase-like clade IV [EC:3.4.16.-] (SCPL-IV)	3791	Vu05	43787854	43791644	PF00450	PTHR11802,PTHR11802:SF95	3.4.16.5	K16298	GO:0006508,GO:0004185
Vung90071|c1_g1_i1	Vigun07g219100	Vigun07g219100.2	(1 of 7) PTHR24223//PTHR24223:SF192 - FAMILY NOT NAMED // ABC TRANSPORTER C FAMILY MEMBER 10	7537	Vu07	34185492	34193028	PF00664,PF00005	PTHR24223,PTHR24223:SF192	3.6.3.44	0	GO:0055085,GO:0042626,GO:0016021,GO:0006810,GO:0005524,GO:0016887
Vung144523|c1_g2_i1	Vigun08g181100	Vigun08g181100.1	(1 of 3) PTHR11413//PTHR11413:SF57 - CYSTATIN FAMILY MEMBER // SUBFAMILY NOT NAMED	1584	Vu08	35064675	35066258	PF16845,PF00031	PTHR11413,PTHR11413:SF57	0	0	GO:0004869
Vung53269|c3_g1_i1	Vigun10g077600	Vigun10g077600.1	0	725	Vu10	21141078	21141802	0	0	0	0	0
Vung166315|c2_g2_i12	Vigun05g249600	Vigun05g249600.1	(1 of 1) 3.2.1.145//3.2.1.23 - Galactan 1,3-beta-galactosidase // Beta-galactosidase / Lactase	6630	Vu05	44339927	44346556	PF02140,PF01301	PTHR23421,PTHR23421:SF58	3.2.1.145,3.2.1.23	0	GO:0030246,GO:0005975,GO:0004553
Vung166315|c2_g2_i6	Vigun05g249600	Vigun05g249600.1	(1 of 1) 3.2.1.145//3.2.1.23 - Galactan 1,3-beta-galactosidase // Beta-galactosidase / Lactase	6630	Vu05	44339927	44346556	PF02140,PF01301	PTHR23421,PTHR23421:SF58	3.2.1.145,3.2.1.23	0	GO:0030246,GO:0005975,GO:0004553
Vung121505|c0_g1_i3	Vigun03g067600	Vigun03g067600.3	(1 of 190) PF00847 - AP2 domain (AP2)	2022	Vu03	5586219	5588240	PF00847	PTHR31190	0	0	GO:0006355,GO:0003700
Vung31131|c0_g1_i1	Vigun06g052500	Vigun06g052500.1	0	752	Vu06	17816103	17816854	0	0	0	0	0
Vung166196|c1_g1_i5	Vigun03g117900	Vigun03g117900.1	(1 of 5) 4.2.3.48 - (3S,6E)-nerolidol synthase / Nerolidol synthase	2892	Vu03	10957330	10960221	PF01397,PF03936	PTHR31225,PTHR31225:SF0	4.2.3.48	K15086	GO:0016829,GO:0010333,GO:0008152,GO:0000287
Vung74786|c4_g1_i9	Vigun10g199900	Vigun10g199900.2	(1 of 1) PTHR12357//PTHR12357:SF29 - YTH YT521-B HOMOLOGY DOMAIN-CONTAINING // SUBFAMILY NOT NAMED	8923	Vu10	41206803	41215725	PF04146	PTHR12357,PTHR12357:SF29	0	0	0
Vung89678|c0_g1_i2	Vigun03g225300	Vigun03g225300.1	(1 of 4) K13422 - transcription factor MYC2 (MYC2)	2407	Vu03	37471013	37473419	PF00010,PF14215	PTHR11514,PTHR11514:SF50	0	K13422	GO:0046983
Vung121573|c0_g1_i3	Vigun03g388300	Vigun03g388300.1	(1 of 1) PTHR11638//PTHR11638:SF123 - ATP-DEPENDENT CLP PROTEASE // CLP AMINO TERMINAL DOMAIN-CONTAINING PROTEIN	4338	Vu03	59445320	59449657	PF02861	PTHR11638,PTHR11638:SF123	0	0	GO:0019538
Vung85417|c0_g1_i2	Vigun04g089800	Vigun04g089800.1	(1 of 1) 1.14.21.6 - Transferred entry: 1.14.19.20	4424	Vu04	16065814	16070237	PF04116	PTHR11863,PTHR11863:SF33	1.14.21.6	K00227	GO:0055114,GO:0016491,GO:0006633,GO:0005506
Vung131749|c2_g2_i1	Vigun10g116100	Vigun10g116100.1	(1 of 3) PTHR23024//PTHR23024:SF113 - MEMBER OF 'GDXG' FAMILY OF LIPOLYTIC ENZYMES // CARBOXYLESTERASE 8-RELATED	1482	Vu10	32111065	32112546	PF07859	PTHR23024,PTHR23024:SF113	3.1.1.1	0	GO:0016787,GO:0008152
Vung102629|c3_g1_i1	Vigun02g140500	Vigun02g140500.1	(1 of 2) PTHR11709//PTHR11709:SF26 - MULTI-COPPER OXIDASE // SUBFAMILY NOT NAMED	3550	Vu02	28935072	28938621	PF07731,PF07732,PF00394	PTHR11709,PTHR11709:SF26	1.10.3.3	0	GO:0055114,GO:0016491,GO:0005507
Vung2365|c0_g1_i2	Vigun02g031800	Vigun02g031800.1	(1 of 1) PTHR33270//PTHR33270:SF5 - FAMILY NOT NAMED // GB|AAC00605.1	1688	Vu02	13455056	13456743	0	PTHR33270,PTHR33270:SF5	0	0	0
Vung118067|c0_g1_i3	Vigun06g236000	Vigun06g236000.1	(1 of 1) 2.4.2.17 - ATP phosphoribosyltransferase / Phosphoribosyl-ATP pyrophosphorylase	4344	Vu06	34128479	34132822	PF08029,PF01634	PTHR21403,PTHR21403:SF0	2.4.2.17	K00765	GO:0005737,GO:0003879,GO:0000287,GO:0000105
Vung95415|c0_g1_i1	Vigun10g149100	Vigun10g149100.1	(1 of 3) PTHR33472//PTHR33472:SF1 - FAMILY NOT NAMED // EXTENSIN-RELATED	1005	Vu10	36753172	36754176	0	PTHR33472,PTHR33472:SF1	0	0	0
Vung41661|c0_g1_i2	Vigun02g063500	Vigun02g063500.1	(1 of 1) K15275 - solute carrier family 35 (UDP-galactose transporter), member B1 (SLC35B1)	3610	Vu02	21116576	21120185	PF08449	PTHR10778,PTHR10778:SF10	0	K15275	GO:0055085
Vung17963|c0_g2_i1	Vigun08g078100	Vigun08g078100.1	0	1008	Vu08	15473959	15474966	0	PTHR35697,PTHR35697:SF1	0	0	0
Vung15640|c1_g1_i2	Vigun02g001400	Vigun02g001400.1	0	6186	Vu02	915392	921577	0	PTHR32219,PTHR32219:SF6	0	0	0
Vung100749|c1_g2_i3	Vigun01g159300	Vigun01g159300.1	(1 of 45) PF00069//PF07714 - Protein kinase domain (Pkinase) // Protein tyrosine kinase (Pkinase_Tyr)	2187	Vu01	34102620	34104806	PF07714	PTHR27006	2.7.11.1	0	GO:0006468,GO:0004672
Vung53246|c0_g1_i1	Vigun09g184800	Vigun09g184800.1	(1 of 2) PTHR13683//PTHR13683:SF259 - ASPARTYL PROTEASES // ASPARTYL PROTEASE-LIKE PROTEIN	1311	Vu09	35827328	35828638	PF14543	PTHR13683,PTHR13683:SF259	3.4.23.12	0	GO:0006508,GO:0004190
Vung30613|c3_g2_i4	Vigun03g404200	Vigun03g404200.1	(1 of 2) PTHR13683:SF296 - ASPARTYL PROTEASE FAMILY PROTEIN	3707	Vu03	61127941	61131647	PF03489,PF05184,PF00026	PTHR13683,PTHR13683:SF296	3.4.23.40	K08245	GO:0006629,GO:0006508,GO:0004190
Vung148207|c0_g1_i1	Vigun03g214100	Vigun03g214100.1	(1 of 4) PTHR10438:SF278 - THIOREDOXIN H7-RELATED	1520	Vu03	35598196	35599715	PF00085	PTHR10438,PTHR10438:SF278	1.6.5.4	K03671	GO:0045454,GO:0015035,GO:0006662
Vung162838|c0_g1_i1	Vigun01g195300	Vigun01g195300.1	0	444	Vu01	37246963	37247406	0	PTHR33702,PTHR33702:SF5	0	0	0
Vung113069|c4_g1_i4	Vigun11g170700	Vigun11g170700.1	(1 of 2) PTHR24096:SF134 - LONG CHAIN ACYL-COA SYNTHETASE 2	6221	Vu11	37669067	37675287	PF00501	PTHR24096,PTHR24096:SF134	6.2.1.3	K01897	GO:0008152,GO:0003824
Vung1779|c0_g1_i1	Vigun07g176500	Vigun07g176500.1	(1 of 15) PF14576//PF14577 - Sieve element occlusion N-terminus (SEO_N) // Sieve element occlusion C-terminus (SEO_C)	3292	Vu07	29172781	29176072	PF14577,PF14576	PTHR33232,PTHR33232:SF5	0	0	0
Vung71565|c0_g1_i2	Vigun07g000600	Vigun07g000600.1	(1 of 12) 2.3.1.196 - Benzyl alcohol O-benzoyltransferase	2048	Vu07	63727	65774	PF02458	PTHR31642,PTHR31642:SF9	2.3.1.196	0	GO:0016747
Vung19912|c1_g1_i1	Vigun09g114400	Vigun09g114400.1	(1 of 2) PTHR13856//PTHR13856:SF81 - VHS DOMAIN CONTAINING PROTEIN FAMILY // ENTH/VHS/GAT FAMILY PROTEIN	4962	Vu09	25100126	25105087	PF03127,PF00790	PTHR13856,PTHR13856:SF81	0	0	GO:0006886,GO:0005622
Vung118820|c0_g2_i1	Vigun07g174400	Vigun07g174400.1	0	1634	Vu07	28955784	28957417	0	PTHR39110	0	0	0
Vung155239|c2_g1_i1	Vigun05g042200	Vigun05g042200.1	(1 of 10) K15015 - solute carrier family 32 (vesicular inhibitory amino acid transporter) (SLC32A, VGAT)	2034	Vu05	3402319	3404352	PF01490	PTHR22950,PTHR22950:SF280	0	K15015	0
Vung129348|c0_g1_i7	Vigun06g148500	Vigun06g148500.1	(1 of 1) 2.5.1.1//2.5.1.10 - Dimethylallyltranstransferase / Prenyltransferase // (2E,6E)-farnesyl diphosphate synthase / Geranyltranstransferase	4484	Vu06	27339308	27343791	PF00348	PTHR11525	2.5.1.10,2.5.1.1	K00787	GO:0008299
Vung160746|c3_g2_i3	Vigun07g161400	Vigun07g161400.1	(1 of 5) PTHR32278//PTHR32278:SF6 - FAMILY NOT NAMED // F-BOX PROTEIN PP2-B1-RELATED	2074	Vu07	27293521	27295594	PF00646,PF14299	PTHR32278,PTHR32278:SF6	0	0	GO:0005515
Vung9874|c6_g1_i5	Vigun02g111400	Vigun02g111400.1	(1 of 2) PTHR10572//PTHR10572:SF7 - 3-HYDROXY-3-METHYLGLUTARYL-COENZYME A REDUCTASE // 3-HYDROXY-3-METHYLGLUTARYL-COENZYME A REDUCTASE 2	3908	Vu02	26520416	26524323	PF00368	PTHR10572,PTHR10572:SF7	1.1.1.34	K00021	GO:0055114,GO:0050662,GO:0015936,GO:0004420
Vung72348|c0_g1_i3	Vigun06g035200	Vigun06g035200.1	(1 of 3) PTHR31642//PTHR31642:SF6 - FAMILY NOT NAMED // HXXXD-TYPE ACYL-TRANSFERASE-RELATED	3399	Vu06	14820697	14824095	PF02458	PTHR31642,PTHR31642:SF6	2.3.1.84	0	GO:0016747
Vung128330|c0_g1_i1	Vigun05g001400	Vigun05g001400.1	(1 of 112) K14488 - SAUR family protein (SAUR)	1417	Vu05	119245	120661	PF02519	PTHR31374,PTHR31374:SF10	0	K14488	GO:0009733
Vung87835|c5_g2_i4	Vigun06g141300	Vigun06g141300.1	(1 of 7) PTHR31388//PTHR31388:SF22 - FAMILY NOT NAMED // PEROXIDASE 22-RELATED	2554	Vu06	26689771	26692324	PF00141	PTHR31388,PTHR31388:SF22	1.11.1.7	K00430	GO:0055114,GO:0020037,GO:0006979,GO:0004601
Vung39092|c1_g1_i1	Vigun04g106700	Vigun04g106700.1	(1 of 2) PTHR12629:SF11 - NUDIX HYDROLASE 12, MITOCHONDRIAL	5856	Vu04	25673357	25679212	PF00293	PTHR12629,PTHR12629:SF11	0	K07766	GO:0016787
Vung107774|c0_g1_i5	Vigun03g129300	Vigun03g129300.5	(1 of 1) 3.6.3.36//3.6.3.39 - Taurine-transporting ATPase // Lipopolysaccharide-transporting ATPase	7366	Vu03	12527949	12535314	PF01061,PF00005	PTHR19241,PTHR19241:SF301	3.6.3.36	0	GO:0016020,GO:0016887,GO:0005524
Vung81115|c0_g2_i1	Vigun03g219800	Vigun03g219800.1	0	1643	Vu03	36563647	36565289	0	0	0	0	0
Vung92007|c1_g1_i8	Vigun08g171300	Vigun08g171300.1	(1 of 2) PTHR12506//PTHR12506:SF24 - PROTEIN PHOSPHATASE RELATED // ZINC FINGER CCCH DOMAIN-CONTAINING PROTEIN 26-RELATED	1959	Vu08	34178863	34180821	PF00642	PTHR12506,PTHR12506:SF24	0	0	GO:0046872
Vung101179|c0_g1_i2	Vigun11g173700	Vigun11g173700.1	(1 of 5) PTHR23500//PTHR23500:SF109 - FAMILY NOT NAMED // POLYOL TRANSPORTER 5	2359	Vu11	37891941	37894299	PF07690	PTHR23500,PTHR23500:SF109	0	0	GO:0055085,GO:0016021
Vung43246|c0_g1_i1	Vigun06g048200	Vigun06g048200.1	(1 of 2) PF04578//PF13968 - Protein of unknown function, DUF594 (DUF594) // Domain of unknown function (DUF4220) (DUF4220)	5100	Vu06	17248298	17253397	PF04578,PF13968	PTHR31325,PTHR31325:SF1	3.4.19.12,3.4.22.69	0	0
Vung141329|c0_g1_i1	Vigun09g065100	Vigun09g065100.1	(1 of 3) 1.1.1.54//1.3.1.102 - Allyl-alcohol dehydrogenase // 2-alkenal reductase (NADP(+)) / NADPH-dependent alkenal/one oxidoreductase	3017	Vu09	6879269	6882285	PF00107,PF16884	PTHR11695,PTHR11695:SF504	1.1.1.54,1.3.1.102	K07119	GO:0055114,GO:0016491,GO:0008270
Vung130627|c1_g1_i2	Vigun10g082000	Vigun10g082000.1	(1 of 2) K15306 - Ran-binding protein 1 (RANBP1)	3537	Vu10	23188050	23191586	PF00638	PTHR23138,PTHR23138:SF93	0	K15306	GO:0046907
Vung62457|c0_g1_i3	Vigun06g235500	Vigun06g235500.1	(1 of 1) PTHR10374//PTHR10374:SF13 - LACTOYLGLUTATHIONE LYASE GLYOXALASE I // SUBFAMILY NOT NAMED	1682	Vu06	34096261	34097942	PF12681	PTHR10374,PTHR10374:SF13	0	0	0
Vung130502|c4_g2_i2	Vigun01g198600	Vigun01g198600.1	(1 of 2) PTHR31221//PTHR31221:SF23 - FAMILY NOT NAMED // WRKY TRANSCRIPTION FACTOR 23-RELATED	1977	Vu01	37532510	37534486	PF03106	PTHR31221,PTHR31221:SF23	0	0	GO:0043565,GO:0006355,GO:0003700
Vung67797|c0_g2_i1	Vigun06g118400	Vigun06g118400.1	(1 of 1) PTHR22835//PTHR22835:SF259 - ZINC FINGER FYVE DOMAIN CONTAINING PROTEIN // SUBFAMILY NOT NAMED	1705	Vu06	24652178	24653882	PF00657	PTHR22835,PTHR22835:SF259	3.1.1.3	0	GO:0016788
Vung122047|c0_g1_i2	Vigun06g118800	Vigun06g118800.1	(1 of 6) PTHR33509:SF5 - LATE EMBRYOGENESIS ABUNDANT 3 (LEA3) FAMILY PROTEIN	1085	Vu06	24699883	24700967	PF03242	PTHR33509,PTHR33509:SF5	0	0	GO:0006950
Vung23435|c0_g1_i1	Vigun01g008100	Vigun01g008100.1	(1 of 101) 3.1.1.11 - Pectinesterase / Pectin methylesterase	992	Vu01	967088	968079	PF04043	PTHR31080,PTHR31080:SF11	3.1.1.11	0	GO:0004857
Vung136699|c3_g1_i10	Vigun06g052000	Vigun06g052000.1	(1 of 11) PTHR22835//PTHR22835:SF116 - ZINC FINGER FYVE DOMAIN CONTAINING PROTEIN // SUBFAMILY NOT NAMED	3634	Vu06	17785693	17789326	PF00657	PTHR22835,PTHR22835:SF116	3.1.1.3	0	GO:0016788
Vung15676|c0_g1_i2	Vigun02g010900	Vigun02g010900.1	(1 of 2) PTHR24096:SF134 - LONG CHAIN ACYL-COA SYNTHETASE 2	6677	Vu02	4260524	4267200	PF00501	PTHR24096,PTHR24096:SF134	6.2.1.3	K01897	GO:0008152,GO:0003824
Vung106944|c0_g1_i1	Vigun03g061800	Vigun03g061800.1	(1 of 2) PTHR10108//PTHR10108:SF926 - METHYLTRANSFERASE // SUBFAMILY NOT NAMED	5995	Vu03	5071566	5077560	PF03141	PTHR10108,PTHR10108:SF926	2.1.1.157	0	GO:0008168
Vung118396|c5_g2_i7	Vigun03g427800	Vigun03g427800.1	(1 of 3) PTHR12304:SF6 - INOSINE-URIDINE PREFERRING NUCLEOSIDE HYDROLASE FAMILY PROTEIN	8364	Vu03	63286472	63294835	PF01156	PTHR12304,PTHR12304:SF6	0	0	0
Vung111024|c0_g3_i1	Vigun06g049400	Vigun06g049400.1	(1 of 2) 3.4.22.40 - Bleomycin hydrolase / Aminopeptidase C (Lactococcus lactis)	10226	Vu06	17431689	17441914	PF12695	PTHR11731,PTHR11731:SF126	3.4.22.40	0	0
Vung21248|c4_g2_i1	Vigun03g140800	Vigun03g140800.1	(1 of 46) 1.3.3.8 - Tetrahydroberberine oxidase / THB oxidase	2031	Vu03	14048370	14050400	PF08031,PF01565	PTHR32448	1.3.3.8	0	GO:0055114,GO:0050660,GO:0016491
Vung17379|c0_g1_i1	Vigun05g014000	Vigun05g014000.1	(1 of 2) PTHR10795//PTHR10795:SF387 - PROPROTEIN CONVERTASE SUBTILISIN/KEXIN // SUBTILISIN-LIKE SERINE PROTEASE-RELATED	3002	Vu05	1105619	1108620	PF05922,PF02225,PF00082	PTHR10795,PTHR10795:SF387	3.4.21.25	0	GO:0006508,GO:0004252
Vung90194|c1_g3_i1	Vigun02g050700	Vigun02g050700.1	(1 of 5) 1.1.1.22 - UDP-glucose 6-dehydrogenase	2776	Vu02	19202716	19205491	PF00984,PF03720,PF03721	PTHR11374,PTHR11374:SF28	1.1.1.22	K00012	GO:0055114,GO:0051287,GO:0016616
Vung158139|c1_g1_i2	Vigun09g084300	Vigun09g084300.1	(1 of 24) PF08263//PF13855 - Leucine rich repeat N-terminal domain (LRRNT_2) // Leucine rich repeat (LRR_8)	1504	Vu09	10591941	10593444	PF13855,PF08263	PTHR27000,PTHR27000:SF225	0	0	GO:0005515
Vung74904|c0_g1_i1	Vigun10g191200	Vigun10g191200.1	(1 of 4) PF14360 - PAP2 superfamily C-terminal (PAP2_C)	2280	Vu10	40547918	40550197	PF14360	PTHR34674	0	0	0
Vung126470|c3_g1_i2	Vigun04g130300	Vigun04g130300.1	(1 of 3) 1.3.1.22 - 3-oxo-5-alpha-steroid 4-dehydrogenase (NADP(+)) / Cholestenone 5-alpha-reductase	2332	Vu04	32627747	32630078	PF02544	PTHR10556,PTHR10556:SF35	1.3.1.22	0	GO:0016627,GO:0016021,GO:0006629,GO:0005737
Vung156193|c0_g1_i1	Vigun05g104200	Vigun05g104200.1	(1 of 3) PTHR19139//PTHR19139:SF169 - AQUAPORIN TRANSPORTER // AQUAPORIN PIP1-4-RELATED	1918	Vu05	10404080	10405997	PF00230	PTHR19139,PTHR19139:SF169	0	K09872	GO:0016020,GO:0006810,GO:0005215
Vung114928|c0_g1_i1	Vigun03g264600	Vigun03g264600.1	(1 of 3) 2.1.1.274 - Salicylate carboxymethyltransferase / Salicylate O-methyltransferase	1958	Vu03	43384192	43386149	PF03492	PTHR31009,PTHR31009:SF6	2.1.1.274	K08241	GO:0008168
Vung117371|c0_g1_i1	Vigun01g252100	Vigun01g252100.1	(1 of 2) 3.3.1.1 - Adenosylhomocysteinase / SAHase	3669	Vu01	41826082	41829750	PF02826,PF05221	PTHR23420	3.3.1.1	K01251	GO:0055114,GO:0051287,GO:0006730,GO:0004013
Vung116791|c0_g3_i4	Vigun09g270300	Vigun09g270300.1	(1 of 1) PTHR11482:SF36 - ARGININE DECARBOXYLASE 1-RELATED	4730	Vu09	43265088	43269817	PF00278,PF02784	PTHR11482,PTHR11482:SF36	4.1.1.19	0	GO:0003824,GO:0008792,GO:0008295,GO:0006527
Vung126656|c1_g3_i1	Vigun02g132000	Vigun02g132000.1	(1 of 2) K09587 - steroid 22-alpha-hydroxylase (CYP90B1, DWF4)	4185	Vu02	28285245	28289429	PF00067	PTHR24286,PTHR24286:SF37	0	K09587	GO:0055114,GO:0020037,GO:0016705,GO:0005506
Vung148752|c1_g1_i1	Vigun04g108100	Vigun04g108100.1	(1 of 10) 1.14.13.89 - Isoflavone 2'-hydroxylase / Isoflavone 2'-monooxygenase	2081	Vu04	26297514	26299594	PF00067	PTHR24298,PTHR24298:SF61	1.14.13.89	0	GO:0055114,GO:0020037,GO:0016705,GO:0005506
Vung134708|c0_g1_i3	Vigun11g040700	Vigun11g040700.1	(1 of 10) K19042 - E3 ubiquitin-protein ligase BOI and related proteins [EC:6.3.2.19] (BOI)	1906	Vu11	5789489	5791394	PF13920	PTHR10044	6.3.2.19	K19042	0
Vung136776|c0_g1_i1	Vigun08g178200	Vigun08g178200.1	(1 of 2) PTHR31852:SF0 - LATE EMBRYOGENESIS ABUNDANT HYDROXYPROLINE-RICH GLYCOPROTEIN	1099	Vu08	34807298	34808396	PF03168	PTHR31852,PTHR31852:SF0	0	0	0
Vung19872|c0_g1_i1	Vigun03g252400	Vigun03g252400.1	(1 of 24) PF03087 - Arabidopsis protein of unknown function (DUF241)	1262	Vu03	41879220	41880481	PF03087	PTHR31509,PTHR31509:SF14	0	0	0
Vung42311|c0_g1_i9	Vigun09g145300	Vigun09g145300.2	(1 of 2) PF05631 - Sugar-tranasporters, 12 TM (MFS_5)	4168	Vu09	30843898	30848065	PF05631	PTHR23516,PTHR23516:SF4	0	0	GO:0016021,GO:0015689,GO:0015098
Vung142376|c0_g1_i7	Vigun06g238800	Vigun06g238800.1	(1 of 1) PTHR11142//PTHR11142:SF1 - PSEUDOURIDYLATE SYNTHASE // TRNA PSEUDOURIDINE SYNTHASE	3344	Vu06	34323850	34327193	PF01416	PTHR11142,PTHR11142:SF1	5.4.99.12	K06173	GO:0009982,GO:0009451,GO:0003723,GO:0001522
Vung23408|c0_g1_i1	Vigun03g136100	Vigun03g136100.3	(1 of 4) 4.1.1.22 - Histidine decarboxylase / L-histidine carboxy-lyase	3784	Vu03	13327499	13331282	PF00282	PTHR11999,PTHR11999:SF83	4.1.1.22	K01590	GO:0030170,GO:0019752,GO:0016831
Vung2461|c1_g1_i1	Vigun10g157000	Vigun10g157000.1	(1 of 2) PTHR31707//PTHR31707:SF55 - FAMILY NOT NAMED // PECTINESTERASE 2-RELATED	5185	Vu10	37648871	37654055	PF04043,PF01095	PTHR31707,PTHR31707:SF55	3.1.1.11	K01051	GO:0004857,GO:0042545,GO:0030599,GO:0005618
Vung156259|c2_g1_i4	Vigun02g189900	Vigun02g189900.1	(1 of 2) PTHR24096:SF169 - 4-COUMARATE--COA LIGASE 3	4257	Vu02	32767087	32771343	PF13193,PF00501	PTHR24096,PTHR24096:SF169	6.2.1.34,6.2.1.12	K01904	GO:0008152,GO:0003824
Vung12308|c0_g1_i1	Vigun02g115000	Vigun02g115000.1	(1 of 2) PTHR10177:SF250 - CYCLIN-B2-3-RELATED	3260	Vu02	26864110	26867369	PF02984,PF00134	PTHR10177,PTHR10177:SF250	0	K05868	GO:0005634
Vung161897|c0_g3_i3	Vigun07g236500	Vigun07g236500.3	(1 of 1) KOG0978//KOG1003 - E3 ubiquitin ligase involved in syntaxin degradation // Actin filament-coating protein tropomyosin	7534	Vu07	35789428	35796961	PF07765	PTHR32258,PTHR32258:SF6	0	0	0
Vung5375|c0_g1_i1	Vigun07g065700	Vigun07g065700.1	(1 of 21) PF00069//PF08263 - Protein kinase domain (Pkinase) // Leucine rich repeat N-terminal domain (LRRNT_2)	3103	Vu07	7695387	7698489	PF08263,PF00069	PTHR27008,PTHR27008:SF33	2.7.11.1	0	GO:0006468,GO:0005524,GO:0004672
Vung74013|c3_g1_i1	Vigun07g124400	Vigun07g124400.1	(1 of 2) PTHR30620//PTHR30620:SF4 - PERIPLASMIC BETA-GLUCOSIDASE-RELATED // BETA-D-XYLOSIDASE 2-RELATED	4452	Vu07	23048276	23052727	PF14310,PF00933,PF01915	PTHR30620,PTHR30620:SF4	3.2.1.37	0	GO:0005975,GO:0004553
Vung55857|c0_g1_i1	Vigun07g176300	Vigun07g176300.1	(1 of 15) PF14576//PF14577 - Sieve element occlusion N-terminus (SEO_N) // Sieve element occlusion C-terminus (SEO_C)	3247	Vu07	29147811	29151057	PF14577,PF14576	PTHR33232,PTHR33232:SF5	0	0	0
Vung84162|c0_g1_i1	Vigun06g210500	Vigun06g210500.1	(1 of 38) PF00954//PF01453//PF07714//PF08276 - S-locus glycoprotein domain (S_locus_glycop) // D-mannose binding lectin (B_lectin) // Protein tyrosine kinase (Pkinase_Tyr) // PAN-like domain (PAN_2)	4187	Vu06	32353476	32357662	PF08276,PF00954,PF01453,PF07714	PTHR27002,PTHR27002:SF66	2.7.11.1	0	GO:0048544,GO:0006468,GO:0004672
Vung30234|c0_g1_i14	Vigun08g184200	Vigun08g184200.1	(1 of 2) PTHR31326:SF3 - CRT (CHLOROQUINE-RESISTANCE TRANSPORTER)-LIKE TRANSPORTER 1-RELATED	3665	Vu08	35338169	35341833	PF08627	PTHR31326,PTHR31326:SF3	0	0	0
Vung8032|c1_g2_i2	Vigun04g047900	Vigun04g047900.1	(1 of 1) PTHR23070//PTHR23070:SF5 - BCS1 AAA-TYPE ATPASE // AAA-TYPE ATPASE FAMILY PROTEIN-RELATED	2003	Vu04	4133224	4135226	PF00004,PF14363	PTHR23070,PTHR23070:SF5	0	0	GO:0005524
Vung125809|c1_g1_i10	Vigun03g402000	Vigun03g402000.2	(1 of 1) PTHR13302 - CONSERVED OLIGOMERIC GOLGI COMPLEX COMPONENT 3	13647	Vu03	60910492	60924138	PF04136	PTHR13302	0	0	GO:0016020,GO:0006886,GO:0005801
Vung164066|c4_g2_i1	Vigun06g210500	Vigun06g210500.1	(1 of 38) PF00954//PF01453//PF07714//PF08276 - S-locus glycoprotein domain (S_locus_glycop) // D-mannose binding lectin (B_lectin) // Protein tyrosine kinase (Pkinase_Tyr) // PAN-like domain (PAN_2)	4187	Vu06	32353476	32357662	PF08276,PF00954,PF01453,PF07714	PTHR27002,PTHR27002:SF66	2.7.11.1	0	GO:0048544,GO:0006468,GO:0004672
Vung140451|c0_g1_i4	Vigun10g080400	Vigun10g080400.1	(1 of 5) 1.14.11.19 - Leucocyanidin oxygenase / Leucoanthocyanidin dioxygenase	2680	Vu10	22263167	22265846	PF03171,PF14226	PTHR10209,PTHR10209:SF134	1.14.11.19	0	GO:0055114,GO:0016491
Vung34819|c0_g1_i1	Vigun07g248900	Vigun07g248900.1	(1 of 2) PTHR31062:SF37 - XYLOGLUCAN ENDOTRANSGLUCOSYLASE/HYDROLASE PROTEIN 10-RELATED	1362	Vu07	36837060	36838421	PF06955,PF00722	PTHR31062,PTHR31062:SF37	2.4.1.207	K08235	GO:0048046,GO:0016762,GO:0006073,GO:0005618,GO:0005975,GO:0004553
Vung29768|c0_g2_i1	Vigun09g132300	Vigun09g132300.1	(1 of 4) PTHR31867:SF22 - EXPANSIN-A8	1526	Vu09	29079734	29081259	PF03330,PF01357	PTHR31867,PTHR31867:SF22	0	0	0
Vung34969|c0_g1_i1	Vigun05g097900	Vigun05g097900.1	(1 of 2) PTHR18968:SF137 - PYRUVATE DECARBOXYLASE 2	3165	Vu05	9530247	9533411	PF02775,PF00205,PF02776	PTHR18968,PTHR18968:SF137	4.1.1.1	K01568	GO:0030976,GO:0003824,GO:0000287
Vung150310|c0_g1_i1	Vigun07g068300	Vigun07g068300.1	0	3904	Vu07	8217181	8221084	0	PTHR33623,PTHR33623:SF5	0	0	0
Vung149823|c1_g3_i1	Vigun04g040800	Vigun04g040800.1	(1 of 3) PTHR12526//PTHR12526:SF379 - GLYCOSYLTRANSFERASE // SUCROSE SYNTHASE 5	5484	Vu04	3521087	3526570	PF00534,PF00862	PTHR12526,PTHR12526:SF379	2.4.1.13	K00695	GO:0016157,GO:0005985
Vung5|c0_g2_i1	Vigun06g185900	Vigun06g185900.1	0	327	Vu06	30526184	30526510	0	PTHR36896,PTHR36896:SF1	0	0	0
Vung75718|c1_g1_i1	Vigun02g041200	Vigun02g041200.1	(1 of 1) 3.2.1.177//3.2.1.37//3.2.1.55 - Alpha-D-xyloside xylohydrolase / Alpha-xylosidase // Xylan 1,4-beta-xylosidase / Xylobiase // Non-reducing end alpha-L-arabinofuranosidase / Arabinosidase	5083	Vu02	16858378	16863460	PF16863,PF01055	PTHR22762,PTHR22762:SF56	3.2.1.177,3.2.1.55,3.2.1.37	K15925	GO:0005975,GO:0004553
Vung123016|c0_g1_i1	Vigun10g087500	Vigun10g087500.1	(1 of 1) PTHR27008//PTHR27008:SF4 - FAMILY NOT NAMED // LEUCINE-RICH REPEAT PROTEIN KINASE FAMILY PROTEIN	4703	Vu10	25190266	25194968	PF08263,PF00069	PTHR27008,PTHR27008:SF4	2.7.11.1	0	GO:0006468,GO:0005524,GO:0004672
Vung154963|c3_g2_i8	Vigun01g147600	Vigun01g147600.2	(1 of 2) PTHR24223:SF189 - ABC TRANSPORTER C FAMILY MEMBER 5	9058	Vu01	32903791	32912848	PF00664,PF00005	PTHR24223,PTHR24223:SF189	3.6.3.44	0	GO:0055085,GO:0042626,GO:0016021,GO:0006810,GO:0005524,GO:0016887
Vung95346|c0_g1_i1	Vigun04g047800	Vigun04g047800.1	(1 of 34) PF00314 - Thaumatin family (Thaumatin)	1534	Vu04	4127555	4129088	PF00314	PTHR31048,PTHR31048:SF8	0	0	0
Vung62717|c0_g1_i1	Vigun06g210300	Vigun06g210300.1	(1 of 1) PTHR31852//PTHR31852:SF5 - FAMILY NOT NAMED // GB|AAF18257.1	1206	Vu06	32339280	32340485	PF03168	PTHR31852,PTHR31852:SF5	0	0	0
Vung123265|c2_g4_i4	Vigun05g112200	Vigun05g112200.3	(1 of 6) PTHR11260//PTHR11260:SF314 - GLUTATHIONE S-TRANSFERASE, GST, SUPERFAMILY, GST DOMAIN CONTAINING // SUBFAMILY NOT NAMED	1401	Vu05	11764685	11766085	PF00043,PF02798	PTHR11260,PTHR11260:SF314	2.5.1.18	K00799	GO:0005515
Vung105473|c2_g3_i10	Vigun04g179800	Vigun04g179800.1	(1 of 138) KOG0156 - Cytochrome P450 CYP2 subfamily	2197	Vu04	40361879	40364075	PF00067	PTHR24298,PTHR24298:SF111	0	0	GO:0055114,GO:0020037,GO:0016705,GO:0005506
Vung3620|c0_g1_i1	Vigun05g280500	Vigun05g280500.1	(1 of 2) PTHR27001//PTHR27001:SF102 - FAMILY NOT NAMED // LYSM DOMAIN RECEPTOR-LIKE KINASE 3	5065	Vu05	46983004	46988068	PF01476,PF07714	PTHR27001,PTHR27001:SF102	2.7.11.1	0	GO:0006468,GO:0004672
Vung52839|c5_g2_i1	Vigun01g199800	Vigun01g199800.1	(1 of 7) K07937//K07977 - ADP-ribosylation factor 1 (ARF1) // Arf/Sar family, other (ARF)	2300	Vu01	37627262	37629561	PF09439	PTHR11711,PTHR11711:SF181	0	K07977,K07937	0
Vung87174|c3_g2_i1	Vigun08g001900	Vigun08g001900.1	(1 of 2) PTHR11709:SF90 - MULTI-COPPER OXIDASE TYPE I FAMILY PROTEIN-RELATED	4700	Vu08	226478	231177	PF07731,PF07732,PF00394	PTHR11709,PTHR11709:SF90	1.10.3.3	0	GO:0055114,GO:0016491,GO:0005507
Vung71539|c0_g1_i2	Vigun04g051300	Vigun04g051300.1	(1 of 2) PTHR12565:SF172 - BHLH TRANSCRIPTION FACTOR PRE1-RELATED	2290	Vu04	4619336	4621625	PF00010	PTHR12565,PTHR12565:SF172	0	0	GO:0046983
Vung50616|c0_g1_i1	Vigun02g196400	Vigun02g196400.1	(1 of 54) PF02298 - Plastocyanin-like domain (Cu_bind_like)	995	Vu02	33172369	33173363	PF02298	PTHR33021,PTHR33021:SF21	0	0	GO:0009055
Vung93874|c6_g1_i5	Vigun08g200900	Vigun08g200900.1	(1 of 2) 2.7.7.69 - GDP-L-galactose phosphorylase	3359	Vu08	36529032	36532390	0	PTHR20884,PTHR20884:SF10	2.7.7.69	K14190	GO:0080048
Vung116791|c0_g3_i3	Vigun09g270300	Vigun09g270300.1	(1 of 1) PTHR11482:SF36 - ARGININE DECARBOXYLASE 1-RELATED	4730	Vu09	43265088	43269817	PF00278,PF02784	PTHR11482,PTHR11482:SF36	4.1.1.19	0	GO:0003824,GO:0008792,GO:0008295,GO:0006527
Vung55281|c1_g3_i9	Vigun07g119700	Vigun07g119700.1	(1 of 3) PTHR10366:SF465 - UDP-GLUCURONIC ACID DECARBOXYLASE 1	4184	Vu07	22211354	22215537	PF01073	PTHR10366,PTHR10366:SF465	4.1.1.35	K08678	GO:0055114,GO:0016616,GO:0006694,GO:0003854
Vung3592|c0_g1_i1	Vigun02g085800	Vigun02g085800.1	(1 of 2) PTHR27001//PTHR27001:SF105 - FAMILY NOT NAMED // PROTEIN KINASE FAMILY PROTEIN-RELATED	5042	Vu02	24021059	24026100	PF00069	PTHR27001,PTHR27001:SF105	2.7.11.1	0	GO:0006468,GO:0005524,GO:0004672
Vung101016|c4_g1_i2	Vigun05g237800	Vigun05g237800.1	(1 of 3) PTHR11011:SF25 - FATTY ACYL-COA REDUCTASE 3-RELATED	5629	Vu05	43087711	43093339	PF03015,PF07993	PTHR11011,PTHR11011:SF25	1.2.1.84	K13356	GO:0080019
Vung126452|c3_g1_i8	Vigun09g242200	Vigun09g242200.1	(1 of 138) KOG0156 - Cytochrome P450 CYP2 subfamily	2013	Vu09	41158899	41160911	PF00067	PTHR24298,PTHR24298:SF74	0	0	GO:0055114,GO:0020037,GO:0016705,GO:0005506
Vung109148|c1_g1_i3	Vigun04g092700	Vigun04g092700.1	(1 of 3) 5.3.99.6 - Allene-oxide cyclase	2379	Vu04	18052059	18054437	PF06351	PTHR31843,PTHR31843:SF2	5.3.99.6	K10525	GO:0016853,GO:0009507
Vung96563|c3_g1_i2	Vigun07g088500	Vigun07g088500.1	(1 of 3) PTHR23023:SF83 - INDOLE-3-PYRUVATE MONOOXYGENASE YUCCA5-RELATED	1986	Vu07	13734184	13736169	PF13738	PTHR23023,PTHR23023:SF83	1.14.13.168	K11816	0
Vung130443|c3_g2_i8	Vigun02g192400	Vigun02g192400.1	(1 of 11) 1.3.1.42 - 12-oxophytodienoate reductase	1940	Vu02	32936077	32938016	PF00724	PTHR22893,PTHR22893:SF44	1.3.1.42	K05894	GO:0055114,GO:0016491,GO:0010181
Vung113817|c0_g1_i1	Vigun03g222900	Vigun03g222900.2	(1 of 3) PTHR10694:SF33 - TRANSCRIPTION FACTOR JUMONJI (JMJ) FAMILY PROTEIN / ZINC FINGER (C5HC2 TYPE) FAMILY PROTEIN	12966	Vu03	37053378	37066343	PF02928,PF02375,PF02373	PTHR10694,PTHR10694:SF33	1.14.11.27	0	0
Vung148207|c0_g1_i2	Vigun03g214100	Vigun03g214100.2	(1 of 4) PTHR10438:SF278 - THIOREDOXIN H7-RELATED	1520	Vu03	35598196	35599715	PF00085	PTHR10438,PTHR10438:SF278	1.6.5.4	K03671	GO:0045454,GO:0015035,GO:0006662
Vung15640|c0_g1_i1	Vigun02g001400	Vigun02g001400.1	0	6186	Vu02	915392	921577	0	PTHR32219,PTHR32219:SF6	0	0	0
Vung145327|c2_g2_i3	Vigun03g294900	Vigun03g294900.1	(1 of 3) K01528 - dynamin GTPase (DNM)	5362	Vu03	48069007	48074368	PF02212,PF00350,PF01031	PTHR11566,PTHR11566:SF77	0	K01528	GO:0005525,GO:0003924
Vung28938|c0_g2_i2	Vigun07g163600	Vigun07g163600.1	(1 of 1) PTHR32227:SF29 - GLUCAN ENDO-1,3-BETA-GLUCOSIDASE 10-RELATED	3695	Vu07	27522035	27525729	PF00332	PTHR32227,PTHR32227:SF29	3.2.1.39	0	GO:0005975,GO:0004553
Vung39702|c0_g1_i3	Vigun08g169600	Vigun08g169600.1	(1 of 1) PTHR32295:SF15 - PROTEIN IQ-DOMAIN 33	3323	Vu08	34051185	34054507	PF00612	PTHR32295,PTHR32295:SF15	0	0	GO:0005515
Vung100378|c1_g1_i2	Vigun03g247900	Vigun03g247900.1	(1 of 2) PTHR10572//PTHR10572:SF7 - 3-HYDROXY-3-METHYLGLUTARYL-COENZYME A REDUCTASE // 3-HYDROXY-3-METHYLGLUTARYL-COENZYME A REDUCTASE 2	3969	Vu03	41219743	41223711	PF00368	PTHR10572,PTHR10572:SF7	1.1.1.34	K00021	GO:0055114,GO:0050662,GO:0015936,GO:0004420
Vung1170|c0_g1_i1	Vigun07g000700	Vigun07g000700.1	(1 of 1) PTHR23042:SF65 - TRANSCRIPTION FACTOR BHLH92	1064	Vu07	75194	76257	0	PTHR23042,PTHR23042:SF65	0	0	0
Vung90295|c2_g4_i1	VigunL084400	VigunL084400.1	0	556	contig_665	62297	62852	0	0	0	0	0
Vung39722|c0_g1_i2	Vigun03g008300	Vigun03g008300.1	(1 of 1) PTHR31029:SF4 - F5O11.6	2587	Vu03	555547	558133	0	PTHR31029,PTHR31029:SF4	0	0	0
Vung18838|c1_g1_i1	Vigun01g154400	Vigun01g154400.1	(1 of 2) PTHR21229//PTHR21229:SF26 - LUNG SEVEN TRANSMEMBRANE RECEPTOR // SUBFAMILY NOT NAMED	2854	Vu01	33706395	33709248	PF10192	PTHR21229,PTHR21229:SF26	0	0	GO:0019236,GO:0007186,GO:0016021
Vung144868|c2_g2_i3	Vigun10g044700	Vigun10g044700.1	(1 of 2) K17961 - cytochrome P450, family 82, subfamily G, polypeptide 1 (CYP82G1)	3929	Vu10	6509778	6513706	PF00067	PTHR24298,PTHR24298:SF74	0	K17961	GO:0055114,GO:0020037,GO:0016705,GO:0005506
Vung109638|c0_g1_i1	Vigun02g124000	Vigun02g124000.1	(1 of 1) 4.2.1.47 - GDP-mannose 4,6-dehydratase / Guanosine diphosphomannose oxidoreductase	2152	Vu02	27604100	27606251	PF16363	PTHR10366,PTHR10366:SF346	4.2.1.47	K01711	0
Vung115455|c0_g1_i1	Vigun07g181000	Vigun07g181000.1	0	3747	Vu07	29784955	29788701	0	PTHR35548,PTHR35548:SF1	0	0	0
Vung123016|c0_g1_i3	Vigun05g095200	Vigun05g095200.1	(1 of 1) PTHR27008//PTHR27008:SF4//PTHR27008:SF9 - FAMILY NOT NAMED // LEUCINE-RICH REPEAT PROTEIN KINASE FAMILY PROTEIN // SUBFAMILY NOT NAMED	5290	Vu05	9238584	9243873	PF08263,PF13855,PF07714	PTHR27008,PTHR27008:SF9	2.7.11.1,2.7.10.2	0	GO:0005515,GO:0006468,GO:0004672
Vung54313|c0_g1_i2	Vigun11g210400	Vigun11g210400.1	(1 of 2) PTHR22953:SF18 - METALLOPHOSPHOESTERASE DOMAIN-CONTAINING PROTEIN	9095	Vu11	40568840	40577934	PF14008,PF16656,PF00149	PTHR22953,PTHR22953:SF18	3.1.4.1	0	GO:0016787
Vung50840|c0_g1_i4	Vigun03g098500	Vigun03g098500.1	(1 of 4) PTHR12411:SF371 - CATHEPSIN O	1912	Vu03	8398322	8400233	PF08246,PF00112	PTHR12411,PTHR12411:SF371	3.4.22.14	0	GO:0008234,GO:0006508
Vung138186|c0_g1_i1	Vigun01g001200	Vigun01g001200.1	(1 of 1) PTHR22835//PTHR22835:SF207 - ZINC FINGER FYVE DOMAIN CONTAINING PROTEIN // SUBFAMILY NOT NAMED	2059	Vu01	230234	232292	PF00657	PTHR22835,PTHR22835:SF207	3.1.1.3	0	GO:0016788
Vung160298|c0_g2_i14	Vigun10g129000	Vigun10g129000.1	(1 of 2) K01068 - acyl-coenzyme A thioesterase 1/2/4 (ACOT1_2_4)	7842	Vu10	33684807	33692648	PF00027,PF02551	PTHR11066,PTHR11066:SF34	3.1.2.2	K01068	GO:0047617,GO:0006637
Vung129532|c0_g1_i8	Vigun02g005400	Vigun02g005400.1	(1 of 1) PTHR24286:SF86 - ABSCISIC ACID 8'-HYDROXYLASE 2	7151	Vu02	2523479	2530629	PF00067	PTHR24286,PTHR24286:SF86	1.14.13.93	0	GO:0055114,GO:0020037,GO:0016705,GO:0005506
Vung4266|c0_g1_i1	Vigun03g290800	Vigun03g290800.1	0	3441	Vu03	47400256	47403696	0	PTHR33700,PTHR33700:SF1	0	0	0
Vung22040|c3_g1_i1	Vigun04g173800	Vigun04g173800.2	(1 of 11) PF05623 - Protein of unknown function (DUF789) (DUF789)	5997	Vu04	39817065	39823061	PF05623	PTHR31343,PTHR31343:SF7	0	0	0
Vung45150|c0_g2_i1	Vigun06g066700	Vigun06g066700.3	(1 of 13) K10406 - kinesin family member C2/C3 (KIFC2_3)	10972	Vu06	19501174	19512145	PF00225	PTHR24115,PTHR24115:SF512	3.6.4.5	K10406	GO:0008017,GO:0007018,GO:0005524,GO:0003777,GO:0005871
Vung163265|c0_g1_i1	Vigun07g115400	Vigun07g115400.1	(1 of 6) PF00620//PF00786 - RhoGAP domain (RhoGAP) // P21-Rho-binding domain (PBD)	3398	Vu07	21335986	21339383	PF00786,PF00620	PTHR23177	0	0	GO:0007165
Vung53776|c2_g2_i1	Vigun04g052200	Vigun04g052200.1	(1 of 2) PTHR10641//PTHR10641:SF530 - MYB-LIKE DNA-BINDING PROTEIN MYB // SUBFAMILY NOT NAMED	1833	Vu04	4764344	4766176	PF00249	PTHR10641,PTHR10641:SF530	0	K09422	0
Vung94973|c0_g1_i2	Vigun08g200700	Vigun08g200700.1	(1 of 1) PTHR12701//PTHR12701:SF16 - BCR-ASSOCIATED PROTEIN, BAP // SUBFAMILY NOT NAMED	1521	Vu08	36524812	36526332	0	PTHR12701,PTHR12701:SF16	0	K14009	GO:0016021,GO:0006886,GO:0005783
Vung59787|c1_g1_i4	Vigun05g255500	Vigun05g255500.1	(1 of 1) PTHR19139//PTHR19139:SF55 - AQUAPORIN TRANSPORTER // SUBFAMILY NOT NAMED	1292	Vu05	44974247	44975538	PF00230	PTHR19139,PTHR19139:SF55	0	K09873	GO:0016020,GO:0006810,GO:0005215
Vung38542|c0_g2_i1	Vigun09g012200	Vigun09g012200.1	0	1285	Vu09	906842	908126	0	PTHR35488,PTHR35488:SF2	0	0	0
Vung158871|c0_g2_i1	Vigun10g088300	Vigun10g088300.1	(1 of 1) PTHR27008//PTHR27008:SF3 - FAMILY NOT NAMED // PROBABLY INACTIVE LEUCINE-RICH REPEAT RECEPTOR-LIKE PROTEIN KINASE IMK2	3643	Vu10	25405947	25409589	PF00560,PF08263,PF13855,PF07714	PTHR27008,PTHR27008:SF3	2.7.11.1	0	GO:0005515,GO:0006468,GO:0004672
Vung118341|c0_g3_i9	Vigun02g132300	Vigun02g132300.1	(1 of 2) PTHR14255//PTHR14255:SF11 - ATP-DEPENDENT PROTEASE CEREBLON // SUBFAMILY NOT NAMED	3628	Vu02	28318976	28322603	PF01925	PTHR14255,PTHR14255:SF11	0	0	GO:0016021
Vung19621|c0_g2_i1	Vigun09g116300	Vigun09g116300.1	(1 of 1) KOG4477 - RING1 interactor RYBP and related Zn-finger-containing proteins	5803	Vu09	25440947	25446749	PF03141	PTHR10108,PTHR10108:SF926	3.4.19.12,3.4.22.69	0	GO:0008168
Vung59187|c1_g2_i1	Vigun05g251500	Vigun05g251500.1	(1 of 9) PTHR31992:SF8 - DOF ZINC FINGER PROTEIN DOF1.1-RELATED	1943	Vu05	44564338	44566280	PF02701	PTHR31992,PTHR31992:SF8	0	0	GO:0006355,GO:0003677
Vung150375|c4_g2_i1	Vigun08g098500	Vigun08g098500.1	(1 of 8) PTHR31657//PTHR31657:SF9 - FAMILY NOT NAMED // ETHYLENE-RESPONSIVE TRANSCRIPTION FACTOR CRF5-RELATED	1885	Vu08	23887727	23889611	PF00847	PTHR31657,PTHR31657:SF9	0	K09286	GO:0006355,GO:0003700
Vung163177|c0_g1_i2	Vigun03g233200	Vigun03g233200.1	(1 of 40) PF03080 - Domain of unknown function (DUF239) (DUF239)	3056	Vu03	38826987	38830042	PF14365,PF03080	PTHR31589,PTHR31589:SF3	0	0	0
Vung29363|c0_g1_i1	Vigun10g008500	Vigun10g008500.1	(1 of 9) PTHR31190//PTHR31190:SF21 - FAMILY NOT NAMED // ETHYLENE-RESPONSIVE TRANSCRIPTION FACTOR 13	501	Vu10	802623	803123	PF00847	PTHR31190,PTHR31190:SF21	0	0	GO:0006355,GO:0003700
Vung21263|c0_g3_i7	Vigun09g049400	Vigun09g049400.1	(1 of 1) K10950 - ERO1-like protein alpha (ERO1L)	4635	Vu09	4858255	4862889	PF04137	PTHR12613,PTHR12613:SF0	0	K10950	GO:0055114,GO:0016671,GO:0005783,GO:0003756
Vung23124|c1_g1_i5	Vigun03g302100	Vigun03g302100.1	(1 of 14) PF04784 - Protein of unknown function, DUF547 (DUF547)	2865	Vu03	49151273	49154137	PF04784	PTHR23054,PTHR23054:SF26	0	0	0
Vung98471|c4_g1_i12	Vigun03g134800	Vigun03g134800.1	(1 of 2) PF07386 - Protein of unknown function (DUF1499) (DUF1499)	3556	Vu03	13209327	13212882	PF07386	PTHR34801,PTHR34801:SF1	0	0	0
Vung159976|c0_g1_i7	Vigun03g145600	Vigun03g145600.1	(1 of 1) K13420 - LRR receptor-like serine/threonine-protein kinase FLS2 (FLS2)	4856	Vu03	14843275	14848130	PF00560,PF08263,PF00069,PF13855	PTHR27000,PTHR27000:SF16	2.7.11.1	K13420	GO:0005515,GO:0006468,GO:0005524,GO:0004672
Vung20355|c0_g1_i1	Vigun02g001400	Vigun02g001400.1	0	6186	Vu02	915392	921577	0	PTHR32219,PTHR32219:SF6	0	0	0
Vung105628|c0_g1_i1	Vigun04g153700	Vigun04g153700.1	(1 of 3) PTHR24282//PTHR24282:SF15 - CYTOCHROME P450 FAMILY MEMBER // CYTOCHROME P450, FAMILY 715, SUBFAMILY A, POLYPEPTIDE 1	3785	Vu04	37144209	37147993	PF00067	PTHR24282,PTHR24282:SF15	0	0	GO:0055114,GO:0020037,GO:0016705,GO:0005506
Vung134737|c1_g1_i1	Vigun05g014000	Vigun05g014000.1	(1 of 2) PTHR10795//PTHR10795:SF387 - PROPROTEIN CONVERTASE SUBTILISIN/KEXIN // SUBTILISIN-LIKE SERINE PROTEASE-RELATED	3002	Vu05	1105619	1108620	PF05922,PF02225,PF00082	PTHR10795,PTHR10795:SF387	3.4.21.25	0	GO:0006508,GO:0004252
Vung74669|c0_g1_i1	Vigun08g004600	Vigun08g004600.1	(1 of 4) PTHR22835//PTHR22835:SF227 - ZINC FINGER FYVE DOMAIN CONTAINING PROTEIN // SUBFAMILY NOT NAMED	5252	Vu08	393989	399240	PF00657	PTHR22835,PTHR22835:SF227	3.1.1.3	0	GO:0016788
Vung9108|c3_g2_i1	Vigun03g406700	Vigun03g406700.1	(1 of 10) PTHR24221//PTHR24221:SF205 - FAMILY NOT NAMED // ABC TRANSPORTER B FAMILY MEMBER 11-RELATED	5884	Vu03	61385923	61391806	PF00005,PF00664	PTHR24221,PTHR24221:SF205	3.6.3.44	K05658	GO:0016887,GO:0005524,GO:0055085,GO:0042626,GO:0016021,GO:0006810
Vung102370|c0_g1_i1	Vigun06g154000	Vigun06g154000.1	(1 of 3) PTHR23130//PTHR23130:SF80 - FAMILY NOT NAMED // AUXIN-INDUCED IN ROOT CULTURES PROTEIN 12	2261	Vu06	27802873	27805133	PF03188,PF04526	PTHR23130,PTHR23130:SF80	0	0	GO:0016021
Vung127984|c0_g1_i4	Vigun06g214600	Vigun06g214600.1	(1 of 1) PTHR10286:SF3 - INORGANIC PYROPHOSPHATASE	3250	Vu06	32595329	32598578	PF00719	PTHR10286,PTHR10286:SF3	3.6.1.1	K01507	GO:0006796,GO:0005737,GO:0004427,GO:0000287
Vung50230|c1_g3_i2	Vigun04g075400	Vigun04g075400.1	(1 of 2) PTHR12266//PTHR12266:SF2 - NA+/CA2+ K+ INDEPENDENT EXCHANGER // CATION/CALCIUM EXCHANGER 1	2043	Vu04	9262958	9265000	PF01699	PTHR12266,PTHR12266:SF2	0	K13754	GO:0055085,GO:0016021
Vung119968|c0_g1_i1	Vigun05g093500	Vigun05g093500.1	(1 of 2) PTHR23324//PTHR23324:SF57 - SEC14 RELATED PROTEIN // PATELLIN-6	2990	Vu05	9052011	9055000	PF03765,PF00650	PTHR23324,PTHR23324:SF57	0	0	0
Vung24296|c0_g1_i1	Vigun07g024000	Vigun07g024000.2	(1 of 2) PTHR32285//PTHR32285:SF22 - FAMILY NOT NAMED // PROTEIN TRICHOME BIREFRINGENCE-RELATED	3504	Vu07	2124118	2127621	PF14416,PF13839	PTHR32285,PTHR32285:SF22	0	0	0
Vung24812|c0_g1_i1	Vigun07g168500	Vigun07g168500.1	(1 of 50) PF00069//PF08263//PF13855 - Protein kinase domain (Pkinase) // Leucine rich repeat N-terminal domain (LRRNT_2) // Leucine rich repeat (LRR_8)	3386	Vu07	28227014	28230399	PF08263,PF13855,PF00069	PTHR27008,PTHR27008:SF29	2.7.11.1	0	GO:0005515,GO:0006468,GO:0005524,GO:0004672
Vung120278|c0_g1_i1	Vigun07g138100	Vigun07g138100.1	(1 of 22) PF04398 - Protein of unknown function, DUF538 (DUF538)	983	Vu07	24792392	24793374	PF04398	PTHR31676,PTHR31676:SF10	0	0	0
Vung164960|c3_g1_i4	Vigun10g118000	Vigun10g118000.1	(1 of 2) PTHR24115:SF464 - KINESIN-1-RELATED	5484	Vu10	32424589	32430072	PF00225	PTHR24115,PTHR24115:SF464	3.6.4.5	K10405	GO:0008017,GO:0007018,GO:0005524,GO:0003777,GO:0005871
Vung22372|c0_g1_i2	Vigun03g144800	Vigun03g144800.1	(1 of 1) PTHR31221//PTHR31221:SF19 - FAMILY NOT NAMED // WRKY TRANSCRIPTION FACTOR 28-RELATED	2584	Vu03	14747504	14750087	PF03106	PTHR31221,PTHR31221:SF19	0	0	GO:0043565,GO:0006355,GO:0003700
Vung103528|c0_g1_i1	Vigun10g130700	Vigun10g130700.1	(1 of 1) PTHR15486:SF27 - GLYCEROL-3-PHOSPHATE 2-O-ACYLTRANSFERASE 4-RELATED	4078	Vu10	33900442	33904519	PF12710,PF01553	PTHR15486,PTHR15486:SF27	2.3.1.15	K13508	GO:0016746,GO:0008152
Vung152310|c0_g1_i1	Vigun06g085500	Vigun06g085500.1	(1 of 4) PTHR33057:SF22 - OVATE FAMILY PROTEIN 1-RELATED	1605	Vu06	21767009	21768613	PF04844	PTHR33057,PTHR33057:SF22	0	0	0
Vung134798|c0_g1_i1	Vigun05g212800	Vigun05g212800.1	(1 of 3) PTHR35274//PTHR35274:SF2 - FAMILY NOT NAMED // EXPRESSED PROTEIN-RELATED	1502	Vu05	40371577	40373078	0	PTHR35274,PTHR35274:SF2	3.4.19.12,3.4.22.69	0	0
Vung147296|c0_g1_i2	Vigun11g100700	Vigun11g100700.2	(1 of 1) PTHR13832//PTHR13832:SF372 - PROTEIN PHOSPHATASE 2C // PROTEIN PHOSPHATASE 2C 20-RELATED	2668	Vu11	29520036	29522703	PF00481	PTHR13832,PTHR13832:SF372	3.1.3.16	K17506	GO:0003824,GO:0006470,GO:0004722
Vung93204|c2_g1_i2	Vigun11g150800	Vigun11g150800.1	(1 of 2) PTHR12542//PTHR12542:SF17 - EXOCYST COMPLEX PROTEIN EXO70 // SUBFAMILY NOT NAMED	2192	Vu11	36130656	36132847	PF03081	PTHR12542,PTHR12542:SF17	0	K07195	GO:0006887,GO:0000145
Vung139138|c0_g1_i8	Vigun09g117900	Vigun09g117900.2	(1 of 1) PTHR11785//PTHR11785:SF370 - AMINO ACID TRANSPORTER // SUBFAMILY NOT NAMED	3586	Vu09	25981828	25985413	PF00324	PTHR11785,PTHR11785:SF370	0	0	GO:0055085,GO:0016020,GO:0006810,GO:0015171,GO:0003333
Vung103528|c0_g2_i1	Vigun10g130700	Vigun10g130700.1	(1 of 1) PTHR15486:SF27 - GLYCEROL-3-PHOSPHATE 2-O-ACYLTRANSFERASE 4-RELATED	4078	Vu10	33900442	33904519	PF12710,PF01553	PTHR15486,PTHR15486:SF27	2.3.1.15	K13508	GO:0016746,GO:0008152
Vung15699|c4_g4_i1	Vigun01g057800	Vigun01g057800.1	(1 of 7) 3.2.2.20 - DNA-3-methyladenine glycosylase I / DNA-3-methyladenine glycosidase I	2738	Vu01	11612514	11615251	PF03352	PTHR31116,PTHR31116:SF6	3.2.2.20	K01246	GO:0008725,GO:0006284
Vung118396|c5_g2_i15	Vigun03g427800	Vigun03g427800.1	(1 of 3) PTHR12304:SF6 - INOSINE-URIDINE PREFERRING NUCLEOSIDE HYDROLASE FAMILY PROTEIN	8364	Vu03	63286472	63294835	PF01156	PTHR12304,PTHR12304:SF6	0	0	0
Vung14084|c0_g1_i1	Vigun05g285700	Vigun05g285700.3	(1 of 2) KOG2027 - Spindle pole body protein	3267	Vu05	47330228	47333494	PF03398	PTHR12161,PTHR12161:SF14	0	0	0
Vung168221|c0_g1_i2	Vigun06g192900	Vigun06g192900.1	(1 of 4) PTHR22835//PTHR22835:SF211 - ZINC FINGER FYVE DOMAIN CONTAINING PROTEIN // SUBFAMILY NOT NAMED	2145	Vu06	30981321	30983465	PF00657	PTHR22835,PTHR22835:SF211	3.1.1.49	0	GO:0016788
Vung31695|c3_g1_i9	Vigun10g171000	Vigun10g171000.2	(1 of 2) PTHR24092//PTHR24092:SF55 - FAMILY NOT NAMED // PHOSPHOLIPID-TRANSPORTING ATPASE TAT-1	7522	Vu10	38982631	38990152	PF12710,PF16209,PF16212	PTHR24092,PTHR24092:SF55	3.6.3.1	K01530	GO:0016021,GO:0015914,GO:0005524,GO:0004012,GO:0000287
Vung87835|c5_g2_i1	Vigun06g141300	Vigun06g141300.1	(1 of 7) PTHR31388//PTHR31388:SF22 - FAMILY NOT NAMED // PEROXIDASE 22-RELATED	2554	Vu06	26689771	26692324	PF00141	PTHR31388,PTHR31388:SF22	1.11.1.7	K00430	GO:0055114,GO:0020037,GO:0006979,GO:0004601
Vung24021|c2_g2_i1	Vigun09g176400	Vigun09g176400.1	(1 of 3) PTHR14791 - BOMB/KIRA PROTEINS	1341	Vu09	34829259	34830599	0	PTHR14791	0	0	0
Vung143642|c1_g1_i1	Vigun08g194700	Vigun08g194700.2	(1 of 2) PTHR32116//PTHR32116:SF30 - FAMILY NOT NAMED // GALACTURONOSYLTRANSFERASE 15-RELATED	5124	Vu08	36101147	36106270	PF01501	PTHR32116,PTHR32116:SF30	2.4.1.43	0	GO:0016757,GO:0047262
Vung155562|c4_g2_i1	Vigun05g013700	Vigun05g013700.1	(1 of 5) PTHR19375:SF232 - MEDIATOR OF RNA POLYMERASE II TRANSCRIPTION SUBUNIT 37E-RELATED	3110	Vu05	1076636	1079745	PF00012	PTHR19375,PTHR19375:SF232	0	K03283	0
Vung16125|c1_g1_i1	Vigun02g130200	Vigun02g130200.1	(1 of 2) PTHR11709:SF116 - LACCASE-11	2629	Vu02	28133421	28136049	PF07731,PF07732,PF00394	PTHR11709,PTHR11709:SF116	1.10.3.2	K05909	GO:0055114,GO:0016491,GO:0005507
Vung119928|c1_g4_i1	Vigun03g133100	Vigun03g133100.1	(1 of 2) PTHR33044//PTHR33044:SF27 - FAMILY NOT NAMED // BIFUNCTIONAL INHIBITOR/LIPID-TRANSFER PROTEIN/SEED STORAGE 2S ALBUMIN SUPERFAMILY PROTEIN-RELATED	2546	Vu03	13046787	13049332	PF14368	PTHR33044,PTHR33044:SF27	0	0	0
Vung8979|c3_g1_i8	Vigun03g408800	Vigun03g408800.1	(1 of 9) K00789 - S-adenosylmethionine synthetase (metK)	2356	Vu03	61579616	61581971	PF00438,PF02772,PF02773	PTHR11964,PTHR11964:SF16	2.5.1.6	K00789	GO:0006556,GO:0004478,GO:0005524
Vung139510|c5_g1_i7	Vigun05g095800	Vigun05g095800.1	(1 of 3) PTHR32285:SF11 - PROTEIN TRICHOME BIREFRINGENCE-LIKE 34	2759	Vu05	9284363	9287121	PF14416,PF13839	PTHR32285,PTHR32285:SF11	0	0	0
Vung141934|c0_g1_i4	Vigun03g390800	Vigun03g390800.1	(1 of 1298) 2.7.11.1 - Non-specific serine/threonine protein kinase / Threonine-specific protein kinase	3311	Vu03	59704244	59707554	PF07714	PTHR27006,PTHR27006:SF21	2.7.11.1	0	GO:0006468,GO:0004672
Vung158065|c2_g4_i1	Vigun09g239200	Vigun09g239200.1	(1 of 2) PTHR13832//PTHR13832:SF25 - PROTEIN PHOSPHATASE 2C // PROTEIN PHOSPHATASE 2C 12-RELATED	5616	Vu09	40957176	40962791	PF00481	PTHR13832,PTHR13832:SF25	3.1.3.16	0	GO:0003824,GO:0006470,GO:0004722
Vung135479|c1_g2_i5	Vigun03g312800	Vigun03g312800.1	(1 of 1) 3.5.4.12 - dCMP deaminase / Deoxycytidylate deaminase	3824	Vu03	50574989	50578812	PF00383	PTHR11086,PTHR11086:SF18	3.5.4.12	K01493	GO:0008270
Vung128609|c0_g1_i4	Vigun05g067900	Vigun05g067900.1	(1 of 7) PF00228 - Bowman-Birk serine protease inhibitor family (Bowman-Birk_leg)	582	Vu05	5862163	5862744	PF00228	PTHR33479,PTHR33479:SF1	0	0	GO:0005576,GO:0004867
Vung148085|c0_g3_i5	Vigun03g275000	Vigun03g275000.1	(1 of 3) PTHR24349//PTHR24349:SF115 - SERINE/THREONINE-PROTEIN KINASE // SUBFAMILY NOT NAMED	4029	Vu03	45070755	45074783	PF06293	PTHR24349,PTHR24349:SF115	2.7.11.1	0	GO:0016773,GO:0016020,GO:0005524
Vung81306|c3_g1_i3	Vigun01g164900	Vigun01g164900.1	(1 of 13) K13496 - UDP-glucosyl transferase 73C [EC:2.4.1.-] Glc - brassinosteroid (UGT73C)	1881	Vu01	34718344	34720224	PF00201	PTHR11926,PTHR11926:SF248	0	K13496	GO:0016758,GO:0008152
Vung41795|c1_g1_i1	Vigun01g114800	Vigun01g114800.1	(1 of 2) PTHR34960:SF1 - EMB|CAB68146.1	2592	Vu01	29098166	29100757	0	PTHR34960,PTHR34960:SF1	0	0	0
Vung6108|c0_g1_i1	Vigun09g159900	Vigun09g159900.1	0	1197	Vu09	32708758	32709954	0	0	0	0	0
Vung153485|c0_g1_i1	Vigun11g100700	Vigun11g100700.2	(1 of 1) PTHR13832//PTHR13832:SF372 - PROTEIN PHOSPHATASE 2C // PROTEIN PHOSPHATASE 2C 20-RELATED	2668	Vu11	29520036	29522703	PF00481	PTHR13832,PTHR13832:SF372	3.1.3.16	K17506	GO:0003824,GO:0006470,GO:0004722
Vung104221|c4_g2_i6	Vigun01g162000	Vigun01g162000.1	(1 of 2) PTHR24221//PTHR24221:SF119 - FAMILY NOT NAMED // ABC TRANSPORTER B FAMILY MEMBER 1	5579	Vu01	34373782	34379360	PF00005,PF00664	PTHR24221,PTHR24221:SF119	3.6.3.44	K05658	GO:0016887,GO:0005524,GO:0055085,GO:0042626,GO:0016021,GO:0006810
Vung158690|c0_g1_i2	Vigun07g243200	Vigun07g243200.1	(1 of 14) PF11250 - Fantastic Four meristem regulator (FAF)	1660	Vu07	36448495	36450154	PF11250	PTHR33155,PTHR33155:SF8	0	0	0
Vung146491|c0_g1_i6	Vigun05g019100	Vigun05g019100.1	(1 of 1) PTHR11732//PTHR11732:SF226 - ALDO/KETO REDUCTASE // SUBFAMILY NOT NAMED	2016	Vu05	1564460	1566475	PF00248	PTHR11732,PTHR11732:SF226	1.1.1.317	0	0
Vung29656|c0_g1_i1	Vigun10g113200	Vigun10g113200.1	(1 of 1) PTHR31529//PTHR31529:SF7 - FAMILY NOT NAMED // LOB DOMAIN-CONTAINING PROTEIN 19-RELATED	3826	Vu10	31473186	31477011	PF03195	PTHR31529,PTHR31529:SF7	0	0	0
Vung50840|c0_g1_i2	Vigun03g098500	Vigun03g098500.1	(1 of 4) PTHR12411:SF371 - CATHEPSIN O	1912	Vu03	8398322	8400233	PF08246,PF00112	PTHR12411,PTHR12411:SF371	3.4.22.14	0	GO:0008234,GO:0006508
Vung145761|c0_g1_i1	Vigun09g140900	Vigun09g140900.1	0	589	Vu09	30289605	30290193	0	PTHR33641,PTHR33641:SF4	0	0	0
Vung88024|c1_g2_i11	Vigun05g008900	Vigun05g008900.4	(1 of 1) KOG0211 - Protein phosphatase 2A regulatory subunit A and related proteins	9869	Vu05	741940	751808	0	PTHR32059,PTHR32059:SF0	0	0	0
Vung148277|c0_g1_i1	Vigun03g210900	Vigun03g210900.1	(1 of 3) PTHR12565//PTHR12565:SF148 - STEROL REGULATORY ELEMENT-BINDING PROTEIN // PROTEIN BANQUO 3	1637	Vu03	34826086	34827722	PF00010	PTHR12565,PTHR12565:SF148	0	0	GO:0046983
Vung58071|c1_g1_i1	Vigun07g121600	Vigun07g121600.1	(1 of 2) PTHR31707:SF25 - PECTINESTERASE/PECTINESTERASE INHIBITOR 39-RELATED	3764	Vu07	22418939	22422702	PF04043,PF01095	PTHR31707,PTHR31707:SF25	3.1.1.11	K01051	GO:0004857,GO:0042545,GO:0030599,GO:0005618
Vung135640|c2_g1_i5	Vigun09g063300	Vigun09g063300.3	(1 of 2) PTHR22891//PTHR22891:SF25 - EUKARYOTIC TRANSLATION INITIATION FACTOR 2C // SUBFAMILY NOT NAMED	13401	Vu09	6634308	6647708	PF16487,PF16488,PF08699,PF16486,PF02170,PF02171	PTHR22891,PTHR22891:SF25	0	K11593	GO:0005515,GO:0003676
Vung116400|c2_g4_i1	Vigun07g044400	Vigun07g044400.1	(1 of 2) PTHR32285:SF52 - PROTEIN TRICHOME BIREFRINGENCE-LIKE 36	2980	Vu07	4497369	4500348	PF14416,PF13839	PTHR32285,PTHR32285:SF52	0	0	0
Vung39084|c0_g1_i1	Vigun07g262000	Vigun07g262000.1	(1 of 39) PF14009 - Domain of unknown function (DUF4228) (DUF4228)	1246	Vu07	37800641	37801886	PF14009	PTHR33052,PTHR33052:SF23	0	0	0
Vung62763|c0_g1_i1	Vigun03g116000	Vigun03g116000.1	(1 of 2) PTHR23315:SF56 - ARMADILLO/BETA-CATENIN-LIKE REPEAT-CONTAINING PROTEIN	2837	Vu03	10673702	10676538	0	PTHR23315,PTHR23315:SF56	0	0	0
Vung154364|c3_g1_i1	Vigun08g175600	Vigun08g175600.1	(1 of 1) PTHR13018:SF46 - ERD (EARLY-RESPONSIVE TO DEHYDRATION STRESS) FAMILY PROTEIN-RELATED	6490	Vu08	34584633	34591122	PF14703,PF13967,PF02714	PTHR13018,PTHR13018:SF46	0	0	GO:0016020
Vung26347|c0_g1_i1	Vigun07g127500	Vigun07g127500.1	(1 of 4) PTHR15486:SF18 - GLYCEROL-3-PHOSPHATE ACYLTRANSFERASE 2-RELATED	2760	Vu07	23476224	23478983	PF01553	PTHR15486,PTHR15486:SF18	2.3.1.15	K13508	GO:0016746,GO:0008152
Vung118396|c5_g2_i5	Vigun03g427800	Vigun03g427800.1	(1 of 3) PTHR12304:SF6 - INOSINE-URIDINE PREFERRING NUCLEOSIDE HYDROLASE FAMILY PROTEIN	8364	Vu03	63286472	63294835	PF01156	PTHR12304,PTHR12304:SF6	0	0	0
Vung108235|c0_g1_i1	Vigun07g014700	Vigun07g014700.1	(1 of 2) PTHR22849:SF38 - E3 UBIQUITIN-PROTEIN LIGASE PUB22-RELATED	2028	Vu07	1359321	1361348	PF04564	PTHR22849,PTHR22849:SF38	6.3.2.19	0	GO:0016567,GO:0004842
Vung124834|c4_g6_i10	Vigun10g186800	Vigun10g186800.1	(1 of 13) PTHR19241//PTHR19241:SF219 - ATP-BINDING CASSETTE TRANSPORTER // ABC TRANSPORTER G FAMILY MEMBER 38	7101	Vu10	40295987	40303087	PF14510,PF08370,PF00005,PF01061	PTHR19241,PTHR19241:SF219	0	0	GO:0016887,GO:0005524,GO:0016020
Vung147348|c2_g1_i1	Vigun06g219100	Vigun06g219100.1	(1 of 4) PTHR24078:SF259 - CHAPERONE DNAJ-DOMAIN CONTAINING PROTEIN	2006	Vu06	32961569	32963574	PF00226	PTHR24078,PTHR24078:SF259	0	0	0
Vung150138|c2_g1_i5	Vigun05g253500	Vigun05g253500.1	(1 of 6) PTHR11177//PTHR11177:SF190 - CHITINASE // SUBFAMILY NOT NAMED	1196	Vu05	44812919	44814114	PF00704	PTHR11177,PTHR11177:SF190	3.2.1.14	0	GO:0005975,GO:0004553
Vung161469|c3_g1_i4	Vigun07g262600	Vigun07g262600.1	(1 of 2) PTHR19370//PTHR19370:SF123 - NADH-CYTOCHROME B5 REDUCTASE // F9L1.8 PROTEIN	3320	Vu07	37842737	37846056	PF00175	PTHR19370,PTHR19370:SF123	0	0	GO:0055114,GO:0016491
Vung98172|c0_g1_i1	Vigun07g024000	Vigun07g024000.2	(1 of 2) PTHR32285//PTHR32285:SF22 - FAMILY NOT NAMED // PROTEIN TRICHOME BIREFRINGENCE-RELATED	3504	Vu07	2124118	2127621	PF14416,PF13839	PTHR32285,PTHR32285:SF22	0	0	0
Vung93621|c0_g1_i2	Vigun04g089400	Vigun04g089400.2	(1 of 3) PTHR10857:SF28 - E3 UBIQUITIN-PROTEIN LIGASE RGLG1-RELATED	4730	Vu04	15858390	15863119	PF13920,PF07002	PTHR10857,PTHR10857:SF28	0	K16280	0
Vung84466|c0_g1_i3	Vigun06g211800	Vigun06g211800.1	(1 of 5) 4.2.3.48 - (3S,6E)-nerolidol synthase / Nerolidol synthase	3547	Vu06	32429583	32433129	PF01397,PF03936	PTHR31225,PTHR31225:SF0	4.2.3.48	K15086	GO:0016829,GO:0010333,GO:0008152,GO:0000287
Vung134567|c1_g1_i9	Vigun03g389800	Vigun03g389800.1	(1 of 21) K04730 - interleukin-1 receptor-associated kinase 1 (IRAK1)	2847	Vu03	59630142	59632988	PF00069	PTHR27001,PTHR27001:SF222	2.7.11.1,2.7.10.2	K04730	GO:0006468,GO:0005524,GO:0004672
Vung80292|c0_g1_i1	Vigun03g049100	Vigun03g049100.1	(1 of 1) PTHR24322:SF419 - 11-BETA-HYDROXYSTEROID DEHYDROGENASE-LIKE 6	3190	Vu03	3941107	3944296	PF13561	PTHR24322,PTHR24322:SF419	1.1.1.146	0	0
Vung78663|c0_g1_i1	Vigun10g106700	Vigun10g106700.1	(1 of 4) PTHR31374//PTHR31374:SF56 - FAMILY NOT NAMED // AUXIN-REGULATED PROTEIN-RELATED	1075	Vu10	30541326	30542400	PF02519	PTHR31374,PTHR31374:SF56	0	K14488	GO:0009733
Vung69995|c3_g2_i3	Vigun04g156100	Vigun04g156100.1	(1 of 2) PTHR22814//PTHR22814:SF140 - COPPER TRANSPORT PROTEIN ATOX1-RELATED // HEAVY METAL TRANSPORT/DETOXIFICATION SUPERFAMILY PROTEIN	2716	Vu04	37775535	37778250	PF00403	PTHR22814,PTHR22814:SF140	0	0	GO:0046872,GO:0030001
Vung41065|c0_g1_i1	Vigun10g090800	Vigun10g090800.1	(1 of 2) PTHR23324//PTHR23324:SF57 - SEC14 RELATED PROTEIN // PATELLIN-6	3560	Vu10	26183662	26187221	PF03765,PF00650	PTHR23324,PTHR23324:SF57	0	0	0
Vung68429|c0_g1_i1	Vigun08g183400	Vigun08g183400.1	(1 of 2) PTHR10015//PTHR10015:SF177 - HEAT SHOCK TRANSCRIPTION FACTOR // SUBFAMILY NOT NAMED	1856	Vu08	35301848	35303703	PF00447	PTHR10015,PTHR10015:SF177	0	K09419	GO:0043565,GO:0006355,GO:0005634,GO:0003700
Vung54123|c0_g1_i1	Vigun01g098500	Vigun01g098500.1	(1 of 1) PTHR31810//PTHR31810:SF2 - FAMILY NOT NAMED // METACASPASE-9	2117	Vu01	26534058	26536174	PF00656	PTHR31810,PTHR31810:SF2	0	0	GO:0006508,GO:0004197
Vung95571|c0_g1_i1	Vigun11g056400	Vigun11g056400.2	(1 of 6) K01595 - phosphoenolpyruvate carboxylase (ppc)	7430	Vu11	11081606	11089035	PF00311	PTHR30523,PTHR30523:SF8	4.1.1.31	K01595	GO:0015977,GO:0008964,GO:0006099
Vung50840|c0_g1_i1	Vigun03g098500	Vigun03g098500.1	(1 of 4) PTHR12411:SF371 - CATHEPSIN O	1912	Vu03	8398322	8400233	PF08246,PF00112	PTHR12411,PTHR12411:SF371	3.4.22.14	0	GO:0008234,GO:0006508
Vung57799|c6_g3_i4	Vigun06g109300	Vigun06g109300.1	(1 of 12) 2.3.1.196 - Benzyl alcohol O-benzoyltransferase	4433	Vu06	23841610	23846042	PF02458	PTHR31642,PTHR31642:SF9	2.3.1.196	0	GO:0016747
Vung23582|c0_g1_i1	Vigun03g224700	Vigun03g224700.1	(1 of 2) PTHR14155//PTHR14155:SF94 - RING FINGER DOMAIN-CONTAINING // RING-H2 FINGER PROTEIN ATL33-RELATED	1857	Vu03	37302757	37304613	PF13639	PTHR14155,PTHR14155:SF94	0	K19041	GO:0008270,GO:0005515
Vung9781|c2_g1_i3	Vigun02g121900	Vigun02g121900.1	(1 of 34) PF00314 - Thaumatin family (Thaumatin)	2293	Vu02	27409734	27412026	PF00314	PTHR31048,PTHR31048:SF3	0	0	0
Vung56955|c0_g1_i3	Vigun07g283000	Vigun07g283000.1	(1 of 17) PF02893 - GRAM domain (GRAM)	1634	Vu07	39697882	39699515	PF02893	PTHR31969	0	0	0
Vung138089|c0_g1_i1	Vigun04g081900	Vigun04g081900.1	(1 of 3) PTHR10891//PTHR10891:SF621 - EF-HAND CALCIUM-BINDING DOMAIN CONTAINING PROTEIN // SUBFAMILY NOT NAMED	827	Vu04	12375943	12376769	PF13833	PTHR10891,PTHR10891:SF621	0	K13448	0
Vung142834|c1_g1_i1	Vigun10g196800	Vigun10g196800.1	(1 of 54) PF02298 - Plastocyanin-like domain (Cu_bind_like)	1351	Vu10	41001435	41002785	PF02298	PTHR33021,PTHR33021:SF13	0	0	GO:0009055
Vung148266|c0_g1_i1	Vigun04g025800	Vigun04g025800.1	(1 of 71) PF14368 - Probable lipid transfer (LTP_2)	677	Vu04	1993478	1994154	PF14368	PTHR33214	0	0	0
Vung87606|c0_g2_i1	Vigun02g134400	Vigun02g134400.1	(1 of 2) PTHR31636:SF53 - SCARECROW-LIKE PROTEIN 15	2151	Vu02	28454566	28456716	PF03514	PTHR31636,PTHR31636:SF53	0	0	0
Vung47805|c0_g1_i6	Vigun02g128100	Vigun02g128100.1	(1 of 1) PTHR31451:SF8 - MANNAN ENDO-1,4-BETA-MANNOSIDASE 3-RELATED	2727	Vu02	28007984	28010710	PF00150	PTHR31451,PTHR31451:SF8	3.2.1.78	K19355	GO:0005975,GO:0004553
Vung16847|c1_g1_i4	Vigun06g224200	Vigun06g224200.1	(1 of 2) PTHR31235//PTHR31235:SF27 - FAMILY NOT NAMED // PEROXIDASE 62-RELATED	1880	Vu06	33279492	33281371	PF00141	PTHR31235,PTHR31235:SF27	1.11.1.7	K00430	GO:0055114,GO:0020037,GO:0006979,GO:0004601
Vung106366|c1_g1_i2	Vigun08g134900	Vigun08g134900.1	(1 of 2) PF00170//PF07716 - bZIP transcription factor (bZIP_1) // Basic region leucine zipper (bZIP_2)	2750	Vu08	30609113	30611862	PF00170	PTHR13690,PTHR13690:SF82	0	0	GO:0043565,GO:0006355,GO:0003700
Vung22769|c0_g2_i2	Vigun03g441800	Vigun03g441800.1	(1 of 3) PTHR10980//PTHR10980:SF18 - RHO GDP-DISSOCIATION INHIBITOR // IMMUNOGLOBULIN E-SET SUPERFAMILY PROTEIN	2280	Vu03	64448085	64450364	PF02115	PTHR10980,PTHR10980:SF18	0	K12462	GO:0005737,GO:0005094
Vung166429|c2_g1_i9	Vigun09g122100	Vigun09g122100.1	(1 of 1) PTHR31339:SF4 - PECTIN LYASE-LIKE SUPERFAMILY PROTEIN	3721	Vu09	27280890	27284610	PF12708	PTHR31339,PTHR31339:SF4	0	0	0
Vung78481|c1_g1_i1	Vigun02g003100	Vigun02g003100.1	(1 of 1) PTHR11062//PTHR11062:SF68 - EXOSTOSIN HEPARAN SULFATE GLYCOSYLTRANSFERASE -RELATED // EXOSTOSIN FAMILY PROTEIN	3260	Vu02	1597489	1600748	PF03016	PTHR11062,PTHR11062:SF68	0	0	0
Vung102960|c2_g2_i1	Vigun04g112000	Vigun04g112000.1	(1 of 2) 1.4.1.2 - Glutamate dehydrogenase / Glutamic dehydrogenase	4411	Vu04	28107433	28111843	PF02812,PF00208	PTHR11606,PTHR11606:SF12	1.4.1.2	K00261	GO:0055114,GO:0016491,GO:0006520
Vung70149|c1_g1_i6	Vigun03g033300	Vigun03g033300.1	(1 of 2) K09490 - heat shock 70kDa protein 5 (HSPA5, BIP)	4364	Vu03	2563282	2567645	PF00012	PTHR19375,PTHR19375:SF228	0	K09490	0
Vung161614|c0_g1_i1	Vigun01g170100	Vigun01g170100.1	(1 of 1) PF00024//PF00954//PF01453 - PAN domain (PAN_1) // S-locus glycoprotein domain (S_locus_glycop) // D-mannose binding lectin (B_lectin)	2195	Vu01	35205436	35207630	PF00024,PF00954,PF01453	PTHR11795,PTHR11795:SF386	0	0	GO:0048544
Vung112393|c0_g1_i4	Vigun03g340900	Vigun03g340900.1	(1 of 3) PTHR32227//PTHR32227:SF75 - FAMILY NOT NAMED // GLUCAN ENDO-1,3-BETA-GLUCOSIDASE-LIKE PROTEIN 2-RELATED	3583	Vu03	53973096	53976678	PF07983	PTHR32227,PTHR32227:SF75	0	0	0
Vung72345|c1_g1_i2	Vigun08g027700	Vigun08g027700.1	(1 of 3) 3.5.1.1 - Asparaginase / L-asparagine amidohydrolase	2498	Vu08	2506230	2508727	PF01112	PTHR10188,PTHR10188:SF13	3.5.1.1	K13051	GO:0016787
Vung110314|c1_g2_i1	Vigun08g170100	Vigun08g170100.1	(1 of 1) PTHR22835//PTHR22835:SF276 - ZINC FINGER FYVE DOMAIN CONTAINING PROTEIN // SUBFAMILY NOT NAMED	3800	Vu08	34084647	34088446	PF00657	PTHR22835,PTHR22835:SF276	3.1.1.3	0	GO:0016788
Vung14|c0_g1_i3	Vigun05g221300	Vigun05g221300.1	(1 of 8) PTHR10641//PTHR10641:SF584 - MYB-LIKE DNA-BINDING PROTEIN MYB // SUBFAMILY NOT NAMED	1649	Vu05	41293484	41295132	PF00249	PTHR10641,PTHR10641:SF584	0	K09422	0
Vung131574|c0_g2_i1	Vigun06g187700	Vigun06g187700.1	0	1153	Vu06	30650609	30651761	0	PTHR37180,PTHR37180:SF1	0	0	0
Vung143426|c0_g1_i1	Vigun08g007100	Vigun08g007100.1	(1 of 2) PTHR23201:SF2 - GIBBERELLIN-REGULATED PROTEIN 1-RELATED	1435	Vu08	615890	617324	PF02704	PTHR23201,PTHR23201:SF2	0	0	0
Vung104358|c1_g1_i2	Vigun06g189500	Vigun06g189500.1	(1 of 2) PTHR27000:SF154 - LEUCINE-RICH REPEAT RECEPTOR-LIKE PROTEIN KINASE	3401	Vu06	30750539	30753939	PF13855,PF07714	PTHR27000,PTHR27000:SF154	2.7.11.1	0	GO:0005515,GO:0006468,GO:0004672
Vung144426|c0_g1_i3	Vigun08g135300	Vigun08g135300.1	(1 of 2) PTHR32258:SF4 - KINASE INTERACTING (KIP1-LIKE) FAMILY PROTEIN	5624	Vu08	30672420	30678043	PF07765	PTHR32258,PTHR32258:SF4	0	0	0
Vung92591|c3_g1_i15	Vigun04g202100	Vigun04g202100.1	(1 of 6) PTHR11206:SF87 - MATE EFFLUX FAMILY PROTEIN-RELATED	2917	Vu04	42497816	42500732	PF01554	PTHR11206,PTHR11206:SF87	0	K03327	GO:0055085,GO:0016020,GO:0015297,GO:0015238,GO:0006855
Vung145780|c0_g1_i1	Vigun01g250700	Vigun01g250700.1	(1 of 2) PTHR31062:SF34 - XYLOGLUCAN ENDOTRANSGLUCOSYLASE/HYDROLASE PROTEIN 15-RELATED	1593	Vu01	41724478	41726070	PF06955,PF00722	PTHR31062,PTHR31062:SF34	2.4.1.207,3.2.1.151	K08235	GO:0048046,GO:0016762,GO:0006073,GO:0005618,GO:0005975,GO:0004553
Vung83335|c1_g1_i2	Vigun05g145700	Vigun05g145700.1	(1 of 23) PTHR33107:SF5 - KUNITZ FAMILY TRYPSIN AND PROTEASE INHIBITOR PROTEIN-RELATED	768	Vu05	19888403	19889170	PF00197	PTHR33107,PTHR33107:SF5	0	0	GO:0004866
Vung115707|c1_g4_i10	Vigun03g140800	Vigun03g140800.1	(1 of 46) 1.3.3.8 - Tetrahydroberberine oxidase / THB oxidase	2031	Vu03	14048370	14050400	PF08031,PF01565	PTHR32448	1.3.3.8	0	GO:0055114,GO:0050660,GO:0016491
Vung154389|c2_g3_i2	Vigun10g022400	Vigun10g022400.1	(1 of 8) K07119 - uncharacterized protein (K07119)	3161	Vu10	2649415	2652575	PF00107,PF16884	PTHR11695,PTHR11695:SF504	1.3.1.74	K07119	GO:0055114,GO:0016491,GO:0008270
Vung145780|c0_g1_i3	Vigun01g250700	Vigun01g250700.1	(1 of 2) PTHR31062:SF34 - XYLOGLUCAN ENDOTRANSGLUCOSYLASE/HYDROLASE PROTEIN 15-RELATED	1593	Vu01	41724478	41726070	PF06955,PF00722	PTHR31062,PTHR31062:SF34	2.4.1.207,3.2.1.151	K08235	GO:0048046,GO:0016762,GO:0006073,GO:0005618,GO:0005975,GO:0004553
Vung12315|c7_g2_i2	Vigun03g143200	Vigun03g143200.1	(1 of 4) PTHR32448//PTHR32448:SF11 - FAMILY NOT NAMED // BERBERINE BRIDGE ENZYME-RELATED	1947	Vu03	14465347	14467293	PF08031,PF01565	PTHR32448,PTHR32448:SF11	1.3.3.8	0	GO:0055114,GO:0050660,GO:0016491
Vung67220|c5_g6_i1	Vigun07g122400	Vigun07g122400.1	(1 of 13) K10406 - kinesin family member C2/C3 (KIFC2_3)	6179	Vu07	22573942	22580120	PF00307,PF00225	PTHR24115,PTHR24115:SF468	3.6.4.5	K10406	GO:0005515,GO:0008017,GO:0007018,GO:0005524,GO:0003777,GO:0005871
Vung37743|c1_g1_i1	Vigun11g100500	Vigun11g100500.1	(1 of 190) PF00847 - AP2 domain (AP2)	1006	Vu11	29469028	29470033	PF00847	PTHR31677	0	0	GO:0006355,GO:0003700
Vung34431|c0_g1_i1	Vigun10g013100	Vigun10g013100.2	(1 of 35) KOG0513 - Ca2+-independent phospholipase A2	4259	Vu10	1412267	1416525	PF01734	PTHR32176	0	0	GO:0006629
Vung4579|c0_g2_i1	Vigun05g121100	Vigun05g121100.1	(1 of 2) PTHR11709//PTHR11709:SF70 - MULTI-COPPER OXIDASE // SUBFAMILY NOT NAMED	2682	Vu05	13307925	13310606	PF07731,PF07732,PF00394	PTHR11709,PTHR11709:SF70	1.10.3.2	K05909	GO:0055114,GO:0016491,GO:0005507
Vung131664|c0_g4_i1	Vigun10g150300	Vigun10g150300.1	(1 of 1) PTHR11514:SF40 - TRANSCRIPTION FACTOR BHLH14	859	Vu10	36934790	36935648	PF00010	PTHR11514,PTHR11514:SF40	0	0	GO:0046983
Vung25236|c0_g1_i1	Vigun06g030800	Vigun06g030800.1	(1 of 2) PTHR31339:SF3 - GLYCOSIDE HYDROLASE FAMILY 28 PROTEIN / POLYGALACTURONASE (PECTINASE) FAMILY PROTEIN	6873	Vu06	13460703	13467575	PF12708	PTHR31339,PTHR31339:SF3	0	0	0
Vung64236|c1_g1_i3	Vigun04g128500	Vigun04g128500.2	(1 of 190) PF00847 - AP2 domain (AP2)	2997	Vu04	32337493	32340489	PF00847	PTHR31190	0	0	GO:0006355,GO:0003700
Vung146491|c0_g1_i2	Vigun05g019100	Vigun05g019100.1	(1 of 1) PTHR11732//PTHR11732:SF226 - ALDO/KETO REDUCTASE // SUBFAMILY NOT NAMED	2016	Vu05	1564460	1566475	PF00248	PTHR11732,PTHR11732:SF226	1.1.1.317	0	0
Vung131767|c0_g2_i1	Vigun05g283800	Vigun05g283800.1	(1 of 1) PTHR15907:SF46 - PROTEIN PLANT CADMIUM RESISTANCE 8	1615	Vu05	47203204	47204818	PF04749	PTHR15907,PTHR15907:SF46	0	0	0
Vung19872|c1_g1_i1	Vigun03g252500	Vigun03g252500.1	(1 of 24) PF03087 - Arabidopsis protein of unknown function (DUF241)	1296	Vu03	41883623	41884918	PF03087	PTHR31509,PTHR31509:SF14	0	0	0
Vung58127|c0_g2_i25	Vigun08g139300	Vigun08g139300.1	(1 of 8) K10706 - senataxin [EC:3.6.4.-] (SETX, ALS4)	5218	Vu08	31187276	31192493	PF13245,PF13087	PTHR10887,PTHR10887:SF358	0	K10706	0
Vung87673|c1_g2_i1	Vigun03g419600	Vigun03g419600.1	(1 of 190) PF00847 - AP2 domain (AP2)	1263	Vu03	62579905	62581167	PF00847	PTHR31190,PTHR31190:SF18	0	0	GO:0006355,GO:0003700
Vung161732|c0_g1_i1	Vigun06g039200	Vigun06g039200.1	0	756	Vu06	15800823	15801578	0	PTHR33726,PTHR33726:SF3	0	0	0
Vung42040|c0_g1_i4	Vigun03g098000	Vigun03g098000.1	(1 of 4) PTHR12411:SF371 - CATHEPSIN O	1834	Vu03	8325651	8327484	PF08246,PF00112	PTHR12411,PTHR12411:SF371	3.4.22.14	0	GO:0008234,GO:0006508
Vung66214|c1_g1_i4	Vigun07g044100	Vigun07g044100.1	(1 of 7) 1.1.1.100 - 3-oxoacyl-[acyl-carrier-protein] reductase	3378	Vu07	4471516	4474893	PF13561	PTHR24322,PTHR24322:SF364	1.1.1.100	0	0
Vung53703|c7_g2_i3	Vigun04g141300	Vigun04g141300.1	(1 of 2) PTHR11817:SF2 - PLASTIDIAL PYRUVATE KINASE 2	5787	Vu04	35011903	35017689	PF02887,PF00224	PTHR11817,PTHR11817:SF2	2.7.1.40	K00873	GO:0030955,GO:0006096,GO:0004743,GO:0000287
Vung75777|c2_g1_i1	Vigun11g024700	Vigun11g024700.1	(1 of 11) 1.3.1.42 - 12-oxophytodienoate reductase	1731	Vu11	3174400	3176130	PF00724	PTHR22893,PTHR22893:SF44	1.3.1.42	K05894	GO:0055114,GO:0016491,GO:0010181
Vung147402|c5_g1_i26	Vigun03g449400	Vigun03g449400.3	(1 of 3) PTHR31384//PTHR31384:SF28 - FAMILY NOT NAMED // AUXIN RESPONSE FACTOR 1	2728	Vu03	65049409	65052136	PF06507	PTHR31384,PTHR31384:SF28	0	0	GO:0009725,GO:0006355,GO:0005634,GO:0003677
Vung41084|c1_g2_i1	Vigun10g022400	Vigun10g022400.1	(1 of 8) K07119 - uncharacterized protein (K07119)	3161	Vu10	2649415	2652575	PF00107,PF16884	PTHR11695,PTHR11695:SF504	1.3.1.74	K07119	GO:0055114,GO:0016491,GO:0008270
Vung122299|c0_g1_i2	Vigun11g123200	Vigun11g123200.1	(1 of 8) PTHR33057//PTHR33057:SF17 - FAMILY NOT NAMED // GB|AAD12216.1-RELATED	1610	Vu11	33046489	33048098	PF04844	PTHR33057,PTHR33057:SF17	0	0	0
Vung44648|c1_g1_i1	Vigun03g403000	Vigun03g403000.1	(1 of 1) PTHR32227:SF59 - O-GLYCOSYL HYDROLASES FAMILY 17 PROTEIN	1806	Vu03	61004742	61006547	PF07983,PF00332	PTHR32227,PTHR32227:SF59	3.2.1.39	0	GO:0005975,GO:0004553
Vung152339|c0_g1_i1	Vigun10g088400	Vigun10g088400.1	(1 of 3) PTHR19317//PTHR19317:SF9 - PRENYLATED RAB ACCEPTOR 1-RELATED // PRA1 FAMILY PROTEIN B1-RELATED	2371	Vu10	25418514	25420884	PF03208	PTHR19317,PTHR19317:SF9	0	0	0
Vung64236|c1_g1_i2	Vigun04g128500	Vigun04g128500.1	(1 of 190) PF00847 - AP2 domain (AP2)	2997	Vu04	32337493	32340489	PF00847	PTHR31190	0	0	GO:0006355,GO:0003700
Vung92516|c0_g1_i1	Vigun07g252100	Vigun07g252100.1	(1 of 1) PTHR30620//PTHR30620:SF31 - PERIPLASMIC BETA-GLUCOSIDASE-RELATED // SUBFAMILY NOT NAMED	3685	Vu07	37117763	37121447	PF14310,PF00933,PF01915	PTHR30620,PTHR30620:SF31	3.2.1.55,3.2.1.37	K15920	GO:0005975,GO:0004553
Vung87507|c2_g3_i25	Vigun11g163900	Vigun11g163900.1	(1 of 33) K01188 - beta-glucosidase (E3.2.1.21)	3030	Vu11	37140616	37143645	PF00232	PTHR10353,PTHR10353:SF81	3.2.1.21	K01188	GO:0005975,GO:0004553
Vung79726|c0_g1_i1	Vigun09g184500	Vigun09g184500.1	(1 of 5) K15104 - solute carrier family 25 (mitochondrial oxoglutarate transporter), member 11 (SLC25A11, OGC)	903	Vu09	35809727	35810629	PF00153	PTHR24089,PTHR24089:SF392	0	K15104	0
Vung51488|c4_g1_i3	Vigun04g185400	Vigun04g185400.2	(1 of 28) PTHR32212//PTHR32212:SF126 - FAMILY NOT NAMED // EMB|CAB62440.1-RELATED	2426	Vu04	41041747	41044172	PF00646,PF08387	PTHR32212,PTHR32212:SF126	0	0	GO:0005515
Vung5838|c0_g1_i1	Vigun11g079100	Vigun11g079100.1	(1 of 54) PF02298 - Plastocyanin-like domain (Cu_bind_like)	1842	Vu11	23240110	23241951	PF02298	PTHR33021,PTHR33021:SF60	0	0	GO:0009055
Vung97278|c0_g1_i1	Vigun01g027800	Vigun01g027800.1	(1 of 2) PTHR13683//PTHR13683:SF258 - ASPARTYL PROTEASES // ASPARTYL PROTEASE FAMILY PROTEIN-RELATED	4166	Vu01	3318092	3322257	PF00026	PTHR13683,PTHR13683:SF258	3.4.23.12	0	GO:0006508,GO:0004190
Vung134920|c2_g1_i4	Vigun05g011600	Vigun05g011600.1	(1 of 1) PTHR32227//PTHR32227:SF54 - FAMILY NOT NAMED // BETA-1, 3-GLUCANASE-LIKE PROTEIN-RELATED	2475	Vu05	936006	938480	PF07983,PF00332	PTHR32227,PTHR32227:SF54	3.2.1.39	0	GO:0005975,GO:0004553
Vung166196|c1_g1_i8	Vigun03g118100	Vigun03g118100.1	(1 of 5) 4.2.3.48 - (3S,6E)-nerolidol synthase / Nerolidol synthase	2314	Vu03	10985361	10987674	PF03936	PTHR31225,PTHR31225:SF0	4.2.3.48	0	GO:0016829,GO:0010333,GO:0000287
Vung99218|c2_g1_i1	Vigun04g060600	Vigun04g060600.1	(1 of 2) PTHR31680:SF4 - PROTEIN LONGIFOLIA 1-RELATED	4947	Vu04	6210470	6215416	PF14383,PF14309	PTHR31680,PTHR31680:SF4	0	0	0
Vung11982|c3_g1_i1	Vigun01g023400	Vigun01g023400.1	(1 of 1) PTHR13301//PTHR13301:SF61 - X-BOX TRANSCRIPTION FACTOR-RELATED // SUBFAMILY NOT NAMED	7558	Vu01	2538456	2546013	PF13632,PF14569	PTHR13301,PTHR13301:SF61	2.4.1.12	K10999	0
Vung102341|c0_g2_i1	Vigun09g153200	Vigun09g153200.1	(1 of 92) PF03106 - WRKY DNA -binding domain (WRKY)	2097	Vu09	31838346	31840442	PF03106	PTHR32096,PTHR32096:SF20	0	0	GO:0043565,GO:0006355,GO:0003700
Vung46233|c1_g1_i2	Vigun08g030900	Vigun08g030900.2	(1 of 2) PTHR24206:SF35 - TRANSCRIPTION FACTOR-RELATED	2907	Vu08	2830847	2833753	PF00412	PTHR24206,PTHR24206:SF35	0	K09377	GO:0008270
Vung107774|c0_g2_i1	Vigun03g129200	Vigun03g129200.1	(1 of 3) 3.6.3.39 - Lipopolysaccharide-transporting ATPase	2960	Vu03	12510252	12513211	PF00005,PF01061	PTHR19241,PTHR19241:SF301	3.6.3.39	0	GO:0016887,GO:0005524,GO:0016020
Vung52583|c0_g1_i1	Vigun11g024700	Vigun11g024700.1	(1 of 11) 1.3.1.42 - 12-oxophytodienoate reductase	1731	Vu11	3174400	3176130	PF00724	PTHR22893,PTHR22893:SF44	1.3.1.42	K05894	GO:0055114,GO:0016491,GO:0010181
Vung129133|c0_g1_i4	Vigun08g215500	Vigun08g215500.3	(1 of 14) PTHR23155//PTHR23155:SF554 - LEUCINE-RICH REPEAT-CONTAINING PROTEIN // SUBFAMILY NOT NAMED	11097	Vu08	37581987	37593083	PF00931	PTHR23155,PTHR23155:SF554	0	0	GO:0043531
Vung83335|c1_g1_i1	Vigun05g146200	Vigun05g146200.1	(1 of 23) PTHR33107:SF5 - KUNITZ FAMILY TRYPSIN AND PROTEASE INHIBITOR PROTEIN-RELATED	783	Vu05	20147906	20148688	PF00197	PTHR33107,PTHR33107:SF5	0	0	GO:0004866
Vung137421|c5_g3_i5	Vigun03g379700	Vigun03g379700.1	(1 of 1) 1.1.1.267//2.2.1.7 - 1-deoxy-D-xylulose-5-phosphate reductoisomerase / DXP-reductoisomerase // 1-deoxy-D-xylulose-5-phosphate synthase / DXP-synthase	3771	Vu03	58394423	58398193	PF02780,PF02779,PF13292	PTHR11624,PTHR11624:SF84	2.2.1.7,1.1.1.267	K01662	GO:0008152,GO:0003824,GO:0016114,GO:0008661
Vung43353|c1_g1_i1	Vigun06g048000	Vigun06g048000.1	(1 of 11) PTHR23155//PTHR23155:SF638 - LEUCINE-RICH REPEAT-CONTAINING PROTEIN // SUBFAMILY NOT NAMED	3543	Vu06	17234160	17237702	0	PTHR23155,PTHR23155:SF638	0	0	0
Vung148752|c1_g1_i2	Vigun04g108000	Vigun04g108000.1	(1 of 10) 1.14.13.89 - Isoflavone 2'-hydroxylase / Isoflavone 2'-monooxygenase	1995	Vu04	26265005	26266999	PF00067	PTHR24298,PTHR24298:SF61	1.14.13.89	0	GO:0055114,GO:0020037,GO:0016705,GO:0005506
Vung155239|c2_g1_i4	Vigun02g201000	Vigun02g201000.1	(1 of 10) K15015 - solute carrier family 32 (vesicular inhibitory amino acid transporter) (SLC32A, VGAT)	2148	Vu02	33587101	33589248	PF01490	PTHR22950,PTHR22950:SF280	0	K15015	0
Vung143131|c7_g10_i3	Vigun11g007600	Vigun11g007600.1	(1 of 1) PTHR10502//PTHR10502:SF104 - ANNEXIN // ANNEXIN D4	3303	Vu11	821907	825209	PF00191	PTHR10502,PTHR10502:SF104	0	K17099	GO:0005544,GO:0005509
Vung5173|c1_g2_i1	Vigun05g283600	Vigun05g283600.1	(1 of 4) PTHR11654:SF157 - PROTEIN NRT1/ PTR FAMILY 1.1-RELATED	3213	Vu05	47194705	47197917	PF00854	PTHR11654,PTHR11654:SF157	0	0	GO:0016020,GO:0006810,GO:0005215
Vung137089|c4_g3_i1	Vigun05g279200	Vigun05g279200.1	(1 of 2) PTHR22835//PTHR22835:SF170 - ZINC FINGER FYVE DOMAIN CONTAINING PROTEIN // SUBFAMILY NOT NAMED	1691	Vu05	46862247	46863937	PF00657	PTHR22835,PTHR22835:SF170	3.1.1.3	0	GO:0016788
Vung8636|c0_g1_i1	Vigun02g198700	Vigun02g198700.1	(1 of 2) PTHR10209//PTHR10209:SF90 - OXIDOREDUCTASE, 2OG-FE II OXYGENASE FAMILY PROTEIN // GIBBERELLIN 2-BETA-DIOXYGENASE 7-RELATED	1750	Vu02	33372382	33374131	PF14226,PF03171	PTHR10209,PTHR10209:SF90	1.14.11.13	K04125	GO:0055114,GO:0016491
Vung51542|c1_g1_i6	Vigun11g123500	Vigun11g123500.1	(1 of 6) 1.1.1.331 - Secoisolariciresinol dehydrogenase	1259	Vu11	33089708	33090966	PF13561	PTHR24322,PTHR24322:SF600	1.1.1.331	0	0
Vung58923|c0_g1_i1	Vigun05g017900	Vigun05g017900.1	(1 of 2) PF00612//PF02179 - IQ calmodulin-binding motif (IQ) // BAG domain (BAG)	1110	Vu05	1451703	1452812	PF00612,PF02179	PTHR33322,PTHR33322:SF6	0	0	GO:0005515,GO:0051087
Vung80802|c0_g1_i1	Vigun03g284400	Vigun03g284400.1	(1 of 5) PTHR10795//PTHR10795:SF388 - PROPROTEIN CONVERTASE SUBTILISIN/KEXIN // SUBFAMILY NOT NAMED	4481	Vu03	46539793	46544273	PF05922,PF02225,PF00082	PTHR10795,PTHR10795:SF388	3.4.14.10	0	GO:0006508,GO:0004252
Vung138675|c1_g1_i1	Vigun05g095200	Vigun05g095200.2	(1 of 1) PTHR27008//PTHR27008:SF4//PTHR27008:SF9 - FAMILY NOT NAMED // LEUCINE-RICH REPEAT PROTEIN KINASE FAMILY PROTEIN // SUBFAMILY NOT NAMED	5290	Vu05	9238584	9243873	PF00069,PF08263,PF13855	PTHR27008,PTHR27008:SF4	2.7.11.1,2.7.10.2	0	GO:0006468,GO:0005524,GO:0004672,GO:0005515
Vung116217|c0_g1_i1	Vigun04g063600	Vigun04g063600.1	(1 of 3) K12640 - brassinosteroid-6-oxidase 2 (CYP85A2, BR6OX2)	6920	Vu04	6835664	6842583	PF00067	PTHR24286,PTHR24286:SF8	0	K12640	GO:0055114,GO:0020037,GO:0016705,GO:0005506
Vung86207|c2_g1_i1	Vigun07g174400	Vigun07g174400.2	0	1634	Vu07	28955784	28957417	0	PTHR39110	0	0	0
Vung134469|c0_g1_i1	Vigun04g102200	Vigun04g102200.1	(1 of 9) PF03007//PF06974 - Wax ester synthase-like Acyl-CoA acyltransferase domain (WES_acyltransf) // Protein of unknown function (DUF1298) (DUF1298)	4028	Vu04	23562992	23567019	PF03007,PF06974	PTHR31650,PTHR31650:SF7	0	0	GO:0045017,GO:0004144
Vung51983|c1_g2_i1	Vigun04g151300	Vigun04g151300.2	(1 of 5) PTHR10283//PTHR10283:SF94 - SOLUTE CARRIER FAMILY 13 MEMBER // SUBFAMILY NOT NAMED	6935	Vu04	36811563	36818497	PF03600	PTHR10283,PTHR10283:SF94	0	0	GO:0055085,GO:0016021
Vung91822|c2_g2_i13	Vigun10g012900	Vigun10g012900.1	(1 of 35) KOG0513 - Ca2+-independent phospholipase A2	3332	Vu10	1384918	1388249	PF01734	PTHR32176	0	0	GO:0006629
Vung117916|c2_g1_i8	Vigun03g339600	Vigun03g339600.3	(1 of 2) PTHR14363//PTHR14363:SF17 - HEPARANASE-RELATED // HEPARANASE-LIKE PROTEIN 1-RELATED	4103	Vu03	53791796	53795898	PF03662	PTHR14363,PTHR14363:SF17	3.2.1.31,3.2.1.167	K07964	GO:0016798,GO:0016020
Vung147898|c0_g2_i2	Vigun04g026100	Vigun04g026100.2	(1 of 3) K08099 - chlorophyllase (E3.1.1.14)	3065	Vu04	2012722	2015786	PF12695	PTHR33428,PTHR33428:SF2	3.1.1.14	0	0
Vung8032|c1_g1_i1	Vigun04g048100	Vigun04g048100.1	(1 of 2) PTHR23070:SF44 - AAA-TYPE ATPASE FAMILY PROTEIN-RELATED	1938	Vu04	4145585	4147522	PF00004,PF14363	PTHR23070,PTHR23070:SF44	0	K08900	GO:0005524
Vung137089|c4_g3_i4	Vigun05g279200	Vigun05g279200.1	(1 of 2) PTHR22835//PTHR22835:SF170 - ZINC FINGER FYVE DOMAIN CONTAINING PROTEIN // SUBFAMILY NOT NAMED	1691	Vu05	46862247	46863937	PF00657	PTHR22835,PTHR22835:SF170	3.1.1.3	0	GO:0016788
Vung137817|c0_g1_i9	Vigun03g236900	Vigun03g236900.1	(1 of 19) PF03181 - BURP domain (BURP)	2552	Vu03	39436154	39438705	PF03181	PTHR31458,PTHR31458:SF2	0	0	0
Vung116218|c1_g1_i3	Vigun04g081600	Vigun04g081600.1	(1 of 55) PF03140 - Plant protein of unknown function (DUF247)	3081	Vu04	12284058	12287138	PF03140	PTHR31549,PTHR31549:SF27	0	0	0
Vung50296|c6_g3_i1	Vigun11g189100	Vigun11g189100.1	(1 of 2) PTHR22950//PTHR22950:SF242 - AMINO ACID TRANSPORTER // SUBFAMILY NOT NAMED	4308	Vu11	38884657	38888964	PF01490	PTHR22950,PTHR22950:SF242	0	K13946	0
Vung69629|c3_g3_i11	Vigun05g069200	Vigun05g069200.1	(1 of 5) PTHR23155//PTHR23155:SF443 - LEUCINE-RICH REPEAT-CONTAINING PROTEIN // SUBFAMILY NOT NAMED	2627	Vu05	5966845	5969471	0	PTHR23155,PTHR23155:SF443	0	0	0
Vung7412|c0_g1_i2	Vigun09g153700	Vigun09g153700.1	(1 of 4) PTHR31194//PTHR31194:SF16 - SHN SHINE , DNA BINDING / TRANSCRIPTION FACTOR // SUBFAMILY NOT NAMED	1020	Vu09	31904513	31905532	PF00847	PTHR31194,PTHR31194:SF16	0	0	GO:0006355,GO:0003700
Vung4407|c0_g1_i2	Vigun02g124600	Vigun02g124600.4	(1 of 1) PTHR24115//PTHR24115:SF496 - FAMILY NOT NAMED // ATP BINDING MICROTUBULE MOTOR FAMILY PROTEIN	6650	Vu02	27655961	27662610	PF11995,PF00225	PTHR24115,PTHR24115:SF496	3.6.4.4	K11498	GO:0008017,GO:0007018,GO:0005524,GO:0003777,GO:0005871
Vung118278|c1_g1_i9	Vigun04g075000	Vigun04g075000.1	(1 of 5) PTHR10209:SF108 - 2-OXOGLUTARATE (2OG) AND FE(II)-DEPENDENT OXYGENASE-LIKE PROTEIN	1532	Vu04	9159695	9161226	PF03171,PF14226	PTHR10209,PTHR10209:SF108	1.14.11.9	0	GO:0055114,GO:0016491
Vung136699|c3_g1_i3	Vigun06g052000	Vigun06g052000.1	(1 of 11) PTHR22835//PTHR22835:SF116 - ZINC FINGER FYVE DOMAIN CONTAINING PROTEIN // SUBFAMILY NOT NAMED	3634	Vu06	17785693	17789326	PF00657	PTHR22835,PTHR22835:SF116	3.1.1.3	0	GO:0016788
Vung109383|c1_g1_i1	Vigun11g181000	Vigun11g181000.1	(1 of 3) K01179 - endoglucanase (E3.2.1.4)	5412	Vu11	38467454	38472865	PF00759	PTHR22298,PTHR22298:SF29	3.2.1.4	K01179	GO:0005975,GO:0004553
Vung119212|c4_g1_i6	Vigun05g030500	Vigun05g030500.1	(1 of 4) PTHR31673:SF3 - COBRA-LIKE EXTRACELLULAR GLYCOSYL-PHOSPHATIDYL INOSITOL-ANCHORED FAMILY PROTEIN-RELATED	2882	Vu05	2422972	2425853	PF04833	PTHR31673,PTHR31673:SF3	0	0	GO:0031225,GO:0016049,GO:0010215
Vung144494|c1_g1_i1	Vigun06g121300	Vigun06g121300.1	(1 of 7) PF06376 - Protein of unknown function (DUF1070) (DUF1070)	1184	Vu06	24876297	24877480	PF06376	PTHR33374,PTHR33374:SF1	0	0	0
Vung130443|c3_g2_i15	Vigun02g192300	Vigun02g192300.1	(1 of 11) 1.3.1.42 - 12-oxophytodienoate reductase	2136	Vu02	32929118	32931253	PF00724	PTHR22893,PTHR22893:SF44	1.3.1.42	K05894	GO:0055114,GO:0016491,GO:0010181
Vung125216|c1_g1_i2	Vigun04g148000	Vigun04g148000.1	(1 of 3) PTHR11528//PTHR11528:SF47 - HEAT SHOCK PROTEIN 90 // SUBFAMILY NOT NAMED	3217	Vu04	36361253	36364469	PF02518,PF00183	PTHR11528,PTHR11528:SF47	0	K04079	GO:0051082,GO:0006950,GO:0006457,GO:0005524
Vung89169|c0_g1_i1	Vigun03g128600	Vigun03g128600.1	0	679	Vu03	12437268	12437946	0	0	0	0	0
Vung31695|c3_g1_i1	Vigun10g171000	Vigun10g171000.5	(1 of 2) PTHR24092//PTHR24092:SF55 - FAMILY NOT NAMED // PHOSPHOLIPID-TRANSPORTING ATPASE TAT-1	7522	Vu10	38982631	38990152	PF12710,PF16209	PTHR24092,PTHR24092:SF55	3.6.3.1	K01530	GO:0016021,GO:0015914,GO:0005524,GO:0004012,GO:0000287
Vung18157|c2_g1_i4	Vigun10g143500	Vigun10g143500.1	(1 of 3) K14506 - jasmonic acid-amino synthetase (JAR1)	5332	Vu10	36077164	36082495	PF03321	PTHR31901,PTHR31901:SF3	0	K14506	GO:0080123,GO:0009864,GO:0009694,GO:0009611
Vung143984|c3_g1_i5	Vigun07g005300	Vigun07g005300.1	(1 of 6) PF00045 - Hemopexin (Hemopexin)	2076	Vu07	419168	421243	PF00045	0	0	0	0
Vung69381|c1_g1_i2	Vigun04g173800	Vigun04g173800.2	(1 of 11) PF05623 - Protein of unknown function (DUF789) (DUF789)	5997	Vu04	39817065	39823061	PF05623	PTHR31343,PTHR31343:SF7	0	0	0
Vung63459|c4_g1_i1	Vigun04g145700	Vigun04g145700.1	(1 of 2) PTHR32096//PTHR32096:SF22 - FAMILY NOT NAMED // WRKY TRANSCRIPTION FACTOR 27-RELATED	1862	Vu04	36094535	36096396	PF03106	PTHR32096,PTHR32096:SF22	0	0	GO:0043565,GO:0006355,GO:0003700
Vung130424|c0_g1_i1	Vigun04g141200	Vigun04g141200.1	(1 of 3) PTHR11177//PTHR11177:SF161 - CHITINASE // SUBFAMILY NOT NAMED	1258	Vu04	34940374	34941631	PF00704	PTHR11177,PTHR11177:SF161	3.2.1.14	0	GO:0005975,GO:0004553
Vung64236|c1_g1_i1	Vigun04g128500	Vigun04g128500.2	(1 of 190) PF00847 - AP2 domain (AP2)	2997	Vu04	32337493	32340489	PF00847	PTHR31190	0	0	GO:0006355,GO:0003700
Vung147898|c0_g2_i1	Vigun04g026100	Vigun04g026100.2	(1 of 3) K08099 - chlorophyllase (E3.1.1.14)	3065	Vu04	2012722	2015786	PF12695	PTHR33428,PTHR33428:SF2	3.1.1.14	0	0
Vung150535|c0_g2_i1	Vigun09g154300	Vigun09g154300.1	(1 of 1) PTHR33143//PTHR33143:SF6 - FAMILY NOT NAMED // F16F4.1 PROTEIN-RELATED	798	Vu09	31969170	31969967	PF05678	PTHR33143,PTHR33143:SF6	0	0	0
Vung3901|c0_g1_i4	Vigun07g005800	Vigun07g005800.1	0	988	Vu07	460045	461032	0	0	0	0	0
Vung88333|c2_g1_i19	Vigun11g024800	Vigun11g024800.3	(1 of 7) KOG2615 - Permease of the major facilitator superfamily	6124	Vu11	3205777	3211900	PF07690	PTHR23504,PTHR23504:SF29	0	0	GO:0055085,GO:0016021
Vung88333|c2_g1_i17	Vigun11g024800	Vigun11g024800.3	(1 of 7) KOG2615 - Permease of the major facilitator superfamily	6124	Vu11	3205777	3211900	PF07690	PTHR23504,PTHR23504:SF29	0	0	GO:0055085,GO:0016021
Vung147402|c5_g1_i29	Vigun03g449400	Vigun03g449400.3	(1 of 3) PTHR31384//PTHR31384:SF28 - FAMILY NOT NAMED // AUXIN RESPONSE FACTOR 1	2728	Vu03	65049409	65052136	PF06507	PTHR31384,PTHR31384:SF28	0	0	GO:0009725,GO:0006355,GO:0005634,GO:0003677
Vung150138|c2_g1_i3	Vigun05g253400	Vigun05g253400.1	(1 of 6) PTHR11177//PTHR11177:SF190 - CHITINASE // SUBFAMILY NOT NAMED	795	Vu05	44796877	44797671	0	PTHR11177,PTHR11177:SF190	3.2.1.14	0	0
Vung144597|c0_g2_i1	Vigun04g114800	Vigun04g114800.1	(1 of 3) PTHR23091//PTHR23091:SF208 - N-TERMINAL ACETYLTRANSFERASE // ACYL-COA N-ACYLTRANSFERASES SUPERFAMILY PROTEIN	2043	Vu04	28771309	28773351	PF00583	PTHR23091,PTHR23091:SF208	2.3.1.48	0	GO:0008080
Vung166455|c8_g3_i1	Vigun06g137500	Vigun06g137500.1	(1 of 6) PTHR32448:SF34 - F22M8.11 PROTEIN-RELATED	1795	Vu06	26300245	26302039	PF08031,PF01565	PTHR32448,PTHR32448:SF34	1.3.3.8	0	GO:0055114,GO:0050660,GO:0016491
Vung88333|c2_g1_i9	Vigun11g024800	Vigun11g024800.6	(1 of 7) KOG2615 - Permease of the major facilitator superfamily	6124	Vu11	3205777	3211900	PF00083	PTHR23504,PTHR23504:SF29	0	0	GO:0055085,GO:0022857,GO:0016021
Vung122111|c2_g1_i1	Vigun04g059300	Vigun04g059300.1	(1 of 3) PTHR11926//PTHR11926:SF289 - GLUCOSYL/GLUCURONOSYL TRANSFERASES // SUBFAMILY NOT NAMED	3937	Vu04	5963223	5967159	PF00201	PTHR11926,PTHR11926:SF289	2.4.1.203	0	GO:0016758,GO:0008152
Vung6777|c1_g2_i1	Vigun06g154000	Vigun06g154000.1	(1 of 3) PTHR23130//PTHR23130:SF80 - FAMILY NOT NAMED // AUXIN-INDUCED IN ROOT CULTURES PROTEIN 12	2261	Vu06	27802873	27805133	PF03188,PF04526	PTHR23130,PTHR23130:SF80	0	0	GO:0016021
Vung17248|c1_g2_i2	Vigun06g050500	Vigun06g050500.1	(1 of 1) PTHR24349:SF23 - MAP KINASE-ACTIVATED PROTEIN KINASE 5	6703	Vu06	17606048	17612750	PF13499,PF00069	PTHR24349,PTHR24349:SF23	2.7.11.17	K13412	GO:0006468,GO:0005524,GO:0004672
Vung52945|c3_g2_i12	Vigun05g033000	Vigun05g033000.1	(1 of 9) 2.3.1.115 - Isoflavone-7-O-beta-glucoside 6''-O-malonyltransferase / Flavone/flavonol 7-O-beta-D-glucoside malonyltransferase	1951	Vu05	2652206	2654156	PF02458	PTHR31625,PTHR31625:SF5	2.3.1.115	0	GO:0016747
Vung67141|c0_g3_i9	Vigun06g180600	Vigun06g180600.1	(1 of 2) PTHR11214//PTHR11214:SF92 - BETA-1,3-N-ACETYLGLUCOSAMINYLTRANSFERASE // BETA-1,3-GALACTOSYLTRANSFERASE 20-RELATED	6942	Vu06	30039270	30046211	PF01762,PF00337	PTHR11214,PTHR11214:SF92	2.4.1.134	0	GO:0016020,GO:0008378,GO:0006486,GO:0030246
Vung138047|c1_g1_i4	Vigun04g072800	Vigun04g072800.1	(1 of 3) 1.5.5.2 - Proline dehydrogenase	3506	Vu04	8556185	8559690	PF01619	PTHR13914,PTHR13914:SF0	1.5.5.2	K00318	GO:0006562,GO:0004657
Vung143131|c7_g10_i5	Vigun11g007600	Vigun11g007600.1	(1 of 1) PTHR10502//PTHR10502:SF104 - ANNEXIN // ANNEXIN D4	3303	Vu11	821907	825209	PF00191	PTHR10502,PTHR10502:SF104	0	K17099	GO:0005544,GO:0005509
Vung41730|c2_g4_i1	Vigun08g161200	Vigun08g161200.1	(1 of 3) PTHR10209:SF134 - 2-OXOGLUTARATE (2OG) AND FE(II)-DEPENDENT OXYGENASE-LIKE PROTEIN	3103	Vu08	33365251	33368353	PF03171,PF14226	PTHR10209,PTHR10209:SF134	1.14.11.23	0	GO:0055114,GO:0016491
Vung82271|c0_g1_i1	Vigun11g197400	Vigun11g197400.1	(1 of 2) PTHR23201:SF16 - PROLINE-RICH PROTEIN 4	1902	Vu11	39647845	39649746	PF01190	PTHR23201,PTHR23201:SF16	0	0	0
Vung47464|c4_g5_i4	Vigun04g114300	Vigun04g114300.1	(1 of 6) PTHR19139//PTHR19139:SF167 - AQUAPORIN TRANSPORTER // AQUAPORIN PIP2-1-RELATED	2802	Vu04	28649458	28652259	PF00230	PTHR19139,PTHR19139:SF167	0	K09872	GO:0016020,GO:0006810,GO:0005215
Vung88333|c2_g1_i6	Vigun11g024800	Vigun11g024800.3	(1 of 7) KOG2615 - Permease of the major facilitator superfamily	6124	Vu11	3205777	3211900	PF07690	PTHR23504,PTHR23504:SF29	0	0	GO:0055085,GO:0016021
Vung64649|c0_g1_i1	Vigun08g201300	Vigun08g201300.1	(1 of 11) KOG4293 - Predicted membrane protein, contains DoH and Cytochrome b-561/ferric reductase transmembrane domains	1739	Vu08	36557666	36559404	PF04526	PTHR23130,PTHR23130:SF102	0	0	0
Vung51206|c2_g2_i2	Vigun04g172800	Vigun04g172800.1	(1 of 55) PF03140 - Plant protein of unknown function (DUF247)	2067	Vu04	39671420	39673486	PF03140	PTHR31549,PTHR31549:SF23	0	0	0
Vung82903|c3_g2_i21	Vigun02g157400	Vigun02g157400.1	(1 of 3) PTHR19282//PTHR19282:SF262 - TETRASPANIN // SUBFAMILY NOT NAMED	4908	Vu02	30350842	30355749	PF00335	PTHR19282,PTHR19282:SF262	0	0	GO:0016021
Vung143984|c3_g1_i4	Vigun07g005300	Vigun07g005300.1	(1 of 6) PF00045 - Hemopexin (Hemopexin)	2076	Vu07	419168	421243	PF00045	0	0	0	0
Vung92815|c2_g4_i1	Vigun07g064600	Vigun07g064600.1	(1 of 2) PTHR11062//PTHR11062:SF66 - EXOSTOSIN HEPARAN SULFATE GLYCOSYLTRANSFERASE -RELATED // SUBFAMILY NOT NAMED	3158	Vu07	7518160	7521317	PF03016	PTHR11062,PTHR11062:SF66	2.4.2.41	0	0
Vung68912|c0_g1_i1	Vigun10g030300	Vigun10g030300.1	(1 of 1) PTHR22594//PTHR22594:SF36 - ASPARTYL/LYSYL-TRNA SYNTHETASE // ASPARAGINE--TRNA LIGASE, CYTOPLASMIC 2	4953	Vu10	3880447	3885399	PF00152	PTHR22594,PTHR22594:SF36	6.1.1.22	K01893	GO:0006418,GO:0005524,GO:0004812,GO:0000166
Vung166196|c1_g1_i7	Vigun03g118100	Vigun03g118100.1	(1 of 5) 4.2.3.48 - (3S,6E)-nerolidol synthase / Nerolidol synthase	2314	Vu03	10985361	10987674	PF03936	PTHR31225,PTHR31225:SF0	4.2.3.48	0	GO:0016829,GO:0010333,GO:0000287
Vung52936|c1_g1_i8	Vigun04g059500	Vigun04g059500.1	(1 of 3) PTHR11926//PTHR11926:SF289 - GLUCOSYL/GLUCURONOSYL TRANSFERASES // SUBFAMILY NOT NAMED	2073	Vu04	5998878	6000950	PF00201	PTHR11926,PTHR11926:SF289	2.4.1.203	0	GO:0016758,GO:0008152
Vung153510|c0_g1_i1	Vigun07g229400	Vigun07g229400.1	(1 of 2) PTHR31960//PTHR31960:SF5 - FAMILY NOT NAMED // F-BOX PROTEIN PP2-A14	3212	Vu07	35113030	35116241	PF14299	PTHR31960,PTHR31960:SF5	0	0	0
Vung103420|c1_g1_i1	Vigun05g022500	Vigun05g022500.1	(1 of 1) PTHR27001//PTHR27001:SF132 - FAMILY NOT NAMED // PROLINE-RICH RECEPTOR-LIKE PROTEIN KINASE PERK8	5633	Vu05	1898909	1904541	PF07714	PTHR27001,PTHR27001:SF132	2.7.11.1	0	GO:0006468,GO:0004672
Vung105836|c2_g1_i1	Vigun03g084100	Vigun03g084100.1	(1 of 50) PF00069//PF08263//PF13855 - Protein kinase domain (Pkinase) // Leucine rich repeat N-terminal domain (LRRNT_2) // Leucine rich repeat (LRR_8)	3419	Vu03	6982935	6986353	PF08263,PF13855,PF00069	PTHR27000,PTHR27000:SF66	2.7.11.1	0	GO:0005515,GO:0006468,GO:0005524,GO:0004672
Vung22899|c4_g2_i2	Vigun11g132200	Vigun11g132200.1	(1 of 3) K12449 - UDP-apiose/xylose synthase (AXS)	2869	Vu11	34083362	34086230	PF01073	PTHR10366,PTHR10366:SF348	4.1.1.35	K12449	GO:0055114,GO:0016616,GO:0006694,GO:0003854
Vung126470|c3_g1_i4	Vigun04g130300	Vigun04g130300.1	(1 of 3) 1.3.1.22 - 3-oxo-5-alpha-steroid 4-dehydrogenase (NADP(+)) / Cholestenone 5-alpha-reductase	2332	Vu04	32627747	32630078	PF02544	PTHR10556,PTHR10556:SF35	1.3.1.22	0	GO:0016627,GO:0016021,GO:0006629,GO:0005737
Vung113755|c0_g1_i1	Vigun03g120000	Vigun03g120000.1	(1 of 14) PF06749 - Protein of unknown function (DUF1218) (DUF1218)	1227	Vu03	11161536	11162762	PF06749	PTHR31769,PTHR31769:SF14	0	0	0
Vung14465|c2_g1_i7	Vigun05g288900	Vigun05g288900.1	(1 of 13) PTHR19241//PTHR19241:SF219 - ATP-BINDING CASSETTE TRANSPORTER // ABC TRANSPORTER G FAMILY MEMBER 38	1918	Vu05	47570807	47572724	0	PTHR19241,PTHR19241:SF219	0	0	0
Vung156865|c0_g1_i1	Vigun09g122200	Vigun09g122200.1	(1 of 2) PTHR31238//PTHR31238:SF3 - FAMILY NOT NAMED // GERMIN-LIKE PROTEIN SUBFAMILY 3 MEMBER 4	1262	Vu09	27285047	27286308	PF00190	PTHR31238,PTHR31238:SF3	0	0	GO:0045735
Vung134920|c2_g1_i2	Vigun05g011600	Vigun05g011600.1	(1 of 1) PTHR32227//PTHR32227:SF54 - FAMILY NOT NAMED // BETA-1, 3-GLUCANASE-LIKE PROTEIN-RELATED	2475	Vu05	936006	938480	PF07983,PF00332	PTHR32227,PTHR32227:SF54	3.2.1.39	0	GO:0005975,GO:0004553
Vung12112|c1_g3_i3	Vigun09g030300	Vigun09g030300.1	(1 of 155) PF00010 - Helix-loop-helix DNA-binding domain (HLH)	6480	Vu09	2503065	2509544	PF00010	PTHR31945,PTHR31945:SF9	0	0	GO:0046983
Vung143984|c3_g1_i7	Vigun07g005300	Vigun07g005300.1	(1 of 6) PF00045 - Hemopexin (Hemopexin)	2076	Vu07	419168	421243	PF00045	0	0	0	0
Vung105243|c2_g1_i11	Vigun11g073400	Vigun11g073400.1	(1 of 7) K15803 - (-)-germacrene D synthase (GERD)	5734	Vu11	20923555	20929288	PF01397,PF03936	PTHR31225,PTHR31225:SF15	4.2.3.22,4.2.3.75	K15803	GO:0016829,GO:0010333,GO:0008152,GO:0000287
Vung83335|c1_g1_i3	Vigun05g146200	Vigun05g146200.1	(1 of 23) PTHR33107:SF5 - KUNITZ FAMILY TRYPSIN AND PROTEASE INHIBITOR PROTEIN-RELATED	783	Vu05	20147906	20148688	PF00197	PTHR33107,PTHR33107:SF5	0	0	GO:0004866
Vung144523|c1_g2_i2	Vigun08g181100	Vigun08g181100.1	(1 of 3) PTHR11413//PTHR11413:SF57 - CYSTATIN FAMILY MEMBER // SUBFAMILY NOT NAMED	1584	Vu08	35064675	35066258	PF16845,PF00031	PTHR11413,PTHR11413:SF57	0	0	GO:0004869
Vung31455|c2_g2_i1	Vigun11g060800	Vigun11g060800.4	(1 of 4) PTHR13140:SF384 - MYOSIN-2	24159	Vu11	13342105	13366263	PF00612,PF00063	PTHR13140,PTHR13140:SF384	3.6.4.1	0	GO:0005515,GO:0016459,GO:0005524,GO:0003774
Vung10317|c0_g1_i1	Vigun01g009300	Vigun01g009300.1	(1 of 2) PTHR15907:SF35 - GENE1000 PROTEIN-RELATED	3415	Vu01	1084935	1088349	PF04749	PTHR15907,PTHR15907:SF35	0	0	0
Vung39842|c0_g1_i5	Vigun08g045400	Vigun08g045400.1	(1 of 4) PTHR31429:SF3 - WRKY TRANSCRIPTION FACTOR 40-RELATED	1839	Vu08	4795627	4797465	PF03106	PTHR31429,PTHR31429:SF3	0	0	GO:0043565,GO:0006355,GO:0003700
Vung150138|c2_g1_i8	Vigun05g253500	Vigun05g253500.1	(1 of 6) PTHR11177//PTHR11177:SF190 - CHITINASE // SUBFAMILY NOT NAMED	1196	Vu05	44812919	44814114	PF00704	PTHR11177,PTHR11177:SF190	3.2.1.14	0	GO:0005975,GO:0004553
Vung100020|c3_g2_i1	Vigun06g013600	Vigun06g013600.1	(1 of 3) K00423 - L-ascorbate oxidase (E1.10.3.3)	4473	Vu06	6272024	6276496	PF07731,PF07732,PF00394	PTHR11709,PTHR11709:SF97	1.10.3.3	K00423	GO:0055114,GO:0016491,GO:0005507
Vung130443|c3_g2_i5	Vigun02g192400	Vigun02g192400.1	(1 of 11) 1.3.1.42 - 12-oxophytodienoate reductase	1940	Vu02	32936077	32938016	PF00724	PTHR22893,PTHR22893:SF44	1.3.1.42	K05894	GO:0055114,GO:0016491,GO:0010181
Vung58127|c0_g2_i7	Vigun08g139300	Vigun08g139300.3	(1 of 8) K10706 - senataxin [EC:3.6.4.-] (SETX, ALS4)	5218	Vu08	31187276	31192493	PF13245,PF13087	PTHR10887,PTHR10887:SF358	0	K10706	0
Vung104044|c3_g1_i2	Vigun09g242000	Vigun09g242000.1	(1 of 138) KOG0156 - Cytochrome P450 CYP2 subfamily	1886	Vu09	41145950	41147835	PF00067	PTHR24298,PTHR24298:SF102	0	0	GO:0055114,GO:0020037,GO:0016705,GO:0005506
Vung89013|c0_g1_i1	Vigun03g252300	Vigun03g252300.1	(1 of 24) PF03087 - Arabidopsis protein of unknown function (DUF241)	1481	Vu03	41873445	41874925	PF03087	PTHR33070,PTHR33070:SF18	0	0	0
Vung76418|c1_g1_i1	Vigun01g140000	Vigun01g140000.1	(1 of 4) K13407 - fatty acid omega-hydroxylase (CYP94A1)	1685	Vu01	32065645	32067329	PF00067	PTHR24296,PTHR24296:SF11	0	K13407	GO:0055114,GO:0020037,GO:0016705,GO:0005506
Vung41349|c0_g4_i2	Vigun07g174700	Vigun07g174700.1	(1 of 3) PTHR11654//PTHR11654:SF73 - OLIGOPEPTIDE TRANSPORTER-RELATED // PROTEIN NRT1/ PTR FAMILY 5.2-RELATED	6529	Vu07	28999105	29005633	PF00854	PTHR11654,PTHR11654:SF73	0	0	GO:0016020,GO:0006810,GO:0005215
Vung20979|c1_g1_i1	Vigun08g172300	Vigun08g172300.1	(1 of 4) PTHR10209//PTHR10209:SF193 - OXIDOREDUCTASE, 2OG-FE II OXYGENASE FAMILY PROTEIN // 1-AMINOCYCLOPROPANE-1-CARBOXYLATE OXIDASE 3-RELATED	1651	Vu08	34322277	34323927	PF14226,PF03171	PTHR10209,PTHR10209:SF193	1.14.17.4	K05933	GO:0055114,GO:0016491
Vung105473|c2_g3_i11	Vigun04g179200	Vigun04g179200.1	(1 of 138) KOG0156 - Cytochrome P450 CYP2 subfamily	1932	Vu04	40274983	40276914	PF00067	PTHR24298,PTHR24298:SF111	0	0	GO:0055114,GO:0020037,GO:0016705,GO:0005506
Vung10857|c2_g1_i3	Vigun06g161100	Vigun06g161100.1	(1 of 2) 1.8.4.10 - Adenylyl-sulfate reductase (thioredoxin) / Thioredoxin-dependent 5'-adenylylsulfate reductase	3158	Vu06	28338219	28341376	PF00085,PF01507	PTHR23293,PTHR23293:SF11	1.8.4.10	K05907	GO:0045454,GO:0008152,GO:0003824
Vung41942|c1_g2_i3	Vigun04g154000	Vigun04g154000.1	(1 of 3) 6.2.1.8 - Oxalate--CoA ligase / Oxalyl-CoA synthetase	4281	Vu04	37243148	37247428	PF13193,PF00501	PTHR24095,PTHR24095:SF171	6.2.1.8	0	GO:0008152,GO:0003824
Vung47464|c4_g4_i1	Vigun07g202000	Vigun07g202000.1	(1 of 6) PTHR19139//PTHR19139:SF167 - AQUAPORIN TRANSPORTER // AQUAPORIN PIP2-1-RELATED	2874	Vu07	32333846	32336719	PF00230	PTHR19139,PTHR19139:SF167	0	K09872	GO:0016020,GO:0006810,GO:0005215
Vung25920|c1_g1_i1	Vigun06g165400	Vigun06g165400.1	(1 of 8) PTHR13683//PTHR13683:SF268 - ASPARTYL PROTEASES // EUKARYOTIC ASPARTYL PROTEASE FAMILY PROTEIN	1720	Vu06	28725861	28727580	PF14543,PF14541	PTHR13683,PTHR13683:SF268	3.4.23.12	0	GO:0006508,GO:0004190
Vung144868|c2_g2_i5	Vigun10g044600	Vigun10g044600.1	(1 of 2) K17961 - cytochrome P450, family 82, subfamily G, polypeptide 1 (CYP82G1)	3422	Vu10	6472833	6476254	PF00067	PTHR24298,PTHR24298:SF74	0	K17961	GO:0055114,GO:0020037,GO:0016705,GO:0005506
Vung8032|c1_g1_i3	Vigun04g048000	Vigun04g048000.1	(1 of 2) PTHR23070:SF44 - AAA-TYPE ATPASE FAMILY PROTEIN-RELATED	1819	Vu04	4137980	4139798	PF00004,PF14363	PTHR23070,PTHR23070:SF44	0	K08900	GO:0005524
Vung75625|c0_g4_i4	Vigun11g142800	Vigun11g142800.1	(1 of 2) PTHR18929:SF74 - PROTEIN DISULFIDE-ISOMERASE A3	3778	Vu11	35238152	35241929	PF13848,PF00085	PTHR18929,PTHR18929:SF74	5.3.4.1	K09580	GO:0045454
Vung30568|c0_g1_i2	Vigun06g147800	Vigun06g147800.1	0	780	Vu06	27282153	27282932	0	0	0	0	0
Vung44038|c4_g2_i4	Vigun08g173000	Vigun08g173000.1	(1 of 6) PTHR10795//PTHR10795:SF365 - PROPROTEIN CONVERTASE SUBTILISIN/KEXIN // SUBFAMILY NOT NAMED	4853	Vu08	34376555	34381407	PF02225,PF05922,PF00082	PTHR10795,PTHR10795:SF365	3.4.14.10	0	GO:0006508,GO:0004252
Vung109336|c9_g4_i2	Vigun03g400000	Vigun03g400000.1	(1 of 2) PTHR31384:SF21 - AUXIN RESPONSE FACTOR 19-RELATED	7626	Vu03	60647730	60655355	PF02309,PF02362,PF06507	PTHR31384,PTHR31384:SF21	0	0	GO:0006355,GO:0005634,GO:0003677,GO:0009725
Vung146446|c2_g3_i6	Vigun10g173700	Vigun10g173700.1	(1 of 5) PTHR23421//PTHR23421:SF74 - BETA-GALACTOSIDASE RELATED // BETA-GALACTOSIDASE 1	6755	Vu10	39228881	39235635	PF02140,PF01301	PTHR23421,PTHR23421:SF74	3.2.1.23	0	GO:0030246,GO:0005975,GO:0004553
Vung47861|c0_g1_i1	Vigun05g021700	Vigun05g021700.1	(1 of 3) 5.3.99.6 - Allene-oxide cyclase	1516	Vu05	1796507	1798022	PF06351	PTHR31843,PTHR31843:SF2	5.3.99.6	K10525	GO:0016853,GO:0009507
Vung6311|c1_g1_i1	Vigun06g228000	Vigun06g228000.1	(1 of 4) 4.1.1.22 - Histidine decarboxylase / L-histidine carboxy-lyase	4560	Vu06	33548869	33553428	PF00282	PTHR11999,PTHR11999:SF83	4.1.1.22	K01590	GO:0030170,GO:0019752,GO:0016831
Vung138657|c2_g1_i9	Vigun04g126400	Vigun04g126400.1	(1 of 3) 4.4.1.4 - Alliin lyase / L-cysteine sulfoxide lyase	4708	Vu04	31908629	31913336	PF04863,PF04864	PTHR11751,PTHR11751:SF126	4.4.1.4	0	GO:0016846
Vung61120|c2_g2_i15	Vigun11g217400	Vigun11g217400.1	(1 of 3) PTHR22953:SF22 - PURPLE ACID PHOSPHATASE 10	2855	Vu11	41090641	41093495	PF16656,PF14008,PF00149	PTHR22953,PTHR22953:SF22	3.1.3.2	0	GO:0016787
Vung76372|c2_g1_i13	Vigun10g003400	Vigun10g003400.1	(1 of 18) PF00069//PF00954//PF01453 - Protein kinase domain (Pkinase) // S-locus glycoprotein domain (S_locus_glycop) // D-mannose binding lectin (B_lectin)	2922	Vu10	291770	294691	PF00954,PF01453,PF00069	PTHR27002,PTHR27002:SF136	2.7.11.1	0	GO:0048544,GO:0006468,GO:0005524,GO:0004672
Vung105473|c2_g3_i4	Vigun04g179300	Vigun04g179300.1	(1 of 138) KOG0156 - Cytochrome P450 CYP2 subfamily	2588	Vu04	40293822	40296409	PF00067	PTHR24298,PTHR24298:SF111	0	0	GO:0055114,GO:0020037,GO:0016705,GO:0005506
Vung131345|c4_g7_i17	Vigun03g140400	Vigun03g140400.1	(1 of 46) 1.3.3.8 - Tetrahydroberberine oxidase / THB oxidase	1542	Vu03	13949800	13951341	PF08031	PTHR32448	1.3.3.8	0	GO:0055114,GO:0050660,GO:0016491
Vung31455|c2_g2_i4	Vigun05g198800	Vigun05g198800.1	(1 of 4) PTHR13140:SF384 - MYOSIN-2	10844	Vu05	38467570	38478413	PF02736,PF00612,PF00063	PTHR13140,PTHR13140:SF384	3.6.4.1	K10357	GO:0016459,GO:0005524,GO:0003774,GO:0005515
Vung37144|c1_g1_i1	Vigun08g102200	Vigun08g102200.1	(1 of 4) PTHR11926//PTHR11926:SF286 - GLUCOSYL/GLUCURONOSYL TRANSFERASES // SUBFAMILY NOT NAMED	2577	Vu08	25308958	25311534	PF00201	PTHR11926,PTHR11926:SF286	2.4.1.324	0	GO:0016758,GO:0008152
Vung20979|c1_g1_i6	Vigun08g172300	Vigun08g172300.1	(1 of 4) PTHR10209//PTHR10209:SF193 - OXIDOREDUCTASE, 2OG-FE II OXYGENASE FAMILY PROTEIN // 1-AMINOCYCLOPROPANE-1-CARBOXYLATE OXIDASE 3-RELATED	1651	Vu08	34322277	34323927	PF14226,PF03171	PTHR10209,PTHR10209:SF193	1.14.17.4	K05933	GO:0055114,GO:0016491
Vung95557|c0_g3_i7	Vigun05g019700	Vigun05g019700.2	(1 of 16) K13457 - disease resistance protein RPM1 (RPM1, RPS3)	4192	Vu05	1600222	1604413	PF00931	PTHR23155,PTHR23155:SF402	0	K13457	GO:0043531
Vung136136|c0_g1_i1	Vigun08g199900	Vigun08g199900.1	0	831	Vu08	36465539	36466369	0	0	0	0	0
Vung137817|c0_g1_i6	Vigun03g236900	Vigun03g236900.1	(1 of 19) PF03181 - BURP domain (BURP)	2552	Vu03	39436154	39438705	PF03181	PTHR31458,PTHR31458:SF2	0	0	0
Vung9337|c2_g2_i2	Vigun04g203000	Vigun04g203000.2	(1 of 1) PTHR11937//PTHR11937:SF218 - ACTIN // SUBFAMILY NOT NAMED	2841	Vu04	42571604	42574444	PF00022	PTHR11937,PTHR11937:SF218	0	K10355	0
Vung119212|c4_g1_i7	Vigun05g030500	Vigun05g030500.1	(1 of 4) PTHR31673:SF3 - COBRA-LIKE EXTRACELLULAR GLYCOSYL-PHOSPHATIDYL INOSITOL-ANCHORED FAMILY PROTEIN-RELATED	2882	Vu05	2422972	2425853	PF04833	PTHR31673,PTHR31673:SF3	0	0	GO:0031225,GO:0016049,GO:0010215
Vung12792|c0_g1_i2	Vigun03g127000	Vigun03g127000.1	0	951	Vu03	12255722	12256672	0	0	0	0	0
Vung61005|c0_g1_i4	Vigun11g074400	Vigun11g074400.1	(1 of 58) PF03514 - GRAS domain family (GRAS)	3770	Vu11	21666361	21670130	PF03514	PTHR31636,PTHR31636:SF18	0	0	0
Vung29573|c1_g1_i11	Vigun03g111000	Vigun03g111000.1	(1 of 6) PTHR10992//PTHR10992:SF869 - ALPHA/BETA HYDROLASE FOLD-CONTAINING PROTEIN // SUBFAMILY NOT NAMED	2359	Vu03	10033440	10035798	PF00561	PTHR10992,PTHR10992:SF869	3.3.2.10	0	0
Vung87446|c2_g2_i4	Vigun07g272800	Vigun07g272800.1	(1 of 6) PTHR21576//PTHR21576:SF40 - UNCHARACTERIZED NODULIN-LIKE PROTEIN // SUBFAMILY NOT NAMED	2220	Vu07	38829952	38832171	PF06813	PTHR21576,PTHR21576:SF40	0	0	0
Vung512|c9_g2_i2	Vigun03g384600	Vigun03g384600.1	(1 of 14) K01535 - H+-transporting ATPase (E3.6.3.6)	6968	Vu03	58975633	58982600	PF00690,PF00702,PF00122	PTHR24093,PTHR24093:SF361	3.6.3.6	K01535	GO:0046872,GO:0000166
Vung37871|c1_g1_i3	Vigun03g111900	Vigun03g111900.1	(1 of 3) 1.10.3.1//1.14.18.1 - Catechol oxidase / Tyrosinase // Tyrosinase / Tyrosine-dopa oxidase	2218	Vu03	10165487	10167704	PF12142,PF00264,PF12143	PTHR11474,PTHR11474:SF33	1.14.18.1,1.10.3.1	0	GO:0055114,GO:0004097,GO:0016491,GO:0008152
Vung74207|c2_g2_i3	Vigun03g264500	Vigun03g264500.1	(1 of 3) 2.1.1.274 - Salicylate carboxymethyltransferase / Salicylate O-methyltransferase	2640	Vu03	43356002	43358641	PF03492	PTHR31009,PTHR31009:SF6	2.1.1.274	K08241	GO:0008168
Vung81|c2_g1_i2	Vigun11g096900	Vigun11g096900.1	(1 of 18) PTHR11746//PTHR11746:SF83 - O-METHYLTRANSFERASE // SUBFAMILY NOT NAMED	1770	Vu11	28321403	28323172	PF08100,PF00891	PTHR11746,PTHR11746:SF83	0	0	GO:0046983,GO:0008171
Vung33807|c3_g1_i2	Vigun03g012000	Vigun03g012000.1	(1 of 2) K15305 - vacuole morphology and inheritance protein 14 (VAC14, TAX1BP2)	8320	Vu03	808881	817200	PF02985,PF11916	PTHR16023,PTHR16023:SF0	0	K15305	GO:0005515,GO:0070772,GO:0043550
Vung155013|c0_g1_i1	Vigun07g252800	Vigun07g252800.1	(1 of 2) PTHR26374:SF208 - ZINC FINGER PROTEIN AZF3-RELATED	1211	Vu07	37170245	37171455	PF13912	PTHR26374,PTHR26374:SF208	0	0	0
Vung131345|c4_g7_i5	Vigun03g139800	Vigun03g139800.1	(1 of 46) 1.3.3.8 - Tetrahydroberberine oxidase / THB oxidase	2277	Vu03	13818502	13820778	PF08031,PF01565	PTHR32448	1.3.3.8	0	GO:0055114,GO:0050660,GO:0016491
Vung101179|c0_g1_i3	Vigun11g173600	Vigun11g173600.1	(1 of 5) PTHR23500//PTHR23500:SF109 - FAMILY NOT NAMED // POLYOL TRANSPORTER 5	2367	Vu11	37887571	37889937	PF00083	PTHR23500,PTHR23500:SF109	0	0	GO:0055085,GO:0022857,GO:0016021
Vung124834|c4_g1_i1	Vigun05g288800	Vigun05g288800.1	(1 of 14) 3.6.3.25 - Sulfate-transporting ATPase	3648	Vu05	47567159	47570806	PF00005,PF01061	PTHR19241,PTHR19241:SF219	3.6.3.25	0	GO:0016887,GO:0005524,GO:0016020
Vung102629|c3_g1_i3	Vigun03g273100	Vigun03g273100.1	(1 of 2) PTHR11709//PTHR11709:SF26 - MULTI-COPPER OXIDASE // SUBFAMILY NOT NAMED	2898	Vu03	44843245	44846142	PF07731,PF07732,PF00394	PTHR11709,PTHR11709:SF26	1.10.3.3	0	GO:0055114,GO:0016491,GO:0005507
Vung158880|c0_g1_i1	Vigun05g021000	Vigun05g021000.1	(1 of 190) PF00847 - AP2 domain (AP2)	3173	Vu05	1760967	1764139	PF00847	PTHR31190	0	0	GO:0006355,GO:0003700
Vung84947|c1_g1_i3	Vigun05g079200	Vigun05g079200.1	(1 of 2) K18442 - brefeldin A-inhibited guanine nucleotide-exchange protein (ARFGEF, BIG)	13870	Vu05	7401804	7415673	PF16206,PF09324,PF16213,PF12783,PF01369	PTHR10663,PTHR10663:SF42	0	K18442	GO:0032012,GO:0005086
Vung37871|c1_g1_i2	Vigun03g111900	Vigun03g111900.1	(1 of 3) 1.10.3.1//1.14.18.1 - Catechol oxidase / Tyrosinase // Tyrosinase / Tyrosine-dopa oxidase	2218	Vu03	10165487	10167704	PF12142,PF00264,PF12143	PTHR11474,PTHR11474:SF33	1.14.18.1,1.10.3.1	0	GO:0055114,GO:0004097,GO:0016491,GO:0008152
Vung46971|c0_g1_i1	Vigun09g263200	Vigun09g263200.1	(1 of 2) K16290 - xylem cysteine proteinase [EC:3.4.22.-] (XCP)	1577	Vu09	42759939	42761515	PF08246,PF00112	PTHR12411,PTHR12411:SF357	3.4.22.6	K16290	GO:0008234,GO:0006508
Vung166315|c2_g2_i1	Vigun05g249600	Vigun05g249600.1	(1 of 1) 3.2.1.145//3.2.1.23 - Galactan 1,3-beta-galactosidase // Beta-galactosidase / Lactase	6630	Vu05	44339927	44346556	PF02140,PF01301	PTHR23421,PTHR23421:SF58	3.2.1.145,3.2.1.23	0	GO:0030246,GO:0005975,GO:0004553
Vung52936|c1_g1_i6	Vigun04g059300	Vigun04g059300.1	(1 of 3) PTHR11926//PTHR11926:SF289 - GLUCOSYL/GLUCURONOSYL TRANSFERASES // SUBFAMILY NOT NAMED	3937	Vu04	5963223	5967159	PF00201	PTHR11926,PTHR11926:SF289	2.4.1.203	0	GO:0016758,GO:0008152
Vung119212|c4_g1_i1	Vigun05g030500	Vigun05g030500.1	(1 of 4) PTHR31673:SF3 - COBRA-LIKE EXTRACELLULAR GLYCOSYL-PHOSPHATIDYL INOSITOL-ANCHORED FAMILY PROTEIN-RELATED	2882	Vu05	2422972	2425853	PF04833	PTHR31673,PTHR31673:SF3	0	0	GO:0031225,GO:0016049,GO:0010215
Vung108039|c6_g2_i1	Vigun10g071900	Vigun10g071900.1	0	1731	Vu10	17834834	17836564	0	0	0	0	0
Vung52936|c1_g1_i7	Vigun04g059300	Vigun04g059300.1	(1 of 3) PTHR11926//PTHR11926:SF289 - GLUCOSYL/GLUCURONOSYL TRANSFERASES // SUBFAMILY NOT NAMED	3937	Vu04	5963223	5967159	PF00201	PTHR11926,PTHR11926:SF289	2.4.1.203	0	GO:0016758,GO:0008152
Vung58318|c5_g1_i1	Vigun05g143700	Vigun05g143700.1	(1 of 23) PTHR33107:SF5 - KUNITZ FAMILY TRYPSIN AND PROTEASE INHIBITOR PROTEIN-RELATED	803	Vu05	19335261	19336063	PF00197	PTHR33107,PTHR33107:SF5	0	0	GO:0004866
Vung512|c9_g2_i1	Vigun09g026200	Vigun09g026200.1	(1 of 14) K01535 - H+-transporting ATPase (E3.6.3.6)	7707	Vu09	2052870	2060576	PF00690,PF00702,PF00122	PTHR24093,PTHR24093:SF361	3.6.3.6	K01535	GO:0046872,GO:0000166
Vung130443|c3_g2_i11	Vigun02g192600	Vigun02g192600.1	(1 of 11) 1.3.1.42 - 12-oxophytodienoate reductase	1934	Vu02	32946635	32948568	PF00724	PTHR22893,PTHR22893:SF44	1.3.1.42	K05894	GO:0055114,GO:0016491,GO:0010181
Vung163626|c3_g1_i1	Vigun03g406700	Vigun03g406700.1	(1 of 10) PTHR24221//PTHR24221:SF205 - FAMILY NOT NAMED // ABC TRANSPORTER B FAMILY MEMBER 11-RELATED	5884	Vu03	61385923	61391806	PF00005,PF00664	PTHR24221,PTHR24221:SF205	3.6.3.44	K05658	GO:0016887,GO:0005524,GO:0055085,GO:0042626,GO:0016021,GO:0006810
Vung108558|c0_g1_i1	Vigun09g158400	Vigun09g158400.1	0	737	Vu09	32511186	32511922	0	0	0	0	0
Vung166470|c7_g3_i6	Vigun04g059000	Vigun04g059000.1	(1 of 5) 2.4.1.85 - Cyanohydrin beta-glucosyltransferase / Uridine diphosphoglucose:aldehyde cyanohydrin beta-glucosyltransferase	1861	Vu04	5898109	5899969	PF00201	PTHR11926,PTHR11926:SF162	2.4.1.85	0	GO:0016758,GO:0008152
Vung149823|c1_g2_i1	Vigun06g096900	Vigun06g096900.1	(1 of 3) PTHR12526//PTHR12526:SF379 - GLYCOSYLTRANSFERASE // SUCROSE SYNTHASE 5	4655	Vu06	22817462	22822116	PF00534,PF00862	PTHR12526,PTHR12526:SF379	2.4.1.13	K00695	GO:0016157,GO:0005985
Vung57799|c6_g4_i4	Vigun06g109700	Vigun06g109700.1	(1 of 12) 2.3.1.196 - Benzyl alcohol O-benzoyltransferase	2037	Vu06	23880716	23882752	PF02458	PTHR31642,PTHR31642:SF9	2.3.1.196	0	GO:0016747
Vung160428|c4_g3_i1	Vigun03g219700	Vigun03g219700.2	(1 of 2) PTHR10108//PTHR10108:SF907 - METHYLTRANSFERASE // METHYLTRANSFERASE PMT20-RELATED	4152	Vu03	36536480	36540631	PF03141	PTHR10108,PTHR10108:SF907	2.1.1.41	0	GO:0008168
Vung14465|c2_g1_i2	Vigun05g289000	Vigun05g289000.1	(1 of 20) PF14510 - ABC-transporter extracellular N-terminal (ABC_trans_N)	719	Vu05	47572911	47573629	PF14510	0	0	0	0
Vung3901|c0_g1_i3	Vigun07g005800	Vigun07g005800.1	0	988	Vu07	460045	461032	0	0	0	0	0
Vung51206|c2_g1_i7	Vigun04g173000	Vigun04g173000.1	(1 of 55) PF03140 - Plant protein of unknown function (DUF247)	2017	Vu04	39699238	39701254	PF03140	PTHR31549,PTHR31549:SF23	0	0	0
Vung52592|c1_g1_i2	Vigun05g288800	Vigun05g288800.1	(1 of 14) 3.6.3.25 - Sulfate-transporting ATPase	3648	Vu05	47567159	47570806	PF00005,PF01061	PTHR19241,PTHR19241:SF219	3.6.3.25	0	GO:0016887,GO:0005524,GO:0016020
Vung20192|c1_g1_i4	Vigun09g024800	Vigun09g024800.1	(1 of 1298) 2.7.11.1 - Non-specific serine/threonine protein kinase / Threonine-specific protein kinase	3743	Vu09	1952274	1956016	PF07714	PTHR27001,PTHR27001:SF34	2.7.11.1	0	GO:0006468,GO:0004672
Vung158139|c1_g1_i1	Vigun09g084400	Vigun09g084400.1	(1 of 24) PF08263//PF13855 - Leucine rich repeat N-terminal domain (LRRNT_2) // Leucine rich repeat (LRR_8)	1327	Vu09	10648569	10649895	PF08263,PF13855	PTHR27000,PTHR27000:SF225	0	0	GO:0005515
Vung122111|c3_g2_i2	Vigun05g035500	Vigun05g035500.1	(1 of 5) 2.4.1.85 - Cyanohydrin beta-glucosyltransferase / Uridine diphosphoglucose:aldehyde cyanohydrin beta-glucosyltransferase	3056	Vu05	2891774	2894829	PF00201	PTHR11926,PTHR11926:SF265	2.4.1.85	0	GO:0016758,GO:0008152
Vung44038|c4_g1_i3	Vigun08g173000	Vigun08g173000.1	(1 of 6) PTHR10795//PTHR10795:SF365 - PROPROTEIN CONVERTASE SUBTILISIN/KEXIN // SUBFAMILY NOT NAMED	4853	Vu08	34376555	34381407	PF02225,PF05922,PF00082	PTHR10795,PTHR10795:SF365	3.4.14.10	0	GO:0006508,GO:0004252
Vung23234|c2_g1_i3	Vigun01g227800	Vigun01g227800.1	(1 of 7) PTHR27003//PTHR27003:SF102 - FAMILY NOT NAMED // SERINE/THREONINE-PROTEIN KINASE-LIKE PROTEIN CCR3-RELATED	1260	Vu01	40035479	40036738	PF07714	PTHR27003,PTHR27003:SF102	2.7.11.1	0	GO:0006468,GO:0004672
Vung166315|c2_g2_i7	Vigun05g249600	Vigun05g249600.1	(1 of 1) 3.2.1.145//3.2.1.23 - Galactan 1,3-beta-galactosidase // Beta-galactosidase / Lactase	6630	Vu05	44339927	44346556	PF02140,PF01301	PTHR23421,PTHR23421:SF58	3.2.1.145,3.2.1.23	0	GO:0030246,GO:0005975,GO:0004553
Vung28147|c1_g2_i1	Vigun09g043700	Vigun09g043700.1	(1 of 3) K02881 - large subunit ribosomal protein L18 (RP-L18, MRPL18, rplR)	2198	Vu09	4092169	4094366	PF00861	PTHR12899	0	K02881	GO:0006412,GO:0005840,GO:0005622,GO:0003735
Vung156259|c2_g1_i1	Vigun02g189900	Vigun02g189900.1	(1 of 2) PTHR24096:SF169 - 4-COUMARATE--COA LIGASE 3	4257	Vu02	32767087	32771343	PF13193,PF00501	PTHR24096,PTHR24096:SF169	6.2.1.34,6.2.1.12	K01904	GO:0008152,GO:0003824
Vung110313|c0_g1_i1	Vigun04g173100	Vigun04g173100.1	(1 of 55) PF03140 - Plant protein of unknown function (DUF247)	1959	Vu04	39706759	39708717	PF03140	PTHR31549,PTHR31549:SF23	0	0	0
Vung14688|c0_g3_i2	Vigun07g115800	Vigun07g115800.1	(1 of 37) 4.2.99.18 - DNA-(apurinic or apyrimidinic site) lyase / Phage-T4 UV endonuclease	477	Vu07	21405674	21406150	PF06839	0	4.2.99.18	0	GO:0008270
Vung27777|c1_g1_i1	Vigun01g140800	Vigun01g140800.1	(1 of 42) PF13912 - C2H2-type zinc finger (zf-C2H2_6)	749	Vu01	32167449	32168197	PF13912	PTHR26374,PTHR26374:SF172	0	0	0
Vung42876|c0_g1_i1	Vigun10g022400	Vigun10g022400.1	(1 of 8) K07119 - uncharacterized protein (K07119)	3161	Vu10	2649415	2652575	PF00107,PF16884	PTHR11695,PTHR11695:SF504	1.3.1.74	K07119	GO:0055114,GO:0016491,GO:0008270
Vung93438|c4_g4_i1	VigunL067800	VigunL067800.1	0	931	contig_5	471531	472461	0	0	0	0	0
Vung133102|c1_g1_i1	Vigun05g182500	Vigun05g182500.1	(1 of 2) 3.4.19.9 - Gamma-glutamyl hydrolase / Pteroyl-poly-alpha-glutamate hydrolase	3898	Vu05	35047276	35051173	PF07722	PTHR11315	3.4.19.9	K01307	GO:0016787,GO:0006541,GO:0008242,GO:0003824
Vung9716|c1_g1_i1	Vigun08g098500	Vigun08g098500.1	(1 of 8) PTHR31657//PTHR31657:SF9 - FAMILY NOT NAMED // ETHYLENE-RESPONSIVE TRANSCRIPTION FACTOR CRF5-RELATED	1885	Vu08	23887727	23889611	PF00847	PTHR31657,PTHR31657:SF9	0	K09286	GO:0006355,GO:0003700
Vung24706|c0_g1_i1	Vigun11g118300	Vigun11g118300.1	0	1103	Vu11	32437778	32438880	0	0	0	0	0
Vung102629|c1_g2_i1	Vigun02g140500	Vigun02g140500.2	(1 of 2) PTHR11709//PTHR11709:SF26 - MULTI-COPPER OXIDASE // SUBFAMILY NOT NAMED	3550	Vu02	28935072	28938621	PF07731,PF07732,PF00394	PTHR11709,PTHR11709:SF26	1.10.3.3	0	GO:0055114,GO:0016491,GO:0005507
Vung99985|c0_g1_i1	Vigun11g056400	Vigun11g056400.2	(1 of 6) K01595 - phosphoenolpyruvate carboxylase (ppc)	7430	Vu11	11081606	11089035	PF00311	PTHR30523,PTHR30523:SF8	4.1.1.31	K01595	GO:0015977,GO:0008964,GO:0006099
Vung124834|c4_g5_i5	Vigun05g288800	Vigun05g288800.1	(1 of 14) 3.6.3.25 - Sulfate-transporting ATPase	3648	Vu05	47567159	47570806	PF00005,PF01061	PTHR19241,PTHR19241:SF219	3.6.3.25	0	GO:0016887,GO:0005524,GO:0016020
Vung118004|c1_g1_i2	Vigun01g088500	Vigun01g088500.1	0	3175	Vu01	24689992	24693166	0	0	0	0	0
Vung72301|c0_g1_i1	Vigun03g140800	Vigun03g140800.1	(1 of 46) 1.3.3.8 - Tetrahydroberberine oxidase / THB oxidase	2031	Vu03	14048370	14050400	PF08031,PF01565	PTHR32448	1.3.3.8	0	GO:0055114,GO:0050660,GO:0016491
Vung15699|c4_g2_i2	Vigun01g057800	Vigun01g057800.1	(1 of 7) 3.2.2.20 - DNA-3-methyladenine glycosylase I / DNA-3-methyladenine glycosidase I	2738	Vu01	11612514	11615251	PF03352	PTHR31116,PTHR31116:SF6	3.2.2.20	K01246	GO:0008725,GO:0006284
Vung66783|c2_g2_i1	Vigun05g249600	Vigun05g249600.1	(1 of 1) 3.2.1.145//3.2.1.23 - Galactan 1,3-beta-galactosidase // Beta-galactosidase / Lactase	6630	Vu05	44339927	44346556	PF02140,PF01301	PTHR23421,PTHR23421:SF58	3.2.1.145,3.2.1.23	0	GO:0030246,GO:0005975,GO:0004553
Vung160925|c0_g2_i2	Vigun11g118300	Vigun11g118300.1	0	1103	Vu11	32437778	32438880	0	0	0	0	0
Vung57799|c6_g2_i1	Vigun06g109700	Vigun06g109700.1	(1 of 12) 2.3.1.196 - Benzyl alcohol O-benzoyltransferase	2037	Vu06	23880716	23882752	PF02458	PTHR31642,PTHR31642:SF9	2.3.1.196	0	GO:0016747
Vung121788|c5_g1_i1	Vigun10g135000	Vigun10g135000.1	(1 of 2) 2.1.1.53 - Putrescine N-methyltransferase	4345	Vu10	34609586	34613930	PF05056	PTHR33103,PTHR33103:SF4	2.1.1.53	0	0
Vung137134|c2_g4_i6	Vigun10g052700	Vigun10g052700.3	(1 of 2) K00761 - uracil phosphoribosyltransferase (upp, UPRT)	11495	Vu10	8602536	8614030	PF00156	PTHR10285,PTHR10285:SF77	2.4.2.9	0	GO:0009116
Vung121144|c0_g1_i1	Vigun10g056700	Vigun10g056700.1	(1 of 18) PTHR24298//PTHR24298:SF61 - FAMILY NOT NAMED // CYTOCHROME P450 81D1-RELATED	2375	Vu10	10433929	10436303	PF00067	PTHR24298,PTHR24298:SF61	0	0	GO:0055114,GO:0020037,GO:0016705,GO:0005506
Vung156308|c0_g1_i1	Vigun09g234400	Vigun09g234400.1	0	267	Vu09	40498363	40498629	0	0	0	0	0
Vung44085|c7_g2_i1	Vigun04g049000	Vigun04g049000.1	0	2002	Vu04	4265874	4267875	0	0	0	0	0
Vung91408|c0_g1_i1	Vigun07g024000	Vigun07g024000.2	(1 of 2) PTHR32285//PTHR32285:SF22 - FAMILY NOT NAMED // PROTEIN TRICHOME BIREFRINGENCE-RELATED	3504	Vu07	2124118	2127621	PF14416,PF13839	PTHR32285,PTHR32285:SF22	0	0	0
Vung113537|c1_g4_i1	Vigun04g138800	Vigun04g138800.1	(1 of 11) 2.7.11.1//3.2.1.15 - Non-specific serine/threonine protein kinase / Threonine-specific protein kinase // Polygalacturonase / Pectinase	3558	Vu04	34499146	34502703	PF00560,PF13855	PTHR27004,PTHR27004:SF13	2.7.11.1,3.2.1.15	0	GO:0005515
Vung24729|c2_g4_i2	Vigun07g202000	Vigun07g202000.1	(1 of 6) PTHR19139//PTHR19139:SF167 - AQUAPORIN TRANSPORTER // AQUAPORIN PIP2-1-RELATED	2874	Vu07	32333846	32336719	PF00230	PTHR19139,PTHR19139:SF167	0	K09872	GO:0016020,GO:0006810,GO:0005215
Vung119086|c2_g1_i4	Vigun07g005800	Vigun07g005800.1	0	988	Vu07	460045	461032	0	0	0	0	0
Vung160428|c4_g1_i1	Vigun02g101500	Vigun02g101500.3	(1 of 1) PTHR10108:SF844 - METHYLTRANSFERASE PMT21-RELATED	5007	Vu02	25615231	25620237	PF03141	PTHR10108,PTHR10108:SF844	2.1.1.41	0	GO:0008168
Vung83156|c2_g1_i4	Vigun10g022400	Vigun10g022400.1	(1 of 8) K07119 - uncharacterized protein (K07119)	3161	Vu10	2649415	2652575	PF00107,PF16884	PTHR11695,PTHR11695:SF504	1.3.1.74	K07119	GO:0055114,GO:0016491,GO:0008270
Vung146985|c0_g1_i1	Vigun03g251500	Vigun03g251500.1	(1 of 1) PTHR21152//PTHR21152:SF1 - AMINOTRANSFERASE CLASS V // PHOSPHOSERINE AMINOTRANSFERASE	5949	Vu03	41769964	41775912	PF00266	PTHR21152,PTHR21152:SF1	2.6.1.52	K00831	0
Vung130619|c1_g4_i1	Vigun03g175600	Vigun03g175600.1	0	1280	Vu03	21720950	21722229	0	0	0	0	0
Vung29875|c0_g1_i8	Vigun04g147500	Vigun04g147500.1	(1 of 7) PTHR22814//PTHR22814:SF129 - COPPER TRANSPORT PROTEIN ATOX1-RELATED // COPPER TRANSPORT FAMILY PROTEIN-RELATED	957	Vu04	36300410	36301366	PF00403	PTHR22814,PTHR22814:SF129	0	0	GO:0046872,GO:0030001
Vung118820|c0_g1_i1	Vigun07g174400	Vigun07g174400.2	0	1634	Vu07	28955784	28957417	0	PTHR39110	0	0	0
Vung162631|c1_g2_i1	Vigun05g013300	Vigun05g013300.1	(1 of 5) PTHR19375:SF232 - MEDIATOR OF RNA POLYMERASE II TRANSCRIPTION SUBUNIT 37E-RELATED	3014	Vu05	1053294	1056307	PF00012	PTHR19375,PTHR19375:SF232	0	K03283	0
Vung130619|c2_g4_i2	Vigun03g175600	Vigun03g175600.1	0	1280	Vu03	21720950	21722229	0	0	0	0	0
Vung160835|c0_g1_i1	Vigun03g127000	Vigun03g127000.1	0	951	Vu03	12255722	12256672	0	0	0	0	0
Vung92125|c0_g1_i1	Vigun03g261600	Vigun03g261600.1	0	922	Vu03	42857968	42858889	0	0	0	0	0
Vung160925|c0_g2_i1	Vigun11g118300	Vigun11g118300.1	0	1103	Vu11	32437778	32438880	0	0	0	0	0
Vung24706|c0_g3_i1	Vigun11g118300	Vigun11g118300.1	0	1103	Vu11	32437778	32438880	0	0	0	0	0
Vung166470|c7_g1_i1	Vigun04g059500	Vigun04g059500.1	(1 of 3) PTHR11926//PTHR11926:SF289 - GLUCOSYL/GLUCURONOSYL TRANSFERASES // SUBFAMILY NOT NAMED	2073	Vu04	5998878	6000950	PF00201	PTHR11926,PTHR11926:SF289	2.4.1.203	0	GO:0016758,GO:0008152
Vung12856|c0_g1_i1	Vigun06g224300	Vigun06g224300.1	(1 of 2) PTHR31235//PTHR31235:SF27 - FAMILY NOT NAMED // PEROXIDASE 62-RELATED	1336	Vu06	33283178	33284513	PF00141	PTHR31235,PTHR31235:SF27	1.11.1.7	K00430	GO:0055114,GO:0020037,GO:0006979,GO:0004601
Vung26533|c0_g1_i1	Vigun06g000200	Vigun06g000200.1	0	213	Vu06	37085	37297	0	0	0	0	0
Vung102878|c3_g1_i4	Vigun02g139300	Vigun02g139300.1	0	1983	Vu02	28853582	28855564	0	0	0	0	0
Vung147402|c1_g1_i1	Vigun03g449400	Vigun03g449400.2	(1 of 3) PTHR31384//PTHR31384:SF28 - FAMILY NOT NAMED // AUXIN RESPONSE FACTOR 1	2728	Vu03	65049409	65052136	PF06507	PTHR31384,PTHR31384:SF28	0	0	GO:0009725,GO:0006355,GO:0005634,GO:0003677
Vung32604|c1_g2_i3	Vigun03g207700	Vigun03g207700.1	(1 of 3) PTHR11240:SF19 - F7A19.32 PROTEIN-RELATED	2006	Vu03	33991000	33993005	PF00445	PTHR11240,PTHR11240:SF19	3.1.27.1	K01166	GO:0033897,GO:0003723
Vung69754|c0_g1_i1	Vigun03g138100	Vigun03g138100.1	0	186	Vu03	13549562	13549747	0	0	0	0	0
Vung158582|c1_g14_i1	Vigun10g019100	Vigun10g019100.1	0	4096	Vu10	2153304	2157399	0	0	0	0	0
Vung68387|c0_g3_i3	Vigun10g177900	Vigun10g177900.1	(1 of 3) 1.10.2.2//3.4.24.64 - Quinol--cytochrome-c reductase / Ubiquinone--cytochrome-c oxidoreductase // Mitochondrial processing peptidase / Processing enhancing peptidase	5582	Vu10	39627039	39632620	PF05193,PF00675	PTHR11851,PTHR11851:SF145	1.10.2.2,3.4.24.64	K01412	0
Vung85870|c0_g1_i1	Vigun11g092900	Vigun11g092900.1	(1 of 2) PTHR32285:SF71 - PROTEIN TRICHOME BIREFRINGENCE-LIKE 39-RELATED	3101	Vu11	27501153	27504253	PF14416,PF13839	PTHR32285,PTHR32285:SF71	0	0	0
Vung35506|c1_g3_i1	VigunL020600	VigunL020600.1	0	562	contig_289	33675	34236	0	0	0	0	0
Vung131209|c3_g2_i1	Vigun09g109900	Vigun09g109900.1	0	2087	Vu09	23538770	23540856	0	0	0	0	0
Vung142572|c1_g2_i10	Vigun06g016500	Vigun06g016500.1	(1 of 15) PF14576//PF14577 - Sieve element occlusion N-terminus (SEO_N) // Sieve element occlusion C-terminus (SEO_C)	4731	Vu06	7746941	7751671	PF14577,PF14576	PTHR33232,PTHR33232:SF5	0	0	0
Vung141226|c2_g2_i1	VigunL067800	VigunL067800.1	0	931	contig_5	471531	472461	0	0	0	0	0
Vung93821|c2_g3_i1	Vigun01g135300	Vigun01g135300.1	0	2158	Vu01	31506669	31508826	0	0	0	0	0
Vung88620|c2_g1_i4	Vigun03g059100	Vigun03g059100.1	0	324	Vu03	4837362	4837685	0	0	0	0	0
Vung120973|c0_g4_i1	Vigun03g126400	Vigun03g126400.1	0	409	Vu03	12008616	12009024	0	0	0	0	0
Vung137715|c8_g1_i1	Vigun01g055900	Vigun01g055900.1	0	195	Vu01	10931961	10932155	0	0	0	0	0
Vung126656|c1_g4_i1	Vigun02g132000	Vigun02g132000.1	(1 of 2) K09587 - steroid 22-alpha-hydroxylase (CYP90B1, DWF4)	4185	Vu02	28285245	28289429	PF00067	PTHR24286,PTHR24286:SF37	0	K09587	GO:0055114,GO:0020037,GO:0016705,GO:0005506
Vung91822|c2_g3_i3	Vigun10g011600	Vigun10g011600.1	(1 of 35) KOG0513 - Ca2+-independent phospholipase A2	2407	Vu10	1214995	1217401	PF01734	PTHR32176	0	0	GO:0006629
Vung71975|c0_g1_i4	Vigun11g163500	Vigun11g163500.2	(1 of 3) PTHR11771//PTHR11771:SF42 - LIPOXYGENASE // PROTEIN C13C4.7	4762	Vu11	37111322	37116083	PF00305	PTHR11771,PTHR11771:SF42	1.13.11.12	0	GO:0055114,GO:0046872,GO:0016702
Vung124829|c0_g1_i1	VigunL020600	VigunL020600.1	0	562	contig_289	33675	34236	0	0	0	0	0
Vung93438|c4_g5_i2	Vigun10g094100	Vigun10g094100.1	0	726	Vu10	27231939	27232664	0	0	0	0	0
Vung99001|c4_g2_i2	VigunL018800	VigunL018800.1	(1 of 8) K02946 - small subunit ribosomal protein S10 (RP-S10, MRPS10, rpsJ)	1577	contig_208	85443	87019	0	PTHR34890,PTHR34890:SF1	0	K02946	0
Vung137715|c4_g1_i1	Vigun01g060400	Vigun01g060400.1	0	2380	Vu01	12654637	12657016	0	0	0	0	0
Vung147616|c0_g1_i4	VigunL018800	VigunL018800.1	(1 of 8) K02946 - small subunit ribosomal protein S10 (RP-S10, MRPS10, rpsJ)	1577	contig_208	85443	87019	0	PTHR34890,PTHR34890:SF1	0	K02946	0
Vung147616|c0_g1_i5	VigunL018800	VigunL018800.1	(1 of 8) K02946 - small subunit ribosomal protein S10 (RP-S10, MRPS10, rpsJ)	1577	contig_208	85443	87019	0	PTHR34890,PTHR34890:SF1	0	K02946	0
Vung93438|c4_g2_i2	Vigun10g094100	Vigun10g094100.1	0	726	Vu10	27231939	27232664	0	0	0	0	0
Vung140435|c6_g2_i3	Vigun09g269500	Vigun09g269500.2	(1 of 2) PTHR10209:SF107 - 2-OXOGLUTARATE (2OG) AND FE(II)-DEPENDENT OXYGENASE-LIKE PROTEIN-RELATED	2869	Vu09	43216035	43218903	PF03171,PF14226	PTHR10209,PTHR10209:SF107	1.14.11.32	0	GO:0055114,GO:0016491
Vung99001|c4_g6_i2	VigunL018800	VigunL018800.1	(1 of 8) K02946 - small subunit ribosomal protein S10 (RP-S10, MRPS10, rpsJ)	1577	contig_208	85443	87019	0	PTHR34890,PTHR34890:SF1	0	K02946	0
Vung2190|c2_g7_i1	Vigun03g181000	Vigun03g181000.1	0	710	Vu03	22959128	22959837	0	0	0	0	0
Vung139820|c1_g1_i1	Vigun04g087700	Vigun04g087700.2	0	9147	Vu04	15185948	15195094	0	0	0	0	0
Vung15318|c0_g1_i1	Vigun08g030500	Vigun08g030500.4	(1 of 2) PTHR23083//PTHR23083:SF431 - TETRATRICOPEPTIDE REPEAT PROTEIN, TPR // SUBFAMILY NOT NAMED	4764	Vu08	2805420	2810183	PF07719	PTHR23083,PTHR23083:SF431	0	0	0
Vung77343|c6_g5_i1	Vigun01g139100	Vigun01g139100.1	(1 of 3) 3.1.1.26//3.1.1.3//3.1.1.32 - Galactolipase // Triacylglycerol lipase / Triglyceride lipase // Phospholipase A(1) / Phospholipase A1	3910	Vu01	31944144	31948053	PF01764	PTHR31403,PTHR31403:SF7	3.1.1.32,3.1.1.26,3.1.1.3	0	GO:0006629

## Sheet: Annotation_CTS-1DR
ID_CTS-1DR	IDGenePhytozome	IDTranscriptPhytozome	GeneDefline	GeneLength	GeneChromosome	GENEstart	GENEend	Pfam	Panther	EC	KO	GO
Vung146446|c2_g3_i1	Vigun10g173700	Vigun10g173700.1	(1 of 5) PTHR23421//PTHR23421:SF74 - BETA-GALACTOSIDASE RELATED // BETA-GALACTOSIDASE 1	6755	Vu10	39228881	39235635	PF02140,PF01301	PTHR23421,PTHR23421:SF74	3.2.1.23	0	GO:0030246,GO:0005975,GO:0004553
Vung56592|c0_g1_i5	Vigun09g170600	Vigun09g170600.1	(1 of 2) 1.7.1.1 - Nitrate reductase (NADH) / Nitrate reductase (NADH(2))	4077	Vu09	33997575	34001651	PF00173,PF00970,PF00175,PF00174,PF03404	PTHR19370,PTHR19370:SF100	1.7.1.1	K10534	GO:0055114,GO:0016491,GO:0042128,GO:0030151
Vung67799|c0_g2_i3	Vigun03g293900	Vigun03g293900.1	(1 of 2) PTHR11654:SF121 - PROTEIN NRT1/ PTR FAMILY 7.3	9805	Vu03	47956492	47966296	PF07690	PTHR11654,PTHR11654:SF121	0	K14638	GO:0055085,GO:0016021,GO:0016020,GO:0006810,GO:0005215
Vung60862|c0_g3_i7	Vigun10g062100	Vigun10g062100.2	(1 of 1) PTHR10367//PTHR10367:SF11 - MRNA-CAPPING ENZYME // SUBFAMILY NOT NAMED	21309	Vu10	13037805	13059113	PF00782,PF03919,PF01331	PTHR10367,PTHR10367:SF11	2.1.1.56	K13917	GO:0008138,GO:0006470,GO:0004484,GO:0006397,GO:0006370
Vung39747|c1_g2_i4	Vigun01g091500	Vigun01g091500.4	(1 of 14) PF07714//PF08263//PF13855 - Protein tyrosine kinase (Pkinase_Tyr) // Leucine rich repeat N-terminal domain (LRRNT_2) // Leucine rich repeat (LRR_8)	5897	Vu01	25262866	25268762	PF08263,PF13855,PF07714	PTHR27003,PTHR27003:SF88	2.7.11.1	0	GO:0005515,GO:0006468,GO:0004672
Vung162810|c2_g1_i14	Vigun09g096000	Vigun09g096000.1	(1 of 7) 2.4.1.82 - Galactinol--sucrose galactosyltransferase / Raffinose synthase	4229	Vu09	14538762	14542990	PF05691	PTHR31268,PTHR31268:SF10	2.4.1.82	0	0
Vung150978|c1_g2_i4	Vigun05g077600	Vigun05g077600.1	(1 of 2) PTHR32116//PTHR32116:SF4 - FAMILY NOT NAMED // POLYGALACTURONATE 4-ALPHA-GALACTURONOSYLTRANSFERASE-RELATED	6442	Vu05	7196314	7202755	PF01501	PTHR32116,PTHR32116:SF4	2.4.1.43	K13648	GO:0016757,GO:0047262
Vung99050|c0_g2_i1	Vigun09g277700	Vigun09g277700.3	(1 of 1) PTHR10615//PTHR10615:SF117 - HISTONE ACETYLTRANSFERASE // SUBFAMILY NOT NAMED	13068	Vu09	43749801	43762868	PF00628	PTHR10615,PTHR10615:SF117	0	0	GO:0005515
Vung19573|c2_g2_i7	Vigun01g222300	Vigun01g222300.1	(1 of 13) PTHR10795//PTHR10795:SF348 - PROPROTEIN CONVERTASE SUBTILISIN/KEXIN // SUBFAMILY NOT NAMED	4747	Vu01	39565687	39570433	PF05922,PF00082	PTHR10795,PTHR10795:SF348	3.4.21.25	0	GO:0006508,GO:0004252
Vung75349|c1_g2_i8	Vigun09g120400	Vigun09g120400.1	(1 of 2) PTHR31580:SF5 - FILAMENT-LIKE PLANT PROTEIN 3	3899	Vu09	26513305	26517203	PF05911	PTHR31580,PTHR31580:SF5	0	0	0
Vung7408|c0_g1_i6	Vigun09g032900	Vigun09g032900.1	(1 of 5) PTHR23421//PTHR23421:SF74 - BETA-GALACTOSIDASE RELATED // BETA-GALACTOSIDASE 1	5629	Vu09	2832456	2838084	PF01301	PTHR23421,PTHR23421:SF74	3.2.1.23	0	GO:0005975,GO:0004553
Vung116562|c0_g1_i4	Vigun09g224400	Vigun09g224400.1	(1 of 2) 5.3.99.5 - Thromboxane-A synthase / Thromboxane synthetase	6741	Vu09	39721329	39728069	PF00067	PTHR24301,PTHR24301:SF2	5.3.99.5	0	GO:0055114,GO:0020037,GO:0016705,GO:0005506
Vung5064|c3_g1_i7	Vigun06g089300	Vigun06g089300.2	(1 of 2) PTHR32370//PTHR32370:SF17 - FAMILY NOT NAMED // ROOT PHOTOTROPISM PROTEIN 2	2763	Vu06	22141184	22143946	PF00651,PF03000	PTHR32370,PTHR32370:SF17	0	0	GO:0005515,GO:0009638,GO:0004871
Vung3005|c0_g1_i1	Vigun09g188700	Vigun09g188700.1	(1 of 2) PTHR31317//PTHR31317:SF3 - FAMILY NOT NAMED // F2J10.8 PROTEIN-RELATED	2444	Vu09	36313626	36316069	PF06219	PTHR31317,PTHR31317:SF3	0	0	0
Vung111895|c4_g5_i8	Vigun09g130900	Vigun09g130900.2	(1 of 4) PTHR23092//PTHR23092:SF30 - TOPOISOMERASE-RELATED PROTEIN // NUCLEOTIDYLTRANSFERASE FAMILY PROTEIN-RELATED	6052	Vu09	28910580	28916631	0	PTHR23092,PTHR23092:SF30	2.7.7.19	0	0
Vung108319|c0_g1_i3	Vigun04g177800	Vigun04g177800.2	(1 of 1) PTHR11200//PTHR11200:SF168 - INOSITOL 5-PHOSPHATASE // SUBFAMILY NOT NAMED	3914	Vu04	40100226	40104139	PF03372	PTHR11200,PTHR11200:SF168	0	K01099	0
Vung162810|c2_g1_i3	Vigun09g096000	Vigun09g096000.1	(1 of 7) 2.4.1.82 - Galactinol--sucrose galactosyltransferase / Raffinose synthase	4229	Vu09	14538762	14542990	PF05691	PTHR31268,PTHR31268:SF10	2.4.1.82	0	0
Vung52406|c2_g1_i3	Vigun09g240500	Vigun09g240500.3	(1 of 2) PTHR23054:SF29 - EXPRESSED PROTEIN	4136	Vu09	41048658	41052793	PF14389,PF04784	PTHR23054,PTHR23054:SF29	0	0	0
Vung163901|c0_g1_i5	Vigun06g163500	Vigun06g163500.1	(1 of 1) 3.5.4.26//5.4.99.28 - Diaminohydroxyphosphoribosylaminopyrimidine deaminase // tRNA pseudouridine(32) synthase / Pseudouridine synthase RluA	5246	Vu06	28580483	28585728	PF00849	PTHR11079,PTHR11079:SF79	5.4.99.28,3.5.4.26	0	GO:0009982,GO:0009451,GO:0003723,GO:0001522
Vung65205|c0_g3_i1	Vigun06g040200	Vigun06g040200.1	(1 of 2) PTHR15486:SF0 - ANCIENT UBIQUITOUS PROTEIN 1	3111	Vu06	16026668	16029778	PF01553	PTHR15486,PTHR15486:SF0	2.3.1.15	K13508	GO:0016746,GO:0008152
Vung59899|c0_g10_i1	Vigun08g095000	Vigun08g095000.1	(1 of 4) PTHR15486:SF18 - GLYCEROL-3-PHOSPHATE ACYLTRANSFERASE 2-RELATED	2444	Vu08	22577165	22579608	PF01553	PTHR15486,PTHR15486:SF18	2.3.1.15	K13508	GO:0016746,GO:0008152
Vung96323|c0_g3_i3	Vigun05g145200	Vigun05g145200.1	(1 of 2) PTHR27007:SF61 - RECEPTOR LIKE PROTEIN KINASE S.2	2636	Vu05	19695279	19697914	PF00069	PTHR27007,PTHR27007:SF61	2.7.11.1	0	GO:0006468,GO:0005524,GO:0004672
Vung89545|c1_g1_i15	Vigun03g313500	Vigun03g313500.1	(1 of 2) PTHR13780//PTHR13780:SF36 - AMP-ACTIVATED PROTEIN KINASE, GAMMA REGULATORY SUBUNIT // SNF1-RELATED PROTEIN KINASE REGULATORY SUBUNIT GAMMA-1	3177	Vu03	50633012	50636188	PF00571	PTHR13780,PTHR13780:SF36	0	0	0
Vung77000|c0_g2_i1	Vigun06g060800	Vigun06g060800.1	(1 of 138) KOG0156 - Cytochrome P450 CYP2 subfamily	1942	Vu06	18857644	18859585	PF00067	PTHR24298,PTHR24298:SF159	0	0	GO:0055114,GO:0020037,GO:0016705,GO:0005506
Vung125259|c0_g1_i1	Vigun03g026200	Vigun03g026200.1	(1 of 2) PTHR33172:SF2 - EMB|CAB83157.1	2362	Vu03	1962436	1964797	0	PTHR33172,PTHR33172:SF2	0	0	0
Vung166419|c0_g1_i2	Vigun07g231700	Vigun07g231700.1	(1 of 1) 5.4.2.5 - Phosphoglucomutase (glucose-cofactor) / Glucose-1-phosphate phosphotransferase	8713	Vu07	35346398	35355110	PF00408,PF02879,PF02880,PF02878	PTHR22573,PTHR22573:SF2	5.4.2.2,5.4.2.5	K01835	GO:0071704,GO:0016868,GO:0005975
Vung95564|c0_g1_i1	Vigun09g075100	Vigun09g075100.1	(1 of 7) PTHR31089:SF4 - CYCLIC DOF FACTOR 2-RELATED	3739	Vu09	8479998	8483736	PF02701	PTHR31089,PTHR31089:SF4	0	0	GO:0006355,GO:0003677
Vung40222|c2_g3_i3	Vigun03g345400	Vigun03g345400.1	(1 of 1) KOG3308 - Uncharacterized protein of the uridine kinase family	13366	Vu03	54459234	54472599	PF01928,PF00485	PTHR10285,PTHR10285:SF76	2.7.1.48	0	GO:0016301,GO:0008152,GO:0005524
Vung15355|c3_g2_i1	Vigun03g195700	Vigun03g195700.1	(1 of 4) PTHR24298:SF45 - CYTOCHROME P450 89A2-RELATED	1748	Vu03	27574145	27575892	PF00067	PTHR24298,PTHR24298:SF45	0	0	GO:0055114,GO:0020037,GO:0016705,GO:0005506
Vung91560|c0_g1_i2	Vigun02g148900	Vigun02g148900.1	(1 of 2) PTHR13832//PTHR13832:SF362 - PROTEIN PHOSPHATASE 2C // PROTEIN PHOSPHATASE 2C 63-RELATED	2358	Vu02	29639901	29642258	PF13672	PTHR13832,PTHR13832:SF362	3.1.3.16	0	GO:0006470,GO:0004722
Vung12894|c1_g3_i6	Vigun09g196400	Vigun09g196400.2	(1 of 1) PTHR11134//PTHR11134:SF4 - ADAPTER-RELATED PROTEIN COMPLEX, BETA SUBUNIT // AP-4 COMPLEX SUBUNIT BETA-1	8195	Vu09	37097918	37106112	PF09066,PF01602	PTHR11134,PTHR11134:SF4	0	0	GO:0030131,GO:0016192,GO:0006886,GO:0030117
Vung5031|c0_g3_i21	Vigun08g036100	Vigun08g036100.1	(1 of 2) PTHR12000//PTHR12000:SF13 - HEMOGLOBINASE FAMILY MEMBER // SUBFAMILY NOT NAMED	6870	Vu08	3471918	3478787	PF01650	PTHR12000,PTHR12000:SF13	3.4.22.34	K01369	GO:0008233,GO:0006508
Vung5031|c0_g3_i32	Vigun08g036100	Vigun08g036100.1	(1 of 2) PTHR12000//PTHR12000:SF13 - HEMOGLOBINASE FAMILY MEMBER // SUBFAMILY NOT NAMED	6870	Vu08	3471918	3478787	PF01650	PTHR12000,PTHR12000:SF13	3.4.22.34	K01369	GO:0008233,GO:0006508
Vung6443|c1_g2_i1	Vigun10g044900	Vigun10g044900.1	(1 of 138) KOG0156 - Cytochrome P450 CYP2 subfamily	5207	Vu10	6562280	6567486	PF00067	PTHR24298,PTHR24298:SF162	0	0	GO:0055114,GO:0020037,GO:0016705,GO:0005506
Vung138358|c0_g2_i3	Vigun02g170900	Vigun02g170900.7	(1 of 2) K14270 - aminotransferase (ACS10_12)	4168	Vu02	31394157	31398324	PF00155	PTHR11751,PTHR11751:SF411	4.4.1.14	0	GO:0030170,GO:0009058
Vung151466|c0_g2_i10	Vigun09g126300	Vigun09g126300.4	(1 of 84) PF00892 - EamA-like transporter family (EamA)	12248	Vu09	27991424	28003671	PF00892	PTHR31218,PTHR31218:SF15	0	0	GO:0016021,GO:0016020,GO:0022857
Vung50890|c4_g2_i8	Vigun03g020000	Vigun03g020000.1	(1 of 4) K12355 - coniferyl-aldehyde dehydrogenase (REF1)	2939	Vu03	1460529	1463467	PF00171	PTHR11699,PTHR11699:SF182	1.2.1.5	K12355	GO:0055114,GO:0016491,GO:0008152
Vung139773|c0_g1_i10	Vigun11g225500	Vigun11g225500.3	(1 of 1) PTHR11200//PTHR11200:SF136 - INOSITOL 5-PHOSPHATASE // PHOSPHOINOSITIDE PHOSPHATASE SAC1	12750	Vu11	41574895	41587644	PF02383	PTHR11200,PTHR11200:SF136	0	0	GO:0042578
Vung92002|c0_g1_i4	Vigun02g089900	Vigun02g089900.1	(1 of 1) PTHR12526//PTHR12526:SF382 - GLYCOSYLTRANSFERASE // SUBFAMILY NOT NAMED	8321	Vu02	24483423	24491743	PF08323	PTHR12526,PTHR12526:SF382	0	0	0
Vung114690|c0_g2_i5	Vigun09g167300	Vigun09g167300.1	(1 of 84) PF00892 - EamA-like transporter family (EamA)	3856	Vu09	33571301	33575156	PF00892	PTHR31218,PTHR31218:SF38	0	0	GO:0016021,GO:0016020,GO:0022857
Vung18665|c0_g2_i5	Vigun03g160600	Vigun03g160600.1	(1 of 2) PTHR31062:SF44 - XYLOGLUCAN ENDOTRANSGLUCOSYLASE/HYDROLASE PROTEIN 27-RELATED	2632	Vu03	17742883	17745514	PF06955,PF00722	PTHR31062,PTHR31062:SF44	2.4.1.207	K08235	GO:0048046,GO:0016762,GO:0006073,GO:0005618,GO:0005975,GO:0004553
Vung138907|c0_g1_i1	Vigun08g166600	Vigun08g166600.1	(1 of 1) PTHR22950//PTHR22950:SF289 - AMINO ACID TRANSPORTER // SUBFAMILY NOT NAMED	3401	Vu08	33835009	33838409	PF03222	PTHR22950,PTHR22950:SF289	0	0	GO:0003333
Vung63570|c0_g2_i5	Vigun07g294400	Vigun07g294400.1	(1 of 8) PF00069//PF01453 - Protein kinase domain (Pkinase) // D-mannose binding lectin (B_lectin)	2726	Vu07	40532765	40535490	PF01453,PF00069	PTHR27002,PTHR27002:SF64	2.7.11.1	0	GO:0006468,GO:0005524,GO:0004672
Vung158108|c0_g1_i17	Vigun08g036300	Vigun08g036300.2	(1 of 2) PTHR13832//PTHR13832:SF315 - PROTEIN PHOSPHATASE 2C // PROTEIN PHOSPHATASE 2C 61-RELATED	3252	Vu08	3486287	3489538	PF00481	PTHR13832,PTHR13832:SF315	3.1.3.16	0	GO:0003824,GO:0006470,GO:0004722
Vung156499|c0_g1_i1	Vigun07g084600	Vigun07g084600.2	(1 of 84) PF00892 - EamA-like transporter family (EamA)	3509	Vu07	12564162	12567670	PF00892	PTHR31218,PTHR31218:SF29	0	0	GO:0016021,GO:0016020,GO:0022857
Vung163910|c3_g1_i2	Vigun03g250800	Vigun03g250800.5	(1 of 2) 2.5.1.20 - Rubber cis-polyprenylcistransferase / Rubber transferase	5736	Vu03	41671480	41677215	PF01255	PTHR10291	2.5.1.20	K11778	GO:0016765
Vung31058|c0_g1_i6	Vigun01g193900	Vigun01g193900.1	(1 of 2) PTHR12526:SF348 - SUCROSE SYNTHASE 2	4265	Vu01	37142572	37146836	PF00534,PF00862	PTHR12526,PTHR12526:SF348	2.4.1.13	K00695	GO:0016157,GO:0005985
Vung31058|c0_g1_i7	Vigun01g193900	Vigun01g193900.1	(1 of 2) PTHR12526:SF348 - SUCROSE SYNTHASE 2	4265	Vu01	37142572	37146836	PF00534,PF00862	PTHR12526,PTHR12526:SF348	2.4.1.13	K00695	GO:0016157,GO:0005985
Vung148579|c1_g1_i10	Vigun03g398900	Vigun03g398900.1	(1 of 3) PTHR10338//PTHR10338:SF114 - VON WILLEBRAND FACTOR, TYPE A DOMAIN CONTAINING // SUBFAMILY NOT NAMED	6999	Vu03	60544464	60551462	PF13768	PTHR10338,PTHR10338:SF114	0	0	0
Vung80997|c1_g2_i4	Vigun01g069900	Vigun01g069900.1	(1 of 3) K10808 - ribonucleoside-diphosphate reductase subunit M2 (RRM2)	1536	Vu01	18718334	18719869	PF00268	PTHR23409	1.17.4.1	K10808	GO:0055114,GO:0009186
Vung150903|c0_g1_i1	Vigun08g109100	Vigun08g109100.1	(1 of 1) PTHR31642//PTHR31642:SF12 - FAMILY NOT NAMED // PROTEIN ECERIFERUM 1	4032	Vu08	27089648	27093679	PF02458	PTHR31642,PTHR31642:SF12	0	0	GO:0016747
Vung137335|c3_g2_i8	Vigun05g180600	Vigun05g180600.2	(1 of 2) PF00069//PF11721 - Protein kinase domain (Pkinase) // Di-glucose binding within endoplasmic reticulum (Malectin)	37992	Vu05	34379081	34417072	PF00069,PF11721	PTHR27006,PTHR27006:SF11	2.7.11.1	0	GO:0006468,GO:0005524,GO:0004672
Vung24025|c0_g1_i5	Vigun07g152800	Vigun07g152800.1	(1 of 2) PTHR10314:SF97 - BIFUNCTIONAL L-3-CYANOALANINE SYNTHASE/CYSTEINE SYNTHASE D1-RELATED	6842	Vu07	26389468	26396309	PF00291	PTHR10314,PTHR10314:SF97	2.5.1.47	K01738	0
Vung66857|c2_g1_i1	Vigun09g075100	Vigun09g075100.1	(1 of 7) PTHR31089:SF4 - CYCLIC DOF FACTOR 2-RELATED	3739	Vu09	8479998	8483736	PF02701	PTHR31089,PTHR31089:SF4	0	0	GO:0006355,GO:0003677
Vung108319|c0_g1_i2	Vigun04g177800	Vigun04g177800.2	(1 of 1) PTHR11200//PTHR11200:SF168 - INOSITOL 5-PHOSPHATASE // SUBFAMILY NOT NAMED	3914	Vu04	40100226	40104139	PF03372	PTHR11200,PTHR11200:SF168	0	K01099	0
Vung125259|c0_g1_i2	Vigun03g026200	Vigun03g026200.7	(1 of 2) PTHR33172:SF2 - EMB|CAB83157.1	2362	Vu03	1962436	1964797	0	PTHR33172,PTHR33172:SF2	0	0	0
Vung144927|c2_g1_i4	Vigun03g035900	Vigun03g035900.1	0	6019	Vu03	2762585	2768603	0	PTHR37381,PTHR37381:SF1	0	0	0
Vung148924|c0_g1_i1	Vigun09g221500	Vigun09g221500.1	(1 of 1) PTHR31618:SF3 - MECHANOSENSITIVE ION CHANNEL PROTEIN 10-RELATED	4081	Vu09	39492284	39496364	PF00924	PTHR31618,PTHR31618:SF3	0	0	GO:0055085,GO:0016020
Vung71677|c0_g1_i1	Vigun08g090400	Vigun08g090400.1	(1 of 84) PF00892 - EamA-like transporter family (EamA)	3002	Vu08	20957093	20960094	PF00892	PTHR31218,PTHR31218:SF38	0	0	GO:0016021,GO:0016020,GO:0022857
Vung5031|c0_g3_i4	Vigun08g036100	Vigun08g036100.1	(1 of 2) PTHR12000//PTHR12000:SF13 - HEMOGLOBINASE FAMILY MEMBER // SUBFAMILY NOT NAMED	6870	Vu08	3471918	3478787	PF01650	PTHR12000,PTHR12000:SF13	3.4.22.34	K01369	GO:0008233,GO:0006508
Vung159984|c0_g3_i15	Vigun11g176000	Vigun11g176000.2	(1 of 1) PTHR12565//PTHR12565:SF126 - STEROL REGULATORY ELEMENT-BINDING PROTEIN // SUBFAMILY NOT NAMED	2681	Vu11	38079164	38081844	PF00010	PTHR12565,PTHR12565:SF126	0	0	GO:0046983
Vung34621|c1_g1_i14	Vigun02g108000	Vigun02g108000.1	(1 of 2) PTHR24286//PTHR24286:SF10 - FAMILY NOT NAMED // ABSCISIC ACID 8'-HYDROXYLASE 1-RELATED	2893	Vu02	26205327	26208219	PF00067	PTHR24286,PTHR24286:SF10	1.14.13.93	0	GO:0055114,GO:0020037,GO:0016705,GO:0005506
Vung125259|c0_g1_i4	Vigun03g026200	Vigun03g026200.8	(1 of 2) PTHR33172:SF2 - EMB|CAB83157.1	2362	Vu03	1962436	1964797	0	PTHR33172,PTHR33172:SF2	0	0	0
Vung57799|c4_g1_i4	Vigun10g175300	Vigun10g175300.1	(1 of 6) K13248 - pyridoxal phosphate phosphatase PHOSPHO2 (PHOSPHO2)	2369	Vu10	39380140	39382508	PF06888	PTHR20889,PTHR20889:SF4	3.6.1.1	K13248	GO:0016791,GO:0008152
Vung44613|c0_g1_i4	Vigun09g032800	Vigun09g032800.1	(1 of 4) PTHR10071//PTHR10071:SF191 - TRANSCRIPTION FACTOR GATA GATA BINDING FACTOR // SUBFAMILY NOT NAMED	1936	Vu09	2800455	2802390	PF00320	PTHR10071,PTHR10071:SF191	0	0	GO:0043565,GO:0008270,GO:0006355,GO:0003700
Vung51571|c1_g1_i6	Vigun08g156500	Vigun08g156500.2	(1 of 6) PTHR24078//PTHR24078:SF261 - DNAJ HOMOLOG SUBFAMILY C MEMBER // DNAJ (HSP40) HOMOLOG, SUBFAMILY A, MEMBER 3A	2231	Vu08	32876242	32878472	PF00249	PTHR24078,PTHR24078:SF261	0	0	0
Vung136422|c1_g1_i2	Vigun03g099600	Vigun03g099600.1	(1 of 7) 6.2.1.1 - Acetate--CoA ligase / Acyl-activating enzyme	10718	Vu03	8518854	8529571	PF13193,PF00501	PTHR24095,PTHR24095:SF153	6.2.1.1	0	GO:0008152,GO:0003824
Vung107777|c1_g1_i5	Vigun01g109600	Vigun01g109600.1	(1 of 2) K14674 - TAG lipase / steryl ester hydrolase / phospholipase A2 / LPA acyltransferase (TGL4)	5212	Vu01	28297541	28302752	PF01734,PF11815	PTHR14226,PTHR14226:SF30	3.1.1.3	K14674	GO:0006629,GO:0004806
Vung36217|c0_g1_i5	Vigun11g191900	Vigun11g191900.3	(1 of 1) PTHR18929//PTHR18929:SF92 - PROTEIN DISULFIDE ISOMERASE // ENDOPLASMIC RETICULUM RESIDENT PROTEIN 27	7003	Vu11	39109362	39116364	PF02622	PTHR18929,PTHR18929:SF92	5.3.4.1	0	0
Vung138358|c0_g2_i2	Vigun02g170900	Vigun02g170900.5	(1 of 2) K14270 - aminotransferase (ACS10_12)	4168	Vu02	31394157	31398324	PF00155	PTHR11751,PTHR11751:SF411	0	0	GO:0030170,GO:0009058
Vung159421|c1_g1_i10	Vigun03g370200	Vigun03g370200.1	(1 of 1) PTHR11699//PTHR11699:SF29 - ALDEHYDE DEHYDROGENASE-RELATED // NADP-DEPENDENT GLYCERALDEHYDE-3-PHOSPHATE DEHYDROGENASE	4047	Vu03	57279421	57283467	PF00171	PTHR11699,PTHR11699:SF29	1.2.1.9	K00131	GO:0055114,GO:0016491,GO:0008152
Vung3123|c0_g1_i1	Vigun09g177600	Vigun09g177600.1	(1 of 5) PTHR31279//PTHR31279:SF3 - FAMILY NOT NAMED // (PHI-1) PROTEIN, PUTATIVE-RELATED	1315	Vu09	34994102	34995416	PF04674	PTHR31279,PTHR31279:SF3	0	0	0
Vung77947|c0_g1_i8	Vigun02g048400	Vigun02g048400.1	(1 of 1) K02350 - DNA polymerase zeta (POLZ1, rev3)	18443	Vu02	18832321	18850763	PF14260,PF03104,PF00136	PTHR10322,PTHR10322:SF5	2.7.7.7	K02350	GO:0008408,GO:0003677,GO:0000166,GO:0019985,GO:0016035,GO:0006281
Vung48781|c0_g2_i2	Vigun05g260400	Vigun05g260400.1	(1 of 3) PTHR11040//PTHR11040:SF23 - ZINC/IRON TRANSPORTER // SUBFAMILY NOT NAMED	1444	Vu05	45365933	45367376	PF02535	PTHR11040,PTHR11040:SF23	0	K14709	GO:0055085,GO:0046873,GO:0030001,GO:0016020
Vung43553|c1_g1_i3	Vigun03g265700	Vigun03g265700.2	(1 of 3) PTHR22849//PTHR22849:SF40 - WDSAM1 PROTEIN // U-BOX DOMAIN-CONTAINING PROTEIN 5	4563	Vu03	43554843	43559405	PF04564	PTHR22849,PTHR22849:SF40	6.3.2.19	0	GO:0016567,GO:0004842
Vung119947|c0_g1_i1	Vigun09g188100	Vigun09g188100.1	(1 of 1) 2.7.1.17 - Xylulokinase / Xylulose kinase	4032	Vu09	36223428	36227459	PF00370,PF02782	PTHR10196,PTHR10196:SF57	2.7.1.17	K00854	GO:0016773,GO:0005975
Vung94679|c1_g2_i5	Vigun06g134900	Vigun06g134900.1	(1 of 1) 1.1.1.320 - Benzil reductase ((S)-benzoin forming)	3358	Vu06	26122943	26126300	PF00106	PTHR24322,PTHR24322:SF540	1.1.1.320	0	GO:0016491,GO:0008152
Vung40533|c0_g1_i5	Vigun06g200600	Vigun06g200600.1	(1 of 1) PTHR31579:SF11 - EXPRESSED PROTEIN	1778	Vu06	31576780	31578557	PF04720	PTHR31579,PTHR31579:SF11	0	0	0
Vung111255|c1_g2_i14	Vigun02g109200	Vigun02g109200.1	(1 of 84) PF00892 - EamA-like transporter family (EamA)	3891	Vu02	26336415	26340305	PF00892	PTHR31218,PTHR31218:SF1	0	0	GO:0016021,GO:0016020,GO:0022857
Vung89545|c1_g1_i13	Vigun03g313500	Vigun03g313500.2	(1 of 2) PTHR13780//PTHR13780:SF36 - AMP-ACTIVATED PROTEIN KINASE, GAMMA REGULATORY SUBUNIT // SNF1-RELATED PROTEIN KINASE REGULATORY SUBUNIT GAMMA-1	3177	Vu03	50633012	50636188	PF00571	PTHR13780,PTHR13780:SF36	0	0	0
Vung147521|c0_g1_i13	Vigun01g074400	Vigun01g074400.1	(1 of 1) PTHR22958 - RELATED TO MULTIFUNCTIONAL CYCLIN-DEPENDENT KINASE-RELATED	2656	Vu01	20673909	20676564	PF03009	PTHR22958,PTHR22958:SF10	3.1.4.46	0	GO:0008081,GO:0006629
Vung131826|c2_g1_i6	Vigun03g354700	Vigun03g354700.1	(1 of 3) PTHR24089:SF348 - ADENINE NUCLEOTIDE TRANSPORTER BT1, CHLOROPLASTIC/MITOCHONDRIAL	2157	Vu03	55622424	55624580	PF00153	PTHR24089,PTHR24089:SF348	0	K14684	0
Vung13389|c0_g1_i9	Vigun05g303500	Vigun05g303500.1	(1 of 3) PF12576 - Protein of unknown function (DUF3754) (DUF3754)	10730	Vu05	48601338	48612067	PF12576	PTHR33645,PTHR33645:SF1	0	0	0
Vung39674|c0_g1_i1	Vigun01g114600	Vigun01g114600.1	(1 of 18) K09285 - AP2-like factor, ANT lineage (OVM, ANT)	3925	Vu01	29055040	29058964	PF00847	PTHR32467,PTHR32467:SF32	0	K09285	GO:0006355,GO:0003700,GO:0007275
Vung4418|c0_g1_i2	Vigun05g067100	Vigun05g067100.1	(1 of 1) PTHR31352//PTHR31352:SF2 - FAMILY NOT NAMED // BETA-AMYLASE 7	5494	Vu05	5790073	5795566	PF05687,PF01373	PTHR31352,PTHR31352:SF2	3.2.1.2	K01177	GO:0016161,GO:0000272
Vung50189|c2_g1_i1	Vigun05g102200	Vigun05g102200.2	(1 of 2) PTHR31503:SF1 - VACUOLAR CATION/PROTON EXCHANGER 1-RELATED	3709	Vu05	10183636	10187344	PF01699	PTHR31503,PTHR31503:SF1	0	K07300	GO:0055085,GO:0016021
Vung55551|c2_g1_i1	Vigun11g156900	Vigun11g156900.1	(1 of 2) K08956 - AFG3 family protein [EC:3.4.24.-] (AFG3)	5432	Vu11	36572604	36578035	PF06480,PF00004,PF01434	PTHR23076,PTHR23076:SF69	0	K08956	GO:0016021,GO:0008270,GO:0005524,GO:0004222,GO:0006508
Vung85478|c2_g1_i6	Vigun11g002800	Vigun11g002800.1	(1 of 2) PTHR31741//PTHR31741:SF11 - FAMILY NOT NAMED // AXI 1 PROTEIN-LIKE PROTEIN	3999	Vu11	273817	277815	PF10250	PTHR31741,PTHR31741:SF11	0	0	0
Vung7408|c0_g1_i8	Vigun09g032900	Vigun09g032900.1	(1 of 5) PTHR23421//PTHR23421:SF74 - BETA-GALACTOSIDASE RELATED // BETA-GALACTOSIDASE 1	5629	Vu09	2832456	2838084	PF01301	PTHR23421,PTHR23421:SF74	3.2.1.23	0	GO:0005975,GO:0004553
Vung45001|c0_g1_i1	Vigun03g425700	Vigun03g425700.1	0	1438	Vu03	63129141	63130578	0	0	0	0	0
Vung130901|c1_g1_i3	Vigun02g175000	Vigun02g175000.1	(1 of 3) PTHR22950//PTHR22950:SF269 - AMINO ACID TRANSPORTER // EXPRESSED PROTEIN	4458	Vu02	31730137	31734594	PF01490	PTHR22950,PTHR22950:SF269	0	K15015	0
Vung162810|c2_g1_i1	Vigun09g096000	Vigun09g096000.2	(1 of 7) 2.4.1.82 - Galactinol--sucrose galactosyltransferase / Raffinose synthase	4229	Vu09	14538762	14542990	PF05691	PTHR31268,PTHR31268:SF10	2.4.1.82	0	0
Vung44900|c4_g1_i29	Vigun11g217100	Vigun11g217100.2	(1 of 2) K16615 - actin-related protein 7, plant (PARP7)	5641	Vu11	41074637	41080277	PF00022	PTHR11937,PTHR11937:SF257	0	0	0
Vung96428|c1_g3_i2	Vigun02g021900	Vigun02g021900.2	(1 of 2) PTHR12691:SF10 - MEDIATOR OF RNA POLYMERASE II TRANSCRIPTION SUBUNIT 23	7188	Vu02	7497687	7504874	0	PTHR12691,PTHR12691:SF10	0	0	0
Vung9332|c1_g1_i1	Vigun11g152600	Vigun11g152600.2	(1 of 2) PTHR10641//PTHR10641:SF484 - MYB-LIKE DNA-BINDING PROTEIN MYB // TRANSCRIPTION FACTOR MYB48-RELATED	1495	Vu11	36234007	36235501	0	0	0	0	0
Vung31882|c0_g1_i3	Vigun06g165100	Vigun06g165100.1	(1 of 2) PTHR11772:SF18 - ALUMINUM INDUCED PROTEIN WITH YGL AND LRDR MOTIFS	5056	Vu06	28688567	28693622	PF13537	PTHR11772,PTHR11772:SF18	0	0	0
Vung54304|c0_g1_i1	Vigun02g014100	Vigun02g014100.1	(1 of 4) PTHR31969//PTHR31969:SF1 - FAMILY NOT NAMED // GEM-LIKE PROTEIN 4-RELATED	1857	Vu02	5225175	5227031	PF02893	PTHR31969,PTHR31969:SF1	0	0	0
Vung102919|c0_g2_i1	Vigun05g226500	Vigun05g226500.2	(1 of 2) PTHR18966//PTHR18966:SF190 - IONOTROPIC GLUTAMATE RECEPTOR // GLUTAMATE RECEPTOR 3.4-RELATED	5222	Vu05	41897864	41903085	PF00497,PF13458,PF00060	PTHR18966,PTHR18966:SF190	0	K05387	GO:0016020,GO:0004970
Vung3005|c0_g1_i2	Vigun09g188700	Vigun09g188700.1	(1 of 2) PTHR31317//PTHR31317:SF3 - FAMILY NOT NAMED // F2J10.8 PROTEIN-RELATED	2444	Vu09	36313626	36316069	PF06219	PTHR31317,PTHR31317:SF3	0	0	0
Vung57799|c4_g1_i1	Vigun10g175300	Vigun10g175300.1	(1 of 6) K13248 - pyridoxal phosphate phosphatase PHOSPHO2 (PHOSPHO2)	2369	Vu10	39380140	39382508	PF06888	PTHR20889,PTHR20889:SF4	3.6.1.1	K13248	GO:0016791,GO:0008152
Vung57799|c4_g1_i2	Vigun10g175300	Vigun10g175300.1	(1 of 6) K13248 - pyridoxal phosphate phosphatase PHOSPHO2 (PHOSPHO2)	2369	Vu10	39380140	39382508	PF06888	PTHR20889,PTHR20889:SF4	3.6.1.1	K13248	GO:0016791,GO:0008152
Vung48445|c0_g1_i1	Vigun05g197300	Vigun05g197300.1	(1 of 101) PF02365 - No apical meristem (NAM) protein (NAM)	2703	Vu05	38169870	38172572	PF02365	PTHR31719,PTHR31719:SF29	0	0	GO:0006355,GO:0003677
Vung147521|c0_g1_i11	Vigun01g074400	Vigun01g074400.1	(1 of 1) PTHR22958 - RELATED TO MULTIFUNCTIONAL CYCLIN-DEPENDENT KINASE-RELATED	2656	Vu01	20673909	20676564	PF03009	PTHR22958,PTHR22958:SF10	3.1.4.46	0	GO:0008081,GO:0006629
Vung114734|c1_g1_i4	Vigun09g153000	Vigun09g153000.1	(1 of 2) PTHR10791:SF28 - BIDIRECTIONAL SUGAR TRANSPORTER SWEET3	2185	Vu09	31786502	31788686	PF03083	PTHR10791,PTHR10791:SF28	0	K15382	0
Vung28474|c3_g2_i4	Vigun09g149200	Vigun09g149200.2	(1 of 2) PTHR10315//PTHR10315:SF34 - SEVEN IN ABSENTIA HOMOLOG // E3 UBIQUITIN-PROTEIN LIGASE SINAT3-RELATED	3885	Vu09	31263432	31267316	PF03145	PTHR10315,PTHR10315:SF34	6.3.2.19	0	GO:0007275,GO:0006511,GO:0005634
Vung130774|c1_g1_i6	Vigun03g182100	Vigun03g182100.2	(1 of 1) PTHR16223:SF41 - BHLH TRANSCRIPTION FACTOR	4351	Vu03	23388763	23393113	0	PTHR16223,PTHR16223:SF41	0	0	0
Vung24025|c0_g1_i11	Vigun07g152800	Vigun07g152800.5	(1 of 2) PTHR10314:SF97 - BIFUNCTIONAL L-3-CYANOALANINE SYNTHASE/CYSTEINE SYNTHASE D1-RELATED	6842	Vu07	26389468	26396309	PF00291	PTHR10314,PTHR10314:SF97	2.5.1.47	K01738	0
Vung148051|c2_g1_i1	Vigun06g213000	Vigun06g213000.1	(1 of 21) PF00069//PF08263 - Protein kinase domain (Pkinase) // Leucine rich repeat N-terminal domain (LRRNT_2)	2238	Vu06	32496136	32498373	PF08263,PF00069	PTHR27000,PTHR27000:SF29	2.7.11.1	0	GO:0006468,GO:0005524,GO:0004672
Vung152642|c0_g1_i1	Vigun09g157400	Vigun09g157400.2	(1 of 2) K03875 - F-box and leucine-rich repeat protein 1 (S-phase kinase-associated protein 2) (SKP2, FBXL1)	4126	Vu09	32336701	32340826	PF12937,PF13516	PTHR24006	0	0	GO:0005515
Vung65205|c0_g2_i1	Vigun06g040200	Vigun06g040200.1	(1 of 2) PTHR15486:SF0 - ANCIENT UBIQUITOUS PROTEIN 1	3111	Vu06	16026668	16029778	PF01553	PTHR15486,PTHR15486:SF0	2.3.1.15	K13508	GO:0016746,GO:0008152
Vung156042|c1_g2_i3	Vigun04g034200	Vigun04g034200.1	(1 of 5) K01915 - glutamine synthetase (glnA, GLUL)	3332	Vu04	2828923	2832254	PF03951,PF00120	PTHR20852,PTHR20852:SF59	6.3.1.2	K01915	GO:0006807,GO:0006542,GO:0004356
Vung113392|c0_g1_i6	Vigun07g026400	Vigun07g026400.1	0	2750	Vu07	2371548	2374297	0	0	0	0	0
Vung29822|c0_g1_i1	Vigun07g272000	Vigun07g272000.1	0	1296	Vu07	38766939	38768234	0	PTHR34956,PTHR34956:SF1	0	0	0
Vung18665|c0_g2_i6	Vigun03g160600	Vigun03g160600.1	(1 of 2) PTHR31062:SF44 - XYLOGLUCAN ENDOTRANSGLUCOSYLASE/HYDROLASE PROTEIN 27-RELATED	2632	Vu03	17742883	17745514	PF06955,PF00722	PTHR31062,PTHR31062:SF44	2.4.1.207	K08235	GO:0048046,GO:0016762,GO:0006073,GO:0005618,GO:0005975,GO:0004553
Vung78590|c0_g1_i1	Vigun10g157500	Vigun10g157500.1	0	1876	Vu10	37698827	37700702	0	PTHR34206,PTHR34206:SF1	0	0	0
Vung157505|c0_g2_i2	Vigun03g062400	Vigun03g062400.1	(1 of 101) PF02365 - No apical meristem (NAM) protein (NAM)	1642	Vu03	5136302	5137943	PF02365	PTHR31719,PTHR31719:SF20	0	0	GO:0006355,GO:0003677
Vung40284|c0_g1_i9	Vigun04g004700	Vigun04g004700.1	(1 of 1) 2.3.2.15//2.3.2.2//3.4.19.13 - Glutathione gamma-glutamylcysteinyltransferase / Phytochelatin synthase // Gamma-glutamyltransferase / Glutamyl transpeptidase // Glutathione hydrolase / Glutathionase	4421	Vu04	310238	314658	PF01019	PTHR11686,PTHR11686:SF29	2.3.2.15,3.4.19.13,2.3.2.2	K18592	GO:0006749,GO:0003840
Vung82533|c0_g1_i3	Vigun06g089700	Vigun06g089700.3	(1 of 2) PTHR11208//PTHR11208:SF42 - RNA-BINDING PROTEIN RELATED // SUBFAMILY NOT NAMED	4063	Vu06	22196738	22200800	0	PTHR11208,PTHR11208:SF42	0	K14945	0
Vung126738|c0_g2_i6	Vigun11g189800	Vigun11g189800.1	(1 of 10) KOG2922 - Uncharacterized conserved protein	3902	Vu11	38937223	38941124	PF05653	PTHR12570,PTHR12570:SF11	0	0	GO:0016021,GO:0015693,GO:0015095
Vung30164|c2_g1_i1	Vigun07g138200	Vigun07g138200.2	(1 of 1) PTHR10804//PTHR10804:SF17 - PROTEASE FAMILY M24 METHIONYL AMINOPEPTIDASE, AMINOPEPTIDASE P // XAA-PRO AMINOPEPTIDASE 3-RELATED	13532	Vu07	24799348	24812879	PF05195,PF00557	PTHR10804,PTHR10804:SF17	3.4.11.9	K01262	GO:0030145,GO:0004177
Vung56061|c0_g1_i1	Vigun02g054200	Vigun02g054200.1	(1 of 22) PF04398 - Protein of unknown function, DUF538 (DUF538)	1876	Vu02	19725097	19726972	PF04398	PTHR31676,PTHR31676:SF5	0	0	0
Vung42045|c1_g1_i8	Vigun11g031500	Vigun11g031500.1	(1 of 2) PTHR23091//PTHR23091:SF4 - N-TERMINAL ACETYLTRANSFERASE // ARD1 HOMOLOG A, N-ACETYLTRANSFERASE	4793	Vu11	4132331	4137123	PF00583	PTHR23091,PTHR23091:SF4	2.3.1.88	K00670	GO:0008080
Vung54304|c0_g1_i2	Vigun02g014100	Vigun02g014100.1	(1 of 4) PTHR31969//PTHR31969:SF1 - FAMILY NOT NAMED // GEM-LIKE PROTEIN 4-RELATED	1857	Vu02	5225175	5227031	PF02893	PTHR31969,PTHR31969:SF1	0	0	0
Vung145407|c0_g2_i4	Vigun07g073000	Vigun07g073000.1	(1 of 2) PTHR22814:SF113 - HEAVY-METAL-ASSOCIATED DOMAIN-CONTAINING PROTEIN-RELATED	2054	Vu07	9267334	9269387	PF00403	PTHR22814,PTHR22814:SF113	0	0	GO:0046872,GO:0030001
Vung32691|c0_g1_i2	Vigun10g027600	Vigun10g027600.1	(1 of 1) 4.1.1.97 - 2-oxo-4-hydroxy-4-carboxy-5-ureidoimidazoline decarboxylase / OHCU decarboxylase	3921	Vu10	3337453	3341373	PF00576,PF09349	PTHR10395,PTHR10395:SF7	3.5.2.17,4.1.1.97	K13484	0
Vung111131|c0_g2_i2	Vigun06g152300	Vigun06g152300.1	0	952	Vu06	27654337	27655288	0	PTHR34125	0	0	0
Vung74297|c1_g1_i3	Vigun06g134000	Vigun06g134000.2	(1 of 1) PTHR11934//PTHR11934:SF8 - RIBOSE-5-PHOSPHATE ISOMERASE // RIBOSE-5-PHOSPHATE ISOMERASE 4, CHLOROPLASTIC-RELATED	4806	Vu06	26031565	26036370	PF06026	PTHR11934,PTHR11934:SF8	5.3.1.6	0	GO:0009052,GO:0004751
Vung73002|c3_g2_i9	Vigun03g363800	Vigun03g363800.1	(1 of 2) PTHR24006//PTHR24006:SF451 - FAMILY NOT NAMED // UBIQUITIN CARBOXYL-TERMINAL HYDROLASE	9267	Vu03	56739792	56749058	PF13516,PF13855	PTHR24006,PTHR24006:SF451	0	0	GO:0005515
Vung56946|c0_g1_i7	Vigun03g001500	Vigun03g001500.1	(1 of 5) PTHR10161:SF14 - PURPLE ACID PHOSPHATASE 4-RELATED	2097	Vu03	121369	123465	PF00149	PTHR10161,PTHR10161:SF14	3.1.3.2	0	GO:0016787
Vung159416|c0_g1_i1	Vigun08g123900	Vigun08g123900.1	(1 of 1) PTHR33405:SF1 - PROTEIN FLC EXPRESSOR	4619	Vu08	29395521	29400139	0	PTHR33405,PTHR33405:SF1	0	0	0
Vung57799|c4_g1_i3	Vigun10g175300	Vigun10g175300.1	(1 of 6) K13248 - pyridoxal phosphate phosphatase PHOSPHO2 (PHOSPHO2)	2369	Vu10	39380140	39382508	PF06888	PTHR20889,PTHR20889:SF4	3.6.1.1	K13248	GO:0016791,GO:0008152
Vung81681|c3_g4_i17	Vigun06g030300	Vigun06g030300.3	(1 of 1) 2.6.1.44//2.6.1.45//2.6.1.51 - Alanine--glyoxylate transaminase / Alanine--glyoxylate aminotransferase // Serine--glyoxylate transaminase / SGAT // Serine--pyruvate transaminase / Serine--pyruvate aminotransferase	5923	Vu06	13359537	13365459	PF00266	PTHR21152,PTHR21152:SF21	2.6.1.51,2.6.1.44,2.6.1.45	K00830	0
Vung133892|c1_g1_i3	Vigun03g348900	Vigun03g348900.2	(1 of 2) PF10269//PF13920 - Transmembrane Fragile-X-F protein (Tmemb_185A) // Zinc finger, C3HC4 type (RING finger) (zf-C3HC4_3)	7979	Vu03	54930915	54938893	PF13920,PF10269	PTHR10044	0	0	0
Vung105448|c1_g1_i1	Vigun05g102000	Vigun05g102000.2	(1 of 2) 3.1.1.2 - Arylesterase / Paraoxonase	12311	Vu05	10136723	10149033	PF00657	PTHR14209,PTHR14209:SF10	3.1.1.2	0	GO:0016788
Vung109905|c1_g1_i3	Vigun03g429000	Vigun03g429000.2	(1 of 1) K01006 - pyruvate, orthophosphate dikinase (ppdK)	8338	Vu03	63348496	63356833	PF00391,PF01326,PF02896	PTHR22931,PTHR22931:SF9	2.7.9.1	0	GO:0016772,GO:0016310,GO:0016301,GO:0005524,GO:0050242,GO:0006090
Vung333|c2_g3_i1	Vigun08g001500	Vigun08g001500.3	(1 of 1) PTHR24413:SF79 - BTB/POZ DOMAIN-CONTAINING PROTEIN 9	6984	Vu08	174787	181770	PF07707,PF00754,PF12248,PF00651	PTHR24413,PTHR24413:SF79	0	0	GO:0005515
Vung9332|c1_g1_i4	Vigun11g152600	Vigun11g152600.2	(1 of 2) PTHR10641//PTHR10641:SF484 - MYB-LIKE DNA-BINDING PROTEIN MYB // TRANSCRIPTION FACTOR MYB48-RELATED	1495	Vu11	36234007	36235501	0	0	0	0	0
Vung333|c2_g3_i9	Vigun08g001500	Vigun08g001500.2	(1 of 1) PTHR24413:SF79 - BTB/POZ DOMAIN-CONTAINING PROTEIN 9	6984	Vu08	174787	181770	PF07707,PF00754,PF00651	PTHR24413,PTHR24413:SF79	0	0	GO:0005515
Vung88717|c0_g1_i1	Vigun05g248400	Vigun05g248400.1	(1 of 2) PTHR33083//PTHR33083:SF9 - FAMILY NOT NAMED // EMB|CAB72159.1	1532	Vu05	44220445	44221976	PF04520	PTHR33083,PTHR33083:SF9	0	0	0
Vung74852|c0_g1_i1	Vigun04g051500	Vigun04g051500.1	0	2486	Vu04	4674325	4676810	0	0	0	0	0
Vung74852|c0_g1_i2	Vigun04g051500	Vigun04g051500.1	0	2486	Vu04	4674325	4676810	0	0	0	0	0
Vung122852|c0_g1_i5	Vigun03g096300	Vigun03g096300.6	(1 of 1) PTHR13194:SF19 - NAD(P)-BINDING ROSSMANN-FOLD SUPERFAMILY PROTEIN	5977	Vu03	8132133	8138109	PF05368,PF13460,PF08547	PTHR13194,PTHR13194:SF19	0	0	0
Vung77000|c0_g1_i1	Vigun06g060800	Vigun06g060800.2	(1 of 138) KOG0156 - Cytochrome P450 CYP2 subfamily	1942	Vu06	18857644	18859585	PF00067	PTHR24298,PTHR24298:SF159	0	0	GO:0055114,GO:0020037,GO:0016705,GO:0005506
Vung10176|c0_g3_i1	Vigun03g287700	Vigun03g287700.1	(1 of 2) PTHR36366//PTHR36366:SF1 - FAMILY NOT NAMED // PROTEIN RDM1	1853	Vu03	46939997	46941849	PF09187	PTHR36366,PTHR36366:SF1	0	0	GO:0044030,GO:0005634
Vung89041|c1_g3_i5	Vigun03g298400	Vigun03g298400.1	(1 of 4) PTHR10071//PTHR10071:SF159 - TRANSCRIPTION FACTOR GATA GATA BINDING FACTOR // GATA TRANSCRIPTION FACTOR 26-RELATED	6037	Vu03	48609919	48615955	PF13919,PF00320	PTHR10071,PTHR10071:SF159	0	0	GO:0043565,GO:0008270,GO:0006355,GO:0003700
Vung164670|c0_g1_i1	Vigun03g014800	Vigun03g014800.1	(1 of 2) PTHR31707//PTHR31707:SF27 - FAMILY NOT NAMED // PECTINESTERASE/PECTINESTERASE INHIBITOR 6-RELATED	4021	Vu03	1015325	1019345	PF04043,PF01095	PTHR31707,PTHR31707:SF27	3.1.1.11	K01051	GO:0004857,GO:0042545,GO:0030599,GO:0005618
Vung81606|c0_g2_i4	Vigun06g199300	Vigun06g199300.1	(1 of 4) PF05564 - Dormancy/auxin associated protein (Auxin_repressed)	1461	Vu06	31453252	31454712	PF05564	PTHR33565,PTHR33565:SF2	0	0	0
Vung8580|c2_g1_i3	Vigun07g194500	Vigun07g194500.1	(1 of 3) KOG2816 - Predicted transporter ADD1 (major facilitator superfamily)	5484	Vu07	31373678	31379161	PF07690	PTHR23504,PTHR23504:SF35	0	0	GO:0055085,GO:0016021
Vung162290|c0_g1_i4	Vigun06g198000	Vigun06g198000.1	(1 of 1) K03024 - DNA-directed RNA polymerase III subunit RPC7 (RPC7, POLR3G)	4846	Vu06	31340688	31345533	PF11705	0	0	K03024	GO:0006359
Vung8003|c0_g1_i1	Vigun11g113300	Vigun11g113300.1	0	791	Vu11	31607890	31608680	0	PTHR34558,PTHR34558:SF2	0	0	0
Vung42811|c0_g1_i4	Vigun09g125500	Vigun09g125500.1	(1 of 1) PTHR24348:SF24 - PROTEIN KINASE FAMILY PROTEIN	2546	Vu09	27848711	27851256	PF06293	PTHR24348,PTHR24348:SF24	2.7.11.1	K08269	GO:0016773,GO:0016020,GO:0005524
Vung129014|c5_g2_i6	Vigun04g086900	Vigun04g086900.1	(1 of 38) PTHR11017//PTHR11017:SF171 - LEUCINE-RICH REPEAT-CONTAINING PROTEIN // SUBFAMILY NOT NAMED	4374	Vu04	14750155	14754528	PF13676,PF00931	PTHR11017,PTHR11017:SF171	0	0	GO:0007165,GO:0005515,GO:0043531
Vung34525|c0_g1_i4	Vigun09g032900	Vigun09g032900.2	(1 of 5) PTHR23421//PTHR23421:SF74 - BETA-GALACTOSIDASE RELATED // BETA-GALACTOSIDASE 1	5629	Vu09	2832456	2838084	PF01301	PTHR23421,PTHR23421:SF74	3.2.1.23	0	GO:0005975,GO:0004553
Vung333|c2_g3_i12	Vigun08g001500	Vigun08g001500.1	(1 of 1) PTHR24413:SF79 - BTB/POZ DOMAIN-CONTAINING PROTEIN 9	6984	Vu08	174787	181770	PF07707,PF00754,PF12248,PF00651	PTHR24413,PTHR24413:SF79	0	0	GO:0005515
Vung138642|c0_g1_i7	Vigun10g181600	Vigun10g181600.1	(1 of 2) PTHR31734:SF5 - AUXIN-RESPONSIVE PROTEIN IAA27	2587	Vu10	39913601	39916187	PF02309	PTHR31734,PTHR31734:SF5	0	K14484	GO:0006355,GO:0005634
Vung66857|c2_g1_i2	Vigun09g075100	Vigun09g075100.1	(1 of 7) PTHR31089:SF4 - CYCLIC DOF FACTOR 2-RELATED	3739	Vu09	8479998	8483736	PF02701	PTHR31089,PTHR31089:SF4	0	0	GO:0006355,GO:0003677
Vung40932|c1_g1_i7	Vigun10g176800	Vigun10g176800.2	(1 of 2) PTHR11014//PTHR11014:SF55 - PEPTIDASE M20 FAMILY MEMBER // IAA-AMINO ACID HYDROLASE ILR1-LIKE 1-RELATED	5566	Vu10	39517011	39522576	PF07687,PF01546	PTHR11014,PTHR11014:SF55	0	0	GO:0016787,GO:0008152
Vung164871|c3_g1_i7	Vigun05g001900	Vigun05g001900.2	(1 of 5) PTHR24064:SF113 - INOSITOL TRANSPORTER 1	2912	Vu05	154056	156967	PF00083	PTHR24064,PTHR24064:SF113	0	K08150	GO:0055085,GO:0022857,GO:0016021
Vung150148|c0_g1_i1	Vigun05g219300	Vigun05g219300.1	(1 of 13) PF12609 - Wound-induced protein (DUF3774)	889	Vu05	41102547	41103435	PF12609	PTHR33090	0	0	0
Vung72777|c0_g1_i6	Vigun11g056500	Vigun11g056500.1	(1 of 2) K10580 - ubiquitin-conjugating enzyme E2 N (UBE2N, BLU, UBC13)	7882	Vu11	11116455	11124336	PF00179	PTHR24067,PTHR24067:SF159	6.3.2.19	K10580	0
Vung74297|c1_g1_i2	Vigun06g134000	Vigun06g134000.2	(1 of 1) PTHR11934//PTHR11934:SF8 - RIBOSE-5-PHOSPHATE ISOMERASE // RIBOSE-5-PHOSPHATE ISOMERASE 4, CHLOROPLASTIC-RELATED	4806	Vu06	26031565	26036370	PF06026	PTHR11934,PTHR11934:SF8	5.3.1.6	0	GO:0009052,GO:0004751
Vung8580|c1_g1_i2	Vigun08g162300	Vigun08g162300.2	(1 of 3) PTHR12565//PTHR12565:SF181 - STEROL REGULATORY ELEMENT-BINDING PROTEIN // SUBFAMILY NOT NAMED	3164	Vu08	33491774	33494937	PF00010	PTHR12565,PTHR12565:SF181	0	0	GO:0046983
Vung30757|c1_g1_i14	Vigun08g002200	Vigun08g002200.2	(1 of 1) PTHR10357//PTHR10357:SF118 - ALPHA-AMYLASE // ALPHA-AMYLASE 2-RELATED	3689	Vu08	257337	261025	PF00128,PF07821	PTHR10357,PTHR10357:SF118	3.2.1.1	K01176	GO:0043169,GO:0005975,GO:0003824,GO:0005509,GO:0004556
Vung90259|c1_g1_i12	Vigun07g107900	Vigun07g107900.2	(1 of 1) K01968 - 3-methylcrotonyl-CoA carboxylase alpha subunit (E6.4.1.4A)	11283	Vu07	19905141	19916423	PF00364,PF02785,PF02786	PTHR18866	6.4.1.4	0	GO:0005524
Vung29707|c0_g1_i1	Vigun05g193600	Vigun05g193600.2	0	1539	Vu05	37536548	37538086	0	PTHR34274	0	0	0
Vung7141|c3_g3_i8	Vigun11g036500	Vigun11g036500.1	(1 of 4) PTHR11562:SF20 - METAL TOLERANCE PROTEIN 10-RELATED	8372	Vu11	4895276	4903647	PF16916,PF01545	PTHR11562,PTHR11562:SF20	0	0	GO:0055085,GO:0016021,GO:0008324,GO:0006812
Vung86220|c0_g2_i1	Vigun08g014300	Vigun08g014300.1	0	1456	Vu08	1222273	1223728	0	PTHR33872,PTHR33872:SF2	0	0	0
Vung7224|c0_g2_i2	Vigun02g171300	Vigun02g171300.6	(1 of 1) PTHR12357//PTHR12357:SF32 - YTH YT521-B HOMOLOGY DOMAIN-CONTAINING // YTH FAMILY PROTEIN	4136	Vu02	31417914	31422049	PF04146	PTHR12357,PTHR12357:SF32	0	0	0
Vung116362|c0_g1_i1	Vigun05g198000	Vigun05g198000.1	0	745	Vu05	38335509	38336253	0	PTHR33320,PTHR33320:SF1	0	0	0
Vung151937|c0_g1_i1	Vigun02g175000	Vigun02g175000.1	(1 of 3) PTHR22950//PTHR22950:SF269 - AMINO ACID TRANSPORTER // EXPRESSED PROTEIN	4458	Vu02	31730137	31734594	PF01490	PTHR22950,PTHR22950:SF269	0	K15015	0
Vung137851|c0_g1_i1	Vigun11g057900	Vigun11g057900.1	(1 of 1) PTHR34659//PTHR34659:SF1 - FAMILY NOT NAMED // F3N23.33 PROTEIN	5156	Vu11	12133765	12138920	0	PTHR34659,PTHR34659:SF1	0	0	0
Vung24468|c0_g1_i1	Vigun02g168900	Vigun02g168900.1	0	2293	Vu02	31221925	31224217	0	PTHR36333,PTHR36333:SF1	0	0	0
Vung136076|c0_g1_i1	Vigun03g041200	Vigun03g041200.1	(1 of 1) PTHR22814//PTHR22814:SF127 - COPPER TRANSPORT PROTEIN ATOX1-RELATED // SUBFAMILY NOT NAMED	2333	Vu03	3236896	3239228	PF00403	PTHR22814,PTHR22814:SF127	0	0	GO:0046872,GO:0030001
Vung87283|c0_g6_i1	Vigun03g251700	Vigun03g251700.1	(1 of 4) 1.1.1.41 - Isocitrate dehydrogenase (NAD(+)) / Nicotinamide adenine dinucleotide isocitrate dehydrogenase	4011	Vu03	41781521	41785531	PF00180	PTHR11835,PTHR11835:SF51	1.1.1.41	K00030	GO:0055114,GO:0016616,GO:0051287,GO:0000287
Vung57149|c5_g1_i5	Vigun07g162300	Vigun07g162300.1	(1 of 9) PF05212 - Protein of unknown function (DUF707) (DUF707)	4506	Vu07	27363035	27367540	PF05212	PTHR31210,PTHR31210:SF4	0	0	0
Vung71907|c1_g1_i6	Vigun09g154800	Vigun09g154800.1	(1 of 2) PTHR10219:SF34 - GENOMIC DNA, CHROMOSOME 3, P1 CLONE: MXL8	2079	Vu09	32020744	32022822	PF08718	PTHR10219,PTHR10219:SF34	0	0	GO:0051861,GO:0046836,GO:0017089,GO:0005737
Vung124543|c0_g4_i1	Vigun03g290600	Vigun03g290600.1	(1 of 2) PTHR31062//PTHR31062:SF48 - FAMILY NOT NAMED // XYLOGLUCAN ENDOTRANSGLUCOSYLASE/HYDROLASE PROTEIN 6-RELATED	1948	Vu03	47357746	47359693	PF06955,PF00722	PTHR31062,PTHR31062:SF48	2.4.1.207,3.2.1.151	K08235	GO:0048046,GO:0016762,GO:0006073,GO:0005618,GO:0005975,GO:0004553
Vung29291|c1_g1_i5	Vigun05g291400	Vigun05g291400.2	(1 of 3) 3.5.1.88 - Peptide deformylase / Polypeptide deformylase	2762	Vu05	47756756	47759517	PF01327	PTHR10458,PTHR10458:SF11	3.5.1.88	K01462	GO:0042586,GO:0005506
Vung42155|c1_g2_i2	Vigun09g016800	Vigun09g016800.2	(1 of 2) PTHR13780//PTHR13780:SF43 - AMP-ACTIVATED PROTEIN KINASE, GAMMA REGULATORY SUBUNIT // SUBFAMILY NOT NAMED	9600	Vu09	1248652	1258251	PF00571,PF16561	PTHR13780,PTHR13780:SF43	0	0	0
Vung80268|c4_g1_i3	Vigun02g117600	Vigun02g117600.2	(1 of 3) 2.8.1.1 - Thiosulfate sulfurtransferase / Thiosulfate thiotransferase	2915	Vu02	27042023	27044937	PF00581	PTHR12231	2.8.1.1	0	0
Vung55863|c0_g2_i7	Vigun09g147400	Vigun09g147400.1	(1 of 1) PTHR13832:SF218 - PROTEIN PHOSPHATASE 2C 57	4271	Vu09	31106950	31111220	PF13672	PTHR13832,PTHR13832:SF218	3.1.3.16	0	GO:0006470,GO:0004722
Vung80268|c4_g1_i6	Vigun02g117600	Vigun02g117600.1	(1 of 3) 2.8.1.1 - Thiosulfate sulfurtransferase / Thiosulfate thiotransferase	2915	Vu02	27042023	27044937	PF00581	PTHR12231	2.8.1.1	0	0
Vung56061|c0_g1_i2	Vigun02g054200	Vigun02g054200.1	(1 of 22) PF04398 - Protein of unknown function, DUF538 (DUF538)	1876	Vu02	19725097	19726972	PF04398	PTHR31676,PTHR31676:SF5	0	0	0
Vung5031|c0_g3_i29	Vigun08g036100	Vigun08g036100.1	(1 of 2) PTHR12000//PTHR12000:SF13 - HEMOGLOBINASE FAMILY MEMBER // SUBFAMILY NOT NAMED	6870	Vu08	3471918	3478787	PF01650	PTHR12000,PTHR12000:SF13	3.4.22.34	K01369	GO:0008233,GO:0006508
Vung65056|c3_g2_i1	Vigun03g109900	Vigun03g109900.2	(1 of 2) PTHR15315//PTHR15315:SF20 - RING FINGER PROTEIN 41, 151 // SUBFAMILY NOT NAMED	3611	Vu03	9838741	9842351	0	PTHR15315,PTHR15315:SF20	0	0	0
Vung89545|c1_g1_i16	Vigun09g102500	Vigun09g102500.1	(1 of 2) PTHR13780//PTHR13780:SF36 - AMP-ACTIVATED PROTEIN KINASE, GAMMA REGULATORY SUBUNIT // SNF1-RELATED PROTEIN KINASE REGULATORY SUBUNIT GAMMA-1	4449	Vu09	17579111	17583559	PF00571	PTHR13780,PTHR13780:SF36	0	0	0
Vung77309|c0_g1_i8	Vigun03g183100	Vigun03g183100.1	0	1683	Vu03	23638253	23639935	0	PTHR36345,PTHR36345:SF1	0	0	0
Vung53871|c1_g1_i8	Vigun07g064300	Vigun07g064300.1	(1 of 1) PTHR10516:SF323 - PEPTIDYL-PROLYL CIS-TRANS ISOMERASE FKBP16-4, CHLOROPLASTIC	3065	Vu07	7453125	7456189	PF00254	PTHR10516,PTHR10516:SF323	5.2.1.8	0	GO:0006457
Vung21908|c0_g1_i1	Vigun09g140400	Vigun09g140400.1	(1 of 1) PTHR33231//PTHR33231:SF1 - FAMILY NOT NAMED // 30S RIBOSOMAL PROTEIN-RELATED	2288	Vu09	30243309	30245596	PF02482,PF16321	PTHR33231,PTHR33231:SF1	0	0	GO:0044238
Vung61958|c0_g2_i1	Vigun11g107900	Vigun11g107900.1	(1 of 1) PTHR11746//PTHR11746:SF111 - O-METHYLTRANSFERASE // O-METHYLTRANSFERASE FAMILY PROTEIN	8113	Vu11	30722798	30730910	PF08100,PF00891	PTHR11746,PTHR11746:SF111	0	0	GO:0046983,GO:0008171
Vung50890|c4_g3_i3	Vigun03g020100	Vigun03g020100.1	(1 of 4) K12355 - coniferyl-aldehyde dehydrogenase (REF1)	4884	Vu03	1465191	1470074	PF00171	PTHR11699,PTHR11699:SF182	1.2.1.5	K12355	GO:0055114,GO:0016491,GO:0008152
Vung88311|c1_g1_i3	Vigun09g075400	Vigun09g075400.1	(1 of 1) PTHR10438:SF263 - THIOREDOXIN-LIKE 1-2, CHLOROPLASTIC	2103	Vu09	8555235	8557337	PF00085	PTHR10438,PTHR10438:SF263	3.5.1.52	0	GO:0045454,GO:0015035,GO:0006662
Vung153288|c0_g1_i1	Vigun08g196000	Vigun08g196000.1	(1 of 1) PTHR11527//PTHR11527:SF134 - SMALL HEAT-SHOCK PROTEIN HSP20 FAMILY // HEAT SHOCK PROTEIN 42	2915	Vu08	36219153	36222067	PF00011	PTHR11527,PTHR11527:SF134	0	K13993	0
Vung8580|c2_g1_i10	Vigun07g194500	Vigun07g194500.1	(1 of 3) KOG2816 - Predicted transporter ADD1 (major facilitator superfamily)	5484	Vu07	31373678	31379161	PF07690	PTHR23504,PTHR23504:SF35	0	0	GO:0055085,GO:0016021
Vung36392|c1_g1_i1	Vigun09g128400	Vigun09g128400.1	(1 of 92) PF03106 - WRKY DNA -binding domain (WRKY)	2632	Vu09	28541037	28543668	PF03106	PTHR31221,PTHR31221:SF5	0	0	GO:0043565,GO:0006355,GO:0003700
Vung24894|c0_g1_i2	Vigun02g091200	Vigun02g091200.1	0	1018	Vu02	24620634	24621651	0	0	0	0	0
Vung169|c1_g1_i7	Vigun09g152000	Vigun09g152000.1	(1 of 2) PTHR10217//PTHR10217:SF527 - VOLTAGE AND LIGAND GATED POTASSIUM CHANNEL // CYCLIC NUCLEOTIDE-GATED ION CHANNEL 1	7297	Vu09	31625503	31632799	PF00027,PF00520	PTHR10217,PTHR10217:SF527	0	K05391	GO:0055085,GO:0016020,GO:0006811,GO:0005216
Vung27152|c0_g1_i2	Vigun03g014800	Vigun03g014800.1	(1 of 2) PTHR31707//PTHR31707:SF27 - FAMILY NOT NAMED // PECTINESTERASE/PECTINESTERASE INHIBITOR 6-RELATED	4021	Vu03	1015325	1019345	PF04043,PF01095	PTHR31707,PTHR31707:SF27	3.1.1.11	K01051	GO:0004857,GO:0042545,GO:0030599,GO:0005618
Vung33200|c0_g1_i1	Vigun01g078600	Vigun01g078600.2	(1 of 1) PTHR36762:SF2 - A.THALIANA MRNA (ORF19) FROM CHROMOSOME III	1060	Vu01	22132057	22133116	PF07207	PTHR36762,PTHR36762:SF2	0	0	0
Vung39949|c0_g1_i2	VigunL042200	VigunL042200.1	(1 of 10) K02986 - small subunit ribosomal protein S4 (RP-S4, rpsD)	606	contig_3	414387	414992	PF01479,PF00163	PTHR11831	0	K02986	GO:0003723,GO:0019843,GO:0005622
Vung138102|c0_g2_i3	Vigun01g025300	Vigun01g025300.1	(1 of 4) PTHR10638:SF39 - AMINE OXIDASE-RELATED	2880	Vu01	2884803	2887682	PF02728,PF02727,PF01179	PTHR10638,PTHR10638:SF39	1.4.3.21	0	GO:0055114,GO:0048038,GO:0009308,GO:0008131,GO:0005507
Vung25395|c0_g1_i3	Vigun06g112700	Vigun06g112700.1	(1 of 1) PTHR22952//PTHR22952:SF90 - CAMP-RESPONSE ELEMENT BINDING PROTEIN-RELATED // BASIC LEUCINE ZIPPER 63	2910	Vu06	24120687	24123596	PF00170,PF12498	PTHR22952,PTHR22952:SF90	0	0	GO:0043565,GO:0006355,GO:0003700
Vung97159|c0_g1_i2	Vigun03g434100	Vigun03g434100.1	0	1819	Vu03	63823044	63824862	0	PTHR34956,PTHR34956:SF2	0	0	0
Vung133892|c1_g1_i7	Vigun03g348900	Vigun03g348900.2	(1 of 2) PF10269//PF13920 - Transmembrane Fragile-X-F protein (Tmemb_185A) // Zinc finger, C3HC4 type (RING finger) (zf-C3HC4_3)	7979	Vu03	54930915	54938893	PF13920,PF10269	PTHR10044	0	0	0
Vung100597|c0_g1_i2	Vigun03g014300	Vigun03g014300.1	(1 of 2) PTHR15907//PTHR15907:SF47 - FAMILY NOT NAMED // PROTEIN PLANT CADMIUM RESISTANCE 11-RELATED	1177	Vu03	960131	961307	PF04749	PTHR15907,PTHR15907:SF47	0	0	0
Vung114487|c1_g1_i3	Vigun08g108100	Vigun08g108100.1	(1 of 1) PTHR11002:SF19 - CARBONIC ANHYDRASE	2654	Vu08	26902566	26905219	PF00484	PTHR11002,PTHR11002:SF19	4.2.1.1	K01673	GO:0008270,GO:0004089
Vung132645|c0_g1_i1	Vigun08g063100	Vigun08g063100.1	(1 of 1) PTHR33638:SF1 - SELENOPROTEIN H	2355	Vu08	8674672	8677026	0	PTHR33638,PTHR33638:SF1	0	0	0
Vung7141|c3_g3_i4	Vigun11g036500	Vigun11g036500.1	(1 of 4) PTHR11562:SF20 - METAL TOLERANCE PROTEIN 10-RELATED	8372	Vu11	4895276	4903647	PF16916,PF01545	PTHR11562,PTHR11562:SF20	0	0	GO:0055085,GO:0016021,GO:0008324,GO:0006812
Vung89545|c2_g1_i1	Vigun09g102500	Vigun09g102500.1	(1 of 2) PTHR13780//PTHR13780:SF36 - AMP-ACTIVATED PROTEIN KINASE, GAMMA REGULATORY SUBUNIT // SNF1-RELATED PROTEIN KINASE REGULATORY SUBUNIT GAMMA-1	4449	Vu09	17579111	17583559	PF00571	PTHR13780,PTHR13780:SF36	0	0	0
Vung15176|c0_g1_i1	Vigun06g063100	Vigun06g063100.1	(1 of 3) K08065 - nuclear transcription Y subunit beta (NFYB)	1882	Vu06	19176323	19178204	PF00808	PTHR11064,PTHR11064:SF45	0	K08065	0
Vung59466|c0_g1_i2	Vigun11g139600	Vigun11g139600.1	0	885	Vu11	34906746	34907630	0	0	0	0	0
Vung65067|c0_g1_i1	Vigun01g066700	Vigun01g066700.1	(1 of 1) PTHR10742//PTHR10742:SF229 - AMINE OXIDASE // PROTOPORPHYRINOGEN OXIDASE 2, CHLOROPLASTIC/MITOCHONDRIAL	25944	Vu01	17860996	17886939	PF13450	PTHR10742,PTHR10742:SF229	1.3.3.4	K00231	0
Vung164024|c0_g1_i1	Vigun01g070700	Vigun01g070700.1	(1 of 10) PF11820 - Protein of unknown function (DUF3339) (DUF3339)	765	Vu01	19134404	19135168	PF11820	PTHR33128,PTHR33128:SF14	0	0	0
Vung165509|c4_g2_i4	Vigun05g001000	Vigun05g001000.1	(1 of 101) PF02365 - No apical meristem (NAM) protein (NAM)	3235	Vu05	97747	100981	PF02365	PTHR31989	0	0	GO:0006355,GO:0003677
Vung167591|c4_g3_i1	Vigun07g107500	Vigun07g107500.1	(1 of 2) PTHR11814//PTHR11814:SF60 - SULFATE TRANSPORTER // SULFATE TRANSPORTER 3.1-RELATED	6170	Vu07	19808741	19814910	PF01740,PF00916	PTHR11814,PTHR11814:SF60	0	K17471	GO:0016021,GO:0015116,GO:0008272,GO:0055085,GO:0016020,GO:0008271,GO:0009507
Vung46407|c1_g2_i3	Vigun03g287200	Vigun03g287200.2	(1 of 4) K07955 - ADP-ribosylation factor-like protein 8 (ARL8)	3172	Vu03	46909786	46912957	PF00071	PTHR11711,PTHR11711:SF178	0	K07955	GO:0007264,GO:0005525
Vung99371|c1_g1_i1	Vigun01g022900	Vigun01g022900.1	(1 of 7) PTHR31907:SF4 - MLP-LIKE PROTEIN 165-RELATED	1868	Vu01	2414248	2416115	PF10604	PTHR31907,PTHR31907:SF4	0	0	0
Vung10609|c4_g2_i9	Vigun03g072100	Vigun03g072100.2	(1 of 1) PTHR22952//PTHR22952:SF172 - CAMP-RESPONSE ELEMENT BINDING PROTEIN-RELATED // SUBFAMILY NOT NAMED	6074	Vu03	5927688	5933761	PF00170,PF14144	PTHR22952,PTHR22952:SF172	0	K14431	GO:0043565,GO:0006355,GO:0003700,GO:0006351
Vung114734|c1_g1_i6	Vigun09g153000	Vigun09g153000.1	(1 of 2) PTHR10791:SF28 - BIDIRECTIONAL SUGAR TRANSPORTER SWEET3	2185	Vu09	31786502	31788686	PF03083	PTHR10791,PTHR10791:SF28	0	K15382	0
Vung150182|c0_g1_i9	Vigun08g036200	Vigun08g036200.1	(1 of 2) K14291 - phosphorylated adapter RNA export protein (PHAX)	4381	Vu08	3482807	3487187	PF10258	PTHR13135	0	K14291	0
Vung8580|c2_g1_i7	Vigun07g194500	Vigun07g194500.1	(1 of 3) KOG2816 - Predicted transporter ADD1 (major facilitator superfamily)	5484	Vu07	31373678	31379161	PF07690	PTHR23504,PTHR23504:SF35	0	0	GO:0055085,GO:0016021
Vung111172|c0_g5_i6	Vigun06g233400	Vigun06g233400.1	(1 of 1) K11718 - UDP-glucose:glycoprotein glucosyltransferase (HUGT)	19350	Vu06	33930360	33949709	PF01501,PF06427	PTHR11226,PTHR11226:SF0	0	K11718	GO:0016757,GO:0006486,GO:0003980
Vung118463|c0_g1_i1	Vigun09g146500	Vigun09g146500.2	(1 of 11) KOG3399 - Predicted Yippee-type zinc-binding protein	2454	Vu09	30992334	30994787	PF03226	PTHR13848,PTHR13848:SF9	0	0	0
Vung119818|c1_g2_i5	Vigun03g433600	Vigun03g433600.1	(1 of 1) K17757 - ATP-dependent NAD(P)H-hydrate dehydratase (CARKD)	5644	Vu03	63753890	63759533	PF01256	PTHR12592,PTHR12592:SF0	4.2.1.93	K17757	GO:0052855
Vung136659|c3_g1_i14	Vigun03g429000	Vigun03g429000.2	(1 of 1) K01006 - pyruvate, orthophosphate dikinase (ppdK)	8338	Vu03	63348496	63356833	PF00391,PF01326,PF02896	PTHR22931,PTHR22931:SF9	2.7.9.1	0	GO:0016772,GO:0016310,GO:0016301,GO:0005524,GO:0050242,GO:0006090
Vung161286|c0_g1_i16	Vigun09g152100	Vigun09g152100.1	(1 of 1) PTHR24319:SF26 - PROTEIN DHS-1	5119	Vu09	31636688	31641806	PF00106	PTHR24319,PTHR24319:SF26	1.1.1.300	0	GO:0016491,GO:0008152
Vung138109|c0_g1_i3	Vigun01g060600	Vigun01g060600.1	(1 of 1) PTHR31744:SF5 - NAC DOMAIN-CONTAINING PROTEIN 21/22-RELATED	4323	Vu01	12677503	12681825	PF02365	PTHR31744,PTHR31744:SF5	0	0	GO:0006355,GO:0003677
Vung91451|c6_g2_i2	Vigun06g163800	Vigun06g163800.1	(1 of 4) PTHR10353//PTHR10353:SF27 - GLYCOSYL HYDROLASE // BETA-GLUCOSIDASE 45-RELATED	7102	Vu06	28605024	28612125	PF00232	PTHR10353,PTHR10353:SF27	3.2.1.21	K05350	GO:0005975,GO:0004553
Vung156049|c1_g2_i5	Vigun07g246500	Vigun07g246500.1	(1 of 42) PF01657//PF07714 - Salt stress response/antifungal (Stress-antifung) // Protein tyrosine kinase (Pkinase_Tyr)	3307	Vu07	36693200	36696506	PF01657,PF07714	PTHR27002	2.7.11.1	0	GO:0006468,GO:0004672
Vung28482|c1_g1_i3	Vigun05g112500	Vigun05g112500.2	0	3158	Vu05	11786130	11789287	0	PTHR33738,PTHR33738:SF3	0	0	0
Vung116325|c0_g2_i2	Vigun01g220200	Vigun01g220200.2	(1 of 2) PF00805 - Pentapeptide repeats (8 copies) (Pentapeptide)	2598	Vu01	39398835	39401432	PF00805	PTHR14136	0	0	0
Vung56670|c4_g2_i9	Vigun03g228000	Vigun03g228000.1	(1 of 3) PTHR11695:SF497 - CINNAMYL ALCOHOL DEHYDROGENASE 6-RELATED	2466	Vu03	37874382	37876847	PF00107,PF08240	PTHR11695,PTHR11695:SF497	1.1.1.195	0	GO:0055114,GO:0016491,GO:0008270
Vung149935|c1_g1_i1	Vigun10g197000	Vigun10g197000.1	(1 of 122) PTHR24078 - DNAJ HOMOLOG SUBFAMILY C MEMBER	1554	Vu10	41006848	41008401	PF00226	PTHR24078	0	0	0
Vung44809|c3_g1_i4	Vigun09g088200	Vigun09g088200.1	0	8238	Vu09	11993528	12001765	0	PTHR34677,PTHR34677:SF1	0	0	0
Vung53415|c0_g1_i2	Vigun06g171600	Vigun06g171600.1	(1 of 4) 1.8.4.12 - Peptide-methionine (R)-S-oxide reductase / Selenoprotein R	1581	Vu06	29297509	29299089	PF01641	PTHR10173,PTHR10173:SF19	1.8.4.12	K07305	GO:0055114,GO:0033743,GO:0030091,GO:0016671,GO:0006979
Vung136874|c0_g1_i1	Vigun07g117800	Vigun07g117800.1	0	492	Vu07	21817707	21818198	0	0	0	0	0
Vung109939|c0_g1_i2	Vigun07g205100	Vigun07g205100.1	(1 of 1) K02435 - aspartyl-tRNA(Asn)/glutamyl-tRNA(Gln) amidotransferase subunit C (gatC, GATC)	1942	Vu07	32658976	32660917	PF02686	PTHR13373,PTHR13373:SF22	0	K02435	GO:0006450
Vung68739|c4_g3_i1	Vigun04g194400	Vigun04g194400.2	(1 of 7) K07937//K07977 - ADP-ribosylation factor 1 (ARF1) // Arf/Sar family, other (ARF)	10928	Vu04	41894120	41905047	PF09439	PTHR11711,PTHR11711:SF181	0	K07937	0
Vung64975|c1_g2_i26	Vigun07g185500	Vigun07g185500.1	(1 of 2) PTHR11404//PTHR11404:SF24 - SUPEROXIDE DISMUTASE 2 // SUPEROXIDE DISMUTASE [FE] 2, CHLOROPLASTIC	3718	Vu07	30238936	30242653	PF00081,PF02777	PTHR11404,PTHR11404:SF24	1.15.1.1	K04564	GO:0055114,GO:0046872,GO:0006801,GO:0004784
Vung101242|c0_g1_i11	Vigun03g426300	Vigun03g426300.1	(1 of 52) PF12937 - F-box-like (F-box-like)	3023	Vu03	63160209	63163231	PF12937	PTHR16008,PTHR16008:SF5	0	0	GO:0005515
Vung111255|c1_g1_i1	Vigun02g109200	Vigun02g109200.4	(1 of 84) PF00892 - EamA-like transporter family (EamA)	3891	Vu02	26336415	26340305	PF00892	PTHR31218,PTHR31218:SF1	0	0	GO:0016021,GO:0016020,GO:0022857
Vung130774|c1_g1_i9	Vigun03g182100	Vigun03g182100.3	(1 of 1) PTHR16223:SF41 - BHLH TRANSCRIPTION FACTOR	4351	Vu03	23388763	23393113	0	PTHR16223,PTHR16223:SF41	0	0	0
Vung27152|c0_g3_i1	Vigun03g015100	Vigun03g015100.1	(1 of 2) PTHR31707//PTHR31707:SF27 - FAMILY NOT NAMED // PECTINESTERASE/PECTINESTERASE INHIBITOR 6-RELATED	3431	Vu03	1044533	1047963	PF04043,PF01095	PTHR31707,PTHR31707:SF27	3.1.1.11	K01051	GO:0004857,GO:0042545,GO:0030599,GO:0005618
Vung114487|c1_g1_i9	Vigun08g108100	Vigun08g108100.1	(1 of 1) PTHR11002:SF19 - CARBONIC ANHYDRASE	2654	Vu08	26902566	26905219	PF00484	PTHR11002,PTHR11002:SF19	4.2.1.1	K01673	GO:0008270,GO:0004089
Vung11181|c0_g3_i3	Vigun07g266300	Vigun07g266300.1	(1 of 14) PF06749 - Protein of unknown function (DUF1218) (DUF1218)	1451	Vu07	38174383	38175833	PF06749	PTHR31769,PTHR31769:SF3	0	0	0
Vung160614|c0_g1_i2	Vigun08g142200	Vigun08g142200.1	0	3097	Vu08	31465184	31468280	0	0	0	0	0
Vung21127|c0_g1_i2	Vigun01g152800	Vigun01g152800.1	(1 of 1) PTHR10286//PTHR10286:SF20 - INORGANIC PYROPHOSPHATASE // SUBFAMILY NOT NAMED	4553	Vu01	33518740	33523292	PF00719	PTHR10286,PTHR10286:SF20	3.6.1.1	K01507	GO:0006796,GO:0005737,GO:0004427,GO:0000287
Vung41050|c0_g2_i1	Vigun09g085000	Vigun09g085000.1	(1 of 2) PTHR14155//PTHR14155:SF103 - RING FINGER DOMAIN-CONTAINING // SUBFAMILY NOT NAMED	459	Vu09	10853046	10853504	PF13639	PTHR14155,PTHR14155:SF103	0	0	GO:0008270,GO:0005515
Vung7224|c0_g2_i15	Vigun02g171300	Vigun02g171300.5	(1 of 1) PTHR12357//PTHR12357:SF32 - YTH YT521-B HOMOLOGY DOMAIN-CONTAINING // YTH FAMILY PROTEIN	4136	Vu02	31417914	31422049	PF04146	PTHR12357,PTHR12357:SF32	0	0	0
Vung102985|c2_g1_i18	Vigun09g203200	Vigun09g203200.4	(1 of 1) PTHR21319:SF15 - CHY AND CTCHY AND RING-TYPE ZINC FINGER PROTEIN	8786	Vu09	37780333	37789118	PF13639,PF05495,PF14599	PTHR21319,PTHR21319:SF15	6.3.2.19	K10144	GO:0008270,GO:0005515
Vung16921|c0_g2_i1	Vigun02g170900	Vigun02g170900.7	(1 of 2) K14270 - aminotransferase (ACS10_12)	4168	Vu02	31394157	31398324	PF00155	PTHR11751,PTHR11751:SF411	4.4.1.14	0	GO:0030170,GO:0009058
Vung98617|c2_g1_i1	Vigun04g159500	Vigun04g159500.1	(1 of 1) PTHR11362//PTHR11362:SF22 - PHOSPHATIDYLETHANOLAMINE-BINDING PROTEIN // PROTEIN BROTHER OF FT AND TFL 1	1533	Vu04	38183549	38185081	PF01161	PTHR11362,PTHR11362:SF22	0	0	0
Vung58290|c0_g1_i4	Vigun07g175800	Vigun07g175800.2	(1 of 6) PTHR31358//PTHR31358:SF10 - FAMILY NOT NAMED // TARGETING PROTEIN FOR XKLP2-LIKE PROTEIN	4981	Vu07	29087942	29092922	PF06886	PTHR31358,PTHR31358:SF10	0	0	0
Vung81606|c0_g2_i3	Vigun06g199300	Vigun06g199300.1	(1 of 4) PF05564 - Dormancy/auxin associated protein (Auxin_repressed)	1461	Vu06	31453252	31454712	PF05564	PTHR33565,PTHR33565:SF2	0	0	0
Vung35607|c1_g2_i8	Vigun07g003500	Vigun07g003500.2	(1 of 2) PTHR12895:SF9 - DYMECLIN	7454	Vu07	275784	283237	PF09742	PTHR12895,PTHR12895:SF9	0	0	0
Vung117334|c0_g1_i1	Vigun06g108200	Vigun06g108200.1	(1 of 1) PTHR10910//PTHR10910:SF109 - EUKARYOTE SPECIFIC DSRNA BINDING PROTEIN // SUBFAMILY NOT NAMED	4434	Vu06	23734148	23738581	PF00035	PTHR10910,PTHR10910:SF109	0	0	0
Vung148107|c2_g3_i4	Vigun02g027400	Vigun02g027400.1	(1 of 3) PTHR31342:SF7 - PROTEIN CHUP1, CHLOROPLASTIC	10883	Vu02	9452240	9463122	0	PTHR31342,PTHR31342:SF7	0	0	0
Vung51297|c0_g1_i1	Vigun07g070900	Vigun07g070900.2	(1 of 3) PTHR31223//PTHR31223:SF17 - FAMILY NOT NAMED // CYTOKININ RIBOSIDE 5'-MONOPHOSPHATE PHOSPHORIBOHYDROLASE LOG3-RELATED	5602	Vu07	8801285	8806886	PF03641	PTHR31223,PTHR31223:SF17	0	K06966	0
Vung128650|c1_g2_i6	Vigun02g057900	Vigun02g057900.2	(1 of 2) KOG3292 - Predicted membrane protein	3838	Vu02	20266474	20270311	PF06127	PTHR28026,PTHR28026:SF4	0	0	0
Vung76210|c0_g1_i1	Vigun09g055200	Vigun09g055200.2	(1 of 2) PTHR12136//PTHR12136:SF49 - STEROIDOGENIC ACUTE REGULATORY PROTEIN STAR // SUBFAMILY NOT NAMED	12372	Vu09	5515805	5528176	PF01852,PF07059	PTHR12136,PTHR12136:SF49	0	0	GO:0008289
Vung80268|c4_g1_i4	Vigun02g117600	Vigun02g117600.1	(1 of 3) 2.8.1.1 - Thiosulfate sulfurtransferase / Thiosulfate thiotransferase	2915	Vu02	27042023	27044937	PF00581	PTHR12231	2.8.1.1	0	0
Vung107278|c0_g1_i6	Vigun04g006200	Vigun04g006200.1	(1 of 1) PTHR10404//PTHR10404:SF45 - N-ACETYLATED-ALPHA-LINKED ACIDIC DIPEPTIDASE // SUBFAMILY NOT NAMED	5064	Vu04	435752	440815	PF02225,PF04389,PF04253	PTHR10404,PTHR10404:SF45	3.4.17.11	K01301	0
Vung86220|c0_g2_i3	Vigun08g014300	Vigun08g014300.1	0	1456	Vu08	1222273	1223728	0	PTHR33872,PTHR33872:SF2	0	0	0
Vung165523|c3_g2_i1	Vigun09g037400	Vigun09g037400.1	(1 of 3) PTHR10641//PTHR10641:SF508 - MYB-LIKE DNA-BINDING PROTEIN MYB // SUBFAMILY NOT NAMED	2692	Vu09	3299965	3302656	PF00249	PTHR10641,PTHR10641:SF508	0	K09422	0
Vung76278|c1_g3_i2	Vigun06g169900	Vigun06g169900.1	(1 of 12) 5.4.99.39 - Beta-amyrin synthase / 2,3-oxidosqualene beta-amyrin cyclase	6629	Vu06	29146060	29152688	PF00432	PTHR11764,PTHR11764:SF16	5.4.99.39	0	GO:0003824
Vung157531|c0_g1_i1	Vigun03g221400	Vigun03g221400.1	(1 of 1) PTHR33264//PTHR33264:SF7 - FAMILY NOT NAMED // GENOMIC DNA, CHROMOSOME 3, BAC CLONE:T5M7	881	Vu03	36806446	36807326	0	PTHR33264,PTHR33264:SF7	0	0	0
Vung120449|c0_g1_i1	Vigun01g135700	Vigun01g135700.1	(1 of 19) PF04570 - zinc-finger of the FCS-type, C2-C2 (zf-FLZ)	2386	Vu01	31556541	31558926	PF04570	PTHR33059,PTHR33059:SF11	0	0	0
Vung137378|c0_g2_i4	Vigun04g087000	Vigun04g087000.2	(1 of 3) K12386 - cystinosin (CTNS)	3169	Vu04	14792471	14795639	PF04193	PTHR13131,PTHR13131:SF5	0	0	0
Vung57263|c0_g1_i1	Vigun11g197800	Vigun11g197800.1	0	384	Vu11	39667628	39668011	0	PTHR33306,PTHR33306:SF7	0	0	0
Vung29908|c2_g3_i13	Vigun04g185100	Vigun04g185100.1	(1 of 1) PTHR11373//PTHR11373:SF31 - SAM DOMAIN AND HD DOMAIN-CONTAINING PROTEIN-RELATED // SUBFAMILY NOT NAMED	6399	Vu04	40997626	41004024	PF01966	PTHR11373,PTHR11373:SF31	0	0	0
Vung22644|c0_g1_i1	Vigun05g136400	Vigun05g136400.1	(1 of 2) PTHR31808//PTHR31808:SF2 - FAMILY NOT NAMED // F21O3.2 PROTEIN-RELATED	2833	Vu05	16416072	16418904	PF05542	PTHR31808,PTHR31808:SF2	0	0	0
Vung45407|c0_g1_i1	Vigun04g158900	Vigun04g158900.1	(1 of 138) KOG0156 - Cytochrome P450 CYP2 subfamily	3726	Vu04	38090939	38094664	PF00067	PTHR24298,PTHR24298:SF117	0	0	GO:0055114,GO:0020037,GO:0016705,GO:0005506
Vung136659|c3_g1_i10	Vigun03g429000	Vigun03g429000.2	(1 of 1) K01006 - pyruvate, orthophosphate dikinase (ppdK)	8338	Vu03	63348496	63356833	PF00391,PF01326,PF02896	PTHR22931,PTHR22931:SF9	2.7.9.1	0	GO:0016772,GO:0016310,GO:0016301,GO:0005524,GO:0050242,GO:0006090
Vung98617|c1_g2_i1	Vigun04g159500	Vigun04g159500.1	(1 of 1) PTHR11362//PTHR11362:SF22 - PHOSPHATIDYLETHANOLAMINE-BINDING PROTEIN // PROTEIN BROTHER OF FT AND TFL 1	1533	Vu04	38183549	38185081	PF01161	PTHR11362,PTHR11362:SF22	0	0	0
Vung17219|c0_g2_i1	Vigun03g205800	Vigun03g205800.1	0	7876	Vu03	33334431	33342306	0	PTHR37206,PTHR37206:SF2	0	0	0
Vung89545|c1_g1_i8	Vigun09g102500	Vigun09g102500.1	(1 of 2) PTHR13780//PTHR13780:SF36 - AMP-ACTIVATED PROTEIN KINASE, GAMMA REGULATORY SUBUNIT // SNF1-RELATED PROTEIN KINASE REGULATORY SUBUNIT GAMMA-1	4449	Vu09	17579111	17583559	PF00571	PTHR13780,PTHR13780:SF36	0	0	0
Vung101117|c1_g1_i4	Vigun02g120600	Vigun02g120600.3	(1 of 2) PTHR24072:SF179 - RAC-LIKE GTP-BINDING PROTEIN ARAC1-RELATED	3054	Vu02	27316912	27319965	PF08477	PTHR24072,PTHR24072:SF179	0	K04392	GO:0007264,GO:0005525
Vung7408|c0_g1_i14	Vigun09g032900	Vigun09g032900.1	(1 of 5) PTHR23421//PTHR23421:SF74 - BETA-GALACTOSIDASE RELATED // BETA-GALACTOSIDASE 1	5629	Vu09	2832456	2838084	PF01301	PTHR23421,PTHR23421:SF74	3.2.1.23	0	GO:0005975,GO:0004553
Vung42276|c0_g1_i1	Vigun01g248800	Vigun01g248800.1	0	2262	Vu01	41589847	41592108	0	PTHR34781,PTHR34781:SF2	0	0	0
Vung86988|c1_g1_i1	Vigun08g040400	Vigun08g040400.2	(1 of 2) PTHR13140//PTHR13140:SF304 - MYOSIN // MYOSIN IA HEAVY CHAIN-RELATED	28769	Vu08	3979034	4007802	PF00612,PF01843,PF00063	PTHR13140,PTHR13140:SF304	3.6.4.1	0	GO:0005515,GO:0016459,GO:0005524,GO:0003774
Vung86988|c1_g1_i2	Vigun08g040400	Vigun08g040400.2	(1 of 2) PTHR13140//PTHR13140:SF304 - MYOSIN // MYOSIN IA HEAVY CHAIN-RELATED	28769	Vu08	3979034	4007802	PF00612,PF01843,PF00063	PTHR13140,PTHR13140:SF304	3.6.4.1	0	GO:0005515,GO:0016459,GO:0005524,GO:0003774
Vung10609|c3_g2_i1	Vigun01g233800	Vigun01g233800.2	(1 of 1) PTHR22952//PTHR22952:SF180 - CAMP-RESPONSE ELEMENT BINDING PROTEIN-RELATED // TRANSCRIPTION FACTOR TGA1-RELATED	5048	Vu01	40550994	40556041	PF00170,PF14144	PTHR22952,PTHR22952:SF180	0	K14431	GO:0043565,GO:0006355,GO:0003700,GO:0006351
Vung158272|c4_g2_i2	Vigun02g080700	Vigun02g080700.1	(1 of 1) PTHR33639//PTHR33639:SF1 - FAMILY NOT NAMED // THIOL-DISULFIDE OXIDOREDUCTASE DCC-RELATED	2874	Vu02	23332242	23335115	PF04134	PTHR33639,PTHR33639:SF1	0	0	0
Vung51929|c1_g2_i6	Vigun06g080100	Vigun06g080100.1	(1 of 2) K03178 - ubiquitin-activating enzyme E1 (UBE1, UBA1)	7720	Vu06	21193010	21200729	PF09358,PF16191,PF16190,PF10585,PF00899	PTHR10953,PTHR10953:SF164	0	K03178	GO:0008641
Vung29591|c0_g1_i1	Vigun02g147400	Vigun02g147400.1	(1 of 4) PTHR10641//PTHR10641:SF551 - MYB-LIKE DNA-BINDING PROTEIN MYB // MYB TRANSCRIPTION FACTOR	2589	Vu02	29511116	29513704	PF00249	PTHR10641,PTHR10641:SF551	0	K09422	0
Vung148051|c2_g1_i4	Vigun06g213000	Vigun06g213000.1	(1 of 21) PF00069//PF08263 - Protein kinase domain (Pkinase) // Leucine rich repeat N-terminal domain (LRRNT_2)	2238	Vu06	32496136	32498373	PF08263,PF00069	PTHR27000,PTHR27000:SF29	2.7.11.1	0	GO:0006468,GO:0005524,GO:0004672
[truncated: 173 more rows]

## Sheet: Annotation_CTS-16UR
ID_CTS-16UR	IDGenePhytozome	IDTranscriptPhytozome	GeneDefline	GeneLength	GeneChromosome	GENEstart	GENEend	Pfam	Panther	EC	KO	GO
[truncated: 171 more rows]

[truncated: 1 more sheets: Annotation_CTS-16DR]
