# Supplementary material for: Unlocking Cowpea’s Defense Responses: Conserved Transcriptional Signatures in the Battle against CABMV and CPSMV Viruses
Source: Life (Basel). 2023 Aug 15;13(8):1747. doi: 10.3390/life13081747 (PMC10455494; doi:10.3390/life13081747)
Supplement: Supplementary file 1 [file life-13-01747-s001.zip › ok_Table_S2.xlsx]

## Sheet: Moldule-HormoneSignaling
BinCode	BinName	ID_P.vulgaris	ID_CTS	Description	Log2FC
17.2.1	hormone metabolism.auxin.synthesis-degradation	phvul.010g142600.1	Vung40932|c1_g1_i7	(at1g51760 : 600,0) encodes a member of the six Arabidopsis IAA-amino acid conjugate hydrolase subfamily and conjugates and conjugates IAA-Ala in vitro, Gene is expressed most strongly in roots, stems, and flowers,; IAA-ALANINE RESISTANT 3 (IAR3); FUNCTIONS IN: metallopeptidase activity, IAA-Ala conjugate hydrolase activity; INVOLVED IN: proteolysis, response to wounding; LOCATED IN: endoplasmic …	-3.6658
17.2.1	hormone metabolism.auxin.synthesis-degradation	phvul.009g127200.1	Vung67186|c0_g3_i2	(at1g44350 : 587,0) encodes a protein similar to IAA amino acid conjugate hydrolase,; IAA-leucine resistant (ILR)-like gene 6 (ILL6); FUNCTIONS IN: metallopeptidase activity, IAA-amino acid conjugate hydrolase activity; INVOLVED IN: proteolysis, regulation of systemic acquired resistance, auxin metabolic process; LOCATED IN: endomembrane system; EXPRESSED IN: 22 plant structures; EXPRESSED DURING…	4.59332
17.2.1	hormone metabolism.auxin.synthesis-degradation	phvul.005g161700.1	Vung40932|c1_g1_i22	(at1g51760 : 590,0) encodes a member of the six Arabidopsis IAA-amino acid conjugate hydrolase subfamily and conjugates and conjugates IAA-Ala in vitro, Gene is expressed most strongly in roots, stems, and flowers,; IAA-ALANINE RESISTANT 3 (IAR3); FUNCTIONS IN: metallopeptidase activity, IAA-Ala conjugate hydrolase activity; INVOLVED IN: proteolysis, response to wounding; LOCATED IN: endoplasmic …	1.19759
17.2.2	hormone metabolism.auxin.signal transduction	phvul.009g078400.2	Vung116562|c0_g1_i4	(at2g26170 : 528,0) Encodes a protein with similarity to thromboxane-A synthase, member of the CYP711A cytochrome P450 family, MAX1 is a specific repressor of vegetative axillary buds generated by the axillary meristem, Expressed in vascular traces in the rosette stem and axillary buds throughout plant development, Mutants have increased axillary branches, Along with MAX3,4 thought to mediate con…	-1.81386
17.2.2	hormone metabolism.auxin.signal transduction	phvul.011g034000.1	Vung50296|c6_g3_i1	(q8l883|lax5_medtr : 814,0) Auxin transporter-like protein 5 (AUX1-like protein 5) (MtLAX5) - Medicago truncatula (Barrel medic) & (at2g21050 : 770,0) Encodes LAX2 (LIKE AUXIN RESISTANT), a member of the AUX1 LAX family of auxin influx carriers, Required for the establishment of embryonic root cell organization,; like AUXIN RESISTANT 2 (LAX2); CONTAINS InterPro DOMAIN/s: Amino acid transporter, t…	3.47216
17.2.3	hormone metabolism.auxin.induced-regulated-responsive-activated	phvul.010g111400.3	Vung18157|c2_g1_i1	(q6i581|gh35_orysa : 803,0) Probable indole-3-acetic acid-amido synthetase GH3,5 (EC 6,3,2,-) (Auxin-responsive GH3-like protein 5) (OsGH3-5) - Oryza sativa (Rice) & (at2g46370 : 791,0) Encodes a jasmonate-amido synthetase that is a member of the GH3 family of proteins, JAR1 catalyzes the formation of a biologically active jasmonyl-isoleucine (JA-Ile) conjugate, JA-Ile promotes the interaction be…	2.18486
17.2.3	hormone metabolism.auxin.induced-regulated-responsive-activated	phvul.003g238700.1	Vung57179|c1_g2_i1	(at2g14960 : 909,0) encodes a protein similar to IAA-amido synthases, Lines carrying an insertion in this gene are hypersensitive to auxin,; GH3,1; CONTAINS InterPro DOMAIN/s: GH3 auxin-responsive promoter (InterPro:IPR004993); BEST Arabidopsis thaliana protein match is: Auxin-responsive GH3 family protein (TAIR:AT4G37390,1); Has 1628 Blast hits to 1412 proteins in 230 species: Archae - 1; Bacter…	2.0807
17.2.3	hormone metabolism.auxin.induced-regulated-responsive-activated	phvul.003g128800.1	Vung109336|c9_g4_i2	(at1g19220 : 679,0) Encodes an auxin response factor that contains the conserved VP1-B3 DNA-binding domain at its N-terminus and the Aux/IAA-like domains III and IV present in most ARFs at its C-terminus, The protein interacts with IAA1 (yeast two hybrid) and other auxin response elements such as ER7 and ER9 (yeast one hybrid), ARF19 protein can complement many aspects of the arf7 mutant phenotyp…	3.09501
17.2.3	hormone metabolism.auxin.induced-regulated-responsive-activated	phvul.009g001700.1	Vung115802|c1_g2_i1	(at4g38840 : 120,0) SAUR-like auxin-responsive protein family ; FUNCTIONS IN: molecular_function unknown; INVOLVED IN: response to auxin stimulus, response to cold; LOCATED IN: plasma membrane; EXPRESSED IN: 21 plant structures; EXPRESSED DURING: 13 growth stages; CONTAINS InterPro DOMAIN/s: Auxin responsive SAUR protein (InterPro:IPR003676); BEST Arabidopsis thaliana protein match is: SAUR-like …	2.59446
17.2.3	hormone metabolism.auxin.induced-regulated-responsive-activated	phvul.005g054400.1	Vung28583|c0_g1_i1	(gnl|cdd|35830 : 512,0) no description available & (at1g53700 : 505,0) The WAG1 and its homolog, WAG2 each encodes a protein-serine/threonine kinase that are nearly 70% identical to PsPK3 protein, All three together with CsPK3 belong to PsPK3-type kinases, At the N-terminus, all four possess a serine/threonine-rich domain, They are closely related to Arabidopsis kinases PINOID, wag1/wag2 double m…	2.65473
17.2.3	hormone metabolism.auxin.induced-regulated-responsive-activated	phvul.011g108500.1	Vung43970|c0_g1_i1	(at5g54510 : 949,0) Encodes an IAA-amido synthase that conjugates Ala, Asp, Phe, and Trp to auxin, Lines overexpressing this gene accumulate IAA-ASP and are hypersensitive to several auxins, Identified as a dominant mutation that displays shorter hypocotyls in light grown plants when compared to wild type siblings, Protein is similar to auxin inducible gene from pea (GH3),; DWARF IN LIGHT 1 (DFL1…	1.23737
17.2.3	hormone metabolism.auxin.induced-regulated-responsive-activated	phvul.011g113000.1	Vung48304|c1_g1_i4	(at4g03400 : 798,0) Encodes a GH3-related gene involved in red light-specific hypocotyl elongation, Analysis of sense and antisense transgenic plants suggests that DFL2 is located downstream of red light signal transduction and determines the degree of hypocotyl elongation,; DWARF IN LIGHT 2 (DFL2); INVOLVED IN: response to auxin stimulus, response to light stimulus; LOCATED IN: chloroplast; EXPR…	3.53267
17.2.3	hormone metabolism.auxin.induced-regulated-responsive-activated	phvul.011g214200.1	Vung85478|c2_g1_i4	(at2g44500 : 707,0) O-fucosyltransferase family protein; CONTAINS InterPro DOMAIN/s: GDP-fucose protein O-fucosyltransferase (InterPro:IPR019378); BEST Arabidopsis thaliana protein match is: O-fucosyltransferase family protein (TAIR:AT3G07900,1); Has 35333 Blast hits to 34131 proteins in 2444 species: Archae - 798; Bacteria - 22429; Metazoa - 974; Fungi - 991; Plants - 531; Viruses - 0; Other Euk…	-1.82075
17.2.3	hormone metabolism.auxin.induced-regulated-responsive-activated	phvul.008g017800.1	Vung146491|c0_g1_i8	(at1g60690 : 553,0) NAD(P)-linked oxidoreductase superfamily protein; FUNCTIONS IN: oxidoreductase activity, aldo-keto reductase activity; INVOLVED IN: oxidation reduction; LOCATED IN: plasma membrane, chloroplast envelope; EXPRESSED IN: 22 plant structures; EXPRESSED DURING: 13 growth stages; CONTAINS InterPro DOMAIN/s: Aldo/keto reductase (InterPro:IPR001395); BEST Arabidopsis thaliana protein …	5.40848
17.2.3	hormone metabolism.auxin.induced-regulated-responsive-activated	phvul.008g270000.1	Vung64649|c0_g1_i1	(at3g25290 : 203,0) Auxin-responsive family protein; INVOLVED IN: multicellular organismal development; LOCATED IN: plasma membrane, membrane; EXPRESSED IN: 19 plant structures; EXPRESSED DURING: 9 growth stages; CONTAINS InterPro DOMAIN/s: Cytochrome b561, eukaryote (InterPro:IPR004877), Uncharacterised conserved protein UCP037471 (InterPro:IPR017214), Protein of unknown function DUF568, DOMON-l…	2.3782
17.2.3	hormone metabolism.auxin.induced-regulated-responsive-activated	phvul.008g286600.1	Vung65632|c0_g1_i1	(at2g04850 : 545,0) Auxin-responsive family protein; CONTAINS InterPro DOMAIN/s: Cytochrome b561, eukaryote (InterPro:IPR004877), Uncharacterised conserved protein UCP037471 (InterPro:IPR017214), Protein of unknown function DUF568, DOMON-like (InterPro:IPR007613), DOMON related (InterPro:IPR005018), Cytochrome b561/ferric reductase transmembrane (InterPro:IPR006593); BEST Arabidopsis thaliana pro…	2.62381
17.2.3	hormone metabolism.auxin.induced-regulated-responsive-activated	phvul.008g001500.1	Vung128330|c0_g1_i1	(gnl|cdd|66231 : 89,6) no description available & (at5g50760 : 84,0) SAUR-like auxin-responsive protein family ; CONTAINS InterPro DOMAIN/s: Auxin responsive SAUR protein (InterPro:IPR003676); BEST Arabidopsis thaliana protein match is: SAUR-like auxin-responsive protein family (TAIR:AT3G43120,1); Has 1807 Blast hits to 1807 proteins in 277 species: Archae - 0; Bacteria - 0; Metazoa - 736; Fungi …	1.65925
17.2.3	hormone metabolism.auxin.induced-regulated-responsive-activated	phvul.006g142300.1	Vung102370|c0_g1_i1	(at5g47530 : 331,0) Auxin-responsive family protein; CONTAINS InterPro DOMAIN/s: Cytochrome b561, eukaryote (InterPro:IPR004877), Uncharacterised conserved protein UCP037471 (InterPro:IPR017214), Protein of unknown function DUF568, DOMON-like (InterPro:IPR007613), DOMON related (InterPro:IPR005018), Cytochrome b561/ferric reductase transmembrane (InterPro:IPR006593); BEST Arabidopsis thaliana pro…	1.44912
17.2.3	hormone metabolism.auxin.induced-regulated-responsive-activated	phvul.006g183600.2	Vung81606|c0_g2_i4	(gnl|cdd|69106 : 118,0) no description available & (q05349|12kd_fraan : 103,0) Auxin-repressed 12,5 kDa protein - Fragaria ananassa (Strawberry) & (ipr008406 : 102,74086) Dormancyauxin associated & (at1g28330 : 98,6) dormancy-associated protein (DRM1); dormancy-associated protein-like 1 (DYL1); FUNCTIONS IN: molecular_function unknown; INVOLVED IN: response to fructose stimulus, response to sucro…	-1.25424
17.2.3	hormone metabolism.auxin.induced-regulated-responsive-activated	phvul.002g284700.1	Vung33923|c0_g1_i1	(at5g50760 : 87,8) SAUR-like auxin-responsive protein family ; CONTAINS InterPro DOMAIN/s: Auxin responsive SAUR protein (InterPro:IPR003676); BEST Arabidopsis thaliana protein match is: SAUR-like auxin-responsive protein family (TAIR:AT3G43120,1); Has 1807 Blast hits to 1807 proteins in 277 species: Archae - 0; Bacteria - 0; Metazoa - 736; Fungi - 347; Plants - 385; Viruses - 0; Other Eukaryotes…	2.00659
17.3.1.1.1	hormone metabolism.brassinosteroid.synthesis-degradation.BRs.DET2	phvul.004g094100.1	Vung126470|c3_g1_i4	(at5g16010 : 288,0) 3-oxo-5-alpha-steroid 4-dehydrogenase family protein; FUNCTIONS IN: oxidoreductase activity, acting on the CH-CH group of donors, 3-oxo-5-alpha-steroid 4-dehydrogenase activity; INVOLVED IN: lipid metabolic process; LOCATED IN: chloroplast, chloroplast envelope; EXPRESSED IN: 23 plant structures; EXPRESSED DURING: 15 growth stages; CONTAINS InterPro DOMAIN/s: 3-oxo-5-alpha-ste…	1.28736
17.3.1.1.2	hormone metabolism.brassinosteroid.synthesis-degradation.BRs.DWF4	phvul.002g029700.1	Vung126656|c1_g4_i1	(at3g50660 : 739,0) Encodes a 22&#945; hydroxylase whose reaction is a rate-limiting step in brassinosteroid biosynthetic pathway, The protein is a member of CYP90B gene family, CLM is an epi-allele with small, compressed rosette, reduced internode length, and reduced fertility, appears in selfed ddm mutant plants possibly due to loss of cytosine methylation, Transcripts accumulate in actively gr…	4.45015
17.3.1.1.2	hormone metabolism.brassinosteroid.synthesis-degradation.BRs.DWF4	phvul.002g029700.2	Vung126656|c1_g3_i1	(at3g50660 : 565,0) Encodes a 22&#945; hydroxylase whose reaction is a rate-limiting step in brassinosteroid biosynthetic pathway, The protein is a member of CYP90B gene family, CLM is an epi-allele with small, compressed rosette, reduced internode length, and reduced fertility, appears in selfed ddm mutant plants possibly due to loss of cytosine methylation, Transcripts accumulate in actively gr…	1.98955
17.3.1.1.4	hormone metabolism.brassinosteroid.synthesis-degradation.BRs.BR6OX	phvul.004g041700.1	Vung116217|c0_g1_i1	(q69f95|c85a_phavu : 848,0) Cytochrome P450 85A (EC 1,14,-,-) (C6-oxidase) - Phaseolus vulgaris (Kidney bean) (French bean) & (at3g30180 : 724,0) Encodes a cytochrome p450 enzyme that catalyzes the last reaction in the production of brassinolide, It is capable of converting 6-deoxocastasterone into castasterone, a C-6 oxidation, as well as the further conversion of castasterone into brassinolide …	3.41212
17.3.1.1.99	hormone metabolism.brassinosteroid.synthesis-degradation.BRs.other	phvul.004g041700.1	Vung116217|c0_g1_i1	(q69f95|c85a_phavu : 848,0) Cytochrome P450 85A (EC 1,14,-,-) (C6-oxidase) - Phaseolus vulgaris (Kidney bean) (French bean) & (at3g30180 : 724,0) Encodes a cytochrome p450 enzyme that catalyzes the last reaction in the production of brassinolide, It is capable of converting 6-deoxocastasterone into castasterone, a C-6 oxidation, as well as the further conversion of castasterone into brassinolide …	3.41212
17.3.1.2.2	hormone metabolism.brassinosteroid.synthesis-degradation.sterols.SMT2	phvul.005g023700.1	Vung68533|c0_g1_i4	(at5g13710 : 616,0) SMT1 controls the level of cholesterol in plants; sterol methyltransferase 1 (SMT1); CONTAINS InterPro DOMAIN/s: Sterol methyltransferase C-terminal (InterPro:IPR013705), Methyltransferase type 11 (InterPro:IPR013216); BEST Arabidopsis thaliana protein match is: sterol methyltransferase 3 (TAIR:AT1G76090,1); Has 12253 Blast hits to 12250 proteins in 2286 species: Archae - 352;…	5.49746
17.3.1.2.6	hormone metabolism.brassinosteroid.synthesis-degradation.sterols.DWF7	phvul.004g067300.1	Vung85417|c0_g1_i2	(q9zt29|sc5d_tobac : 401,0) Delta(7)-sterol-C5(6)-desaturase (EC 1,3,3,-) (Delta-7-C-5 sterol desaturase) (Delta(7)-sterol-C5-desaturase) - Nicotiana tabacum (Common tobacco) & (at3g02580 : 385,0) Brassinosteroid biosynthetic enzyme, catalyzes delta7 sterol C-5 desaturation step, Mutant has dwarf phenotype,; sterol 1 (STE1); FUNCTIONS IN: C-5 sterol desaturase activity; INVOLVED IN: sterol biosyn…	1.06649
17.3.1.2.99	hormone metabolism.brassinosteroid.synthesis-degradation.sterols.other	phvul.001g031600.1	Vung77982|c0_g1_i1	(gnl|cdd|36512 : 788,0) no description available & (o48651|erg1_pangi : 786,0) Squalene monooxygenase (EC 1,14,99,7) (Squalene epoxidase) (SE) - Panax ginseng (Korean ginseng) & (at1g58440 : 759,0) Encodes a putative protein that has been speculated, based on sequence similarities, to have squalene monooxygenase activity,; XF1; FUNCTIONS IN: squalene monooxygenase activity; INVOLVED IN: response …	6.11519
17.3.2.1	hormone metabolism.brassinosteroid.signal transduction.BRI	phvul.010g064300.1	Vung158871|c0_g2_i1	(at3g51740 : 476,0) encodes a leucine-repeat receptor kinase expressed in inflorescence meristem, Locus association was made from performing sequence analysis with IMK3 (MRLK) whose locus association was provided by the authors,; inflorescence meristem receptor-like kinase 2 (IMK2); FUNCTIONS IN: protein serine/threonine kinase activity, protein kinase activity, kinase activity, ATP binding; INVO…	1.71615
17.3.2.1	hormone metabolism.brassinosteroid.signal transduction.BRI	phvul.003g187200.1	Vung73863|c0_g2_i1	(at1g74360 : 1232,0) Leucine-rich repeat protein kinase family protein; FUNCTIONS IN: protein serine/threonine kinase activity, protein kinase activity, ATP binding; INVOLVED IN: transmembrane receptor protein tyrosine kinase signaling pathway, protein amino acid phosphorylation; LOCATED IN: mitochondrion; EXPRESSED IN: 15 plant structures; EXPRESSED DURING: 9 growth stages; CONTAINS InterPro DOM…	2.33773
17.3.2.99	hormone metabolism.brassinosteroid.signal transduction.other	phvul.003g181900.1	Vung122912|c0_g1_i17	(at5g08130 : 278,0) Arabidopsis thaliana basic helix-loop-helix (bHLH) family protein involved in brassinosteroid signaling, It synergistically interacts with BES1 to bind to E box sequences (CANNTG),; BIM1; FUNCTIONS IN: protein binding, DNA binding, sequence-specific DNA binding transcription factor activity; INVOLVED IN: brassinosteroid mediated signaling pathway, regulation of transcription; …	5.83674
17.1.1	hormone metabolism.abscisic acid.synthesis-degradation	phvul.008g190500.1	Vung148714|c0_g1_i1	(at2g42820 : 192,0) HVA22-like protein F (HVA22F); FUNCTIONS IN: molecular_function unknown; INVOLVED IN: biological_process unknown; LOCATED IN: endomembrane system; CONTAINS InterPro DOMAIN/s: TB2/DP1/HVA22 related protein (InterPro:IPR004345); BEST Arabidopsis thaliana protein match is: HVA22 homologue A (TAIR:AT1G74520,1); Has 35333 Blast hits to 34131 proteins in 2444 species: Archae - 798; …	2.06213
17.1.1.1.11	hormone metabolism.abscisic acid.synthesis-degradation.synthesis.short chain alcohol dehydrogenmase (ABA2)	phvul.011g097200.1	Vung51542|c1_g1_i6	(at1g52340 : 234,0) Encodes a cytosolic short-chain dehydrogenase/reductase involved in the conversion of xanthoxin to ABA-aldehyde during ABA biosynthesis, Mutants are insensitive to sucrose and glucose,; ABA DEFICIENT 2 (ABA2); CONTAINS InterPro DOMAIN/s: NAD(P)-binding domain (InterPro:IPR016040), Glucose/ribitol dehydrogenase (InterPro:IPR002347), Short-chain dehydrogenase/reductase SDR (Inte…	5.25762
17.1.1.2.1	hormone metabolism.abscisic acid.synthesis-degradation.degradation.8-hydroxylase	phvul.003g278400.1	Vung34621|c1_g1_i8	(at4g19230 : 691,0) Encodes a protein with ABA 8'-hydroxylase activity, involved in ABA catabolism, Member of the CYP707A gene family, CYP707A1 appears to play an important role in determining the ABA levels in dry seeds, Gene involved in postgermination growth, Overexpression of CYP707A1 leads to a decrease in ABA levels and a reduction in after-ripening period to break dormancy,; "cytochrome P4…	1.98091
17.1.1.2.1	hormone metabolism.abscisic acid.synthesis-degradation.degradation.8-hydroxylase	phvul.002g122200.1	Vung34621|c1_g1_i14	(at4g19230 : 739,0) Encodes a protein with ABA 8'-hydroxylase activity, involved in ABA catabolism, Member of the CYP707A gene family, CYP707A1 appears to play an important role in determining the ABA levels in dry seeds, Gene involved in postgermination growth, Overexpression of CYP707A1 leads to a decrease in ABA levels and a reduction in after-ripening period to break dormancy,; "cytochrome P4…	-2.17156
17.1.2	hormone metabolism.abscisic acid.signal transduction	phvul.001g153200.1	Vung120449|c0_g1_i1	(at3g63210 : 140,0) encodes a novel zinc-finger protein with a proline-rich N-terminus, identical to senescence-associated protein SAG102; Protein of unknown function (DUF581); CONTAINS InterPro DOMAIN/s: Protein of unknown function DUF581 (InterPro:IPR007650); BEST Arabidopsis thaliana protein match is: Protein of unknown function (DUF581) (TAIR:AT3G22550,1); Has 30201 Blast hits to 17322 protei…	-1.72882
17.1.2	hormone metabolism.abscisic acid.signal transduction	phvul.006g191700.1	Vung73372|c0_g1_i7	(at4g32010 : 423,0) HSI2-like 1 (HSL1); CONTAINS InterPro DOMAIN/s: Transcriptional factor B3 (InterPro:IPR003340), Zinc finger, CW-type (InterPro:IPR011124); BEST Arabidopsis thaliana protein match is: high-level expression of sugar-inducible gene 2 (TAIR:AT2G30470,1); Has 1397 Blast hits to 1364 proteins in 123 species: Archae - 0; Bacteria - 0; Metazoa - 122; Fungi - 0; Plants - 1204; Viruses …	5.29297
17.1.3	hormone metabolism.abscisic acid.induced-regulated-responsive-activated	phvul.003g013400.1	Vung54304|c0_g1_i2	(at5g23370 : 195,0) GRAM domain-containing protein / ABA-responsive protein-related; CONTAINS InterPro DOMAIN/s: GRAM (InterPro:IPR004182); BEST Arabidopsis thaliana protein match is: GRAM domain-containing protein / ABA-responsive protein-related (TAIR:AT5G23350,1); Has 1807 Blast hits to 1807 proteins in 277 species: Archae - 0; Bacteria - 0; Metazoa - 736; Fungi - 347; Plants - 385; Viruses - …	-2.74952
17.1.3	hormone metabolism.abscisic acid.induced-regulated-responsive-activated	phvul.007g013800.1	Vung56955|c0_g1_i3	(at5g08350 : 190,0) GRAM domain-containing protein / ABA-responsive protein-related; CONTAINS InterPro DOMAIN/s: GRAM (InterPro:IPR004182); BEST Arabidopsis thaliana protein match is: GRAM domain-containing protein / ABA-responsive protein-related (TAIR:AT5G23370,1); Has 358 Blast hits to 358 proteins in 24 species: Archae - 0; Bacteria - 0; Metazoa - 0; Fungi - 0; Plants - 358; Viruses - 0; Othe…	4.17271
17.5.1.1	hormone metabolism.ethylene.synthesis-degradation.1-aminocyclopropane-1-carboxylate synthase	phvul.002g159800.1	Vung142882|c0_g2_i1	(p31531|1a1c_soybn : 667,0) 1-aminocyclopropane-1-carboxylate synthase (EC 4,4,1,14) (ACC synthase) (S-adenosyl-L-methionine methylthioadenosine-lyase) - Glycine max (Soybean) & (gnl|cdd|35477 : 553,0) no description available & (at4g11280 : 536,0) encodes a a member of the 1-aminocyclopropane-1-carboxylate (ACC) synthase (S-adenosyl-L-methionine methylthioadenosine-lyase, EC 4,4,1,14) gene famil…	3.19825
17.5.1.1	hormone metabolism.ethylene.synthesis-degradation.1-aminocyclopropane-1-carboxylate synthase	phvul.002g152200.1	Vung138358|c0_g2_i2	(at1g62960 : 570,0) Encodes an aminotransferase with broad specificity for aspartate and aromatic amino aids such as tyrosine and phenylalanine, It does not act on branched chain amino acids and does not have ACC synthase activity,; ACC synthase 10 (ACS10); CONTAINS InterPro DOMAIN/s: 1-aminocyclopropane-1-carboxylate synthase (InterPro:IPR001176), Aminotransferase, class I/classII (InterPro:IPR0…	-5.88432
17.5.1.1	hormone metabolism.ethylene.synthesis-degradation.1-aminocyclopropane-1-carboxylate synthase	phvul.002g293000.1	Vung104759|c0_g1_i2	(p31531|1a1c_soybn : 946,0) 1-aminocyclopropane-1-carboxylate synthase (EC 4,4,1,14) (ACC synthase) (S-adenosyl-L-methionine methylthioadenosine-lyase) - Glycine max (Soybean) & (at3g61510 : 669,0) Encodes a member of the 1-aminocyclopropane-1-carboxylate (ACC) synthase (S-adenosyl-L-methionine methylthioadenosine-lyase, EC 4,4,1,14) gene family, The gene is transcriptionally active but enzymatic…	1.45111
17.5.1.2	hormone metabolism.ethylene.synthesis-degradation.1-aminocyclopropane-1-carboxylate oxidase	phvul.007g135600.1	Vung20979|c1_g1_i6	(q08507|acco3_pethy : 455,0) 1-aminocyclopropane-1-carboxylate oxidase 3 (EC 1,14,17,4) (ACC oxidase 3) (Ethylene-forming enzyme) (EFE) - Petunia hybrida (Petunia) & (at1g05010 : 422,0) Encodes 1-aminocyclopropane-1-carboxylate oxidase; ethylene-forming enzyme (EFE); FUNCTIONS IN: 1-aminocyclopropane-1-carboxylate oxidase activity; INVOLVED IN: response to fungus, ethylene biosynthetic process; E…	3.87159
17.5.2	hormone metabolism.ethylene.signal transduction	phvul.010g050800.1	Vung29363|c0_g1_i1	(at2g44840 : 120,0) encodes a member of the ERF (ethylene response factor) subfamily B-3 of ERF/AP2 transcription factor family, The protein contains one AP2 domain, There are 18 members in this subfamily including ATERF-1, ATERF-2, AND ATERF-5,; ethylene-responsive element binding factor 13 (ERF13); CONTAINS InterPro DOMAIN/s: DNA-binding, integrase-type (InterPro:IPR016177), Pathogenesis-relate…	3.29835
17.5.2	hormone metabolism.ethylene.signal transduction	phvul.003g235800.1	Vung163157|c0_g1_i1	(at2g23060 : 587,0) Acyl-CoA N-acyltransferases (NAT) superfamily protein; FUNCTIONS IN: N-acetyltransferase activity; INVOLVED IN: metabolic process; LOCATED IN: cellular_component unknown; EXPRESSED IN: embryo, leaf whorl, flower, pedicel, seed; EXPRESSED DURING: 4 anthesis, F mature embryo stage, petal differentiation and expansion stage, E expanded cotyledon stage, D bilateral stage; CONTAINS…	1.86477
17.5.2	hormone metabolism.ethylene.signal transduction	phvul.005g074700.1	Vung46100|c1_g1_i1	(gnl|cdd|47695 : 105,0) no description available & (q9lw49|erf4_nicsy : 91,7) Ethylene-responsive transcription factor 4 (Ethylene-responsive element-binding factor 4 homolog) (EREBP-3) (NsERF3) - Nicotiana sylvestris (Wood tobacco) & (at3g15210 : 89,0) Encodes a member of the ERF (ethylene response factor) subfamily B-1 of ERF/AP2 transcription factor family (ATERF-4), The protein contains one A…	1.40886
17.5.2	hormone metabolism.ethylene.signal transduction	phvul.011g125200.1	Vung37743|c1_g1_i1	(gnl|cdd|47695 : 111,0) no description available & (at5g44210 : 104,0) encodes a member of the ERF (ethylene response factor) subfamily B-1 of ERF/AP2 transcription factor family (ATERF-9), The protein contains one AP2 domain, There are 15 members in this subfamily including ATERF-3, ATERF-4, ATERF-7, and leafy petiole,; erf domain protein 9 (ERF9); FUNCTIONS IN: transcription repressor activity,…	1.9893
17.5.2	hormone metabolism.ethylene.signal transduction	phvul.004g075800.1	Vung51510|c0_g2_i6	(gnl|cdd|66792 : 330,0) no description available & (ipr004158 : 244,76717) Protein of unknown function DUF247, plant & (at4g31980 : 221,0) unknown protein; CONTAINS InterPro DOMAIN/s: Protein of unknown function DUF247, plant (InterPro:IPR004158), Protein of unknown function DUF862, eukaryotic (InterPro:IPR008580); BEST Arabidopsis thaliana protein match is: Plant protein of unknown function (DUF…	-1.77818
17.5.2	hormone metabolism.ethylene.signal transduction	phvul.007g273000.1	Vung4782|c0_g1_i1	(at3g23240 : 161,0) encodes a member of the ERF (ethylene response factor) subfamily B-3 of ERF/AP2 transcription factor family (ERF1), The protein contains one AP2 domain, There are 18 members in this subfamily including ATERF-1, ATERF-2, AND ATERF-5, EREBP like protein that binds GCC box of ethylene regulated promoters such as basic chitinases, Constitutive expression of ERF1 phenocopies ethyle…	-2.31831
17.5.2	hormone metabolism.ethylene.signal transduction	phvul.007g135900.1	Vung158809|c0_g2_i3	(at5g07580 : 113,0) encodes a member of the ERF (ethylene response factor) subfamily B-3 of ERF/AP2 transcription factor family, The protein contains one AP2 domain, There are 18 members in this subfamily including ATERF-1, ATERF-2, AND ATERF-5,; Integrase-type DNA-binding superfamily protein; CONTAINS InterPro DOMAIN/s: DNA-binding, integrase-type (InterPro:IPR016177), Pathogenesis-related trans…	-1.32524
17.5.3	hormone metabolism.ethylene.induced-regulated-responsive-activated	phvul.003g296500.1	Vung130774|c1_g1_i9	(at1g05710 : 166,0) basic helix-loop-helix (bHLH) DNA-binding superfamily protein; FUNCTIONS IN: sequence-specific DNA binding transcription factor activity; INVOLVED IN: response to ethylene stimulus, regulation of transcription; LOCATED IN: nucleus; EXPRESSED IN: 22 plant structures; EXPRESSED DURING: 13 growth stages; CONTAINS InterPro DOMAIN/s: Helix-loop-helix DNA-binding domain (InterPro:IP…	-1.29482
17.5.3	hormone metabolism.ethylene.induced-regulated-responsive-activated	phvul.007g214800.1	Vung38373|c0_g1_i5	(at3g62550 : 174,0) Adenine nucleotide alpha hydrolases-like superfamily protein; FUNCTIONS IN: molecular_function unknown; INVOLVED IN: response to stress; LOCATED IN: vacuole; EXPRESSED IN: 21 plant structures; EXPRESSED DURING: 13 growth stages; CONTAINS InterPro DOMAIN/s: UspA (InterPro:IPR006016), Rossmann-like alpha/beta/alpha sandwich fold (InterPro:IPR014729), Universal stress protein A (…	-1.4401
17.5.3	hormone metabolism.ethylene.induced-regulated-responsive-activated	phvul.007g200700.1	Vung108251|c0_g1_i2	(at3g62550 : 151,0) Adenine nucleotide alpha hydrolases-like superfamily protein; FUNCTIONS IN: molecular_function unknown; INVOLVED IN: response to stress; LOCATED IN: vacuole; EXPRESSED IN: 21 plant structures; EXPRESSED DURING: 13 growth stages; CONTAINS InterPro DOMAIN/s: UspA (InterPro:IPR006016), Rossmann-like alpha/beta/alpha sandwich fold (InterPro:IPR014729), Universal stress protein A (…	-1.18116
17.8.1	hormone metabolism.salicylic acid.synthesis-degradation	phvul.003g255900.1	Vung74207|c2_g2_i3	(gnl|cdd|86349 : 415,0) no description available & (q9fyz9|bamt_antma : 322,0) Benzoate carboxyl methyltransferase (EC 2,1,1,-) (S-adenosyl-L-methionine:benzoic acid carboxyl methyltransferase) - Antirrhinum majus (Garden snapdragon) & (at5g04380 : 305,0) S-adenosyl-L-methionine-dependent methyltransferases superfamily protein; FUNCTIONS IN: methyltransferase activity; INVOLVED IN: response to ca…	1.62233
17.8.1	hormone metabolism.salicylic acid.synthesis-degradation	phvul.003g039900.1	Vung129192|c0_g1_i3	(at4g36470 : 466,0) S-adenosyl-L-methionine-dependent methyltransferases superfamily protein; CONTAINS InterPro DOMAIN/s: SAM dependent carboxyl methyltransferase (InterPro:IPR005299); BEST Arabidopsis thaliana protein match is: S-adenosyl-L-methionine-dependent methyltransferases superfamily protein (TAIR:AT3G11480,1); Has 909 Blast hits to 891 proteins in 125 species: Archae - 0; Bacteria - 69;…	1.02056
17.8.1.1.7	hormone metabolism.salicylic acid.synthesis-degradation.synthesis.methyl-SA methylesterase	phvul.003g255900.1	Vung74207|c2_g2_i3	(gnl|cdd|86349 : 415,0) no description available & (q9fyz9|bamt_antma : 322,0) Benzoate carboxyl methyltransferase (EC 2,1,1,-) (S-adenosyl-L-methionine:benzoic acid carboxyl methyltransferase) - Antirrhinum majus (Garden snapdragon) & (at5g04380 : 305,0) S-adenosyl-L-methionine-dependent methyltransferases superfamily protein; FUNCTIONS IN: methyltransferase activity; INVOLVED IN: response to ca…	1.62233
17.7.1.2	hormone metabolism.jasmonate.synthesis-degradation.lipoxygenase	phvul.011g056500.1	Vung71975|c0_g1_i4	(q8gsm2|lox23_horvu : 962,0) Lipoxygenase 2,3, chloroplast precursor (EC 1,13,11,12) (LOX2:Hv:3) - Hordeum vulgare (Barley) & (at3g45140 : 959,0) Chloroplast lipoxygenase required for wound-induced jasmonic acid accumulation in Arabidopsis,Mutants are resistant to Staphylococcus aureus and accumulate salicylic acid upon infection,; lipoxygenase 2 (LOX2); FUNCTIONS IN: lipoxygenase activity; INVOL…	3.18428
17.7.1.2	hormone metabolism.jasmonate.synthesis-degradation.lipoxygenase	phvul.006g091400.1	Vung71305|c1_g4_i1	(ipr013819 : 1500,0) Lipoxygenase, C-terminal & (p37831|lox1_soltu : 1159,0) Lipoxygenase 1 (EC 1,13,11,12) - Solanum tuberosum (Potato) & (at1g55020 : 1142,0) lipoxygenase, a defense gene conferring resistance Xanthomonas campestris; lipoxygenase 1 (LOX1); CONTAINS InterPro DOMAIN/s: Lipoxygenase, iron binding site (InterPro:IPR020833), Lipoxygenase, C-terminal (InterPro:IPR013819), Lipoxygenase…	4.53633
17.7.1.4	hormone metabolism.jasmonate.synthesis-degradation.allene oxidase cyclase	phvul.003g111500.1	Vung81738|c0_g1_i1	(gnl|cdd|87067 : 319,0) no description available & (ipr009410 : 235,9135) Allene oxide cyclase & (at3g25780 : 228,0) Encodes allene oxide cyclase, one of the enzymes involved in jasmonic acid biosynthesis, One of four genes in Arabidopsis that encode this enzyme, mRNA expression is upregulated in senescing leaves, Note: Nomenclature for Arabidopsis allene oxide cyclase 3 (AOC3, AT3G25780) gene is…	1.32472
17.7.1.4	hormone metabolism.jasmonate.synthesis-degradation.allene oxidase cyclase	phvul.008g020200.1	Vung47861|c0_g1_i1	(gnl|cdd|87067 : 293,0) no description available & (at1g13280 : 226,0) Encodes allene oxide cyclase, One of four genes in Arabidopsis that encode this enzyme, which catalyzes an essential step in jasmonic acid biosynthesis, Gene expression is reduced during senescence, a process that involves jasmonic acid signalling pathway,; allene oxide cyclase 4 (AOC4); FUNCTIONS IN: allene-oxide cyclase acti…	2.2233
17.7.1.4	hormone metabolism.jasmonate.synthesis-degradation.allene oxidase cyclase	phvul.004g072000.1	Vung109148|c1_g1_i3	(gnl|cdd|87067 : 308,0) no description available & (at3g25780 : 246,0) Encodes allene oxide cyclase, one of the enzymes involved in jasmonic acid biosynthesis, One of four genes in Arabidopsis that encode this enzyme, mRNA expression is upregulated in senescing leaves, Note: Nomenclature for Arabidopsis allene oxide cyclase 3 (AOC3, AT3G25780) gene is based on Stenzel et al, 2003 Plant Molecular …	5.5686
17.7.1.5	hormone metabolism.jasmonate.synthesis-degradation.12-Oxo-PDA-reductase	phvul.003g131600.1	Vung79280|c3_g1_i1	(at2g06050 : 590,0) Encodes a 12-oxophytodienoate reductase that is required for jasmonate biosynthesis, Mutants are male sterile and defective in pollen dehiscence, Shows activity towards 2,4,6-trinitrotoluene,; oxophytodienoate-reductase 3 (OPR3); FUNCTIONS IN: 12-oxophytodienoate reductase activity; INVOLVED IN: response to jasmonic acid stimulus, response to fungus, jasmonic acid biosynthetic…	4.69951
17.7.1.5	hormone metabolism.jasmonate.synthesis-degradation.12-Oxo-PDA-reductase	phvul.003g264000.1	Vung130443|c3_g2_i11	(at1g76690 : 616,0) Encodes one of the closely related 12-oxophytodienoic acid reductases, This enzyme is not expected to participate in jasmonic acid biosynthesis because during in vitro assays, it shows very little activity with the naturally occurring OPDA isomer, Shows activity towards 2,4,6-trinitrotoluene, Expressed predominately in root, Predicted to be a cytosolic protein,; 12-oxophytodie…	2.29536
17.7.1.5	hormone metabolism.jasmonate.synthesis-degradation.12-Oxo-PDA-reductase	phvul.003g131500.1	Vung115541|c1_g5_i8	(at2g06050 : 546,0) Encodes a 12-oxophytodienoate reductase that is required for jasmonate biosynthesis, Mutants are male sterile and defective in pollen dehiscence, Shows activity towards 2,4,6-trinitrotoluene,; oxophytodienoate-reductase 3 (OPR3); FUNCTIONS IN: 12-oxophytodienoate reductase activity; INVOLVED IN: response to jasmonic acid stimulus, response to fungus, jasmonic acid biosynthetic…	5.49833
17.7.1.5	hormone metabolism.jasmonate.synthesis-degradation.12-Oxo-PDA-reductase	phvul.011g189300.1	Vung75777|c2_g1_i1	(at1g76680 : 499,0) Encodes a member of an alpha/beta barrel fold family of FMN-containing oxidoreductases, One of the closely related 12-oxophytodienoic acid reductases, This enzyme is not expected to participate in jasmonic acid biosynthesis because during in vitro assays, it shows very little activity with the naturally occurring OPDA isomer, Shows activity towards 2,4,6-trinitrotoluene, Expre…	3.81778
17.7.1.5	hormone metabolism.jasmonate.synthesis-degradation.12-Oxo-PDA-reductase	phvul.011g189200.1	Vung52583|c0_g1_i1	(at1g76690 : 516,0) Encodes one of the closely related 12-oxophytodienoic acid reductases, This enzyme is not expected to participate in jasmonic acid biosynthesis because during in vitro assays, it shows very little activity with the naturally occurring OPDA isomer, Shows activity towards 2,4,6-trinitrotoluene, Expressed predominately in root, Predicted to be a cytosolic protein,; 12-oxophytodie…	3.2682
17.7.1.5	hormone metabolism.jasmonate.synthesis-degradation.12-Oxo-PDA-reductase	phvul.002g043000.1	Vung130443|c3_g2_i5	(at1g76680 : 550,0) Encodes a member of an alpha/beta barrel fold family of FMN-containing oxidoreductases, One of the closely related 12-oxophytodienoic acid reductases, This enzyme is not expected to participate in jasmonic acid biosynthesis because during in vitro assays, it shows very little activity with the naturally occurring OPDA isomer, Shows activity towards 2,4,6-trinitrotoluene, Expre…	2.60771
17.7.1.5	hormone metabolism.jasmonate.synthesis-degradation.12-Oxo-PDA-reductase	phvul.002g042900.1	Vung130443|c3_g2_i15	(at1g76690 : 546,0) Encodes one of the closely related 12-oxophytodienoic acid reductases, This enzyme is not expected to participate in jasmonic acid biosynthesis because during in vitro assays, it shows very little activity with the naturally occurring OPDA isomer, Shows activity towards 2,4,6-trinitrotoluene, Expressed predominately in root, Predicted to be a cytosolic protein,; 12-oxophytodie…	1.31022
17.7.1.10	hormone metabolism.jasmonate.synthesis-degradation.jasmonate-O-methyltransferase	phvul.003g255900.1	Vung74207|c2_g2_i3	(gnl|cdd|86349 : 415,0) no description available & (q9fyz9|bamt_antma : 322,0) Benzoate carboxyl methyltransferase (EC 2,1,1,-) (S-adenosyl-L-methionine:benzoic acid carboxyl methyltransferase) - Antirrhinum majus (Garden snapdragon) & (at5g04380 : 305,0) S-adenosyl-L-methionine-dependent methyltransferases superfamily protein; FUNCTIONS IN: methyltransferase activity; INVOLVED IN: response to ca…	1.62233
17.7.1.10	hormone metabolism.jasmonate.synthesis-degradation.jasmonate-O-methyltransferase	phvul.001g012300.1	Vung44034|c0_g1_i2	(gnl|cdd|86349 : 386,0) no description available & (at1g19640 : 330,0) Encodes a S-adenosyl-L-methionine:jasmonic acid carboxyl methyltransferase that catalyzes the formation of methyljasmonate from jasmonic acid, Its expression is induced in response to wounding or methyljasmonate treatment,; jasmonic acid carboxyl methyltransferase (JMT); CONTAINS InterPro DOMAIN/s: SAM dependent carboxyl methy…	1.45041
17.7.2	hormone metabolism.jasmonate.signal transduction	phvul.003g129200.1	Vung128398|c0_g4_i11	(at1g19180 : 129,0) JAZ1 is a nuclear-localized protein involved in jasmonate signaling, JAZ1 transcript levels rise in response to a jasmonate stimulus, JAZ1 can interact with the COI1 F-box subunit of an SCF E3 ubiquitin ligase in a yeast-two-hybrid assay only in the presence of jasmonate-isoleucine (JA-ILE) or coronatine, Application of jasmonate methyl ester to Arabidopsis roots reduces the l…	2.35771
17.7.2	hormone metabolism.jasmonate.signal transduction	phvul.009g225300.1	Vung153373|c1_g1_i2	(at1g74950 : 125,0) TIFY10B; CONTAINS InterPro DOMAIN/s: Tify (InterPro:IPR010399), CCT domain-like (InterPro:IPR018467); BEST Arabidopsis thaliana protein match is: jasmonate-zim-domain protein 1 (TAIR:AT1G19180,1); Has 432 Blast hits to 427 proteins in 29 species: Archae - 0; Bacteria - 0; Metazoa - 0; Fungi - 0; Plants - 432; Viruses - 0; Other Eukaryotes - 0 (source: NCBI BLink), & (reliabili…	5.49396

## Sheet: Module-TranscriptionFactors
BinCode	BinName	ID_P.vulgaris	ID_CTS	Description	Log2FC
27.3.3	RNA.regulation of transcription.AP2/EREBP. APETALA2/Ethylene-responsive element binding protein family	phvul.010g114900.1	Vung15536|c1_g1_i1	(at1g01250 : 140,0) encodes a member of the DREB subfamily A-4 of ERF/AP2 transcription factor family, The protein contains one AP2 domain, There are 17 members in this subfamily including TINY,; Integrase-type DNA-binding superfamily protein; FUNCTIONS IN: DNA binding, sequence-specific DNA binding transcription factor activity; INVOLVED IN: regulation of transcription, DNA-dependent; LOCATED IN…	2.06729
27.3.3	RNA.regulation of transcription.AP2/EREBP. APETALA2/Ethylene-responsive element binding protein family	phvul.009g093600.1	Vung71813|c0_g1_i1	(at5g11190 : 182,0) encodes a member of the ERF (ethylene response factor) subfamily B-6 of ERF/AP2 transcription factor family, The protein contains one AP2 domain, There are 12 members in this subfamily including RAP2,11,; shine3 (SHN3); FUNCTIONS IN: DNA binding, sequence-specific DNA binding transcription factor activity; INVOLVED IN: regulation of transcription, DNA-dependent; LOCATED IN: mi…	5.87018
27.3.3	RNA.regulation of transcription.AP2/EREBP. APETALA2/Ethylene-responsive element binding protein family	phvul.009g251600.1	Vung87673|c1_g2_i1	(gnl|cdd|47695 : 108,0) no description available & (at3g16770 : 104,0) Encodes a member of the ERF (ethylene response factor) subfamily B-2 of the plant specific ERF/AP2 transcription factor family (RAP2,3), The protein contains one AP2 domain, There are 5 members in this subfamily including RAP2,2 AND RAP2,12,It is localized to the nucleus and acts as a transcriptional activator through the GCC-…	1.86705
27.3.3	RNA.regulation of transcription.AP2/EREBP. APETALA2/Ethylene-responsive element binding protein family	phvul.009g137000.1	Vung7412|c0_g1_i2	(at4g27950 : 142,0) encodes a member of the ERF (ethylene response factor) subfamily B-5 of ERF/AP2 transcription factor family, The protein contains one AP2 domain, There are 7 members in this subfamily,; cytokinin response factor 4 (CRF4); CONTAINS InterPro DOMAIN/s: DNA-binding, integrase-type (InterPro:IPR016177), Pathogenesis-related transcriptional factor/ERF, DNA-binding (InterPro:IPR00147…	2.44352
27.3.3	RNA.regulation of transcription.AP2/EREBP. APETALA2/Ethylene-responsive element binding protein family	phvul.009g137900.1	Vung49034|c0_g1_i1	(gnl|cdd|47695 : 112,0) no description available & (at5g64750 : 82,4) Encodes a putative transcription factor containing an AP2 domain, Is a member of the ERF (ethylene response factor) subfamily B-4 of ERF/AP2 transcription factor family, Expressed in response to ABA, osmotic stress, sugar stress and drought, Mutants are hypersensitive to these stresses, May be involved in regulation of ABA medi…	4.13722
27.3.3	RNA.regulation of transcription.AP2/EREBP. APETALA2/Ethylene-responsive element binding protein family	phvul.005g074700.1	Vung46100|c1_g1_i1	(gnl|cdd|47695 : 105,0) no description available & (q9lw49|erf4_nicsy : 91,7) Ethylene-responsive transcription factor 4 (Ethylene-responsive element-binding factor 4 homolog) (EREBP-3) (NsERF3) - Nicotiana sylvestris (Wood tobacco) & (at3g15210 : 89,0) Encodes a member of the ERF (ethylene response factor) subfamily B-1 of ERF/AP2 transcription factor family (ATERF-4), The protein contains one A…	1.40886
27.3.3	RNA.regulation of transcription.AP2/EREBP. APETALA2/Ethylene-responsive element binding protein family	phvul.008g172200.1	Vung150375|c4_g2_i1	(at1g78080 : 173,0) Encodes a member of the DREB subfamily A-6 of ERF/AP2 transcription factor family (RAP2,4), The protein contains one AP2 domain, Role in mediating light and ethylene signaling,; related to AP2 4 (RAP2,4); CONTAINS InterPro DOMAIN/s: DNA-binding, integrase-type (InterPro:IPR016177), Pathogenesis-related transcriptional factor/ERF, DNA-binding (InterPro:IPR001471); BEST Arabidop…	2.00448
27.3.3	RNA.regulation of transcription.AP2/EREBP. APETALA2/Ethylene-responsive element binding protein family	phvul.008g253600.1	Vung135381|c3_g1_i1	(at1g16060 : 290,0) Encodes ADAP, an AP2-domain protein that interacts with ARIA, ADAP is a positive regulator of the ABA response and is also involved in regulating seedling growth,; ARIA-interacting double AP2 domain protein (ADAP); CONTAINS InterPro DOMAIN/s: DNA-binding, integrase-type (InterPro:IPR016177), Pathogenesis-related transcriptional factor/ERF, DNA-binding (InterPro:IPR001471); BES…	2.68163
27.3.3	RNA.regulation of transcription.AP2/EREBP. APETALA2/Ethylene-responsive element binding protein family	phvul.008g019600.1	Vung158880|c0_g1_i1	(gnl|cdd|47695 : 116,0) no description available & (at5g13330 : 102,0) encodes a member of the ERF (ethylene response factor) subfamily B-4 of ERF/AP2 transcription factor family, The protein contains one AP2 domain, There are 7 members in this subfamily,; related to AP2 6l (Rap2,6L); FUNCTIONS IN: DNA binding, sequence-specific DNA binding transcription factor activity; INVOLVED IN: regulation o…	2.7187
27.3.3	RNA.regulation of transcription.AP2/EREBP. APETALA2/Ethylene-responsive element binding protein family	phvul.008g165000.1	Vung152585|c0_g1_i1	(gnl|cdd|47695 : 106,0) no description available & (at1g21910 : 85,5) encodes a member of the DREB subfamily A-5 of ERF/AP2 transcription factor family, The protein contains one AP2 domain, There are 15 members in this subfamily including RAP2,1, RAP2,9 and RAP2,10,; Integrase-type DNA-binding superfamily protein; FUNCTIONS IN: DNA binding, sequence-specific DNA binding transcription factor activ…	3.64945
27.3.3	RNA.regulation of transcription.AP2/EREBP. APETALA2/Ethylene-responsive element binding protein family	phvul.004g092100.1	Vung64236|c1_g1_i1	(gnl|cdd|47695 : 115,0) no description available & (at5g50080 : 101,0) encodes a member of the ERF (ethylene response factor) subfamily B-4 of ERF/AP2 transcription factor family, The protein contains one AP2 domain, There are 7 members in this subfamily,; ethylene response factor 110 (ERF110); FUNCTIONS IN: DNA binding, sequence-specific DNA binding transcription factor activity; INVOLVED IN: re…	6.00579
27.3.3	RNA.regulation of transcription.AP2/EREBP. APETALA2/Ethylene-responsive element binding protein family	phvul.001g131300.1	Vung39674|c0_g1_i1	(at2g41710 : 416,0) Integrase-type DNA-binding superfamily protein; FUNCTIONS IN: DNA binding, sequence-specific DNA binding transcription factor activity; INVOLVED IN: regulation of transcription, DNA-dependent; LOCATED IN: nucleus; EXPRESSED IN: 22 plant structures; EXPRESSED DURING: 13 growth stages; CONTAINS InterPro DOMAIN/s: DNA-binding, integrase-type (InterPro:IPR016177), Pathogenesis-rel…	-1.84614
27.3.3	RNA.regulation of transcription.AP2/EREBP. APETALA2/Ethylene-responsive element binding protein family	phvul.002g310200.1	Vung146691|c0_g1_i1	(at5g25810 : 160,0) encodes a member of the DREB subfamily A-4 of ERF/AP2 transcription factor family (TINY), The protein contains one AP2 domain, There are 17 members in this subfamily including TINY, Ectopic or overexpression of this gene in a Ds tagged line has reduced cell expansion, The expression of this gene is induced by ethylene and light and appears to stimulate cytokinin biosynthesis,;…	4.06727
27.3.3	RNA.regulation of transcription.AP2/EREBP. APETALA2/Ethylene-responsive element binding protein family	phvul.002g035100.1	Vung21996|c0_g1_i1	(at1g22810 : 121,0) encodes a member of the DREB subfamily A-5 of ERF/AP2 transcription factor family, The protein contains one AP2 domain, There are 16 members in this subfamily including RAP2,1, RAP2,9 and RAP2,10,; Integrase-type DNA-binding superfamily protein; FUNCTIONS IN: DNA binding, sequence-specific DNA binding transcription factor activity; INVOLVED IN: regulation of transcription, DNA…	4.01832
27.3.3	RNA.regulation of transcription.AP2/EREBP. APETALA2/Ethylene-responsive element binding protein family	phvul.002g267800.1	Vung87673|c1_g1_i2	(at5g64750 : 108,0) Encodes a putative transcription factor containing an AP2 domain, Is a member of the ERF (ethylene response factor) subfamily B-4 of ERF/AP2 transcription factor family, Expressed in response to ABA, osmotic stress, sugar stress and drought, Mutants are hypersensitive to these stresses, May be involved in regulation of ABA mediated stress response,; ABA REPRESSOR1 (ABR1); CONT…	3.58677
27.3.35	RNA.regulation of transcription.bZIP transcription factor family	phvul.008g247800.1	Vung106366|c1_g1_i2	(q6s4p4|rf2b_orysa : 239,0) Transcription factor RF2b - Oryza sativa (Rice) & (at1g06850 : 229,0) basic leucine-zipper 52 (bZIP52); FUNCTIONS IN: DNA binding, sequence-specific DNA binding transcription factor activity; INVOLVED IN: regulation of transcription, DNA-dependent; EXPRESSED IN: 23 plant structures; EXPRESSED DURING: 15 growth stages; CONTAINS InterPro DOMAIN/s: Basic-leucine zipper (b…	1.3597
27.3.35	RNA.regulation of transcription.bZIP transcription factor family	phvul.001g249300.1	Vung10609|c3_g2_i1	(at5g65210 : 498,0) Encodes TGA1, a redox-controlled regulator of systemic acquired resistance, TGA1 targets the activation sequence-1 (as-1) element of the promoter region of defense proteins, TGA1 are S-nitrosylated,; TGA1; CONTAINS InterPro DOMAIN/s: Basic-leucine zipper (bZIP) transcription factor (InterPro:IPR004827), bZIP transcription factor, bZIP-1 (InterPro:IPR011616); BEST Arabidopsis t…	-1.07238
27.3.35	RNA.regulation of transcription.bZIP transcription factor family	phvul.006g101700.1	Vung25395|c0_g1_i3	(q99090|cprf2_petcr : 221,0) Light-inducible protein CPRF-2 - Petroselinum crispum (Parsley) (Petroselinum hortense) & (at5g28770 : 184,0) bZIP protein BZO2H3 mRNA, partial cds; BZO2H3; FUNCTIONS IN: DNA binding, protein heterodimerization activity, sequence-specific DNA binding transcription factor activity; INVOLVED IN: regulation of transcription, DNA-dependent; EXPRESSED IN: 22 plant structur…	-2.51146
27.3.35	RNA.regulation of transcription.bZIP transcription factor family	phvul.002g263400.1	Vung10609|c4_g2_i9	(at5g65210 : 439,0) Encodes TGA1, a redox-controlled regulator of systemic acquired resistance, TGA1 targets the activation sequence-1 (as-1) element of the promoter region of defense proteins, TGA1 are S-nitrosylated,; TGA1; CONTAINS InterPro DOMAIN/s: Basic-leucine zipper (bZIP) transcription factor (InterPro:IPR004827), bZIP transcription factor, bZIP-1 (InterPro:IPR011616); BEST Arabidopsis t…	-1.49234
27.3.35	RNA.regulation of transcription.bZIP transcription factor family	phvul.002g275400.1	Vung141550|c0_g1_i1	(at3g14880 : 132,0) FUNCTIONS IN: molecular_function unknown; INVOLVED IN: response to karrikin; BEST Arabidopsis thaliana protein match is: transcription factor-related (TAIR:AT4G18650,1); Has 30201 Blast hits to 17322 proteins in 780 species: Archae - 12; Bacteria - 1396; Metazoa - 17338; Fungi - 3422; Plants - 5037; Viruses - 0; Other Eukaryotes - 2996 (source: NCBI BLink), & (reliability: 264…	2.66778
27.3.32	RNA.regulation of transcription.WRKY domain transcription factor family	phvul.010g161100.1	Vung8932|c0_g1_i10	(at1g80840 : 232,0) Pathogen-induced transcription factor, Binds W-box sequences in vitro, Forms protein complexes with itself and with WRKY40 and WRKY60, Coexpression with WRKY18 or WRKY60 made plants more susceptible to both P, syringae and B, cinerea, WRKY18, WRKY40, and WRKY60 have partially redundant roles in response to the hemibiotrophic bacterial pathogen Pseudomonas syringae and the necr…	4.69539
27.3.32	RNA.regulation of transcription.WRKY domain transcription factor family	phvul.009g138900.1	Vung36392|c1_g1_i1	(at5g64810 : 120,0) member of WRKY Transcription Factor; Group II-c; WRKY DNA-binding protein 51 (WRKY51); CONTAINS InterPro DOMAIN/s: DNA-binding WRKY (InterPro:IPR003657); BEST Arabidopsis thaliana protein match is: WRKY DNA-binding protein 50 (TAIR:AT5G26170,1); Has 30201 Blast hits to 17322 proteins in 780 species: Archae - 12; Bacteria - 1396; Metazoa - 17338; Fungi - 3422; Plants - 5037; Vi…	-2.14638
27.3.32	RNA.regulation of transcription.WRKY domain transcription factor family	phvul.009g137500.1	Vung102341|c0_g2_i1	(at5g24110 : 148,0) member of WRKY Transcription Factor; Group III; WRKY DNA-binding protein 30 (WRKY30); FUNCTIONS IN: sequence-specific DNA binding transcription factor activity; INVOLVED IN: regulation of transcription, DNA-dependent, regulation of transcription; EXPRESSED IN: stem, stamen; EXPRESSED DURING: 4 anthesis; CONTAINS InterPro DOMAIN/s: DNA-binding WRKY (InterPro:IPR003657); BEST Ar…	1.02999
27.3.32	RNA.regulation of transcription.WRKY domain transcription factor family	phvul.008g058300.1	Vung50795|c1_g1_i3	(at4g01250 : 204,0) member of WRKY Transcription Factor; Group II-e; WRKY22; CONTAINS InterPro DOMAIN/s: DNA-binding WRKY (InterPro:IPR003657); BEST Arabidopsis thaliana protein match is: WRKY family transcription factor (TAIR:AT4G23550,1); Has 3274 Blast hits to 2836 proteins in 187 species: Archae - 0; Bacteria - 0; Metazoa - 0; Fungi - 3; Plants - 3256; Viruses - 0; Other Eukaryotes - 15 (sour…	1.16452
27.3.32	RNA.regulation of transcription.WRKY domain transcription factor family	phvul.004g105800.1	Vung63459|c4_g1_i1	(at5g52830 : 164,0) Encodes a WRKY transcription factor WRKY27, Mutation in Arabidopsis WRKY27 results in delayed symptom development in response to the bacterial wilt pathogen Ralstonia solanacearum,; WRKY DNA-binding protein 27 (WRKY27); CONTAINS InterPro DOMAIN/s: DNA-binding WRKY (InterPro:IPR003657); BEST Arabidopsis thaliana protein match is: WRKY family transcription factor (TAIR:AT4G01250…	3.66914
27.3.32	RNA.regulation of transcription.WRKY domain transcription factor family	phvul.001g214400.1	Vung130502|c4_g2_i2	(at2g47260 : 182,0) Encodes a member of WRKY Transcription Factor; Group I, Involved in nematode feeding site establishment,; WRKY DNA-binding protein 23 (WRKY23); CONTAINS InterPro DOMAIN/s: DNA-binding WRKY (InterPro:IPR003657), Transcription factor, WRKY group IIc (InterPro:IPR017396); BEST Arabidopsis thaliana protein match is: WRKY family transcription factor (TAIR:AT3G62340,1); Has 3541 Bla…	1.4465
27.3.32	RNA.regulation of transcription.WRKY domain transcription factor family	phvul.001g042200.1	Vung39842|c0_g1_i5	(at1g80840 : 205,0) Pathogen-induced transcription factor, Binds W-box sequences in vitro, Forms protein complexes with itself and with WRKY40 and WRKY60, Coexpression with WRKY18 or WRKY60 made plants more susceptible to both P, syringae and B, cinerea, WRKY18, WRKY40, and WRKY60 have partially redundant roles in response to the hemibiotrophic bacterial pathogen Pseudomonas syringae and the necr…	1.59287
27.3.32	RNA.regulation of transcription.WRKY domain transcription factor family	phvul.002g293200.1	Vung131891|c0_g1_i1	(at4g23550 : 123,0) Encodes WRKY DNA-binding protein 29 (WRKY29),; WRKY29; CONTAINS InterPro DOMAIN/s: DNA-binding WRKY (InterPro:IPR003657); BEST Arabidopsis thaliana protein match is: WRKY family transcription factor (TAIR:AT4G01250,1); Has 3402 Blast hits to 2953 proteins in 188 species: Archae - 0; Bacteria - 0; Metazoa - 0; Fungi - 0; Plants - 3386; Viruses - 2; Other Eukaryotes - 14 (source…	1.55115
27.3.32	RNA.regulation of transcription.WRKY domain transcription factor family	phvul.002g196800.1	Vung22372|c0_g1_i2	(at4g18170 : 153,0) member of WRKY Transcription Factor; Group II-c; WRKY DNA-binding protein 28 (WRKY28); CONTAINS InterPro DOMAIN/s: DNA-binding WRKY (InterPro:IPR003657), Transcription factor, WRKY group IIc (InterPro:IPR017396); BEST Arabidopsis thaliana protein match is: WRKY DNA-binding protein 8 (TAIR:AT5G46350,1); Has 1807 Blast hits to 1807 proteins in 277 species: Archae - 0; Bacteria -…	4.42787
27.3.25	RNA.regulation of transcription.MYB domain transcription factor family	phvul.009g062700.1	Vung87270|c0_g2_i1	(at3g50060 : 179,0) Encodes a member of the R2R3 transcription factor gene family, Expressed in response to potassium deprivation and auxin, Involved in lateral root development, Interacts with ARF7 and regulates the expression of some auxin responsive genes,; myb domain protein 77 (MYB77); CONTAINS InterPro DOMAIN/s: SANT, DNA-binding (InterPro:IPR001005), Homeodomain-like (InterPro:IPR009057), …	4.64143
27.3.25	RNA.regulation of transcription.MYB domain transcription factor family	phvul.009g187700.1	Vung117187|c0_g1_i1	(at3g47600 : 313,0) Encodes a putative transcription factor (MYB94),; myb domain protein 94 (MYB94); CONTAINS InterPro DOMAIN/s: SANT, DNA-binding (InterPro:IPR001005), Homeodomain-like (InterPro:IPR009057), Myb, DNA-binding (InterPro:IPR014778), HTH transcriptional regulator, Myb-type, DNA-binding (InterPro:IPR017930), Homeodomain-related (InterPro:IPR012287), Myb transcription factor (InterPro:…	2.00323
27.3.25	RNA.regulation of transcription.MYB domain transcription factor family	phvul.009g228200.1	Vung165523|c3_g2_i1	(p10290|mybc_maize : 145,0) Anthocyanin regulatory C1 protein - Zea mays (Maize) & (at3g13540 : 142,0) Encodes a member of the MYB family of transcriptional regulators, MYB5 act as a negative regulator of trichome branching and play a role in the correct formation of the seed coat and possibly the formation the underlying endosperm layers, Loss of function mutations have defects in seed coat muci…	-1.05586
27.3.25	RNA.regulation of transcription.MYB domain transcription factor family	phvul.005g109800.1	Vung54462|c0_g1_i2	(p20024|myb1_maize : 192,0) Myb-related protein Zm1 - Zea mays (Maize) & (at4g21440 : 185,0) Encodes a MYB transcription factor involved in wounding and osmotic stress response, Member of the R2R3 factor gene family,; MYB-like 102 (MYB102); CONTAINS InterPro DOMAIN/s: SANT, DNA-binding (InterPro:IPR001005), Homeodomain-like (InterPro:IPR009057), Myb, DNA-binding (InterPro:IPR014778), HTH transcri…	4.72749
27.3.25	RNA.regulation of transcription.MYB domain transcription factor family	phvul.005g109700.1	Vung14|c0_g1_i3	(q7xbh4|myb4_orysa : 174,0) Myb-related protein Myb4 (OsMyb4) (Transcription factor RLTR1) - Oryza sativa (Rice) & (gnl|cdd|35271 : 172,0) no description available & (at3g01140 : 171,0) Encodes a MIXTA-like MYB gene NOECK (NOK), Loss of function mutations show an increased number of branchpoints in leaf trichomes suggesting a role in negative regulation of trichome branching,; myb domain protein …	4.35281
27.3.25	RNA.regulation of transcription.MYB domain transcription factor family	phvul.011g067000.1	Vung9332|c1_g1_i4	(at3g46130 : 112,0) Encodes a putative transcription factor (MYB48) that functions to regulate flavonol biosynthesis primarily in cotyledons,; myb domain protein 48 (MYB48); CONTAINS InterPro DOMAIN/s: SANT, DNA-binding (InterPro:IPR001005), Myb, DNA-binding (InterPro:IPR014778), Homeodomain-like (InterPro:IPR009057), Myb transcription factor (InterPro:IPR015495), HTH transcriptional regulator, M…	-1.82721
27.3.25	RNA.regulation of transcription.MYB domain transcription factor family	phvul.011g109700.1	Vung45798|c0_g2_i4	(at2g31180 : 175,0) Member of the R2R3 factor gene family,; myb domain protein 14 (MYB14); CONTAINS InterPro DOMAIN/s: SANT, DNA-binding (InterPro:IPR001005), Homeodomain-like (InterPro:IPR009057), Myb, DNA-binding (InterPro:IPR014778), HTH transcriptional regulator, Myb-type, DNA-binding (InterPro:IPR017930), Homeodomain-related (InterPro:IPR012287), Myb transcription factor (InterPro:IPR015495)…	3.82071
27.3.25	RNA.regulation of transcription.MYB domain transcription factor family	phvul.011g109600.1	Vung45798|c0_g3_i4	(p20024|myb1_maize : 174,0) Myb-related protein Zm1 - Zea mays (Maize) & (at2g31180 : 173,0) Member of the R2R3 factor gene family,; myb domain protein 14 (MYB14); CONTAINS InterPro DOMAIN/s: SANT, DNA-binding (InterPro:IPR001005), Homeodomain-like (InterPro:IPR009057), Myb, DNA-binding (InterPro:IPR014778), HTH transcriptional regulator, Myb-type, DNA-binding (InterPro:IPR017930), Homeodomain-re…	5.27531
27.3.25	RNA.regulation of transcription.MYB domain transcription factor family	phvul.008g041500.1	Vung53776|c2_g1_i1	(at5g62470 : 286,0) Encodes a R2R3 type Myb transcription factor whose expression is strongly induced by abscisic acid, Mediates abscisic acid signaling during drought stress response,; myb domain protein 96 (MYB96); CONTAINS InterPro DOMAIN/s: SANT, DNA-binding (InterPro:IPR001005), Homeodomain-like (InterPro:IPR009057), Myb, DNA-binding (InterPro:IPR014778), HTH transcriptional regulator, Myb-t…	1.8959
27.3.25	RNA.regulation of transcription.MYB domain transcription factor family	phvul.004g028500.1	Vung53776|c2_g2_i1	(at3g28910 : 291,0) transcription factor myb homologue; myb domain protein 30 (MYB30); CONTAINS InterPro DOMAIN/s: SANT, DNA-binding (InterPro:IPR001005), Homeodomain-like (InterPro:IPR009057), Myb, DNA-binding (InterPro:IPR014778), HTH transcriptional regulator, Myb-type, DNA-binding (InterPro:IPR017930), Homeodomain-related (InterPro:IPR012287), Myb transcription factor (InterPro:IPR015495); BE…	1.03659
27.3.25	RNA.regulation of transcription.MYB domain transcription factor family	phvul.007g108500.1	Vung65152|c2_g2_i5	(at3g23250 : 244,0) Member of the R2R3 factor gene family,; myb domain protein 15 (MYB15); CONTAINS InterPro DOMAIN/s: SANT, DNA-binding (InterPro:IPR001005), Homeodomain-like (InterPro:IPR009057), Myb, DNA-binding (InterPro:IPR014778), HTH transcriptional regulator, Myb-type, DNA-binding (InterPro:IPR017930), Homeodomain-related (InterPro:IPR012287), Myb transcription factor (InterPro:IPR015495)…	1.90746
27.3.25	RNA.regulation of transcription.MYB domain transcription factor family	phvul.007g154900.1	Vung30562|c6_g1_i7	(at5g41020 : 313,0) myb family transcription factor; FUNCTIONS IN: DNA binding, sequence-specific DNA binding transcription factor activity; CONTAINS InterPro DOMAIN/s: SANT, DNA-binding (InterPro:IPR001005), Homeodomain-like (InterPro:IPR009057), Myb, DNA-binding (InterPro:IPR014778), MYB-like (InterPro:IPR017877), Myb transcription factor (InterPro:IPR015495); Has 1807 Blast hits to 1807 protei…	-5.53382
27.3.25	RNA.regulation of transcription.MYB domain transcription factor family	phvul.002g015100.1	Vung29591|c0_g1_i1	(at5g67300 : 231,0) Member of the R2R3 factor MYB gene family involved in mediating plant responses to a variety of abiotic stimiuli,; myb domain protein r1 (MYBR1); CONTAINS InterPro DOMAIN/s: SANT, DNA-binding (InterPro:IPR001005), Homeodomain-like (InterPro:IPR009057), Myb, DNA-binding (InterPro:IPR014778), HTH transcriptional regulator, Myb-type, DNA-binding (InterPro:IPR017930), Homeodomain-…	-1.29348
27.3.26	RNA.regulation of transcription.MYB-related transcription factor family	phvul.008g226600.1	Vung51571|c1_g1_i6	(at3g11280 : 271,0) Putative transcription factors interacting with the gene product of VHA-B1 (vacuolar ATPase subunit B1; as shown through yeast two-hybrid assay),; Duplicated homeodomain-like superfamily protein; CONTAINS InterPro DOMAIN/s: Molecular chaperone, heat shock protein, Hsp40, DnaJ (InterPro:IPR015609), SANT, eukarya (InterPro:IPR017884), Myb-like DNA-binding domain, SHAQKYF class (…	-1.05441
27.3.8	RNA.regulation of transcription.C2C2(Zn) DOF zinc finger family	phvul.009g186600.1	Vung66857|c2_g1_i2	(at3g47500 : 298,0) Dof-type zinc finger domain-containing protein, identical to H-protein promoter binding factor-2a GI:3386546 from (Arabidopsis thaliana), Interacts with LKP2 and FKF1, but its overexpression does not change flowering time under short or long day conditions,; cycling DOF factor 3 (CDF3); CONTAINS InterPro DOMAIN/s: Zinc finger, Dof-type (InterPro:IPR003851); BEST Arabidopsis th…	-1.22589
27.3.8	RNA.regulation of transcription.C2C2(Zn) DOF zinc finger family	phvul.009g136400.1	Vung101257|c0_g2_i1	(at3g52440 : 139,0) Dof-type zinc finger DNA-binding family protein; CONTAINS InterPro DOMAIN/s: Zinc finger, Dof-type (InterPro:IPR003851); BEST Arabidopsis thaliana protein match is: Dof-type zinc finger DNA-binding family protein (TAIR:AT1G21340,1); Has 1099 Blast hits to 1090 proteins in 57 species: Archae - 0; Bacteria - 0; Metazoa - 2; Fungi - 0; Plants - 1092; Viruses - 0; Other Eukaryotes…	3.90418
27.3.8	RNA.regulation of transcription.C2C2(Zn) DOF zinc finger family	phvul.005g137700.1	Vung59187|c1_g2_i1	(at2g28510 : 121,0) Dof-type zinc finger DNA-binding family protein; FUNCTIONS IN: DNA binding, sequence-specific DNA binding transcription factor activity; INVOLVED IN: regulation of transcription; LOCATED IN: nucleolus; EXPRESSED IN: 22 plant structures; EXPRESSED DURING: 13 growth stages; CONTAINS InterPro DOMAIN/s: Zinc finger, Dof-type (InterPro:IPR003851); BEST Arabidopsis thaliana protein …	2.53803

## Sheet: Mocule-Signaling
BinCode	BinName	ID_P.vulgaris	ID_CTS	Description	Log2FC
30.1	signalling.in sugar and nutrient physiology	phvul.010g006000.1	Vung134383|c1_g1_i2	(gnl|cdd|70010 : 233,0) no description available & (ipr009489 : 187,93651) PAR1 & (at3g54040 : 174,0) PAR1 protein; FUNCTIONS IN: molecular_function unknown; INVOLVED IN: biological_process unknown; LOCATED IN: endomembrane system; EXPRESSED IN: 20 plant structures; EXPRESSED DURING: 10 growth stages; CONTAINS InterPro DOMAIN/s: PAR1 (InterPro:IPR009489); BEST Arabidopsis thaliana protein match i…	1.44559
30.1	signalling.in sugar and nutrient physiology	phvul.009g032100.1	Vung3123|c0_g1_i1	(gnl|cdd|68252 : 411,0) no description available & (at4g08950 : 404,0) EXORDIUM (EXO); FUNCTIONS IN: molecular_function unknown; INVOLVED IN: response to brassinosteroid stimulus; LOCATED IN: cell wall, plant-type cell wall; EXPRESSED IN: 21 plant structures; EXPRESSED DURING: 13 growth stages; CONTAINS InterPro DOMAIN/s: Phosphate-induced protein 1 (InterPro:IPR006766); BEST Arabidopsis thaliana…	-1.43735
30.2.3	signalling.receptor kinases.leucine rich repeat III	phvul.010g064900.1	Vung123016|c0_g1_i1	(at1g67510 : 885,0) Leucine-rich repeat protein kinase family protein; FUNCTIONS IN: protein serine/threonine kinase activity, kinase activity, ATP binding; INVOLVED IN: transmembrane receptor protein tyrosine kinase signaling pathway, protein amino acid phosphorylation; LOCATED IN: endomembrane system; EXPRESSED IN: 22 plant structures; EXPRESSED DURING: 13 growth stages; CONTAINS InterPro DOMAI…	1.97076
30.2.3	signalling.receptor kinases.leucine rich repeat III	phvul.003g029700.1	Vung108509|c0_g1_i2	(at1g68400 : 426,0) leucine-rich repeat transmembrane protein kinase family protein; FUNCTIONS IN: protein serine/threonine kinase activity, kinase activity, ATP binding; INVOLVED IN: transmembrane receptor protein tyrosine kinase signaling pathway, protein amino acid phosphorylation; LOCATED IN: endomembrane system; EXPRESSED IN: 21 plant structures; EXPRESSED DURING: 13 growth stages; CONTAINS …	2.98589
30.2.3	signalling.receptor kinases.leucine rich repeat III	phvul.003g159700.1	Vung59808|c2_g2_i1	(at2g26730 : 496,0) Leucine-rich repeat protein kinase family protein; FUNCTIONS IN: protein serine/threonine kinase activity, protein kinase activity, ATP binding; INVOLVED IN: transmembrane receptor protein tyrosine kinase signaling pathway, protein amino acid phosphorylation; LOCATED IN: plasma membrane; EXPRESSED IN: 24 plant structures; EXPRESSED DURING: 13 growth stages; CONTAINS InterPro D…	2.19302
30.2.3	signalling.receptor kinases.leucine rich repeat III	phvul.009g067200.1	Vung4447|c0_g3_i1	(at5g43020 : 659,0) Leucine-rich repeat protein kinase family protein; FUNCTIONS IN: protein serine/threonine kinase activity, kinase activity, ATP binding; INVOLVED IN: transmembrane receptor protein tyrosine kinase signaling pathway, protein amino acid phosphorylation; LOCATED IN: endomembrane system; EXPRESSED IN: 21 plant structures; EXPRESSED DURING: 13 growth stages; CONTAINS InterPro DOMAI…	1.5455
30.2.3	signalling.receptor kinases.leucine rich repeat III	phvul.008g093000.1	Vung138675|c1_g1_i1	(at1g67510 : 778,0) Leucine-rich repeat protein kinase family protein; FUNCTIONS IN: protein serine/threonine kinase activity, kinase activity, ATP binding; INVOLVED IN: transmembrane receptor protein tyrosine kinase signaling pathway, protein amino acid phosphorylation; LOCATED IN: endomembrane system; EXPRESSED IN: 22 plant structures; EXPRESSED DURING: 13 growth stages; CONTAINS InterPro DOMAI…	2.39067
30.2.3	signalling.receptor kinases.leucine rich repeat III	phvul.007g224300.1	Vung5375|c0_g1_i1	(at2g36570 : 774,0) Leucine-rich repeat protein kinase family protein; FUNCTIONS IN: protein serine/threonine kinase activity, kinase activity, ATP binding; INVOLVED IN: transmembrane receptor protein tyrosine kinase signaling pathway, protein amino acid phosphorylation; LOCATED IN: plasma membrane; EXPRESSED IN: 21 plant structures; EXPRESSED DURING: 13 growth stages; CONTAINS InterPro DOMAIN/s:…	1.9336
30.2.3	signalling.receptor kinases.leucine rich repeat III	phvul.001g185400.1	Vung64579|c0_g1_i1	(at2g36570 : 752,0) Leucine-rich repeat protein kinase family protein; FUNCTIONS IN: protein serine/threonine kinase activity, kinase activity, ATP binding; INVOLVED IN: transmembrane receptor protein tyrosine kinase signaling pathway, protein amino acid phosphorylation; LOCATED IN: plasma membrane; EXPRESSED IN: 21 plant structures; EXPRESSED DURING: 13 growth stages; CONTAINS InterPro DOMAIN/s:…	3.31021
30.2.3	signalling.receptor kinases.leucine rich repeat III	phvul.002g295600.1	Vung98909|c0_g1_i2	(at4g23740 : 693,0) Leucine-rich repeat protein kinase family protein; FUNCTIONS IN: protein serine/threonine kinase activity, kinase activity, ATP binding; INVOLVED IN: transmembrane receptor protein tyrosine kinase signaling pathway, protein amino acid phosphorylation; LOCATED IN: plasma membrane; EXPRESSED IN: 22 plant structures; EXPRESSED DURING: 13 growth stages; CONTAINS InterPro DOMAIN/s:…	2.94112
30.2.4	signalling.receptor kinases.leucine rich repeat IV	phvul.007g112100.1	Vung24812|c0_g1_i1	(at5g51560 : 893,0) Leucine-rich repeat protein kinase family protein; FUNCTIONS IN: protein serine/threonine kinase activity, protein kinase activity, ATP binding; INVOLVED IN: transmembrane receptor protein tyrosine kinase signaling pathway, protein amino acid phosphorylation; LOCATED IN: endomembrane system; EXPRESSED IN: 21 plant structures; EXPRESSED DURING: 14 growth stages; CONTAINS InterP…	2.81894
30.2.5	signalling.receptor kinases.leucine rich repeat V	phvul.006g146100.1	Vung148406|c0_g2_i1	(at4g22130 : 857,0) STRUBBELIG-receptor family 8 (SRF8); FUNCTIONS IN: protein kinase activity, kinase activity, ATP binding; INVOLVED IN: protein amino acid phosphorylation; LOCATED IN: plasma membrane; EXPRESSED IN: 22 plant structures; EXPRESSED DURING: 13 growth stages; CONTAINS InterPro DOMAIN/s: Protein kinase, catalytic domain (InterPro:IPR000719), Leucine-rich repeat (InterPro:IPR001611),…	1.2045
30.2.6	signalling.receptor kinases.leucine rich repeat VI	phvul.001g115100.1	Vung39747|c1_g2_i4	(at3g03770 : 846,0) Leucine-rich repeat protein kinase family protein; FUNCTIONS IN: protein serine/threonine kinase activity, protein kinase activity, ATP binding; INVOLVED IN: transmembrane receptor protein tyrosine kinase signaling pathway, protein amino acid phosphorylation; LOCATED IN: endomembrane system; EXPRESSED IN: 22 plant structures; EXPRESSED DURING: 13 growth stages; CONTAINS InterP…	-2.18938
30.2.7	signalling.receptor kinases.leucine rich repeat VII	phvul.006g174700.1	Vung104358|c1_g1_i2	(at5g45800 : 620,0) maternal effect embryo arrest 62 (MEE62); FUNCTIONS IN: protein serine/threonine kinase activity, protein kinase activity, ATP binding; INVOLVED IN: protein amino acid phosphorylation, transmembrane receptor protein tyrosine kinase signaling pathway, embryo development ending in seed dormancy; EXPRESSED IN: 22 plant structures; EXPRESSED DURING: 13 growth stages; CONTAINS Inte…	3.17845
30.2.8.2	signalling.receptor kinases.leucine rich repeat VIII.VIII-2	phvul.005g078800.1	Vung137335|c3_g2_i8	(at3g14840 : 482,0) Leucine-rich repeat transmembrane protein kinase; FUNCTIONS IN: protein serine/threonine kinase activity, protein kinase activity, ATP binding; INVOLVED IN: protein amino acid phosphorylation; LOCATED IN: plasma membrane; EXPRESSED IN: 25 plant structures; EXPRESSED DURING: 14 growth stages; CONTAINS InterPro DOMAIN/s: Malectin/receptor-like protein kinase (InterPro:IPR021720)…	-1.31972
30.2.8.2	signalling.receptor kinases.leucine rich repeat VIII.VIII-2	phvul.001g176800.1	Vung100749|c1_g2_i3	(at1g16670 : 336,0) Protein kinase superfamily protein; FUNCTIONS IN: protein serine/threonine kinase activity, protein kinase activity, kinase activity, ATP binding; INVOLVED IN: protein amino acid phosphorylation; LOCATED IN: cellular_component unknown; EXPRESSED IN: 23 plant structures; EXPRESSED DURING: 13 growth stages; CONTAINS InterPro DOMAIN/s: Protein kinase, ATP binding site (InterPro:I…	3.99305
30.2.8.2	signalling.receptor kinases.leucine rich repeat VIII.VIII-2	phvul.006g187700.1	Vung116133|c3_g1_i1	(at3g09010 : 382,0) Protein kinase superfamily protein; FUNCTIONS IN: protein serine/threonine kinase activity, protein kinase activity, kinase activity, ATP binding; INVOLVED IN: protein amino acid phosphorylation; LOCATED IN: cellular_component unknown; EXPRESSED IN: 20 plant structures; EXPRESSED DURING: 12 growth stages; CONTAINS InterPro DOMAIN/s: Protein kinase, ATP binding site (InterPro:I…	2.94783
30.2.9	signalling.receptor kinases.leucine rich repeat IX	phvul.005g120300.1	Vung120448|c0_g1_i1	(at2g01820 : 729,0) Leucine-rich repeat protein kinase family protein; FUNCTIONS IN: protein serine/threonine kinase activity, protein kinase activity, ATP binding; INVOLVED IN: pollen development; LOCATED IN: plasma membrane, plant-type cell wall; EXPRESSED IN: 23 plant structures; EXPRESSED DURING: 13 growth stages; CONTAINS InterPro DOMAIN/s: Protein kinase, ATP binding site (InterPro:IPR01744…	1.79428
30.2.9	signalling.receptor kinases.leucine rich repeat IX	phvul.007g268200.1	Vung20942|c0_g2_i1	(at2g01820 : 706,0) Leucine-rich repeat protein kinase family protein; FUNCTIONS IN: protein serine/threonine kinase activity, protein kinase activity, ATP binding; INVOLVED IN: pollen development; LOCATED IN: plasma membrane, plant-type cell wall; EXPRESSED IN: 23 plant structures; EXPRESSED DURING: 13 growth stages; CONTAINS InterPro DOMAIN/s: Protein kinase, ATP binding site (InterPro:IPR01744…	2.40844
30.2.10	signalling.receptor kinases.leucine rich repeat X	phvul.006g197000.1	Vung148051|c2_g1_i1	(at5g48380 : 316,0) Encodes a BAK1-interacting receptor-like kinase named BIR1, Negatively regulates multiple plant resistance signaling pathways, one of which is the SOBIR1(AT2G31880)-dependent pathway,; BAK1-interacting receptor-like kinase 1 (BIR1); FUNCTIONS IN: protein kinase activity; INVOLVED IN: negative regulation of defense response; LOCATED IN: plasma membrane; EXPRESSED IN: 23 plant s…	-2.05273
30.2.11	signalling.receptor kinases.leucine rich repeat XI	phvul.005g036600.1	Vung129837|c0_g1_i2	(at3g20820 : 435,0) Leucine-rich repeat (LRR) family protein; INVOLVED IN: signal transduction, defense response; LOCATED IN: apoplast, cell wall, chloroplast, membrane; EXPRESSED IN: 23 plant structures; EXPRESSED DURING: 13 growth stages; CONTAINS InterPro DOMAIN/s: Leucine-rich repeat-containing N-terminal domain, type 2 (InterPro:IPR013210), Leucine-rich repeat (InterPro:IPR001611); BEST Arab…	2.9094
30.2.11	signalling.receptor kinases.leucine rich repeat XI	phvul.011g212100.1	Vung47237|c0_g1_i1	(at3g20820 : 432,0) Leucine-rich repeat (LRR) family protein; INVOLVED IN: signal transduction, defense response; LOCATED IN: apoplast, cell wall, chloroplast, membrane; EXPRESSED IN: 23 plant structures; EXPRESSED DURING: 13 growth stages; CONTAINS InterPro DOMAIN/s: Leucine-rich repeat-containing N-terminal domain, type 2 (InterPro:IPR013210), Leucine-rich repeat (InterPro:IPR001611); BEST Arab…	3.60624
30.2.11	signalling.receptor kinases.leucine rich repeat XI	phvul.006g198200.1	Vung146575|c0_g1_i3	(at1g09970 : 943,0) RLK7 belongs to a leucine-rich repeat class of receptor-likekinase (LRR-RLKs), It is involved in the control of germination speed and the tolerance to oxidant stress,; LRR XI-23; FUNCTIONS IN: protein serine/threonine kinase activity, protein kinase activity, kinase activity, ATP binding; INVOLVED IN: protein amino acid phosphorylation, transmembrane receptor protein tyrosine …	6.48098
30.2.12	signalling.receptor kinases.leucine rich repeat XII	phvul.011g007800.1	Vung28059|c0_g1_i1	(at4g08850 : 572,0) Leucine-rich repeat receptor-like protein kinase family protein; FUNCTIONS IN: kinase activity; INVOLVED IN: protein amino acid phosphorylation; LOCATED IN: plasma membrane, membrane; EXPRESSED IN: 23 plant structures; EXPRESSED DURING: 13 growth stages; CONTAINS InterPro DOMAIN/s: Protein kinase, ATP binding site (InterPro:IPR017441), Protein kinase, catalytic domain (InterPr…	2.35397
30.2.12	signalling.receptor kinases.leucine rich repeat XII	phvul.002g196200.1	Vung159976|c0_g1_i7	(at5g46330 : 1072,0) Encodes a leucine-rich repeat serine/threonine protein kinase that is expressed ubiquitously, FLS2 is involved in MAP kinase signalling relay involved in innate immunity, Essential in the perception of flagellin, a potent elicitor of the defense response, FLS2 is directed for degradation by the bacterial ubiquitin ligase AvrPtoB,; FLAGELLIN-SENSITIVE 2 (FLS2); FUNCTIONS IN: p…	3.23365
30.2.13	signalling.receptor kinases.leucine rich repeat XIII	phvul.004g126100.1	Vung79696|c0_g2_i2	(at5g62230 : 1372,0) Encodes a receptor-like kinase that, together with ER and ERL2 governs the initial decision of protodermal cells to either divide proliferatively to produce pavement cells or divide asymmetrically to generate stomatal complexes, It is important for maintaining stomatal stem cell activity and preventing terminal differentiation of the meristemoid into the guard mother cell, Al…	3.6002
30.2.15	signalling.receptor kinases.thaumatin like	phvul.009g239700.1	Vung94119|c2_g1_i3	(gnl|cdd|36401 : 300,0) no description available & (at5g24080 : 259,0) Protein kinase superfamily protein; FUNCTIONS IN: protein serine/threonine kinase activity, protein kinase activity, kinase activity, ATP binding; INVOLVED IN: protein amino acid phosphorylation; LOCATED IN: cellular_component unknown; EXPRESSED IN: sperm cell, stamen; EXPRESSED DURING: 4 anthesis; CONTAINS InterPro DOMAIN/s: …	1.20492
30.2.16	signalling.receptor kinases.Catharanthus roseus-like RLK1	phvul.009g239700.1	Vung94119|c2_g1_i3	(gnl|cdd|36401 : 300,0) no description available & (at5g24080 : 259,0) Protein kinase superfamily protein; FUNCTIONS IN: protein serine/threonine kinase activity, protein kinase activity, kinase activity, ATP binding; INVOLVED IN: protein amino acid phosphorylation; LOCATED IN: cellular_component unknown; EXPRESSED IN: sperm cell, stamen; EXPRESSED DURING: 4 anthesis; CONTAINS InterPro DOMAIN/s: …	1.20492
30.2.16	signalling.receptor kinases.Catharanthus roseus-like RLK1	phvul.008g027200.1	Vung67103|c2_g2_i4	(gnl|cdd|36401 : 248,0) no description available & (at3g51550 : 208,0) Encodes a synergid-expressed, plasma-membrane localized receptor-like kinase that accumulates asymetrically in the synergid membrnane at the filiform apparatus and mediates male-female gametophyte interactions during pollen tube reception,; FERONIA (FER); FUNCTIONS IN: protein kinase activity, kinase activity; INVOLVED IN: pol…	-1.09272
30.2.17	signalling.receptor kinases.DUF 26	phvul.005g014900.1	Vung18446|c1_g1_i3	(at4g23180 : 508,0) Encodes a receptor-like protein kinase, Naming convention from Chen et al 2003 (PMID 14756307); cysteine-rich RLK (RECEPTOR-like protein kinase) 10 (CRK10); FUNCTIONS IN: protein serine/threonine kinase activity, protein kinase activity, kinase activity, ATP binding; INVOLVED IN: protein amino acid phosphorylation; LOCATED IN: plasma membrane; EXPRESSED IN: 22 plant structures…	4.70453
30.2.17	signalling.receptor kinases.DUF 26	phvul.008g156400.1	Vung4040|c1_g3_i1	(at5g40380 : 666,0) Encodes a cysteine-rich receptor-like protein kinase,; cysteine-rich RLK (RECEPTOR-like protein kinase) 42 (CRK42); FUNCTIONS IN: kinase activity; INVOLVED IN: protein amino acid phosphorylation; LOCATED IN: endomembrane system; EXPRESSED IN: 11 plant structures; EXPRESSED DURING: 7 growth stages; CONTAINS InterPro DOMAIN/s: Protein kinase, ATP binding site (InterPro:IPR017441…	4.85288
30.2.17	signalling.receptor kinases.DUF 26	phvul.007g050600.1	Vung156049|c1_g2_i5	(at4g23180 : 586,0) Encodes a receptor-like protein kinase, Naming convention from Chen et al 2003 (PMID 14756307); cysteine-rich RLK (RECEPTOR-like protein kinase) 10 (CRK10); FUNCTIONS IN: protein serine/threonine kinase activity, protein kinase activity, kinase activity, ATP binding; INVOLVED IN: protein amino acid phosphorylation; LOCATED IN: plasma membrane; EXPRESSED IN: 22 plant structures…	-2.743
30.2.17	signalling.receptor kinases.DUF 26	phvul.007g049500.1	Vung80774|c3_g1_i2	(at4g21410 : 575,0) Encodes a cysteine-rich receptor-like protein kinase,; cysteine-rich RLK (RECEPTOR-like protein kinase) 29 (CRK29); FUNCTIONS IN: kinase activity; INVOLVED IN: response to abscisic acid stimulus; LOCATED IN: plasma membrane, vacuole; EXPRESSED IN: 21 plant structures; EXPRESSED DURING: 13 growth stages; CONTAINS InterPro DOMAIN/s: Protein kinase, ATP binding site (InterPro:IPR…	1.43398
30.2.17	signalling.receptor kinases.DUF 26	phvul.002g063700.1	Vung144218|c2_g1_i4	(at1g70520 : 810,0) Encodes a cysteine-rich receptor-like protein kinase,; cysteine-rich RLK (RECEPTOR-like protein kinase) 2 (CRK2); FUNCTIONS IN: kinase activity; INVOLVED IN: response to ozone; LOCATED IN: plasma membrane; EXPRESSED IN: 23 plant structures; EXPRESSED DURING: 13 growth stages; CONTAINS InterPro DOMAIN/s: Protein kinase, ATP binding site (InterPro:IPR017441), Protein kinase, cat…	-1.15923
30.2.19	signalling.receptor kinases.legume-lectin	phvul.008g117800.1	Vung48478|c0_g1_i1	(at2g37710 : 738,0) Induced in response to Salicylic acid,; receptor lectin kinase (RLK); FUNCTIONS IN: kinase activity; INVOLVED IN: response to salicylic acid stimulus; LOCATED IN: plasma membrane; EXPRESSED IN: 23 plant structures; EXPRESSED DURING: 13 growth stages; CONTAINS InterPro DOMAIN/s: Legume lectin, beta chain (InterPro:IPR001220), Protein kinase, ATP binding site (InterPro:IPR017441…	1.26119
30.2.19	signalling.receptor kinases.legume-lectin	phvul.008g139200.1	Vung96323|c0_g3_i3	(at2g32800 : 909,0) AP4,3A; FUNCTIONS IN: protein serine/threonine kinase activity, protein kinase activity, ATP binding; INVOLVED IN: protein amino acid phosphorylation; LOCATED IN: plasma membrane; EXPRESSED IN: 19 plant structures; EXPRESSED DURING: 10 growth stages; CONTAINS InterPro DOMAIN/s: Protein kinase, ATP binding site (InterPro:IPR017441), Serine/threonine-protein kinase domain (Inter…	-3.49953
30.2.19	signalling.receptor kinases.legume-lectin	phvul.001g234200.1	Vung107929|c0_g1_i1	(at3g55550 : 728,0) Concanavalin A-like lectin protein kinase family protein; FUNCTIONS IN: kinase activity; INVOLVED IN: protein amino acid phosphorylation; LOCATED IN: plasma membrane; CONTAINS InterPro DOMAIN/s: Legume lectin, beta chain (InterPro:IPR001220), Protein kinase, ATP binding site (InterPro:IPR017441), Serine/threonine-protein kinase-like domain (InterPro:IPR017442), Concanavalin A-…	2.29182
30.2.19	signalling.receptor kinases.legume-lectin	phvul.006g087700.1	Vung168171|c0_g1_i2	(at5g55830 : 561,0) Concanavalin A-like lectin protein kinase family protein; FUNCTIONS IN: kinase activity; INVOLVED IN: protein amino acid phosphorylation; LOCATED IN: endomembrane system; EXPRESSED IN: 15 plant structures; EXPRESSED DURING: 6 growth stages; CONTAINS InterPro DOMAIN/s: Legume lectin, beta chain (InterPro:IPR001220), Protein kinase, ATP binding site (InterPro:IPR017441), Serine/…	1.73711
30.2.24	signalling.receptor kinases.S-locus glycoprotein like	phvul.009g239700.1	Vung94119|c2_g1_i3	(gnl|cdd|36401 : 300,0) no description available & (at5g24080 : 259,0) Protein kinase superfamily protein; FUNCTIONS IN: protein serine/threonine kinase activity, protein kinase activity, kinase activity, ATP binding; INVOLVED IN: protein amino acid phosphorylation; LOCATED IN: cellular_component unknown; EXPRESSED IN: sperm cell, stamen; EXPRESSED DURING: 4 anthesis; CONTAINS InterPro DOMAIN/s: …	1.20492
30.2.24	signalling.receptor kinases.S-locus glycoprotein like	phvul.005g088200.1	Vung33074|c3_g1_i3	(at4g27290 : 791,0) S-locus lectin protein kinase family protein; FUNCTIONS IN: sugar binding, protein serine/threonine kinase activity, protein kinase activity, ATP binding; INVOLVED IN: protein amino acid phosphorylation, recognition of pollen; LOCATED IN: endomembrane system; CONTAINS InterPro DOMAIN/s: Curculin-like (mannose-binding) lectin (InterPro:IPR001480), Apple-like (InterPro:IPR003609…	1.55453
30.2.24	signalling.receptor kinases.S-locus glycoprotein like	phvul.006g194600.1	Vung93109|c4_g3_i5	(at4g21380 : 895,0) encodes a putative receptor-like serine/threonine protein kinases that is similar to Brassica self-incompatibility (S) locus, Expressed in root, Shoot expression limited to limited to the root-hypocotyl transition zone and at the base of lateral roots as well as in axillary buds, and pedicels,; receptor kinase 3 (RK3); FUNCTIONS IN: transmembrane receptor protein serine/threon…	5.43806
30.2.24	signalling.receptor kinases.S-locus glycoprotein like	phvul.006g194500.1	Vung164066|c4_g2_i1	(at4g21390 : 904,0) B120; FUNCTIONS IN: protein serine/threonine kinase activity, sugar binding, protein kinase activity, ATP binding; INVOLVED IN: protein amino acid phosphorylation, recognition of pollen; LOCATED IN: plasma membrane; EXPRESSED IN: 13 plant structures; EXPRESSED DURING: 8 growth stages; CONTAINS InterPro DOMAIN/s: Curculin-like (mannose-binding) lectin (InterPro:IPR001480), PAN-…	2.05922
30.2.26	signalling.receptor kinases.crinkly like	phvul.008g223900.1	Vung143213|c0_g1_i1	(at3g55950 : 739,0) CRINKLY4 related 3 (CCR3); FUNCTIONS IN: kinase activity; INVOLVED IN: protein amino acid phosphorylation; LOCATED IN: endomembrane system; EXPRESSED IN: 23 plant structures; EXPRESSED DURING: 10 growth stages; CONTAINS InterPro DOMAIN/s: Protein kinase, ATP binding site (InterPro:IPR017441), Regulator of chromosome condensation/beta-lactamase-inhibitor protein II (InterPro:IP…	2.07124
30.2.26	signalling.receptor kinases.crinkly like	phvul.001g243800.1	Vung23234|c2_g1_i3	(at3g55950 : 803,0) CRINKLY4 related 3 (CCR3); FUNCTIONS IN: kinase activity; INVOLVED IN: protein amino acid phosphorylation; LOCATED IN: endomembrane system; EXPRESSED IN: 23 plant structures; EXPRESSED DURING: 10 growth stages; CONTAINS InterPro DOMAIN/s: Protein kinase, ATP binding site (InterPro:IPR017441), Regulator of chromosome condensation/beta-lactamase-inhibitor protein II (InterPro:IP…	1.86759
30.2.99	signalling.receptor kinases.misc	phvul.005g109800.1	Vung54462|c0_g1_i2	(p20024|myb1_maize : 192,0) Myb-related protein Zm1 - Zea mays (Maize) & (at4g21440 : 185,0) Encodes a MYB transcription factor involved in wounding and osmotic stress response, Member of the R2R3 factor gene family,; MYB-like 102 (MYB102); CONTAINS InterPro DOMAIN/s: SANT, DNA-binding (InterPro:IPR001005), Homeodomain-like (InterPro:IPR009057), Myb, DNA-binding (InterPro:IPR014778), HTH transcri…	4.72749
30.2.99	signalling.receptor kinases.misc	phvul.005g109700.1	Vung14|c0_g1_i3	(q7xbh4|myb4_orysa : 174,0) Myb-related protein Myb4 (OsMyb4) (Transcription factor RLTR1) - Oryza sativa (Rice) & (gnl|cdd|35271 : 172,0) no description available & (at3g01140 : 171,0) Encodes a MIXTA-like MYB gene NOECK (NOK), Loss of function mutations show an increased number of branchpoints in leaf trichomes suggesting a role in negative regulation of trichome branching,; myb domain protein …	4.35281
30.2.99	signalling.receptor kinases.misc	phvul.011g109700.1	Vung45798|c0_g2_i4	(at2g31180 : 175,0) Member of the R2R3 factor gene family,; myb domain protein 14 (MYB14); CONTAINS InterPro DOMAIN/s: SANT, DNA-binding (InterPro:IPR001005), Homeodomain-like (InterPro:IPR009057), Myb, DNA-binding (InterPro:IPR014778), HTH transcriptional regulator, Myb-type, DNA-binding (InterPro:IPR017930), Homeodomain-related (InterPro:IPR012287), Myb transcription factor (InterPro:IPR015495)…	3.82071
30.2.99	signalling.receptor kinases.misc	phvul.011g109600.1	Vung45798|c0_g3_i4	(p20024|myb1_maize : 174,0) Myb-related protein Zm1 - Zea mays (Maize) & (at2g31180 : 173,0) Member of the R2R3 factor gene family,; myb domain protein 14 (MYB14); CONTAINS InterPro DOMAIN/s: SANT, DNA-binding (InterPro:IPR001005), Homeodomain-like (InterPro:IPR009057), Myb, DNA-binding (InterPro:IPR014778), HTH transcriptional regulator, Myb-type, DNA-binding (InterPro:IPR017930), Homeodomain-re…	5.27531
30.2.99	signalling.receptor kinases.misc	phvul.008g117800.1	Vung48478|c0_g1_i1	(at2g37710 : 738,0) Induced in response to Salicylic acid,; receptor lectin kinase (RLK); FUNCTIONS IN: kinase activity; INVOLVED IN: response to salicylic acid stimulus; LOCATED IN: plasma membrane; EXPRESSED IN: 23 plant structures; EXPRESSED DURING: 13 growth stages; CONTAINS InterPro DOMAIN/s: Legume lectin, beta chain (InterPro:IPR001220), Protein kinase, ATP binding site (InterPro:IPR017441…	1.26119
30.2.99	signalling.receptor kinases.misc	phvul.002g054000.1	Vung153306|c0_g1_i1	(at1g49750 : 344,0) Leucine-rich repeat (LRR) family protein; LOCATED IN: chloroplast; EXPRESSED IN: 22 plant structures; EXPRESSED DURING: 13 growth stages; CONTAINS InterPro DOMAIN/s: Leucine-rich repeat (InterPro:IPR001611); BEST Arabidopsis thaliana protein match is: Leucine-rich repeat (LRR) family protein (TAIR:AT3G19320,1); Has 196117 Blast hits to 67164 proteins in 2660 species: Archae - …	1.96899
30.3	signalling.calcium	phvul.010g144700.1	Vung116244|c2_g5_i6	(at3g16490 : 258,0) IQ-domain 26 (IQD26); CONTAINS InterPro DOMAIN/s: IQ calmodulin-binding region (InterPro:IPR000048); BEST Arabidopsis thaliana protein match is: IQ-domain 27 (TAIR:AT1G51960,1); Has 778 Blast hits to 763 proteins in 39 species: Archae - 0; Bacteria - 0; Metazoa - 5; Fungi - 10; Plants - 755; Viruses - 0; Other Eukaryotes - 8 (source: NCBI BLink), & (reliability: 516,0) & (orig…	2.29677
30.3	signalling.calcium	phvul.003g210000.1	Vung58002|c0_g2_i1	(at1g76650 : 96,7) calmodulin-like 38 (CML38); CONTAINS InterPro DOMAIN/s: EF-Hand 1, calcium-binding site (InterPro:IPR018247), EF-HAND 2 (InterPro:IPR018249), EF-hand-like domain (InterPro:IPR011992), Calcium-binding EF-hand (InterPro:IPR002048); BEST Arabidopsis thaliana protein match is: Calcium-binding EF-hand family protein (TAIR:AT1G76640,1), & (gnl|cdd|35250 : 90,1) no description availab…	1.79144
30.3	signalling.calcium	phvul.003g194100.1	Vung100357|c0_g2_i6	(at1g18890 : 875,0) encodes a calcium-dependent protein kinase whose gene expression is induced by dehydration and high salt, Kinase activity could not be detected in vitro,; calcium-dependent protein kinase 1 (CDPK1); FUNCTIONS IN: calmodulin-dependent protein kinase activity, protein kinase activity, kinase activity; INVOLVED IN: response to water deprivation, response to salt stress, protein a…	3.5331
30.3	signalling.calcium	phvul.003g294400.1	Vung109385|c0_g1_i1	(at2g15760 : 135,0) Protein of unknown function (DUF1645); FUNCTIONS IN: calmodulin binding; INVOLVED IN: biological_process unknown; LOCATED IN: plasma membrane; EXPRESSED IN: 19 plant structures; EXPRESSED DURING: 10 growth stages; CONTAINS InterPro DOMAIN/s: Protein of unknown function DUF1645 (InterPro:IPR012442); BEST Arabidopsis thaliana protein match is: Protein of unknown function (DUF164…	1.48579
30.3	signalling.calcium	phvul.009g052200.2	Vung164969|c0_g1_i1	(at3g49260 : 182,0) IQ-domain 21 (iqd21); FUNCTIONS IN: calmodulin binding; INVOLVED IN: biological_process unknown; LOCATED IN: cellular_component unknown; EXPRESSED IN: 19 plant structures; EXPRESSED DURING: 13 growth stages; CONTAINS InterPro DOMAIN/s: IQ calmodulin-binding region (InterPro:IPR000048); BEST Arabidopsis thaliana protein match is: IQ-domain 2 (TAIR:AT5G03040,3), & (reliability: …	1.58187
30.3	signalling.calcium	phvul.005g087900.1	Vung83426|c0_g1_i1	(at5g54490 : 89,0) Encodes a PINOID (PID)-binding protein containing putative EF-hand calcium-binding motifs, The interaction is dependent on the presence of calcium, mRNA expression is up-regulated by auxin, Not a phosphorylation target of PID, likely acts upstream of PID to regulate the activity of this protein in response to changes in calcium levels,; pinoid-binding protein 1 (PBP1); CONTAINS…	1.38535
30.3	signalling.calcium	phvul.005g062600.1	Vung17529|c0_g1_i5	(at1g53590 : 782,0) NTMC2T6,1; LOCATED IN: plasma membrane, vacuole; EXPRESSED IN: 23 plant structures; EXPRESSED DURING: 13 growth stages; CONTAINS InterPro DOMAIN/s: C2 membrane targeting protein (InterPro:IPR018029), C2 calcium/lipid-binding domain, CaLB (InterPro:IPR008973), C2 calcium-dependent membrane targeting (InterPro:IPR000008); BEST Arabidopsis thaliana protein match is: Calcium-depen…	3.853
30.3	signalling.calcium	phvul.004g055200.1	Vung138089|c0_g1_i1	(at1g76650 : 102,0) calmodulin-like 38 (CML38); CONTAINS InterPro DOMAIN/s: EF-Hand 1, calcium-binding site (InterPro:IPR018247), EF-HAND 2 (InterPro:IPR018249), EF-hand-like domain (InterPro:IPR011992), Calcium-binding EF-hand (InterPro:IPR002048); BEST Arabidopsis thaliana protein match is: Calcium-binding EF-hand family protein (TAIR:AT1G76640,1), & (gnl|cdd|35250 : 99,7) no description availa…	3.01992
30.3	signalling.calcium	phvul.007g230100.1	Vung143027|c0_g1_i7	(at3g52870 : 492,0) IQ calmodulin-binding motif family protein; CONTAINS InterPro DOMAIN/s: IQ calmodulin-binding region (InterPro:IPR000048); BEST Arabidopsis thaliana protein match is: calmodulin-binding family protein (TAIR:AT3G58480,1); Has 341 Blast hits to 277 proteins in 58 species: Archae - 0; Bacteria - 26; Metazoa - 0; Fungi - 100; Plants - 209; Viruses - 0; Other Eukaryotes - 6 (source…	1.26039
30.3	signalling.calcium	phvul.001g226100.1	Vung67283|c0_g1_i12	(gnl|cdd|71325 : 232,0) no description available & (at5g57580 : 193,0) Calmodulin-binding protein; CONTAINS InterPro DOMAIN/s: Calmodulin binding protein-like (InterPro:IPR012416); BEST Arabidopsis thaliana protein match is: Calmodulin-binding protein (TAIR:AT4G25800,2); Has 341 Blast hits to 322 proteins in 21 species: Archae - 0; Bacteria - 2; Metazoa - 0; Fungi - 0; Plants - 339; Viruses - 0; …	1.53749
30.3	signalling.calcium	phvul.001g002900.1	Vung54053|c1_g1_i3	(p53683|cdpk2_orysa : 616,0) Calcium-dependent protein kinase, isoform 2 (EC 2,7,11,1) (CDPK 2) - Oryza sativa (Rice) & (at1g76040 : 612,0) member of Calcium Dependent Protein Kinase; calcium-dependent protein kinase 29 (CPK29); FUNCTIONS IN: in 6 functions; INVOLVED IN: protein amino acid phosphorylation; LOCATED IN: nucleus, plasma membrane, cytoplasm; EXPRESSED IN: 23 plant structures; EXPRESS…	4.75628
30.3	signalling.calcium	phvul.001g027700.1	Vung167967|c1_g1_i14	(at1g27460 : 801,0) encodes a calmodulin-binding protein that is expressed in pollen, suspension culture cells, flowers, and fruits,; no pollen germination related 1 (NPGR1); FUNCTIONS IN: calmodulin binding; INVOLVED IN: biological_process unknown; LOCATED IN: plasma membrane; EXPRESSED IN: 23 plant structures; EXPRESSED DURING: 13 growth stages; CONTAINS InterPro DOMAIN/s: Tetratricopeptide-lik…	5.06023
30.3	signalling.calcium	phvul.001g231000.1	Vung158235|c2_g1_i1	(at1g18210 : 149,0) Calcium-binding EF-hand family protein; FUNCTIONS IN: calcium ion binding; INVOLVED IN: biological_process unknown; LOCATED IN: plasma membrane, vacuole; EXPRESSED IN: 25 plant structures; EXPRESSED DURING: 13 growth stages; CONTAINS InterPro DOMAIN/s: EF-Hand 1, calcium-binding site (InterPro:IPR018247), EF-HAND 2 (InterPro:IPR018249), EF-hand-like domain (InterPro:IPR011992)…	1.88713
30.3	signalling.calcium	phvul.006g194000.1	Vung152570|c0_g1_i1	(at4g27280 : 94,7) Calcium-binding EF-hand family protein; FUNCTIONS IN: calcium ion binding; INVOLVED IN: response to karrikin; EXPRESSED IN: 23 plant structures; EXPRESSED DURING: 13 growth stages; CONTAINS InterPro DOMAIN/s: EF-Hand 1, calcium-binding site (InterPro:IPR018247), EF-HAND 2 (InterPro:IPR018249), EF-hand-like domain (InterPro:IPR011992); BEST Arabidopsis thaliana protein match is:…	2.04799
30.3	signalling.calcium	phvul.002g329300.1	Vung20829|c0_g1_i1	(at1g18210 : 156,0) Calcium-binding EF-hand family protein; FUNCTIONS IN: calcium ion binding; INVOLVED IN: biological_process unknown; LOCATED IN: plasma membrane, vacuole; EXPRESSED IN: 25 plant structures; EXPRESSED DURING: 13 growth stages; CONTAINS InterPro DOMAIN/s: EF-Hand 1, calcium-binding site (InterPro:IPR018247), EF-HAND 2 (InterPro:IPR018249), EF-hand-like domain (InterPro:IPR011992)…	1.44887
30.5	signalling.G-proteins	phvul.010g085000.1	Vung84947|c1_g1_i3	(at3g60860 : 2488,0) SEC7-like guanine nucleotide exchange family protein; FUNCTIONS IN: binding, ARF guanyl-nucleotide exchange factor activity, guanyl-nucleotide exchange factor activity; INVOLVED IN: regulation of ARF protein signal transduction; LOCATED IN: intracellular; EXPRESSED IN: 24 plant structures; EXPRESSED DURING: 15 growth stages; CONTAINS InterPro DOMAIN/s: SEC7-like (InterPro:IPR…	2.62948
30.5	signalling.G-proteins	phvul.010g064200.1	Vung152339|c0_g1_i1	(at2g38360 : 239,0) prenylated RAB acceptor 1,B4 (PRA1,B4); CONTAINS InterPro DOMAIN/s: Prenylated rab acceptor PRA1 (InterPro:IPR004895); BEST Arabidopsis thaliana protein match is: prenylated RAB acceptor 1,B5 (TAIR:AT5G01640,1); Has 506 Blast hits to 506 proteins in 121 species: Archae - 0; Bacteria - 0; Metazoa - 113; Fungi - 53; Plants - 299; Viruses - 0; Other Eukaryotes - 41 (source: NCBI …	1.16192
30.5	signalling.G-proteins	phvul.003g010900.1	Vung143775|c0_g1_i6	(at2g23460 : 753,0) encodes a novel G-alpha protein that shares similarity to plant, yeast, and animal G-alpha proteins at the C-terminus, It contains an N-terminus that is as large as the C-terminus, is a member of a small family, and is expressed in all tissues examined, including roots, leaves, stems, flowers, and fruits,; extra-large G-protein 1 (XLG1); FUNCTIONS IN: signal transducer activit…	2.24426
30.5	signalling.G-proteins	phvul.003g227800.1	Vung119455|c0_g1_i1	(at2g44610 : 357,0) Encodes a GTP-binding protein with similarity to yeast YPT6 , RAB6 can complement the yeast YTP mutant,; RAB6A; FUNCTIONS IN: protein binding, GTP binding; INVOLVED IN: secretion by cell; LOCATED IN: plasma membrane, membrane fraction; EXPRESSED IN: 25 plant structures; EXPRESSED DURING: 15 growth stages; CONTAINS InterPro DOMAIN/s: Ras GTPase (InterPro:IPR001806), Small GTP-b…	1.6436
30.5	signalling.G-proteins	phvul.003g083600.1	Vung22769|c0_g2_i2	(at3g07880 : 287,0) SUPERCENTIPEDE1 (SCN1); FUNCTIONS IN: Rho GDP-dissociation inhibitor activity; INVOLVED IN: root epidermal cell differentiation, cell tip growth; LOCATED IN: cytoplasm; EXPRESSED IN: 25 plant structures; EXPRESSED DURING: 15 growth stages; CONTAINS InterPro DOMAIN/s: Immunoglobulin E-set (InterPro:IPR014756), RHO protein GDP dissociation inhibitor (InterPro:IPR000406); BEST Ar…	3.10412
30.5	signalling.G-proteins	phvul.005g099100.1	Vung65000|c3_g3_i2	(q40220|rac2_lotja : 340,0) Rac-like GTP-binding protein RAC2 - Lotus japonicus & (gnl|cdd|58016 : 332,0) no description available & (at1g20090 : 317,0) Member of the Rho GTPase family, Functions to organize the microtubular cytoskeleton in combination with RIC1 and RIC4, These interactions affect pavement cell morphogenesis and pollen tube growth, ROP2 expression is stimulated by brassinosteroid…	2.67962
30.5	signalling.G-proteins	phvul.007g084300.1	Vung130627|c1_g1_i2	(at1g07140 : 232,0) Encodes a putative Ran-binding protein (siRanBP),; SIRANBP; FUNCTIONS IN: Ran GTPase binding; INVOLVED IN: intracellular transport, protein import into nucleus, translocation; LOCATED IN: cellular_component unknown; EXPRESSED IN: 23 plant structures; EXPRESSED DURING: 16 growth stages; CONTAINS InterPro DOMAIN/s: Ran binding protein 1 (InterPro:IPR000156), Pleckstrin homology-…	1.71693
30.5	signalling.G-proteins	phvul.001g028900.1	Vung30965|c0_g1_i2	(at4g07410 : 907,0) Transducin family protein / WD-40 repeat family protein; FUNCTIONS IN: nucleotide binding; INVOLVED IN: biological_process unknown; LOCATED IN: cellular_component unknown; EXPRESSED IN: 22 plant structures; EXPRESSED DURING: 13 growth stages; CONTAINS InterPro DOMAIN/s: WD40 repeat-like-containing domain (InterPro:IPR011046), WD40 repeat 2 (InterPro:IPR019782), WD40-repeat-con…	1.45337
30.5	signalling.G-proteins	phvul.001g216500.1	Vung69437|c0_g1_i2	(at4g01860 : 1248,0) Transducin family protein / WD-40 repeat family protein; CONTAINS InterPro DOMAIN/s: WD40 repeat 2 (InterPro:IPR019782), WD40 repeat-like-containing domain (InterPro:IPR011046), WD40 repeat, conserved site (InterPro:IPR019775), WD40-repeat-containing domain (InterPro:IPR017986), WD40/YVTN repeat-like-containing domain (InterPro:IPR015943), WD40 repeat (InterPro:IPR001680), WD…	6.93384
30.5	signalling.G-proteins	phvul.006g116300.1	Vung70169|c1_g1_i2	(at2g46710 : 457,0) Rho GTPase activating protein with PAK-box/P21-Rho-binding domain; FUNCTIONS IN: Rac GTPase activator activity; INVOLVED IN: signal transduction; LOCATED IN: intracellular; EXPRESSED IN: 22 plant structures; EXPRESSED DURING: 13 growth stages; CONTAINS InterPro DOMAIN/s: PAK-box/P21-Rho-binding (InterPro:IPR000095), Rho GTPase activation protein (InterPro:IPR008936), RhoGAP (I…	2.78589
30.5	signalling.G-proteins	phvul.006g129100.1	Vung103043|c0_g2_i2	(at4g05410 : 497,0) Encodes a nucleolar protein with seven WD40-repeats that plays a role in embryo sac development and is critical for the correct positioning of the division plane of zygote and the apical cell lineage in Arabidopsis, YAO may act by modulating nucleolar function, such as rRNA biogenesis, during early embryogenesis and gametogenesis,; YAOZHE (YAO); FUNCTIONS IN: nucleotide bindin…	1.02512
30.5	signalling.G-proteins	phvul.006g220300.1	Vung22486|c1_g1_i8	(at3g11730 : 328,0) Encodes a member of the Rab GTPase family of proteins, This protein interacts with the tail region of a myosin XI protein (AT5G43900) in a GTP-dependent manner, It has also been identified as an isoprenylated protein,; ATFP8; FUNCTIONS IN: GTP binding, myosin XI tail binding, GTP-dependent protein binding; INVOLVED IN: protein transport, small GTPase mediated signal transducti…	5.64454
30.5	signalling.G-proteins	phvul.002g106600.2	Vung101117|c1_g1_i4	(q35638|rho1_pea : 356,0) Rac-like GTP-binding protein RHO1 (GTPase protein ROP1) - Pisum sativum (Garden pea) & (at2g17800 : 352,0) A member of ROP GTPase family, Rac-like GTP-binding protein ARAC1/ATGP2, Encodes a geranylgeranylated GTP binding protein, Involved in the auxin-activated 26S proteasome-dependent Aux/IAA proteolysis pathway,; Arabidopsis RAC-like 1 (ARAC1); FUNCTIONS IN: GTP bindin…	-4.67583
30.6	signalling.MAP kinases	phvul.005g115900.1	Vung76468|c0_g2_i1	(gnl|cdd|35419 : 289,0) no description available & (at2g32510 : 287,0) member of MEKK subfamily; mitogen-activated protein kinase kinase kinase 17 (MAPKKK17); FUNCTIONS IN: protein serine/threonine kinase activity, protein kinase activity, kinase activity, ATP binding; INVOLVED IN: protein amino acid phosphorylation; EXPRESSED IN: 7 plant structures; EXPRESSED DURING: 4 anthesis, petal differenti…	1.65379
30.6	signalling.MAP kinases	phvul.011g102000.1	Vung76468|c0_g3_i1	(at2g32510 : 303,0) member of MEKK subfamily; mitogen-activated protein kinase kinase kinase 17 (MAPKKK17); FUNCTIONS IN: protein serine/threonine kinase activity, protein kinase activity, kinase activity, ATP binding; INVOLVED IN: protein amino acid phosphorylation; EXPRESSED IN: 7 plant structures; EXPRESSED DURING: 4 anthesis, petal differentiation and expansion stage; CONTAINS InterPro DOMAIN…	4.24076
30.6	signalling.MAP kinases	phvul.006g077100.1	Vung97503|c3_g2_i7	(at5g58350 : 605,0) Encodes a member of the WNK family (9 members in all) of protein kinases, the structural design of which is clearly distinct from those of other known protein kinases, such as receptor-like kinases and mitogen-activated protein kinases, Its transcription is under the control of circadian rhythms,; with no lysine (K) kinase 4 (WNK4); FUNCTIONS IN: protein kinase activity, kinas…	-1.4024
30.7	signalling.14-3-3 proteins	phvul.003g043200.1	Vung26756|c0_g2_i2	(at1g26480 : 384,0) 14-3-3 protein GF14iota (grf12); general regulatory factor 12 (GRF12); FUNCTIONS IN: protein phosphorylated amino acid binding; LOCATED IN: cellular_component unknown; EXPRESSED IN: 6 plant structures; EXPRESSED DURING: L mature pollen stage, M germinated pollen stage, 4 anthesis, petal differentiation and expansion stage; CONTAINS InterPro DOMAIN/s: 14-3-3 protein (InterPro:I…	1.26897
30.8	signalling.misc	phvul.007g197000.1	Vung71891|c0_g2_i1	(at1g02900 : 121,0) Member of a diversely expressed predicted peptide family showing sequence similarity to tobacco Rapid Alkalinization Factor (RALF), and is believed to play an essential role in the physiology of Arabidopsis, Consists of a single exon and is characterized by a conserved C-terminal motif and N-terminal signal peptide, Mediates Ca2+-dependent signaling,; rapid alkalinization fact…	1.29488
30.8	signalling.misc	phvul.001g266400.1	Vung36368|c0_g2_i1	(gnl|cdd|69043 : 87,3) no description available & (at3g23805 : 85,9) Member of a diversely expressed predicted peptide family showing sequence similarity to tobacco Rapid Alkalinization Factor (RALF), and is believed to play an essential role in the physiology of Arabidopsis, Consists of a single exon and is characterized by a conserved C-terminal motif and N-terminal signal peptide,; ralf-like 2…	5.39489
30.11	signalling.light	phvul.005g028600.1	Vung49228|c2_g2_i2	(at5g59560 : 294,0) Encodes a novel protein conserved in higher eukaryotes, Normal function of the protein is required for normal oscillator function during circadian rhythm, Mutant analyses also suggest a role in phytochrome B (phyB)-mediated light signaling,; SENSITIVITY TO RED LIGHT REDUCED 1 (SRR1); FUNCTIONS IN: molecular_function unknown; INVOLVED IN: regulation of circadian rhythm, red, fa…	-1.43058
30.11	signalling.light	phvul.007g062000.1	Vung129240|c0_g1_i2	(p11432|eli_pea : 202,0) Early light-induced protein, chloroplast precursor (ELIP) - Pisum sativum (Garden pea) & (at3g22840 : 175,0) Encodes an early light-inducible protein,; EARLY LIGHT-INDUCABLE PROTEIN (ELIP1); BEST Arabidopsis thaliana protein match is: Chlorophyll A-B binding family protein (TAIR:AT4G14690,1); Has 319 Blast hits to 319 proteins in 50 species: Archae - 0; Bacteria - 5; Meta…	-5.26994
30.11	signalling.light	phvul.001g203800.1	Vung8035|c1_g1_i6	(at1g03010 : 822,0) Phototropic-responsive NPH3 family protein; FUNCTIONS IN: signal transducer activity; INVOLVED IN: response to light stimulus, pollen tube growth; EXPRESSED IN: leaf apex, inflorescence meristem, cauline leaf, root, flower; EXPRESSED DURING: M germinated pollen stage, petal differentiation and expansion stage; CONTAINS InterPro DOMAIN/s: NPH3 (InterPro:IPR004249), BTB/POZ fold…	3.78328
30.11	signalling.light	phvul.001g085200.1	Vung33200|c0_g1_i1	(gnl|cdd|70663 : 137,0) no description available & (ipr009856 : 113,11435) Light regulated Lir1 & (at3g26740 : 92,8) transcripts are differentially regulated at the level of mRNA stability at different times of day controlled by the circadian clock, mRNAs are targets of the mRNA degradation pathway mediated by the downstream (DST) instability determinant,; CCR-like (CCL); FUNCTIONS IN: molecular_…	-1.19914
30.11	signalling.light	phvul.006g080400.1	Vung5064|c3_g1_i7	(at2g30520 : 745,0) light inducible root phototropism 2 encoding a signal transducer of the phototropic response in Arabidopsis; ROOT PHOTOTROPISM 2 (RPT2); FUNCTIONS IN: signal transducer activity; INVOLVED IN: phototropism; LOCATED IN: nucleus; EXPRESSED IN: 22 plant structures; EXPRESSED DURING: 13 growth stages; CONTAINS InterPro DOMAIN/s: NPH3 (InterPro:IPR004249), BTB/POZ (InterPro:IPR01306…	-1.35349
30.11	signalling.light	phvul.002g241100.1	Vung122852|c0_g1_i5	(at4g18810 : 791,0) NAD(P)-binding Rossmann-fold superfamily protein; FUNCTIONS IN: binding, catalytic activity; INVOLVED IN: metabolic process; EXPRESSED IN: 22 plant structures; EXPRESSED DURING: 13 growth stages; CONTAINS InterPro DOMAIN/s: NAD(P)-binding domain (InterPro:IPR016040), NADH:ubiquinone oxidoreductase intermediate-associated protein 30 (InterPro:IPR013857), NmrA-like (InterPro:IPR…	-4.2891
30.99	signalling.unspecified	phvul.003g279800.1	Vung75131|c0_g1_i1	(at5g12080 : 516,0) mechanosensitive channel of small conductance-like 10 (MSL10); FUNCTIONS IN: mechanically-gated ion channel activity; INVOLVED IN: detection of mechanical stimulus; LOCATED IN: plasma membrane, membrane; EXPRESSED IN: 26 plant structures; EXPRESSED DURING: 13 growth stages; CONTAINS InterPro DOMAIN/s: Membrane protein, At2g17000, predicted (InterPro:IPR016688), Like-Sm ribonuc…	1.10503
30.99	signalling.unspecified	phvul.009g081300.1	Vung148924|c0_g1_i1	(at5g12080 : 766,0) mechanosensitive channel of small conductance-like 10 (MSL10); FUNCTIONS IN: mechanically-gated ion channel activity; INVOLVED IN: detection of mechanical stimulus; LOCATED IN: plasma membrane, membrane; EXPRESSED IN: 26 plant structures; EXPRESSED DURING: 13 growth stages; CONTAINS InterPro DOMAIN/s: Membrane protein, At2g17000, predicted (InterPro:IPR016688), Like-Sm ribonuc…	-4.96289
20.1.3	stress.biotic.signalling	phvul.003g129200.1	Vung128398|c0_g4_i11	(at1g19180 : 129,0) JAZ1 is a nuclear-localized protein involved in jasmonate signaling, JAZ1 transcript levels rise in response to a jasmonate stimulus, JAZ1 can interact with the COI1 F-box subunit of an SCF E3 ubiquitin ligase in a yeast-two-hybrid assay only in the presence of jasmonate-isoleucine (JA-ILE) or coronatine, Application of jasmonate methyl ester to Arabidopsis roots reduces the l…	2.35771
20.1.3	stress.biotic.signalling	phvul.009g225300.1	Vung153373|c1_g1_i2	(at1g74950 : 125,0) TIFY10B; CONTAINS InterPro DOMAIN/s: Tify (InterPro:IPR010399), CCT domain-like (InterPro:IPR018467); BEST Arabidopsis thaliana protein match is: jasmonate-zim-domain protein 1 (TAIR:AT1G19180,1); Has 432 Blast hits to 427 proteins in 29 species: Archae - 0; Bacteria - 0; Metazoa - 0; Fungi - 0; Plants - 432; Viruses - 0; Other Eukaryotes - 0 (source: NCBI BLink), & (reliabili…	5.49396
20.1.3.1	stress.biotic.signalling.MLO-like	phvul.010g034400.1	Vung81893|c1_g1_i7	(at4g02600 : 639,0) A member of a large family of seven-transmembrane domain proteins specific to plants, homologs of the barley mildew resistance locus o (MLO) protein, The Arabidopsis genome contains 15 genes encoding MLO proteins, with localization in plasma membrane, Phylogenetic analysis revealed four clades of closely-related AtMLO genes, ATMLO1 belongs to the clade II, with ATMLO13 and ATM…	1.12366
20.1.3.1	stress.biotic.signalling.MLO-like	phvul.007g093600.1	Vung137758|c0_g1_i13	(gnl|cdd|66748 : 623,0) no description available & (at1g61560 : 542,0) A member of a large family of seven-transmembrane domain proteins specific to plants, homologs of the barley mildew resistance locus o (MLO) protein, The Arabidopsis genome contains 15 genes encoding MLO proteins, with localization in plasma membrane, Phylogenetic analysis revealed four clades of closely-related AtMLO genes, A…	-2.41756
20.1.3.1	stress.biotic.signalling.MLO-like	phvul.002g117900.1	Vung40245|c0_g1_i1	(gnl|cdd|66748 : 673,0) no description available & (at2g17480 : 651,0) A member of a large family of seven-transmembrane domain proteins specific to plants, homologs of the barley mildew resistance locus o (MLO) protein, The Arabidopsis genome contains 15 genes encoding MLO proteins, with localization in plasma membrane, Phylogenetic analysis revealed four clades of closely-related AtMLO genes, A…	-1.5293

## Sheet: Module-RgenesPRproteins
BinCode	BinName	ID_P.vulgaris	ID_ATCs	Description	Log2FC
20.1.7	stress.biotic.PR-proteins	phvul.010g008700.1	Vung27401|c1_g1_i3	(at5g36930 : 474,0) Disease resistance protein (TIR-NBS-LRR class) family; FUNCTIONS IN: transmembrane receptor activity, ATP binding; INVOLVED IN: signal transduction, defense response, apoptosis, innate immune response; LOCATED IN: intrinsic to membrane; EXPRESSED IN: 19 plant structures; EXPRESSED DURING: 13 growth stages; CONTAINS InterPro DOMAIN/s: NB-ARC (InterPro:IPR002182), Toll-Interleuk…	5.5641
20.1.7	stress.biotic.PR-proteins	phvul.010g025700.1	Vung38005|c5_g4_i4	(at5g36930 : 654,0) Disease resistance protein (TIR-NBS-LRR class) family; FUNCTIONS IN: transmembrane receptor activity, ATP binding; INVOLVED IN: signal transduction, defense response, apoptosis, innate immune response; LOCATED IN: intrinsic to membrane; EXPRESSED IN: 19 plant structures; EXPRESSED DURING: 13 growth stages; CONTAINS InterPro DOMAIN/s: NB-ARC (InterPro:IPR002182), Toll-Interleuk…	6.78782
20.1.7	stress.biotic.PR-proteins	phvul.003g247500.1	Vung21816|c1_g1_i1	(at5g66900 : 387,0) Disease resistance protein (CC-NBS-LRR class) family; FUNCTIONS IN: ATP binding; INVOLVED IN: apoptosis, defense response; CONTAINS InterPro DOMAIN/s: NB-ARC (InterPro:IPR002182), Powdery mildew resistance protein, RPW8 domain (InterPro:IPR008808), Disease resistance protein (InterPro:IPR000767); BEST Arabidopsis thaliana protein match is: Disease resistance protein (CC-NBS-LR…	1.1659
20.1.7	stress.biotic.PR-proteins	phvul.004g058700.1	Vung129014|c5_g2_i6	(at5g17680 : 434,0) disease resistance protein (TIR-NBS-LRR class), putative; FUNCTIONS IN: transmembrane receptor activity, ATP binding; INVOLVED IN: signal transduction, defense response, apoptosis, innate immune response; LOCATED IN: intrinsic to membrane; EXPRESSED IN: 14 plant structures; EXPRESSED DURING: 6 growth stages; CONTAINS InterPro DOMAIN/s: Leucine-rich repeat, typical subtype (Int…	-1.69275
20.1.7	stress.biotic.PR-proteins	phvul.004g100000.1	Vung113537|c1_g4_i1	(at2g34930 : 355,0) disease resistance family protein / LRR family protein; INVOLVED IN: signal transduction, defense response to fungus, defense response; LOCATED IN: cell wall; EXPRESSED IN: 10 plant structures; EXPRESSED DURING: 7 growth stages; CONTAINS InterPro DOMAIN/s: Leucine-rich repeat-containing N-terminal domain, type 2 (InterPro:IPR013210), Leucine-rich repeat (InterPro:IPR001611); B…	2.4248
20.1.7	stress.biotic.PR-proteins	phvul.007g077800.1	Vung124113|c0_g1_i1	(at5g24090 : 368,0) Chitinase A (class III) expressed exclusively under environmental stress conditions,; chitinase A (CHIA); FUNCTIONS IN: cation binding, hydrolase activity, hydrolyzing O-glycosyl compounds, catalytic activity; INVOLVED IN: response to salt stress, response to cold, cellular response to water deprivation, response to wounding, response to light intensity; LOCATED IN: endomembra…	1.39729
20.1.7.6.1	stress.biotic.PR-proteins.proteinase inhibitors.trypsin inhibitor	phvul.003g129800.1	Vung148579|c1_g1_i10	(at1g19110 : 850,0) inter-alpha-trypsin inhibitor heavy chain-related; FUNCTIONS IN: molecular_function unknown; INVOLVED IN: biological_process unknown; LOCATED IN: plasma membrane, membrane; EXPRESSED IN: 24 plant structures; EXPRESSED DURING: 15 growth stages; CONTAINS InterPro DOMAIN/s: von Willebrand factor, type A (InterPro:IPR002035); BEST Arabidopsis thaliana protein match is: unknown pro…	-6.11273

## Sheet: Module-OxidativeStress
BinCode	BinName	ID_P.vulgaris	ID_CTS	Description	Log2FC
21.1	redox.thioredoxin	phvul.003g070700.1	Vung148207|c0_g1_i1	(at5g39950 : 117,0) encodes a cytosolic thioredoxin that reduces disulfide bridges of target proteins by the reversible formation of a disulfide bridge between two neighboring Cys residues present in the active site, Thioredoxins have been found to regulate a variety of biological reactions in prokaryotic and eukaryotic cells,; thioredoxin 2 (TRX2); FUNCTIONS IN: oxidoreductase activity, acting o…	4.02674
21.1	redox.thioredoxin	phvul.009g012800.1	Vung10775|c0_g1_i1	(q07090|trxh2_tobac : 181,0) Thioredoxin H-type 2 (TRX-H2) - Nicotiana tabacum (Common tobacco) & (at3g51030 : 169,0) encodes a cytosolic thioredoxin that reduces disulfide bridges of target proteins by the reversible formation of a disulfide bridge between two neighboring Cys residues present in the active site, Thioredoxins have been found to regulate a variety of biological reactions in prokar…	1.42578
21.1	redox.thioredoxin	phvul.009g160600.1	Vung143788|c0_g1_i3	(at5g51010 : 139,0) Rubredoxin-like superfamily protein; FUNCTIONS IN: electron carrier activity, metal ion binding; EXPRESSED IN: 22 plant structures; EXPRESSED DURING: 13 growth stages; CONTAINS InterPro DOMAIN/s: Rubredoxin-type Fe(Cys)4 protein (InterPro:IPR004039); BEST Arabidopsis thaliana protein match is: rubredoxin family protein (TAIR:AT5G17170,1); Has 30201 Blast hits to 17322 proteins…	2.13345
21.1	redox.thioredoxin	phvul.009g186300.1	Vung88311|c1_g1_i3	(at1g08570 : 229,0) Encodes a member of the thioredoxin family protein, Located in the chloroplast, Shows high activity towards the chloroplast 2-Cys peroxiredoxin A, and poor activity towards the chloroplast NADP-malate dehydrogenase,; atypical CYS HIS rich thioredoxin 4 (ACHT4); FUNCTIONS IN: oxidoreductase activity, acting on sulfur group of donors, disulfide as acceptor; INVOLVED IN: cell red…	-5.31031
21.1.1	redox.thioredoxin.PDIL	phvul.005g135600.1	Vung75625|c0_g4_i2	(at5g60640 : 685,0) Encodes a protein disulfide isomerase-like (PDIL) protein, a member of a multigene family within the thioredoxin (TRX) superfamily, Unlike several other PDI family members, transcript levels for this gene are not up-regulated in response to three different chemical inducers of ER stress (dithiothreitol, beta-mercaptoethanol, and tunicamycin), However, the level of transcripts …	1.07298
21.1.1	redox.thioredoxin.PDIL	phvul.011g079000.1	Vung75625|c0_g4_i4	(at5g60640 : 650,0) Encodes a protein disulfide isomerase-like (PDIL) protein, a member of a multigene family within the thioredoxin (TRX) superfamily, Unlike several other PDI family members, transcript levels for this gene are not up-regulated in response to three different chemical inducers of ER stress (dithiothreitol, beta-mercaptoethanol, and tunicamycin), However, the level of transcripts …	1.05115
21.2	redox.ascorbate and glutathione	phvul.003g014500.1	Vung110307|c0_g1_i1	(at1g14730 : 196,0) Cytochrome b561/ferric reductase transmembrane protein family; LOCATED IN: endomembrane system, integral to membrane; EXPRESSED IN: 16 plant structures; EXPRESSED DURING: 7 growth stages; CONTAINS InterPro DOMAIN/s: Cytochrome b561, eukaryote (InterPro:IPR004877), Cytochrome b561/ferric reductase transmembrane (InterPro:IPR006593); BEST Arabidopsis thaliana protein match is: C…	2.05569
21.2	redox.ascorbate and glutathione	phvul.003g011800.1	Vung112779|c1_g1_i2	(at3g19000 : 401,0) 2-oxoglutarate (2OG) and Fe(II)-dependent oxygenase superfamily protein; FUNCTIONS IN: oxidoreductase activity, acting on paired donors, with incorporation or reduction of molecular oxygen, 2-oxoglutarate as one donor, and incorporation of one atom each of oxygen into both donors, oxidoreductase activity; LOCATED IN: cellular_component unknown; EXPRESSED IN: 22 plant structure…	2.2543
21.2	redox.ascorbate and glutathione	phvul.002g182100.1	Vung143552|c0_g1_i1	(at1g14730 : 196,0) Cytochrome b561/ferric reductase transmembrane protein family; LOCATED IN: endomembrane system, integral to membrane; EXPRESSED IN: 16 plant structures; EXPRESSED DURING: 7 growth stages; CONTAINS InterPro DOMAIN/s: Cytochrome b561, eukaryote (InterPro:IPR004877), Cytochrome b561/ferric reductase transmembrane (InterPro:IPR006593); BEST Arabidopsis thaliana protein match is: C…	2.46323
21.2.1	redox.ascorbate and glutathione.ascorbate	phvul.006g011600.1	Vung100020|c3_g2_i1	(q40588|aso_tobac : 822,0) L-ascorbate oxidase precursor (EC 1,10,3,3) (Ascorbase) (ASO) - Nicotiana tabacum (Common tobacco) & (at5g21105 : 799,0) Plant L-ascorbate oxidase; FUNCTIONS IN: oxidoreductase activity, L-ascorbate oxidase activity, copper ion binding; INVOLVED IN: oxidation reduction; EXPRESSED IN: 23 plant structures; EXPRESSED DURING: 13 growth stages; CONTAINS InterPro DOMAIN/s: Mu…	1.49204
21.2.1	redox.ascorbate and glutathione.ascorbate	phvul.002g107000.1	Vung39886|c0_g2_i1	(q6ty83|apx3_orysa : 384,0) Probable L-ascorbate peroxidase 3 (EC 1,11,1,11) (OsAPx03) - Oryza sativa (Rice) & (at4g35000 : 382,0) Encodes a microsomal ascorbate peroxidase APX3, Ascorbate peroxidases are enzymes that scavenge hydrogen peroxide in plant cells, Eight types of APX have been described for Arabidopsis: three cytosolic (APX1, APX2, APX6), two chloroplastic types (stromal sAPX, thylako…	1.92202
21.2.1.2	redox.ascorbate and glutathione.ascorbate.GDP-L-galactose-hexose-1-phosphate guanyltransferase	phvul.008g269600.1	Vung93874|c6_g1_i5	(at4g26850 : 653,0) Encodes a novel protein involved in ascorbate biosynthesis, which was shown to catalyze the transfer of GMP from GDP-galactose to a variety of hexose-1-phosphate acceptors, Recessive mutation has a reduced amount of vitamin C, lower level of non-photochemical quenching, and reduced rate of conversion of violaxanthin to zeaxanthin in high light,; vitamin c defective 2 (VTC2); F…	4.3208
21.2.2	redox.ascorbate and glutathione.glutathione	phvul.004g173700.1	Vung40284|c0_g1_i9	(at4g29210 : 693,0) The gene encodes a gamma-glutamyltransferase (AKA gamma-glutamyl transpeptidase, EC 2,3,2,2) that is located in the vacuole and is most active in roots, The encoded enzyme is involved in the initial degradation of glutathione conjugates in this cell compartment, It is also induced by xenobiotics and contributes to xenobiotics metabolism, Note that conflicting nomenclature exis…	-1.03111
21.2.2	redox.ascorbate and glutathione.glutathione	phvul.002g288800.1	Vung28675|c0_g1_i1	(at1g63460 : 261,0) glutathione peroxidase 8 (GPX8); FUNCTIONS IN: glutathione peroxidase activity; INVOLVED IN: response to oxidative stress, oxidation reduction; LOCATED IN: cellular_component unknown; EXPRESSED IN: 22 plant structures; EXPRESSED DURING: 13 growth stages; CONTAINS InterPro DOMAIN/s: Thioredoxin fold (InterPro:IPR012335), Thioredoxin-like fold (InterPro:IPR012336), Glutathione p…	-1.22802
21.4	redox.glutaredoxins	phvul.008g042000.1	Vung156641|c2_g1_i5	(at3g28850 : 284,0) Glutaredoxin family protein; FUNCTIONS IN: electron carrier activity, protein disulfide oxidoreductase activity; INVOLVED IN: N-terminal protein myristoylation, cell redox homeostasis; LOCATED IN: plasma membrane; EXPRESSED IN: 24 plant structures; EXPRESSED DURING: 15 growth stages; CONTAINS InterPro DOMAIN/s: Thioredoxin fold (InterPro:IPR012335), Glutaredoxin (InterPro:IPR0…	1.51771
21.4	redox.glutaredoxins	phvul.001g197100.1	Vung127742|c0_g1_i1	(gnl|cdd|38035 : 202,0) no description available & (at5g06470 : 191,0) Glutaredoxin family protein; FUNCTIONS IN: electron carrier activity, protein disulfide oxidoreductase activity; INVOLVED IN: cell redox homeostasis; CONTAINS InterPro DOMAIN/s: Thioredoxin fold (InterPro:IPR012335), Glutaredoxin (InterPro:IPR002109), Thioredoxin-like fold (InterPro:IPR012336); BEST Arabidopsis thaliana protei…	3.6603
21.6	redox.dismutases and catalases	phvul.007g135400.1	Vung64975|c1_g2_i26	(p28759|sodf_soybn : 444,0) Superoxide dismutase [Fe], chloroplast precursor (EC 1,15,1,1) - Glycine max (Soybean) & (at5g51100 : 337,0) Fe superoxide dismutase whose mRNA levels are increased in response to exposure to UV-B,; Fe superoxide dismutase 2 (FSD2); FUNCTIONS IN: superoxide dismutase activity; INVOLVED IN: response to UV; LOCATED IN: chloroplast, nucleoid; EXPRESSED IN: 22 plant struct…	-1.12921
26.12	misc.peroxidases	phvul.005g113800.1	Vung111104|c0_g2_i5	(at4g11290 : 457,0) Peroxidase superfamily protein; FUNCTIONS IN: peroxidase activity, heme binding; INVOLVED IN: response to oxidative stress, oxidation reduction; LOCATED IN: endomembrane system; EXPRESSED IN: 11 plant structures; EXPRESSED DURING: 7 growth stages; CONTAINS InterPro DOMAIN/s: Haem peroxidase (InterPro:IPR010255), Plant peroxidase (InterPro:IPR000823), Peroxidases heam-ligand bi…	5.77512
26.12	misc.peroxidases	phvul.011g128200.1	Vung104127|c1_g2_i1	(gnl|cdd|29388 : 450,0) no description available & (at5g05340 : 359,0) Peroxidase superfamily protein; FUNCTIONS IN: protein binding, peroxidase activity; INVOLVED IN: response to oxidative stress, oxidation reduction; LOCATED IN: apoplast, cell wall; EXPRESSED IN: 9 plant structures; EXPRESSED DURING: LP,04 four leaves visible, 4 anthesis, C globular stage, petal differentiation and expansion st…	2.17207
26.12	misc.peroxidases	phvul.006g207100.1	Vung16847|c1_g1_i8	(p22196|per2_arahy : 490,0) Cationic peroxidase 2 precursor (EC 1,11,1,7) (PNPC2) - Arachis hypogaea (Peanut) & (gnl|cdd|29388 : 421,0) no description available & (at2g41480 : 398,0) Peroxidase superfamily protein; FUNCTIONS IN: peroxidase activity, heme binding; INVOLVED IN: oxidation reduction, response to oxidative stress; EXPRESSED IN: root, leaf; EXPRESSED DURING: LP,04 four leaves visible; …	2.65529
26.12	misc.peroxidases	phvul.006g129700.1	Vung87835|c5_g2_i2	(gnl|cdd|29388 : 460,0) no description available & (at2g38380 : 362,0) Peroxidase superfamily protein; FUNCTIONS IN: peroxidase activity, heme binding; INVOLVED IN: response to zinc ion, response to salt stress; LOCATED IN: plant-type cell wall; EXPRESSED IN: stem, root; CONTAINS InterPro DOMAIN/s: Haem peroxidase (InterPro:IPR010255), Plant peroxidase (InterPro:IPR000823), Peroxidases heam-ligan…	5.54681
26.12	misc.peroxidases	phvul.002g105400.1	Vung47437|c0_g1_i1	(at5g42180 : 401,0) Peroxidase superfamily protein; FUNCTIONS IN: peroxidase activity, heme binding; INVOLVED IN: oxidation reduction, response to oxidative stress; LOCATED IN: plant-type cell wall; EXPRESSED IN: 10 plant structures; EXPRESSED DURING: 4 anthesis, C globular stage, petal differentiation and expansion stage; CONTAINS InterPro DOMAIN/s: Haem peroxidase (InterPro:IPR010255), Plant pe…	2.5774
26.12	misc.peroxidases	phvul.002g012300.1	Vung10925|c0_g1_i4	(at4g37530 : 439,0) Peroxidase superfamily protein; FUNCTIONS IN: protein binding, peroxidase activity; INVOLVED IN: response to salt stress; LOCATED IN: endomembrane system; EXPRESSED IN: root; CONTAINS InterPro DOMAIN/s: Haem peroxidase (InterPro:IPR010255), Plant peroxidase (InterPro:IPR000823), Peroxidases heam-ligand binding site (InterPro:IPR019793), Haem peroxidase, plant/fungal/bacterial …	4.48896
26.9	misc.glutathione S transferases	phvul.005g054100.1	Vung97884|c0_g1_i2	(q03666|gstx4_tobac : 329,0) Probable glutathione S-transferase (EC 2,5,1,18) (Auxin-induced protein PCNT107) - Nicotiana tabacum (Common tobacco) & (at1g17180 : 317,0) Encodes glutathione transferase belonging to the tau class of GSTs, Naming convention according to Wagner et al, (2002),; glutathione S-transferase TAU 25 (GSTU25); CONTAINS InterPro DOMAIN/s: Thioredoxin fold (InterPro:IPR012335)…	1.1943
26.9	misc.glutathione S transferases	phvul.008g113700.1	Vung123265|c2_g4_i4	(p32110|gstx6_soybn : 327,0) Probable glutathione S-transferase (EC 2,5,1,18) (Heat shock protein 26A) (G2-4) - Glycine max (Soybean) & (gnl|cdd|35627 : 220,0) no description available & (at3g09270 : 202,0) Encodes glutathione transferase belonging to the tau class of GSTs, Naming convention according to Wagner et al, (2002),; glutathione S-transferase TAU 8 (GSTU8); FUNCTIONS IN: glutathione tra…	2.77672
26.9	misc.glutathione S transferases	phvul.007g013200.1	Vung59986|c0_g1_i1	(gnl|cdd|35627 : 199,0) no description available & (q03664|gstx3_tobac : 194,0) Probable glutathione S-transferase (EC 2,5,1,18) (Auxin-induced protein PCNT103) - Nicotiana tabacum (Common tobacco) & (at2g29460 : 177,0) Encodes glutathione transferase belonging to the tau class of GSTs, Naming convention according to Wagner et al, (2002),; glutathione S-transferase tau 4 (GSTU4); CONTAINS InterPr…	-1.26382
26.9	misc.glutathione S transferases	phvul.007g164900.1	Vung159685|c2_g1_i14	(at3g62760 : 269,0) Encodes glutathione transferase belonging to the phi class of GSTs, Naming convention according to Wagner et al, (2002),; ATGSTF13; CONTAINS InterPro DOMAIN/s: Thioredoxin fold (InterPro:IPR012335), Glutathione S-transferase, C-terminal (InterPro:IPR004046), Glutathione S-transferase, C-terminal-like (InterPro:IPR010987), Glutathione S-transferase/chloride channel, C-terminal …	1.395
26.9	misc.glutathione S transferases	phvul.001g173500.1	Vung90753|c3_g2_i6	(at5g02790 : 329,0) Glutathione transferase L3 (GSTL3); INVOLVED IN: response to cadmium ion; EXPRESSED IN: 24 plant structures; EXPRESSED DURING: 14 growth stages; CONTAINS InterPro DOMAIN/s: Thioredoxin fold (InterPro:IPR012335), Glutathione S-transferase, C-terminal (InterPro:IPR004046), Glutathione S-transferase, C-terminal-like (InterPro:IPR010987), Glutathione S-transferase/chloride channel…	-2.75637
26.9	misc.glutathione S transferases	phvul.006g079600.1	Vung93110|c0_g1_i1	(p25317|gstxa_tobac : 283,0) Probable glutathione S-transferase parA (EC 2,5,1,18) (Auxin-regulated protein parA) (STR246C protein) - Nicotiana tabacum (Common tobacco) & (at1g78370 : 243,0) Encodes glutathione transferase belonging to the tau class of GSTs, Naming convention according to Wagner et al, (2002),; glutathione S-transferase TAU 20 (GSTU20); FUNCTIONS IN: glutathione transferase activ…	2.27204

## Sheet: Module-CellWall
BinCode	BinName	ID_P.vulgaris	ID_ATCs	Description	Log2FC
10.1.1.1	cell wall.precursor synthesis.NDP sugar pyrophosphorylase.GDP mannose	phvul.008g230600.2	Vung135886|c2_g2_i3	(at2g39770 : 629,0) Encodes a GDP-mannose pyrophosphorylase/ mannose-1-pyrophosphatase, This enzyme provides GDP-mannose, which is used for cell wall carbohydrate biosynthesis and protein glycosylation as well as for ascorbate (vitamin C) biosynthesis, Mutations in this gene confer hypersensitivity to NH4+,; CYTOKINESIS DEFECTIVE 1 (CYT1); CONTAINS InterPro DOMAIN/s: Trimeric LpxA-like (InterPro:…	1.13809
10.1.2	cell wall.precursor synthesis.UGE	phvul.003g090500.1	Vung13755|c0_g1_i1	(q43070|gale1_pea : 605,0) UDP-glucose 4-epimerase (EC 5,1,3,2) (Galactowaldenase) (UDP-galactose 4-epimerase) - Pisum sativum (Garden pea) & (at1g12780 : 597,0) Encodes a UDP-glucose epimerase that catalyzes the interconversion of the sugar nucleotides UDP-glucose UDP-galactose via a UDP-4-keto-hexose intermediate, Responsive to stress,; UDP-D-glucose/UDP-D-galactose 4-epimerase 1 (UGE1); FUNCTI…	1.47848
10.1.4	cell wall.precursor synthesis.UDP-Glc dehydrogenase (UGD)	phvul.003g043700.1	Vung90194|c1_g3_i1	(gnl|cdd|37877 : 914,0) no description available & (at3g29360 : 890,0) UDP-glucose 6-dehydrogenase family protein; FUNCTIONS IN: in 6 functions; INVOLVED IN: oxidation reduction, metabolic process; LOCATED IN: cytosol, nucleus; EXPRESSED IN: 25 plant structures; EXPRESSED DURING: 16 growth stages; CONTAINS InterPro DOMAIN/s: UDP-glucose/GDP-mannose dehydrogenase, N-terminal (InterPro:IPR001732), …	1.19915
10.1.5	cell wall.precursor synthesis.UXS	phvul.007g146300.1	Vung55281|c1_g3_i9	(at3g62830 : 701,0) encodes an isoform of UDP-glucuronic acid decarboxylase, which is predicted to be membrane-bound by PSORT, This enzyme produces UDP-xylose, which is a substrate for many cell wall carbohydrates including hemicellulose and pectin, UDP-xylose is also known to feedback regulate several cell wall biosynthetic enzymes,; UDP-GLUCURONIC ACID DECARBOXYLASE 2 (UXS2); FUNCTIONS IN: UDP-…	1.0956
10.1.7	cell wall.precursor synthesis.GMD	phvul.002g110300.1	Vung109638|c0_g1_i1	(at5g66280 : 662,0) GDP-D-mannose 4,6-dehydratase; "GDP-D-mannose 4,6-dehydratase 1" (GMD1); FUNCTIONS IN: protein binding, GDP-mannose 4,6-dehydratase activity; INVOLVED IN: cellular metabolic process, GDP-mannose metabolic process, nucleotide-sugar metabolic process, metabolic process; LOCATED IN: intracellular; EXPRESSED IN: inflorescence meristem, root, flower; EXPRESSED DURING: 4 anthesis, p…	1.47786
10.2	cell wall.cellulose synthesis	phvul.008g255800.1	Vung161372|c1_g1_i1	(at4g31590 : 977,0) encodes a gene similar to cellulose synthase; Cellulose-synthase-like C5 (CSLC5); FUNCTIONS IN: cellulose synthase activity, transferase activity, transferring glycosyl groups; INVOLVED IN: biological_process unknown; LOCATED IN: nucleus; EXPRESSED IN: 23 plant structures; EXPRESSED DURING: 13 growth stages; CONTAINS InterPro DOMAIN/s: Glycosyl transferase, family 2 (InterPro:…	1.94282
10.2.1	cell wall.cellulose synthesis.cellulose synthase	phvul.005g022100.1	Vung11982|c3_g1_i1	(at5g05170 : 1915,0) Encodes a cellulose synthase isomer, CESA3 mutants have cellulose defect in the primary cell wall, Multiple lines of evidence suggest that CESA3, along with CESA1 and CESA6 are present in the same plasma membrane complex for cellulose biosynthesis, As inferred from the null role of secondary wall-type CesAs, included in a set of five primary wall-type CesAs that may support t…	1.57741
10.2.2	cell wall.cellulose synthesis.COBRA	phvul.008g029200.1	Vung119212|c4_g1_i6	(at5g60920 : 610,0) Encodes a glycosylphosphatidylinositol-anchored protein localized primarily in the plasma membrane of the longitudinal sides of root cells, Necessary for oriented cell expansion in Arabidopsis, Cob mutants have abnormal roots that expand radially rather than longitudinally under certain growth conditions,; COBRA (COB); FUNCTIONS IN: molecular_function unknown; INVOLVED IN: res…	2.78903
10.3.2	cell wall.hemicellulose synthesis.glucuronoxylan	phvul.009g055600.1	Vung17944|c1_g5_i1	(at1g19300 : 498,0) The PARVUS/GLZ1 gene encodes a putative family 8 glycosyl transferase that contributes to xylan biosynthesis, Its gene expression shows good co-variance with the IRX3 gene involved in secondary cell wall synthesis, PARVUS/GLZ1 is predicted to have galacturonosyltransferase activity and may be involved in the formation of the complex oligosaccharide sequence present at the redu…	1.21162
10.4.1.1	cell wall.pectin synthesis.homogalacturonan.Galacturonic Acid Trnasferase	phvul.008g074000.1	Vung150978|c1_g2_i4	(at3g61130 : 926,0) Encodes a protein with putative galacturonosyltransferase activity,; galacturonosyltransferase 1 (GAUT1); CONTAINS InterPro DOMAIN/s: Glycosyl transferase, family 8 (InterPro:IPR002495); BEST Arabidopsis thaliana protein match is: galacturonosyltransferase 3 (TAIR:AT4G38270,2); Has 1521 Blast hits to 1503 proteins in 273 species: Archae - 4; Bacteria - 491; Metazoa - 148; Fung…	-1.45293
10.5	cell wall.cell wall proteins	phvul.003g210600.2	Vung89545|c1_g1_i15	(at3g48530 : 555,0) SNF1-related protein kinase regulatory subunit gamma 1 (KING1); FUNCTIONS IN: molecular_function unknown; INVOLVED IN: biological_process unknown; LOCATED IN: plant-type cell wall; EXPRESSED IN: 23 plant structures; EXPRESSED DURING: 13 growth stages; CONTAINS InterPro DOMAIN/s: Cystathionine beta-synthase, core (InterPro:IPR000644); BEST Arabidopsis thaliana protein match is:…	-2.43094
10.5	cell wall.cell wall proteins	phvul.009g166800.1	Vung89545|c1_g1_i8	(at3g48530 : 588,0) SNF1-related protein kinase regulatory subunit gamma 1 (KING1); FUNCTIONS IN: molecular_function unknown; INVOLVED IN: biological_process unknown; LOCATED IN: plant-type cell wall; EXPRESSED IN: 23 plant structures; EXPRESSED DURING: 13 growth stages; CONTAINS InterPro DOMAIN/s: Cystathionine beta-synthase, core (InterPro:IPR000644); BEST Arabidopsis thaliana protein match is:…	-1.85943
10.5.1.1	cell wall.cell wall proteins.AGPs.AGP	phvul.006g057400.1	Vung81862|c4_g2_i2	(at5g55730 : 402,0) fasciclin-like arabinogalactan-protein 1 (Fla1); FASCICLIN-like arabinogalactan 1 (FLA1); CONTAINS InterPro DOMAIN/s: FAS1 domain (InterPro:IPR000782); BEST Arabidopsis thaliana protein match is: FASCICLIN-like arabinogalactan 2 (TAIR:AT4G12730,1), & (reliability: 804,0) & (original description: pacid=27165543 transcript=Phvul,006G057400,1 locus=Phvul,006G057400 ID=Phvul,006G0…	2.72481
10.5.2	cell wall.cell wall proteins.proline rich proteins	phvul.011g026700.1	Vung82271|c0_g1_i1	(at4g38770 : 134,0) Encodes one of four proline-rich proteins in Arabidopsis which are predicted to localize to the cell wall, Transcripts are most abundant in aerial organs of the plant,; proline-rich protein 4 (PRP4); CONTAINS InterPro DOMAIN/s: Pollen Ole e 1 allergen/extensin (InterPro:IPR006041); BEST Arabidopsis thaliana protein match is: proline-rich protein 2 (TAIR:AT2G21140,1); Has 14247…	3.70756
10.5.3	cell wall.cell wall proteins.LRR	phvul.002g307200.1	Vung23579|c0_g1_i1	(at4g29240 : 438,0) Leucine-rich repeat (LRR) family protein; INVOLVED IN: biological_process unknown; LOCATED IN: endomembrane system; EXPRESSED IN: 19 plant structures; EXPRESSED DURING: 13 growth stages; CONTAINS InterPro DOMAIN/s: Leucine-rich repeat-containing N-terminal domain, type 2 (InterPro:IPR013210), Leucine-rich repeat (InterPro:IPR001611); BEST Arabidopsis thaliana protein match is:…	1.90986
10.5.4	cell wall.cell wall proteins.HRGP	phvul.005g103700.1	Vung19032|c0_g2_i6	(at4g28300 : 241,0) Encodes a protein with 13,6% proline amino acids that is predicted to localize to the cell wall,; Protein of unknown function (DUF1421); CONTAINS InterPro DOMAIN/s: Protein of unknown function DUF1421 (InterPro:IPR010820); BEST Arabidopsis thaliana protein match is: Protein of unknown function (DUF1421) (TAIR:AT5G14540,1); Has 35333 Blast hits to 34131 proteins in 2444 species…	1.3036
10.6.1	cell wall.degradation.cellulases and beta -1.4-glucanases	phvul.009g016100.1	Vung21971|c0_g1_i1	(at1g75680 : 671,0) glycosyl hydrolase 9B7 (GH9B7); FUNCTIONS IN: hydrolase activity, hydrolyzing O-glycosyl compounds, catalytic activity; INVOLVED IN: carbohydrate metabolic process; LOCATED IN: plasma membrane; EXPRESSED IN: 23 plant structures; EXPRESSED DURING: 13 growth stages; CONTAINS InterPro DOMAIN/s: Six-hairpin glycosidase (InterPro:IPR012341), Glycoside hydrolase, family 9, active si…	1.16155
10.6.2	cell wall.degradation.mannan-xylose-arabinose-fucose	phvul.009g233200.1	Vung90011|c0_g1_i6	(at4g25810 : 382,0) xyloglucan endotransglycosylase-related protein (XTR6); xyloglucan endotransglycosylase 6 (XTR6); FUNCTIONS IN: hydrolase activity, acting on glycosyl bonds, xyloglucan:xyloglucosyl transferase activity, hydrolase activity, hydrolyzing O-glycosyl compounds; INVOLVED IN: carbohydrate metabolic process, cellular glucan metabolic process; LOCATED IN: cell wall; EXPRESSED IN: 14 p…	-3.28865
10.6.2	cell wall.degradation.mannan-xylose-arabinose-fucose	phvul.009g232500.1	Vung7408|c0_g1_i8	(p48981|bgal_maldo : 1162,0) Beta-galactosidase precursor (EC 3,2,1,23) (Lactase) (Acid beta-galactosidase) (Exo-(1-->4)-beta-D-galactanase) - Malus domestica (Apple) (Malus sylvestris) & (at4g26140 : 1099,0) putative beta-galactosidase; beta-galactosidase 12 (BGAL12); FUNCTIONS IN: cation binding, beta-galactosidase activity, hydrolase activity, hydrolyzing O-glycosyl compounds, catalytic activi…	-3.83731
10.6.2	cell wall.degradation.mannan-xylose-arabinose-fucose	phvul.008g153300.1	Vung4299|c1_g3_i20	(at1g78060 : 1003,0) Glycosyl hydrolase family protein; FUNCTIONS IN: hydrolase activity, hydrolyzing O-glycosyl compounds; INVOLVED IN: carbohydrate metabolic process; LOCATED IN: apoplast, cell wall, chloroplast, plant-type cell wall; EXPRESSED IN: 22 plant structures; EXPRESSED DURING: 13 growth stages; CONTAINS InterPro DOMAIN/s: Glycoside hydrolase, family 3, N-terminal (InterPro:IPR001764),…	2.66247
10.6.2	cell wall.degradation.mannan-xylose-arabinose-fucose	phvul.008g081200.1	Vung19348|c1_g3_i2	(at5g01930 : 653,0) Glycosyl hydrolase superfamily protein; FUNCTIONS IN: cation binding, hydrolase activity, hydrolyzing O-glycosyl compounds, catalytic activity; INVOLVED IN: carbohydrate metabolic process; LOCATED IN: endomembrane system; EXPRESSED IN: 19 plant structures; EXPRESSED DURING: 10 growth stages; CONTAINS InterPro DOMAIN/s: Glycoside hydrolase, catalytic core (InterPro:IPR017853), …	3.12932
10.6.2	cell wall.degradation.mannan-xylose-arabinose-fucose	phvul.007g215100.1	Vung74013|c3_g1_i1	(at1g02640 : 1107,0) encodes a protein similar to a beta-xylosidase located in the extracellular matrix, This is a member of glycosyl hydrolase family 3 and has six other closely related members,; beta-xylosidase 2 (BXL2); FUNCTIONS IN: hydrolase activity, hydrolyzing O-glycosyl compounds; INVOLVED IN: carbohydrate metabolic process; LOCATED IN: plant-type cell wall; EXPRESSED IN: 23 plant struct…	1.6197
10.6.2	cell wall.degradation.mannan-xylose-arabinose-fucose	phvul.001g219800.1	Vung34270|c2_g3_i1	(at5g66460 : 431,0) Glycosyl hydrolase superfamily protein; FUNCTIONS IN: cation binding, hydrolase activity, hydrolyzing O-glycosyl compounds, catalytic activity; INVOLVED IN: carbohydrate metabolic process; LOCATED IN: endomembrane system; EXPRESSED IN: 17 plant structures; EXPRESSED DURING: 4 anthesis, C globular stage, 4 leaf senescence stage, petal differentiation and expansion stage, E expa…	-3.51072
10.6.2	cell wall.degradation.mannan-xylose-arabinose-fucose	phvul.002g206800.1	Vung92516|c0_g1_i1	(at5g64570 : 1130,0) Encodes a beta-d-xylosidase that belongs to family 3 of glycoside hydrolases,; beta-D-xylosidase 4 (XYL4); FUNCTIONS IN: xylan 1,4-beta-xylosidase activity, hydrolase activity, hydrolyzing O-glycosyl compounds; INVOLVED IN: xylan catabolic process; LOCATED IN: apoplast, cell wall; EXPRESSED IN: 24 plant structures; EXPRESSED DURING: 13 growth stages; CONTAINS InterPro DOMAIN/…	5.05454
10.6.2	cell wall.degradation.mannan-xylose-arabinose-fucose	phvul.002g033500.1	Vung47805|c0_g1_i6	(at5g66460 : 555,0) Glycosyl hydrolase superfamily protein; FUNCTIONS IN: cation binding, hydrolase activity, hydrolyzing O-glycosyl compounds, catalytic activity; INVOLVED IN: carbohydrate metabolic process; LOCATED IN: endomembrane system; EXPRESSED IN: 17 plant structures; EXPRESSED DURING: 4 anthesis, C globular stage, 4 leaf senescence stage, petal differentiation and expansion stage, E expa…	1.1442
10.6.3	cell wall.degradation.pectate lyases and polygalacturonases	phvul.003g052000.1	Vung137817|c0_g1_i9	(at1g23760 : 689,0) Encodes aromatic rich glycoprotein JP630,; JP630; CONTAINS InterPro DOMAIN/s: BURP (InterPro:IPR004873); BEST Arabidopsis thaliana protein match is: polygalacturonase 2 (TAIR:AT1G70370,2); Has 1783 Blast hits to 1423 proteins in 248 species: Archae - 0; Bacteria - 362; Metazoa - 287; Fungi - 197; Plants - 556; Viruses - 4; Other Eukaryotes - 377 (source: NCBI BLink), & (gnl|cd…	6.92573
10.6.3	cell wall.degradation.pectate lyases and polygalacturonases	phvul.003g207400.1	Vung144153|c0_g1_i2	(at1g67750 : 600,0) Pectate lyase family protein; FUNCTIONS IN: pectate lyase activity; INVOLVED IN: biological_process unknown; LOCATED IN: endomembrane system; EXPRESSED IN: 21 plant structures; EXPRESSED DURING: 13 growth stages; CONTAINS InterPro DOMAIN/s: Pectin lyase fold/virulence factor (InterPro:IPR011050), AmbAllergen (InterPro:IPR018082), Pectate lyase/Amb allergen (InterPro:IPR002022)…	1.49226
10.6.3	cell wall.degradation.pectate lyases and polygalacturonases	phvul.008g123000.1	Vung35551|c2_g2_i2	(at3g07010 : 610,0) Pectin lyase-like superfamily protein; FUNCTIONS IN: lyase activity, pectate lyase activity; INVOLVED IN: biological_process unknown; LOCATED IN: endomembrane system; EXPRESSED IN: 22 plant structures; EXPRESSED DURING: 13 growth stages; CONTAINS InterPro DOMAIN/s: Pectin lyase fold/virulence factor (InterPro:IPR011050), AmbAllergen (InterPro:IPR018082), Pectate lyase/Amb alle…	3.6709
10.6.3	cell wall.degradation.pectate lyases and polygalacturonases	phvul.008g199400.1	Vung20466|c0_g1_i1	(at4g23820 : 632,0) Pectin lyase-like superfamily protein; FUNCTIONS IN: polygalacturonase activity; INVOLVED IN: carbohydrate metabolic process; LOCATED IN: endomembrane system; EXPRESSED IN: 22 plant structures; EXPRESSED DURING: 13 growth stages; CONTAINS InterPro DOMAIN/s: Pectin lyase fold/virulence factor (InterPro:IPR011050), Glycoside hydrolase, family 28 (InterPro:IPR000743), Pectin lyas…	2.40709
10.6.3	cell wall.degradation.pectate lyases and polygalacturonases	phvul.008g059700.1	Vung93502|c2_g1_i8	(at3g61490 : 698,0) Pectin lyase-like superfamily protein; FUNCTIONS IN: polygalacturonase activity; INVOLVED IN: carbohydrate metabolic process; LOCATED IN: endomembrane system; EXPRESSED IN: 22 plant structures; EXPRESSED DURING: 14 growth stages; CONTAINS InterPro DOMAIN/s: Pectin lyase fold/virulence factor (InterPro:IPR011050), Glycoside hydrolase, family 28 (InterPro:IPR000743), Pectin lyas…	3.0045
10.6.3	cell wall.degradation.pectate lyases and polygalacturonases	phvul.007g236800.1	Vung138583|c1_g1_i2	(at4g13710 : 665,0) Pectin lyase-like superfamily protein; FUNCTIONS IN: lyase activity, pectate lyase activity; INVOLVED IN: biological_process unknown; LOCATED IN: endomembrane system; EXPRESSED IN: 20 plant structures; EXPRESSED DURING: 6 growth stages; CONTAINS InterPro DOMAIN/s: Pectin lyase fold/virulence factor (InterPro:IPR011050), AmbAllergen (InterPro:IPR018082), Pectate lyase/Amb aller…	3.19193
10.6.3	cell wall.degradation.pectate lyases and polygalacturonases	phvul.006g028800.1	Vung25236|c0_g1_i1	(at4g23820 : 654,0) Pectin lyase-like superfamily protein; FUNCTIONS IN: polygalacturonase activity; INVOLVED IN: carbohydrate metabolic process; LOCATED IN: endomembrane system; EXPRESSED IN: 22 plant structures; EXPRESSED DURING: 13 growth stages; CONTAINS InterPro DOMAIN/s: Pectin lyase fold/virulence factor (InterPro:IPR011050), Glycoside hydrolase, family 28 (InterPro:IPR000743), Pectin lyas…	2.0639
10.6.3	cell wall.degradation.pectate lyases and polygalacturonases	phvul.002g201800.1	Vung146668|c0_g1_i1	(p58822|pgip2_phavu : 602,0) Polygalacturonase inhibitor 2 precursor (Polygalacturonase-inhibiting protein) (PGIP-2) - Phaseolus vulgaris (Kidney bean) (French bean) & (at5g06860 : 261,0) Encodes a polygalacturonase inhibiting protein involved in defense response, PGIPs inhibit the function of cell wall pectin degrading enzymes such as those produced by fungal pathogens, PGIP1 is induced by funga…	1.90356
10.7	cell wall.modification	phvul.003g231900.1	Vung124543|c0_g4_i2	(at4g37800 : 464,0) xyloglucan endotransglucosylase/hydrolase 7 (XTH7); FUNCTIONS IN: hydrolase activity, acting on glycosyl bonds, xyloglucan:xyloglucosyl transferase activity, hydrolase activity, hydrolyzing O-glycosyl compounds; INVOLVED IN: carbohydrate metabolic process, cellular glucan metabolic process; LOCATED IN: endomembrane system, cell wall, apoplast; EXPRESSED IN: 17 plant structures…	-4.75605
10.7	cell wall.modification	phvul.009g186400.1	Vung57978|c0_g1_i2	(at2g03090 : 362,0) member of Alpha-Expansin Gene Family, Naming convention from the Expansin Working Group (Kende et al, 2004, Plant Mol Bio), Involved in the formation of nematode-induced syncytia in roots of Arabidopsis thaliana,; expansin A15 (EXPA15); INVOLVED IN: plant-type cell wall modification involved in multidimensional cell growth, syncytium formation, unidimensional cell growth, plan…	3.92359
10.7	cell wall.modification	phvul.009g233200.1	Vung90011|c0_g1_i6	(at4g25810 : 382,0) xyloglucan endotransglycosylase-related protein (XTR6); xyloglucan endotransglycosylase 6 (XTR6); FUNCTIONS IN: hydrolase activity, acting on glycosyl bonds, xyloglucan:xyloglucosyl transferase activity, hydrolase activity, hydrolyzing O-glycosyl compounds; INVOLVED IN: carbohydrate metabolic process, cellular glucan metabolic process; LOCATED IN: cell wall; EXPRESSED IN: 14 p…	-3.28865
10.7	cell wall.modification	phvul.009g142800.1	Vung29768|c0_g2_i1	(at2g40610 : 367,0) member of Alpha-Expansin Gene Family, Naming convention from the Expansin Working Group (Kende et al, 2004, Plant Mol Bio), Involved in the formation of nematode-induced syncytia in roots of Arabidopsis thaliana,; expansin A8 (EXPA8); INVOLVED IN: plant-type cell wall modification involved in multidimensional cell growth, syncytium formation, unidimensional cell growth, plant-…	2.51237
10.7	cell wall.modification	phvul.005g104600.1	Vung5346|c0_g1_i1	(at4g28250 : 376,0) putative beta-expansin/allergen protein, Naming convention from the Expansin Working Group (Kende et al, 2004, Plant Mol Bio), Involved in the formation of nematode-induced syncytia in roots of Arabidopsis thaliana,; expansin B3 (EXPB3); INVOLVED IN: response to cyclopentenone, syncytium formation, plant-type cell wall organization, unidimensional cell growth, plant-type cell …	3.9905
10.7	cell wall.modification	phvul.011g117500.1	Vung121900|c1_g1_i3	(at4g28250 : 390,0) putative beta-expansin/allergen protein, Naming convention from the Expansin Working Group (Kende et al, 2004, Plant Mol Bio), Involved in the formation of nematode-induced syncytia in roots of Arabidopsis thaliana,; expansin B3 (EXPB3); INVOLVED IN: response to cyclopentenone, syncytium formation, plant-type cell wall organization, unidimensional cell growth, plant-type cell …	2.54403
10.7	cell wall.modification	phvul.008g232200.1	Vung119899|c3_g3_i2	(at2g39700 : 441,0) putative expansin, Naming convention from the Expansin Working Group (Kende et al, 2004, Plant Mol Bio), Involved in the formation of nematode-induced syncytia in roots of Arabidopsis thaliana,; expansin A4 (EXPA4); CONTAINS InterPro DOMAIN/s: Barwin-related endoglucanase (InterPro:IPR009009), Pollen allergen, N-terminal (InterPro:IPR014734), Expansin (InterPro:IPR002963), Rar…	1.15757
10.7	cell wall.modification	phvul.008g037500.1	Vung162165|c0_g1_i1	(at3g29030 : 312,0) Encodes an expansin, Naming convention from the Expansin Working Group (Kende et al, 2004, Plant Mol Bio); expansin A5 (EXPA5); INVOLVED IN: plant-type cell wall modification involved in multidimensional cell growth, unidimensional cell growth, plant-type cell wall loosening; LOCATED IN: endomembrane system, extracellular region; EXPRESSED IN: 21 plant structures; EXPRESSED DU…	1.76495
10.7	cell wall.modification	phvul.004g030500.1	Vung100508|c0_g1_i1	(at2g03090 : 337,0) member of Alpha-Expansin Gene Family, Naming convention from the Expansin Working Group (Kende et al, 2004, Plant Mol Bio), Involved in the formation of nematode-induced syncytia in roots of Arabidopsis thaliana,; expansin A15 (EXPA15); INVOLVED IN: plant-type cell wall modification involved in multidimensional cell growth, syncytium formation, unidimensional cell growth, plan…	1.9382
10.7	cell wall.modification	phvul.007g048300.1	Vung34819|c0_g1_i1	(at2g14620 : 451,0) xyloglucan endotransglucosylase/hydrolase 10 (XTH10); FUNCTIONS IN: hydrolase activity, acting on glycosyl bonds, xyloglucan:xyloglucosyl transferase activity, hydrolase activity, hydrolyzing O-glycosyl compounds; INVOLVED IN: carbohydrate metabolic process, cellular glucan metabolic process; LOCATED IN: endomembrane system, apoplast, cell wall; EXPRESSED IN: 9 plant structure…	2.89362
10.7	cell wall.modification	phvul.001g265300.1	Vung145780|c0_g1_i3	(p35694|bru1_soybn : 467,0) Brassinosteroid-regulated protein BRU1 precursor - Glycine max (Soybean) & (at4g14130 : 435,0) xyloglucan endotransglycosylase-related protein (XTR7); xyloglucan endotransglucosylase/hydrolase 15 (XTH15); FUNCTIONS IN: hydrolase activity, acting on glycosyl bonds, xyloglucan:xyloglucosyl transferase activity, hydrolase activity, hydrolyzing O-glycosyl compounds; INVOLV…	3.20723
10.7	cell wall.modification	phvul.006g077200.1	Vung112872|c0_g1_i1	(at2g40610 : 338,0) member of Alpha-Expansin Gene Family, Naming convention from the Expansin Working Group (Kende et al, 2004, Plant Mol Bio), Involved in the formation of nematode-induced syncytia in roots of Arabidopsis thaliana,; expansin A8 (EXPA8); INVOLVED IN: plant-type cell wall modification involved in multidimensional cell growth, syncytium formation, unidimensional cell growth, plant-…	2.42654
10.7	cell wall.modification	phvul.002g136200.1	Vung52320|c0_g1_i2	(at1g32170 : 446,0) xyloglucan endotransglycosylase-related protein (XTR4); xyloglucan endotransglucosylase/hydrolase 30 (XTH30); FUNCTIONS IN: hydrolase activity, acting on glycosyl bonds, xyloglucan:xyloglucosyl transferase activity, hydrolase activity, hydrolyzing O-glycosyl compounds; INVOLVED IN: carbohydrate metabolic process, cellular glucan metabolic process; LOCATED IN: endomembrane syst…	-1.07494
10.7	cell wall.modification	phvul.002g182000.1	Vung18665|c0_g2_i5	(at1g14720 : 457,0) member of Glycoside Hydrolase Family 16; xyloglucan endotransglucosylase/hydrolase 28 (XTH28); FUNCTIONS IN: hydrolase activity, acting on glycosyl bonds, xyloglucan:xyloglucosyl transferase activity; INVOLVED IN: fruit development, stamen filament development; LOCATED IN: endomembrane system, cell wall, apoplast; EXPRESSED IN: 22 plant structures; EXPRESSED DURING: 13 growth …	-2.32824
10.8.1	cell wall.pectin*esterases.PME	phvul.009g222100.1	Vung142615|c0_g1_i4	(q43062|pme_prupe : 698,0) Pectinesterase PPE8B precursor (EC 3,1,1,11) (Pectin methylesterase) (PE) - Prunus persica (Peach) & (at3g43270 : 661,0) Plant invertase/pectin methylesterase inhibitor superfamily; FUNCTIONS IN: enzyme inhibitor activity, pectinesterase activity; INVOLVED IN: cell wall modification; LOCATED IN: plant-type cell wall; EXPRESSED IN: 21 plant structures; EXPRESSED DURING: …	5.26221
10.8.1	cell wall.pectin*esterases.PME	phvul.009g021000.1	Vung87174|c3_g1_i1	(at1g76160 : 882,0) SKU5 similar 5 (sks5); FUNCTIONS IN: oxidoreductase activity, copper ion binding; INVOLVED IN: oxidation reduction; LOCATED IN: apoplast, cell wall, plant-type cell wall; EXPRESSED IN: 24 plant structures; EXPRESSED DURING: 13 growth stages; CONTAINS InterPro DOMAIN/s: Multicopper oxidase, type 3 (InterPro:IPR011707), Cupredoxin (InterPro:IPR008972), Multicopper oxidase, type …	4.08356
10.8.1	cell wall.pectin*esterases.PME	phvul.011g102500.1	Vung36332|c0_g1_i1	(at1g76160 : 762,0) SKU5 similar 5 (sks5); FUNCTIONS IN: oxidoreductase activity, copper ion binding; INVOLVED IN: oxidation reduction; LOCATED IN: apoplast, cell wall, plant-type cell wall; EXPRESSED IN: 24 plant structures; EXPRESSED DURING: 13 growth stages; CONTAINS InterPro DOMAIN/s: Multicopper oxidase, type 3 (InterPro:IPR011707), Cupredoxin (InterPro:IPR008972), Multicopper oxidase, type …	2.87933
10.8.1	cell wall.pectin*esterases.PME	phvul.007g218500.1	Vung58071|c1_g1_i1	(at4g02320 : 565,0) Plant invertase/pectin methylesterase inhibitor superfamily; FUNCTIONS IN: enzyme inhibitor activity, pectinesterase activity; INVOLVED IN: cell wall modification; LOCATED IN: endomembrane system, cell wall, plant-type cell wall; EXPRESSED IN: flower; CONTAINS InterPro DOMAIN/s: Pectinesterase, active site (InterPro:IPR018040), Pectin lyase fold/virulence factor (InterPro:IPR0…	4.96719
10.8.1	cell wall.pectin*esterases.PME	phvul.001g001500.1	Vung87174|c3_g2_i1	(at1g76160 : 879,0) SKU5 similar 5 (sks5); FUNCTIONS IN: oxidoreductase activity, copper ion binding; INVOLVED IN: oxidation reduction; LOCATED IN: apoplast, cell wall, plant-type cell wall; EXPRESSED IN: 24 plant structures; EXPRESSED DURING: 13 growth stages; CONTAINS InterPro DOMAIN/s: Multicopper oxidase, type 3 (InterPro:IPR011707), Cupredoxin (InterPro:IPR008972), Multicopper oxidase, type …	1.50968
10.8.1	cell wall.pectin*esterases.PME	phvul.006g088000.1	Vung119255|c0_g1_i1	(at3g05620 : 699,0) Plant invertase/pectin methylesterase inhibitor superfamily; FUNCTIONS IN: enzyme inhibitor activity, pectinesterase activity; INVOLVED IN: cell wall modification; LOCATED IN: endomembrane system, cell wall, plant-type cell wall; EXPRESSED IN: shoot, leaf apex, hypocotyl, flower, pollen tube; EXPRESSED DURING: petal differentiation and expansion stage; CONTAINS InterPro DOMAIN…	1.82518
10.8.1	cell wall.pectin*esterases.PME	phvul.002g048700.1	Vung33771|c0_g1_i2	(at1g11580 : 619,0) methylesterase PCR A (PMEPCRA); FUNCTIONS IN: enzyme inhibitor activity, pectinesterase activity; INVOLVED IN: cell wall modification; LOCATED IN: cell wall, plasma membrane, plant-type cell wall; EXPRESSED IN: 25 plant structures; EXPRESSED DURING: 13 growth stages; CONTAINS InterPro DOMAIN/s: Pectinesterase, active site (InterPro:IPR018040), Pectin lyase fold/virulence facto…	2.54487
10.8.2	cell wall.pectin*esterases.acetyl esterase	phvul.001g221400.1	Vung146467|c0_g3_i3	(gnl|cdd|39488 : 645,0) no description available & (at3g05910 : 630,0) Pectinacetylesterase family protein; FUNCTIONS IN: carboxylesterase activity; INVOLVED IN: biological_process unknown; LOCATED IN: endomembrane system; EXPRESSED IN: 22 plant structures; EXPRESSED DURING: 13 growth stages; CONTAINS InterPro DOMAIN/s: Pectinacetylesterase (InterPro:IPR004963); BEST Arabidopsis thaliana protein …	2.58212
10.8.2	cell wall.pectin*esterases.acetyl esterase	phvul.001g221400.2	Vung28477|c0_g1_i1	(gnl|cdd|39488 : 645,0) no description available & (at3g05910 : 630,0) Pectinacetylesterase family protein; FUNCTIONS IN: carboxylesterase activity; INVOLVED IN: biological_process unknown; LOCATED IN: endomembrane system; EXPRESSED IN: 22 plant structures; EXPRESSED DURING: 13 growth stages; CONTAINS InterPro DOMAIN/s: Pectinacetylesterase (InterPro:IPR004963); BEST Arabidopsis thaliana protein …	1.81396

## Sheet: Module-Proteolysis
BinCode	BinName	ID_P.vulgaris	ID_ATCs	Description	Log2FC
29.5	protein.degradation	phvul.003g203000.1	Vung89847|c3_g3_i5	(at5g50150 : 630,0) Protein of Unknown Function (DUF239); CONTAINS InterPro DOMAIN/s: Protein of unknown function DUF239, plant (InterPro:IPR004314); BEST Arabidopsis thaliana protein match is: Protein of Unknown Function (DUF239) (TAIR:AT1G23340,2); Has 1807 Blast hits to 1807 proteins in 277 species: Archae - 0; Bacteria - 0; Metazoa - 736; Fungi - 347; Plants - 385; Viruses - 0; Other Eukaryot…	1.91127
29.5	protein.degradation	phvul.003g063100.1	Vung163177|c0_g1_i2	(at1g10750 : 645,0) Protein of Unknown Function (DUF239); INVOLVED IN: N-terminal protein myristoylation; EXPRESSED IN: 13 plant structures; EXPRESSED DURING: 6 growth stages; CONTAINS InterPro DOMAIN/s: Protein of unknown function DUF239, plant (InterPro:IPR004314); BEST Arabidopsis thaliana protein match is: Protein of Unknown Function (DUF239) (TAIR:AT1G23340,2); Has 789 Blast hits to 744 prot…	4.33101
29.5	protein.degradation	phvul.009g242900.3	Vung132848|c0_g1_i11	(at4g20070 : 405,0) The gene encoding Arabidopsis thaliana Allantoate Amidohydrolase (AtAAH)which catalyzes the allantoate deiminase reaction (EC 3,5,3,9)is expressed in all parts of the plant being consistent with a function in purine turnover in Arabidopsis,; allantoate amidohydrolase (AAH); CONTAINS InterPro DOMAIN/s: Peptidase M20 (InterPro:IPR002933), ArgE/DapE/ACY1/CPG2/YscS, conserved site…	5.0754
29.5	protein.degradation	phvul.005g080600.1	Vung133102|c1_g1_i1	(p93164|ggh_soybn : 432,0) Gamma-glutamyl hydrolase precursor (EC 3,4,19,9) (Gamma-Glu-X carboxypeptidase) (Conjugase) (GH) - Glycine max (Soybean) & (gnl|cdd|36772 : 359,0) no description available & (gnl|cdd|28859 : 315,0) no description available & (at1g78660 : 311,0) The Arabidopsis protein AtGGH1 is a gamma-glutamyl hydrolase cleaving pentaglutamates to yield di- and triglutamates, The enzym…	4.73565
29.5	protein.degradation	phvul.001g101400.1	Vung54123|c0_g1_i1	(at5g04200 : 410,0) metacaspase 9 (MC9); FUNCTIONS IN: cysteine-type peptidase activity; INVOLVED IN: proteolysis; LOCATED IN: apoplast; EXPRESSED IN: 11 plant structures; EXPRESSED DURING: 4 anthesis, C globular stage, petal differentiation and expansion stage; CONTAINS InterPro DOMAIN/s: Peptidase C14, caspase catalytic (InterPro:IPR011600); BEST Arabidopsis thaliana protein match is: metacaspa…	2.47032
29.5.1	protein.degradation.subtilases	phvul.010g088700.1	Vung150834|c0_g1_i1	(at1g01900 : 792,0) Encodes AtSBT1,1, a subtilisin-like serine protease, Cleaves the phytosulfokine AtPSK4, a growth promoting peptide,; SBTI1,1; FUNCTIONS IN: serine-type endopeptidase activity; INVOLVED IN: proteolysis, negative regulation of catalytic activity; LOCATED IN: extracellular matrix, apoplast, cell wall; EXPRESSED IN: 19 plant structures; EXPRESSED DURING: 11 growth stages; CONTAINS…	3.86807
29.5.1	protein.degradation.subtilases	phvul.003g237300.1	Vung80802|c0_g1_i1	(at5g67360 : 1000,0) Encodes a subtilisin-like serine protease essential for mucilage release from seed coats,; ARA12; FUNCTIONS IN: serine-type endopeptidase activity; INVOLVED IN: proteolysis, seed coat development, mucilage metabolic process involved seed coat development, mucilage extrusion from seed coat; LOCATED IN: extracellular region, apoplast, cell wall, plant-type cell wall; EXPRESSED …	1.13917
29.5.1	protein.degradation.subtilases	phvul.003g050900.1	Vung57030|c1_g2_i1	(at2g04160 : 892,0) isolated from differential screening of a cDNA library from auxin-treated root culture, encodes a protein similar to subtilisin-like serine protease which is believed to be active outside the plant cell,; AUXIN-INDUCED IN ROOT CULTURES 3 (AIR3); FUNCTIONS IN: serine-type endopeptidase activity; INVOLVED IN: proteolysis, response to auxin stimulus, lateral root morphogenesis; L…	-3.89803
29.5.1	protein.degradation.subtilases	phvul.009g226900.1	Vung122576|c0_g1_i3	(at2g05920 : 988,0) Subtilase family protein; FUNCTIONS IN: identical protein binding, serine-type endopeptidase activity; INVOLVED IN: proteolysis, negative regulation of catalytic activity; LOCATED IN: cell wall, plant-type cell wall; EXPRESSED IN: 22 plant structures; EXPRESSED DURING: 13 growth stages; CONTAINS InterPro DOMAIN/s: Protease-associated PA (InterPro:IPR003137), Proteinase inhibit…	1.78898
29.5.1	protein.degradation.subtilases	phvul.008g213300.1	Vung44038|c4_g1_i3	(at2g04160 : 642,0) isolated from differential screening of a cDNA library from auxin-treated root culture, encodes a protein similar to subtilisin-like serine protease which is believed to be active outside the plant cell,; AUXIN-INDUCED IN ROOT CULTURES 3 (AIR3); FUNCTIONS IN: serine-type endopeptidase activity; INVOLVED IN: proteolysis, response to auxin stimulus, lateral root morphogenesis; L…	2.81536
29.5.1	protein.degradation.subtilases	phvul.008g013300.2	Vung165609|c0_g1_i1	(at1g01900 : 785,0) Encodes AtSBT1,1, a subtilisin-like serine protease, Cleaves the phytosulfokine AtPSK4, a growth promoting peptide,; SBTI1,1; FUNCTIONS IN: serine-type endopeptidase activity; INVOLVED IN: proteolysis, negative regulation of catalytic activity; LOCATED IN: extracellular matrix, apoplast, cell wall; EXPRESSED IN: 19 plant structures; EXPRESSED DURING: 11 growth stages; CONTAINS…	4.4705
29.5.1	protein.degradation.subtilases	phvul.008g013300.1	Vung134737|c1_g1_i1	(at1g01900 : 785,0) Encodes AtSBT1,1, a subtilisin-like serine protease, Cleaves the phytosulfokine AtPSK4, a growth promoting peptide,; SBTI1,1; FUNCTIONS IN: serine-type endopeptidase activity; INVOLVED IN: proteolysis, negative regulation of catalytic activity; LOCATED IN: extracellular matrix, apoplast, cell wall; EXPRESSED IN: 19 plant structures; EXPRESSED DURING: 11 growth stages; CONTAINS…	3.95839
29.5.1	protein.degradation.subtilases	phvul.001g238100.1	Vung19573|c2_g2_i7	(at5g59090 : 555,0) subtilase 4,12 (SBT4,12); FUNCTIONS IN: identical protein binding, serine-type endopeptidase activity; INVOLVED IN: proteolysis, negative regulation of catalytic activity; LOCATED IN: apoplast, nucleus, cytoplasm; EXPRESSED IN: 6 plant structures; CONTAINS InterPro DOMAIN/s: Protease-associated PA (InterPro:IPR003137), Peptidase S8/S53, subtilisin/kexin/sedolisin (InterPro:IPR…	-3.14871
29.5.3	protein.degradation.cysteine protease	phvul.009g008200.1	Vung46971|c0_g1_i1	(at4g35350 : 530,0) tracheary element vacuolar protein; xylem cysteine peptidase 1 (XCP1); FUNCTIONS IN: cysteine-type peptidase activity, cysteine-type endopeptidase activity; INVOLVED IN: proteolysis, developmental programmed cell death; LOCATED IN: plant-type vacuole; EXPRESSED IN: 20 plant structures; EXPRESSED DURING: 10 growth stages; CONTAINS InterPro DOMAIN/s: Peptidase C1A, papain (Inter…	5.69034
29.5.3	protein.degradation.cysteine protease	phvul.009g008100.1	Vung46971|c0_g2_i1	(at1g20850 : 518,0) xylem cysteine peptidase 2 (XCP2); FUNCTIONS IN: cysteine-type peptidase activity, peptidase activity; INVOLVED IN: proteolysis, developmental programmed cell death; LOCATED IN: cell wall; EXPRESSED IN: 23 plant structures; EXPRESSED DURING: 13 growth stages; CONTAINS InterPro DOMAIN/s: Peptidase C1A, papain (InterPro:IPR013128), Proteinase inhibitor I29, cathepsin propeptide …	3.94237
29.5.3	protein.degradation.cysteine protease	phvul.002g239300.1	Vung42040|c0_g1_i4	(p22895|p34_soybn : 301,0) P34 probable thiol protease precursor (EC 3,4,22,-) - Glycine max (Soybean) & (at5g43060 : 261,0) Granulin repeat cysteine protease family protein; FUNCTIONS IN: cysteine-type peptidase activity, cysteine-type endopeptidase activity; INVOLVED IN: response to salt stress; LOCATED IN: vacuole; EXPRESSED IN: 24 plant structures; EXPRESSED DURING: 15 growth stages; CONTAINS…	8.33977
29.5.4	protein.degradation.aspartate protease	phvul.010g114700.1	Vung143902|c0_g1_i1	(at1g01300 : 566,0) Eukaryotic aspartyl protease family protein; FUNCTIONS IN: aspartic-type endopeptidase activity; INVOLVED IN: proteolysis, response to karrikin; LOCATED IN: membrane, plant-type cell wall; EXPRESSED IN: 22 plant structures; EXPRESSED DURING: 13 growth stages; CONTAINS InterPro DOMAIN/s: Peptidase aspartic (InterPro:IPR021109), Peptidase aspartic, catalytic (InterPro:IPR009007)…	1.623
29.5.4	protein.degradation.aspartate protease	phvul.003g125000.2	Vung30613|c3_g2_i4	(p42211|asprx_orysa : 543,0) Aspartic proteinase precursor (EC 3,4,23,-) - Oryza sativa (Rice) & (at1g11910 : 542,0) Encodes an aspartic proteinase that forms a heterodimer and is stable over a broad pH range (ph 3-8),; aspartic proteinase A1 (APA1); FUNCTIONS IN: endopeptidase activity; INVOLVED IN: proteolysis, response to salt stress; LOCATED IN: vacuole; EXPRESSED IN: 25 plant structures; EXP…	7.35612
29.5.4	protein.degradation.aspartate protease	phvul.003g028600.1	Vung83505|c0_g2_i1	(at1g25510 : 556,0) Eukaryotic aspartyl protease family protein; FUNCTIONS IN: aspartic-type endopeptidase activity; INVOLVED IN: proteolysis; LOCATED IN: endomembrane system; EXPRESSED IN: 13 plant structures; EXPRESSED DURING: 6 growth stages; CONTAINS InterPro DOMAIN/s: Peptidase aspartic (InterPro:IPR021109), Peptidase aspartic, catalytic (InterPro:IPR009007), Peptidase A1 (InterPro:IPR001461…	2.01386
29.5.4	protein.degradation.aspartate protease	phvul.008g253400.1	Vung39696|c0_g2_i2	(at1g79720 : 488,0) Eukaryotic aspartyl protease family protein; FUNCTIONS IN: aspartic-type endopeptidase activity; INVOLVED IN: proteolysis; LOCATED IN: apoplast; EXPRESSED IN: 22 plant structures; EXPRESSED DURING: 13 growth stages; CONTAINS InterPro DOMAIN/s: Peptidase aspartic (InterPro:IPR021109), Peptidase aspartic, catalytic (InterPro:IPR009007), Peptidase A1 (InterPro:IPR001461), Peptida…	3.07379
29.5.4	protein.degradation.aspartate protease	phvul.007g109000.1	Vung85627|c0_g1_i1	(at1g03220 : 349,0) Eukaryotic aspartyl protease family protein; FUNCTIONS IN: aspartic-type endopeptidase activity; INVOLVED IN: response to salt stress; LOCATED IN: cell wall, plasma membrane, membrane, plant-type cell wall; EXPRESSED IN: 6 plant structures; CONTAINS InterPro DOMAIN/s: Peptidase aspartic (InterPro:IPR021109), Peptidase aspartic, catalytic (InterPro:IPR009007), Peptidase A1 (Int…	2.0642
29.5.4	protein.degradation.aspartate protease	phvul.001g149500.1	Vung84157|c2_g1_i1	(at1g03220 : 285,0) Eukaryotic aspartyl protease family protein; FUNCTIONS IN: aspartic-type endopeptidase activity; INVOLVED IN: response to salt stress; LOCATED IN: cell wall, plasma membrane, membrane, plant-type cell wall; EXPRESSED IN: 6 plant structures; CONTAINS InterPro DOMAIN/s: Peptidase aspartic (InterPro:IPR021109), Peptidase aspartic, catalytic (InterPro:IPR009007), Peptidase A1 (Int…	-1.36981
29.5.4	protein.degradation.aspartate protease	phvul.006g153100.1	Vung25920|c1_g1_i2	(at1g03230 : 238,0) Eukaryotic aspartyl protease family protein; FUNCTIONS IN: aspartic-type endopeptidase activity; INVOLVED IN: response to salt stress; LOCATED IN: cell wall, plant-type cell wall; EXPRESSED IN: stem, root; CONTAINS InterPro DOMAIN/s: Peptidase aspartic (InterPro:IPR021109), Peptidase aspartic, catalytic (InterPro:IPR009007), Peptidase A1 (InterPro:IPR001461); BEST Arabidopsis …	5.94459
29.5.5	protein.degradation.serine protease	phvul.003g260000.1	Vung150764|c0_g2_i2	(at4g36195 : 608,0) Serine carboxypeptidase S28 family protein; FUNCTIONS IN: serine-type peptidase activity; INVOLVED IN: proteolysis; EXPRESSED IN: guard cell; CONTAINS InterPro DOMAIN/s: Peptidase S28 (InterPro:IPR008758); BEST Arabidopsis thaliana protein match is: Serine carboxypeptidase S28 family protein (TAIR:AT4G36190,1), & (gnl|cdd|37393 : 347,0) no description available & (gnl|cdd|8689…	4.69142
29.5.5	protein.degradation.serine protease	phvul.005g131000.1	Vung134846|c0_g1_i2	(at3g45010 : 677,0) serine carboxypeptidase-like 48 (scpl48); FUNCTIONS IN: serine-type carboxypeptidase activity; INVOLVED IN: proteolysis; LOCATED IN: endomembrane system; EXPRESSED IN: 24 plant structures; EXPRESSED DURING: 13 growth stages; CONTAINS InterPro DOMAIN/s: Peptidase S10, serine carboxypeptidase (InterPro:IPR001563), Peptidase S10, serine carboxypeptidase, active site (InterPro:IPR…	3.03859
29.5.5	protein.degradation.serine protease	phvul.007g093300.1	Vung61361|c1_g1_i4	(at3g07990 : 724,0) serine carboxypeptidase-like 27 (SCPL27); FUNCTIONS IN: serine-type carboxypeptidase activity; INVOLVED IN: proteolysis; LOCATED IN: endomembrane system; EXPRESSED IN: 21 plant structures; EXPRESSED DURING: 13 growth stages; CONTAINS InterPro DOMAIN/s: Peptidase S10, serine carboxypeptidase (InterPro:IPR001563), Peptidase S10, serine carboxypeptidase, active site (InterPro:IPR…	2.09454
29.5.7	protein.degradation.metalloprotease	phvul.011g162000.1	Vung55551|c2_g1_i1	(at1g07510 : 1085,0) encodes an FtsH protease that is localized to the mitochondrion; FTSH protease 10 (ftsh10); FUNCTIONS IN: in 6 functions; INVOLVED IN: proteolysis, protein catabolic process; LOCATED IN: mitochondrion, chloroplast thylakoid membrane, plastid; EXPRESSED IN: 25 plant structures; EXPRESSED DURING: 15 growth stages; CONTAINS InterPro DOMAIN/s: Peptidase M41, FtsH (InterPro:IPR005…	-3.64711
29.5.7	protein.degradation.metalloprotease	phvul.007g202700.1	Vung30164|c2_g1_i1	(at1g09300 : 600,0) Metallopeptidase M24 family protein; FUNCTIONS IN: metallopeptidase activity, manganese ion binding, metalloexopeptidase activity, aminopeptidase activity; INVOLVED IN: proteolysis, cellular process; EXPRESSED IN: 18 plant structures; EXPRESSED DURING: 10 growth stages; CONTAINS InterPro DOMAIN/s: Peptidase M24B, X-Pro dipeptidase/aminopeptidase P N-terminal (InterPro:IPR00786…	-5.34495
29.5.7	protein.degradation.metalloprotease	phvul.002g076700.1	Vung138864|c0_g1_i1	(at1g70170 : 144,0) mutant has Late flowering; Early senescence; Matrix Metalloproteinase; matrix metalloproteinase (MMP); FUNCTIONS IN: metallopeptidase activity, metalloendopeptidase activity, zinc ion binding; INVOLVED IN: proteolysis, metabolic process; LOCATED IN: anchored to membrane; EXPRESSED IN: 7 plant structures; EXPRESSED DURING: L mature pollen stage, M germinated pollen stage, 4 ant…	1.97875
29.5.9	protein.degradation.AAA type	phvul.011g162000.1	Vung55551|c2_g1_i1	(at1g07510 : 1085,0) encodes an FtsH protease that is localized to the mitochondrion; FTSH protease 10 (ftsh10); FUNCTIONS IN: in 6 functions; INVOLVED IN: proteolysis, protein catabolic process; LOCATED IN: mitochondrion, chloroplast thylakoid membrane, plastid; EXPRESSED IN: 25 plant structures; EXPRESSED DURING: 15 growth stages; CONTAINS InterPro DOMAIN/s: Peptidase M41, FtsH (InterPro:IPR005…	-3.64711
29.5.9	protein.degradation.AAA type	phvul.004g024800.1	Vung8032|c1_g1_i3	(gnl|cdd|35962 : 517,0) no description available & (at3g28580 : 498,0) P-loop containing nucleoside triphosphate hydrolases superfamily protein; FUNCTIONS IN: nucleoside-triphosphatase activity, ATPase activity, nucleotide binding, ATP binding; INVOLVED IN: response to abscisic acid stimulus; LOCATED IN: endoplasmic reticulum; EXPRESSED IN: 10 plant structures; EXPRESSED DURING: LP,04 four leaves…	1.1654
29.5.9	protein.degradation.AAA type	phvul.004g024700.1	Vung8032|c1_g2_i3	(gnl|cdd|35962 : 559,0) no description available & (at5g40010 : 555,0) AAA-ATPase 1 (AATP1); FUNCTIONS IN: nucleoside-triphosphatase activity, ATPase activity, nucleotide binding, ATP binding; EXPRESSED IN: stem, inflorescence meristem, root, flower, stamen; EXPRESSED DURING: 4 anthesis, petal differentiation and expansion stage; CONTAINS InterPro DOMAIN/s: ATPase, AAA-type, core (InterPro:IPR003…	2.09822
29.5.9	protein.degradation.AAA type	phvul.004g024900.1	Vung8032|c1_g1_i1	(at5g40010 : 553,0) AAA-ATPase 1 (AATP1); FUNCTIONS IN: nucleoside-triphosphatase activity, ATPase activity, nucleotide binding, ATP binding; EXPRESSED IN: stem, inflorescence meristem, root, flower, stamen; EXPRESSED DURING: 4 anthesis, petal differentiation and expansion stage; CONTAINS InterPro DOMAIN/s: ATPase, AAA-type, core (InterPro:IPR003959), ATPase, AAA+ type, core (InterPro:IPR003593),…	1.63877
29.5.9	protein.degradation.AAA type	phvul.001g204400.1	Vung72428|c0_g1_i13	(at1g03000 : 1023,0) Encodes an apparent ATPase similar to yeast and human protein required for peroxisomal biogenesis, May facilitate recycling of PEX5, the peroxisomal matrix protein receptor, and thereby promote peroxisomal matrix protein import,; peroxin 6 (PEX6); FUNCTIONS IN: nucleoside-triphosphatase activity, ATPase activity, nucleotide binding, ATP binding; INVOLVED IN: protein import in…	2.10077
29.5.11.3	protein.degradation.ubiquitin.E2	phvul.011g160100.2	Vung72777|c0_g1_i6	(at1g78870 : 285,0) UBC35/UBC13A encodes a protein that may play a role in DNA damage responses and error-free post-replicative DNA repair by participating in lysine-63-based polyubiquitination reactions, UBC35/UBC13A can form diubiquitin and triubiquitin chains in combination with MMZ1,2,3,4/(UEV1A,B,C,D) in vitro, It can also functionally complement an mms2 ubc13 mutation in budding yeast by in…	-6.95544
29.5.11.4.2	protein.degradation.ubiquitin.E3.RING	phvul.003g177000.1	Vung133892|c1_g1_i3	(at1g73950 : 662,0) Transmembrane Fragile-X-F-associated protein; FUNCTIONS IN: zinc ion binding; INVOLVED IN: biological_process unknown; LOCATED IN: vacuole; EXPRESSED IN: 21 plant structures; EXPRESSED DURING: 11 growth stages; CONTAINS InterPro DOMAIN/s: Transmembrane Fragile-X-F-associated protein (InterPro:IPR019396), Zinc finger, RING-type (InterPro:IPR001841); BEST Arabidopsis thaliana pr…	-2.06417
29.5.11.4.2	protein.degradation.ubiquitin.E3.RING	phvul.003g254600.1	Vung43553|c1_g1_i3	(at4g36550 : 364,0) ARM repeat superfamily protein; FUNCTIONS IN: ubiquitin-protein ligase activity, binding; INVOLVED IN: protein ubiquitination; LOCATED IN: ubiquitin ligase complex; EXPRESSED IN: 22 plant structures; EXPRESSED DURING: 13 growth stages; CONTAINS InterPro DOMAIN/s: U box domain (InterPro:IPR003613), Armadillo-like helical (InterPro:IPR011989), Armadillo-type fold (InterPro:IPR01…	-6.13513
29.5.11.4.2	protein.degradation.ubiquitin.E3.RING	phvul.003g284600.1	Vung23582|c0_g1_i1	(at4g17905 : 189,0) Putative RING-H2 finger protein ATL4H,; ATL4H; FUNCTIONS IN: zinc ion binding; EXPRESSED IN: 16 plant structures; EXPRESSED DURING: 11 growth stages; CONTAINS InterPro DOMAIN/s: Zinc finger, RING-type (InterPro:IPR001841), Zinc finger, C3HC4 RING-type (InterPro:IPR018957); BEST Arabidopsis thaliana protein match is: RING/U-box superfamily protein (TAIR:AT3G03550,1); Has 30201 …	2.92704
29.5.11.4.2	protein.degradation.ubiquitin.E3.RING	phvul.009g179700.1	Vung41050|c0_g2_i1	(at1g23980 : 80,1) RING/U-box superfamily protein; FUNCTIONS IN: zinc ion binding; EXPRESSED IN: 21 plant structures; EXPRESSED DURING: 13 growth stages; CONTAINS InterPro DOMAIN/s: Zinc finger, RING-type (InterPro:IPR001841), Zinc finger, C3HC4 RING-type (InterPro:IPR018957); BEST Arabidopsis thaliana protein match is: RING/U-box superfamily protein (TAIR:AT5G40250,1); Has 9283 Blast hits to 926…	-1.52965
29.5.11.4.2	protein.degradation.ubiquitin.E3.RING	phvul.009g244700.1	Vung62914|c0_g1_i2	(at1g30860 : 150,0) RING/U-box superfamily protein; FUNCTIONS IN: zinc ion binding; EXPRESSED IN: stem, stamen, pollen tube; EXPRESSED DURING: 4 anthesis; CONTAINS InterPro DOMAIN/s: Zinc finger, RING-type (InterPro:IPR001841); BEST Arabidopsis thaliana protein match is: RING/U-box superfamily protein (TAIR:AT2G34920,1); Has 4912 Blast hits to 4241 proteins in 362 species: Archae - 9; Bacteria - …	1.33355
29.5.11.4.2	protein.degradation.ubiquitin.E3.RING	phvul.011g174600.1	Vung134708|c0_g1_i3	(at3g12920 : 192,0) SBP (S-ribonuclease binding protein) family protein; FUNCTIONS IN: zinc ion binding; INVOLVED IN: biological_process unknown; LOCATED IN: nucleus; EXPRESSED IN: 24 plant structures; EXPRESSED DURING: 13 growth stages; CONTAINS InterPro DOMAIN/s: Zinc finger, RING-type (InterPro:IPR001841), S-ribonuclease binding protein, SBP1, pollen (InterPro:IPR017066); BEST Arabidopsis thal…	1.47671
29.5.11.4.2	protein.degradation.ubiquitin.E3.RING	phvul.008g177800.1	Vung50622|c0_g1_i1	(at1g72200 : 208,0) RING/U-box superfamily protein; FUNCTIONS IN: zinc ion binding; EXPRESSED IN: 13 plant structures; EXPRESSED DURING: LP,04 four leaves visible, 4 anthesis, petal differentiation and expansion stage, LP,08 eight leaves visible; CONTAINS InterPro DOMAIN/s: Zinc finger, RING-type (InterPro:IPR001841), Zinc finger, C3HC4 RING-type (InterPro:IPR018957); BEST Arabidopsis thaliana pr…	3.76223
29.5.11.4.2	protein.degradation.ubiquitin.E3.RING	phvul.008g275400.1	Vung141342|c0_g1_i1	(at5g54630 : 110,0) zinc finger protein-related; FUNCTIONS IN: sequence-specific DNA binding transcription factor activity; INVOLVED IN: regulation of transcription; LOCATED IN: intracellular; EXPRESSED IN: 21 plant structures; EXPRESSED DURING: 13 growth stages; CONTAINS InterPro DOMAIN/s: Zinc finger, C2H2-like (InterPro:IPR015880), Zinc finger, C2H2-type (InterPro:IPR007087); BEST Arabidopsis …	4.24104
29.5.11.4.2	protein.degradation.ubiquitin.E3.RING	phvul.004g061800.1	Vung93621|c0_g1_i2	(at5g14420 : 553,0) RING domain ligase2 (RGLG2); CONTAINS InterPro DOMAIN/s: Zinc finger, RING-type (InterPro:IPR001841), Copine (InterPro:IPR010734), von Willebrand factor, type A (InterPro:IPR002035); BEST Arabidopsis thaliana protein match is: RING domain ligase1 (TAIR:AT3G01650,1); Has 35333 Blast hits to 34131 proteins in 2444 species: Archae - 798; Bacteria - 22429; Metazoa - 974; Fungi - 9…	4.48658
29.5.11.4.2	protein.degradation.ubiquitin.E3.RING	phvul.007g181800.1	Vung14248|c0_g2_i1	(at3g05200 : 231,0) Encodes a putative RING-H2 zinc finger protein ATL6 (ATL6),; ATL6; FUNCTIONS IN: zinc ion binding; INVOLVED IN: response to chitin; LOCATED IN: plasma membrane; EXPRESSED IN: 22 plant structures; EXPRESSED DURING: 12 growth stages; CONTAINS InterPro DOMAIN/s: Zinc finger, RING-type (InterPro:IPR001841), Zinc finger, C3HC4 RING-type (InterPro:IPR018957); BEST Arabidopsis thalia…	1.09422
29.5.11.4.2	protein.degradation.ubiquitin.E3.RING	phvul.006g146500.1	Vung147076|c0_g1_i1	(at1g11950 : 792,0) Transcription factor jumonji (jmjC) domain-containing protein; CONTAINS InterPro DOMAIN/s: Transcription factor jumonji/aspartyl beta-hydroxylase (InterPro:IPR003347), Transcription factor jumonji (InterPro:IPR013129); BEST Arabidopsis thaliana protein match is: transcription factor jumonji (jmjC) domain-containing protein (TAIR:AT1G62310,1); Has 30201 Blast hits to 17322 prot…	3.92177
29.5.11.4.3.2	protein.degradation.ubiquitin.E3.SCF.FBOX	phvul.009g032400.1	Vung40300|c1_g1_i3	(at1g78280 : 1207,0) transferases, transferring glycosyl groups; CONTAINS InterPro DOMAIN/s: Transcription factor jumonji/aspartyl beta-hydroxylase (InterPro:IPR003347), F-box domain, cyclin-like (InterPro:IPR001810), F-box domain, Skp2-like (InterPro:IPR022364), Transcription factor jumonji (InterPro:IPR013129), Aminoglycoside phosphotransferase (InterPro:IPR002575), Protein kinase-like domain (…	5.14448
29.5.11.4.3.2	protein.degradation.ubiquitin.E3.SCF.FBOX	phvul.009g133200.1	Vung152642|c0_g1_i1	(at1g21410 : 474,0) AtSKP2;1 is a homolog of human SKP2, the human F-box protein that recruits E2F1, Contains an F-box motif at the N-terminal region and a C-terminal Leu-rich repeat domain, Forms part of an E3-ubiquitin-ligase SCF (Skp1, cullin, F-box) complex and recruits phosphorylated AtE2Fc, a transcriptional factor that might play a role in cell division and during the transition from skoto…	-1.09934
29.5.11.4.3.2	protein.degradation.ubiquitin.E3.SCF.FBOX	phvul.007g116000.1	Vung160746|c3_g2_i3	(at2g02360 : 234,0) phloem protein 2-B10 (PP2-B10); CONTAINS InterPro DOMAIN/s: F-box domain, cyclin-like (InterPro:IPR001810), F-box domain, Skp2-like (InterPro:IPR022364); BEST Arabidopsis thaliana protein match is: F-box family protein (TAIR:AT2G02240,1); Has 572 Blast hits to 558 proteins in 38 species: Archae - 0; Bacteria - 0; Metazoa - 5; Fungi - 0; Plants - 567; Viruses - 0; Other Eukaryo…	4.34288
29.5.11.4.3.2	protein.degradation.ubiquitin.E3.SCF.FBOX	phvul.001g156800.1	Vung164187|c0_g1_i3	(at3g54650 : 497,0) FBL17; FUNCTIONS IN: ubiquitin-protein ligase activity; INVOLVED IN: generative cell mitosis, seed development, embryo development, ubiquitin-dependent protein catabolic process, pollen development; LOCATED IN: chloroplast; EXPRESSED IN: 21 plant structures; EXPRESSED DURING: 12 growth stages; CONTAINS InterPro DOMAIN/s: F-box domain, cyclin-like (InterPro:IPR001810); Has 1738…	1.99766
29.5.11.4.3.2	protein.degradation.ubiquitin.E3.SCF.FBOX	phvul.002g235700.1	Vung121243|c0_g1_i1	(at2g44130 : 202,0) Galactose oxidase/kelch repeat superfamily protein; CONTAINS InterPro DOMAIN/s: F-box domain, cyclin-like (InterPro:IPR001810), Galactose oxidase/kelch, beta-propeller (InterPro:IPR011043), Kelch repeat type 1 (InterPro:IPR006652), Kelch related (InterPro:IPR013089), Kelch-type beta propeller (InterPro:IPR015915); BEST Arabidopsis thaliana protein match is: Galactose oxidase/k…	-1.47836
29.5.11.4.3.2	protein.degradation.ubiquitin.E3.SCF.FBOX	phvul.002g222100.1	Vung128261|c1_g1_i3	(at1g61340 : 87,0) F-box family protein; FUNCTIONS IN: molecular_function unknown; INVOLVED IN: biological_process unknown; EXPRESSED IN: 16 plant structures; EXPRESSED DURING: 10 growth stages; BEST Arabidopsis thaliana protein match is: F-box family protein (TAIR:AT4G21510,1), & (reliability: 171,0) & (original description: pacid=27168320 transcript=Phvul,002G222100,1 locus=Phvul,002G222100 ID=…	1.12202
29.5.11.4.3.2	protein.degradation.ubiquitin.E3.SCF.FBOX	phvul.002g174600.1	Vung135201|c0_g1_i6	(at1g67480 : 487,0) Galactose oxidase/kelch repeat superfamily protein; FUNCTIONS IN: molecular_function unknown; INVOLVED IN: biological_process unknown; LOCATED IN: cellular_component unknown; EXPRESSED IN: 23 plant structures; EXPRESSED DURING: 15 growth stages; CONTAINS InterPro DOMAIN/s: F-box domain, cyclin-like (InterPro:IPR001810), Galactose oxidase/kelch, beta-propeller (InterPro:IPR0110…	-2.61279
29.5.11.4.99	protein.degradation.ubiquitin.E3.unspecified	phvul.005g137900.1	Vung147950|c0_g1_i3	(at3g45620 : 586,0) This gene is predicted to encode a protein with a DWD motif, It can bind to DDB1a in Y2H assays, and DDB1b in co-IP assays, and may be involved in the formation of a CUL4-based E3 ubiquitin ligase; Transducin/WD40 repeat-like superfamily protein; FUNCTIONS IN: protein binding, nucleotide binding; INVOLVED IN: biological_process unknown; LOCATED IN: CUL4 RING ubiquitin ligase c…	5.02598
29.5.11.5	protein.degradation.ubiquitin.ubiquitin protease	phvul.005g052400.1	Vung80653|c3_g1_i3	(at3g14400 : 598,0) Encodes a ubiquitin-specific protease,; ubiquitin-specific protease 25 (UBP25); FUNCTIONS IN: ubiquitin-specific protease activity, ubiquitin thiolesterase activity; INVOLVED IN: ubiquitin-dependent protein catabolic process; EXPRESSED IN: 24 plant structures; EXPRESSED DURING: 15 growth stages; CONTAINS InterPro DOMAIN/s: Peptidase C19, ubiquitin carboxyl-terminal hydrolase 2…	6.70439
29.5.11.20	protein.degradation.ubiquitin.proteasom	phvul.006g080300.1	Vung104403|c0_g1_i8	(at5g58290 : 736,0) 26S proteasome AAA-ATPase subunit RPT3 (RPT3) mRNA,; regulatory particle triple-A ATPase 3 (RPT3); FUNCTIONS IN: ATPase activity; INVOLVED IN: ubiquitin-dependent protein catabolic process; LOCATED IN: proteasome regulatory particle, base subcomplex, proteasome complex, cell wall, nucleus, membrane; EXPRESSED IN: 24 plant structures; EXPRESSED DURING: 16 growth stages; CONTAIN…	6.72507

## Sheet: Module-SecondaryMetabolism
BinCode	BinName	ID_P.vulgaris	ID_CTS	Description	Log2FC
16.1	secondary metabolism.isoprenoids	phvul.006g156900.1	Vung76278|c1_g7_i3	(gnl|cdd|35718 : 1151,0) no description available & (at1g78950 : 1029,0) Terpenoid cyclases family protein; CONTAINS InterPro DOMAIN/s: Terpene synthase, conserved site (InterPro:IPR002365), Squalene cyclase (InterPro:IPR018333), Terpenoid cylases/protein prenyltransferase alpha-alpha toroid (InterPro:IPR008930), Prenyltransferase/squalene oxidase (InterPro:IPR001330); BEST Arabidopsis thaliana p…	-2.65513
16.1	secondary metabolism.isoprenoids	phvul.006g156000.1	Vung76278|c1_g3_i2	(gnl|cdd|35718 : 1156,0) no description available & (at1g78950 : 1036,0) Terpenoid cyclases family protein; CONTAINS InterPro DOMAIN/s: Terpene synthase, conserved site (InterPro:IPR002365), Squalene cyclase (InterPro:IPR018333), Terpenoid cylases/protein prenyltransferase alpha-alpha toroid (InterPro:IPR008930), Prenyltransferase/squalene oxidase (InterPro:IPR001330); BEST Arabidopsis thaliana p…	-3.76411
16.1.1.1	secondary metabolism.isoprenoids.non-mevalonate pathway.DXS	phvul.003g148900.1	Vung137421|c5_g3_i5	(at4g15560 : 904,0) Encodes a protein with 1-deoxyxylulose 5-phosphate synthase activity involved in the MEP pathway, It is essential for chloroplast development in Arabidopsis; CLOROPLASTOS ALTERADOS 1 (CLA1); FUNCTIONS IN: 1-deoxy-D-xylulose-5-phosphate synthase activity; INVOLVED IN: chlorophyll biosynthetic process, response to light stimulus, isopentenyl diphosphate biosynthetic process, mev…	7.08811
16.1.1.10	secondary metabolism.isoprenoids.non-mevalonate pathway.geranylgeranyl pyrophosphate synthase	phvul.002g026400.1	Vung158281|c0_g1_i1	(q94id7|ggpps_hevbr : 451,0) Geranylgeranyl pyrophosphate synthetase, chloroplast precursor (GGPP synthetase) [Includes: Dimethylallyltranstransferase (EC 2,5,1,1); Geranyltranstransferase (EC 2,5,1,10); Farnesyltranstransferase (EC 2,5,1,29)] - Hevea brasiliensis & (at4g36810 : 441,0) Encodes a protein with geranylgeranyl pyrophosphate synthase activity involved in isoprenoid biosynthesis, The e…	4.59687
16.1.2.1	secondary metabolism.isoprenoids.mevalonate pathway.acetyl-CoA C-acyltransferase	phvul.008g288400.1	Vung89724|c1_g3_i7	(at5g48230 : 606,0) acetoacetyl-CoA thiolase 2 (ACAT2); FUNCTIONS IN: transferase activity, transferring acyl groups other than amino-acyl groups, acetyl-CoA C-acetyltransferase activity, catalytic activity; INVOLVED IN: embryo development ending in seed dormancy; LOCATED IN: peroxisome, plasma membrane; EXPRESSED IN: 24 plant structures; EXPRESSED DURING: 13 growth stages; CONTAINS InterPro DOMA…	3.22903
16.1.2.3	secondary metabolism.isoprenoids.mevalonate pathway.HMG-CoA reductase	phvul.003g271800.1	Vung100378|c1_g1_i2	(q00583|hmdh3_hevbr : 788,0) 3-hydroxy-3-methylglutaryl-coenzyme A reductase 3 (EC 1,1,1,34) (HMG-CoA reductase 3) - Hevea brasiliensis (Para rubber tree) & (at1g76490 : 755,0) Encodes a 3-hydroxy-3-methylglutaryl coenzyme A reductase, which is involved in melavonate biosynthesis and performs the first committed step in isoprenoid biosynthesis, Expression is activated in dark in leaf tissue but n…	2.23026
16.1.2.3	secondary metabolism.isoprenoids.mevalonate pathway.HMG-CoA reductase	phvul.008g208900.1	Vung119995|c0_g1_i4	(p29057|hmdh1_hevbr : 812,0) 3-hydroxy-3-methylglutaryl-coenzyme A reductase 1 (EC 1,1,1,34) (HMG-CoA reductase 1) - Hevea brasiliensis (Para rubber tree) & (at1g76490 : 797,0) Encodes a 3-hydroxy-3-methylglutaryl coenzyme A reductase, which is involved in melavonate biosynthesis and performs the first committed step in isoprenoid biosynthesis, Expression is activated in dark in leaf tissue but n…	-5.2143
16.1.2.3	secondary metabolism.isoprenoids.mevalonate pathway.HMG-CoA reductase	phvul.002g118900.1	Vung9874|c6_g1_i5	(p29057|hmdh1_hevbr : 766,0) 3-hydroxy-3-methylglutaryl-coenzyme A reductase 1 (EC 1,1,1,34) (HMG-CoA reductase 1) - Hevea brasiliensis (Para rubber tree) & (at1g76490 : 750,0) Encodes a 3-hydroxy-3-methylglutaryl coenzyme A reductase, which is involved in melavonate biosynthesis and performs the first committed step in isoprenoid biosynthesis, Expression is activated in dark in leaf tissue but n…	2.05002
16.1.2.9	secondary metabolism.isoprenoids.mevalonate pathway.farnesyl pyrophosphate synthetase	phvul.006g136300.1	Vung129348|c0_g1_i11	(o64905|fpps_helan : 593,0) Farnesyl pyrophosphate synthetase (FPP synthetase) (FPS) (Farnesyl diphosphate synthetase) [Includes: Dimethylallyltranstransferase (EC 2,5,1,1); Geranyltranstransferase (EC 2,5,1,10)] - Helianthus annuus (Common sunflower) & (at5g47770 : 580,0) Encodes a protein with farnesyl diphosphate synthase activity,; farnesyl diphosphate synthase 1 (FPS1); FUNCTIONS IN: dimethy…	1.67693
16.1.5	secondary metabolism.isoprenoids.terpenoids	phvul.005g111400.1	Vung52442|c1_g4_i1	(gnl|cdd|29478 : 514,0) no description available & (at4g16730 : 350,0) In the Col ecotype, no functional protein is encoded at this locus due to the presence of a two-base (AT) insertion 184 nucleotides downstream of the start codon leading to a frame shift and premature translational termination, However, in the Ws ecotype, a functional terpene synthase that localizes to the chloroplast is encod…	1.13895
16.1.5	secondary metabolism.isoprenoids.terpenoids	phvul.011g143500.1	Vung105243|c2_g1_i11	(gnl|cdd|29478 : 567,0) no description available & (p93665|dcs1_goshi : 456,0) (+)-delta-cadinene synthase (EC 4,2,3,13) (D-cadinene synthase) - Gossypium hirsutum (Upland cotton) & (at5g23960 : 372,0) Encodes a sesquiterpene synthase involved in generating all of the group A sesquiterpenes found in the Arabidopsis floral volatile blend, Strongly expressed in the stigma,; terpene synthase 21 (TPS…	4.45178
16.1.5	secondary metabolism.isoprenoids.terpenoids	phvul.006g156900.1	Vung76278|c1_g7_i3	(gnl|cdd|35718 : 1151,0) no description available & (at1g78950 : 1029,0) Terpenoid cyclases family protein; CONTAINS InterPro DOMAIN/s: Terpene synthase, conserved site (InterPro:IPR002365), Squalene cyclase (InterPro:IPR018333), Terpenoid cylases/protein prenyltransferase alpha-alpha toroid (InterPro:IPR008930), Prenyltransferase/squalene oxidase (InterPro:IPR001330); BEST Arabidopsis thaliana p…	-2.65513
16.1.5	secondary metabolism.isoprenoids.terpenoids	phvul.006g156000.1	Vung76278|c1_g3_i2	(gnl|cdd|35718 : 1156,0) no description available & (at1g78950 : 1036,0) Terpenoid cyclases family protein; CONTAINS InterPro DOMAIN/s: Terpene synthase, conserved site (InterPro:IPR002365), Squalene cyclase (InterPro:IPR018333), Terpenoid cylases/protein prenyltransferase alpha-alpha toroid (InterPro:IPR008930), Prenyltransferase/squalene oxidase (InterPro:IPR001330); BEST Arabidopsis thaliana p…	-3.76411
16.1.5	secondary metabolism.isoprenoids.terpenoids	phvul.002g219300.1	Vung166196|c1_g1_i5	(gnl|cdd|29478 : 399,0) no description available & (at1g61680 : 398,0) terpene synthase 14 (TPS14); CONTAINS InterPro DOMAIN/s: Terpene synthase, metal-binding domain (InterPro:IPR005630), Terpenoid synthase (InterPro:IPR008949), Terpenoid cylases/protein prenyltransferase alpha-alpha toroid (InterPro:IPR008930), Terpene synthase-like (InterPro:IPR001906); BEST Arabidopsis thaliana protein match …	5.25156
16.2	secondary metabolism.phenylpropanoids	phvul.006g024000.1	Vung72348|c0_g1_i3	(at1g78990 : 462,0) HXXXD-type acyl-transferase family protein; FUNCTIONS IN: transferase activity, transferring acyl groups other than amino-acyl groups, transferase activity; INVOLVED IN: biological_process unknown; LOCATED IN: cellular_component unknown; EXPRESSED IN: root; CONTAINS InterPro DOMAIN/s: Transferase (InterPro:IPR003480); BEST Arabidopsis thaliana protein match is: HXXXD-type acyl…	1.24974
16.2	secondary metabolism.phenylpropanoids	phvul.006g075000.1	Vung128603|c0_g2_i1	(at2g25150 : 362,0) HXXXD-type acyl-transferase family protein; FUNCTIONS IN: transferase activity, transferring acyl groups other than amino-acyl groups, transferase activity; INVOLVED IN: biological_process unknown; LOCATED IN: cellular_component unknown; EXPRESSED IN: 9 plant structures; EXPRESSED DURING: petal differentiation and expansion stage, E expanded cotyledon stage, D bilateral stage;…	1.42317
16.2.1.1	secondary metabolism.phenylpropanoids.lignin biosynthesis.PAL	phvul.007g150500.1	Vung55974|c3_g2_i2	(p19142|pal2_phavu : 1422,0) Phenylalanine ammonia-lyase class 2 (EC 4,3,1,5) (Phenylalanine ammonia-lyase class II) - Phaseolus vulgaris (Kidney bean) (French bean) & (at2g37040 : 1196,0) Encodes PAL1, a phenylalanine ammonia-lyase, Arabidopsis has four PALs: AT2G37040 (PAL1), AT3G53260 (PAL2), AT5G04230 (PAL3) and AT3G10340 (PAL4),; PHE ammonia lyase 1 (PAL1); FUNCTIONS IN: phenylalanine ammoni…	2.30985
16.2.1.1	secondary metabolism.phenylpropanoids.lignin biosynthesis.PAL	phvul.001g177800.1	Vung55974|c3_g4_i4	(p27991|pal1_soybn : 1337,0) Phenylalanine ammonia-lyase 1 (EC 4,3,1,5) - Glycine max (Soybean) & (at2g37040 : 1202,0) Encodes PAL1, a phenylalanine ammonia-lyase, Arabidopsis has four PALs: AT2G37040 (PAL1), AT3G53260 (PAL2), AT5G04230 (PAL3) and AT3G10340 (PAL4),; PHE ammonia lyase 1 (PAL1); FUNCTIONS IN: phenylalanine ammonia-lyase activity; INVOLVED IN: in 10 processes; LOCATED IN: cytoplasm;…	1.19349
16.2.1.2	secondary metabolism.phenylpropanoids.lignin biosynthesis.C4H	phvul.006g079700.1	Vung47701|c0_g1_i1	(q42797|tcmo_soybn : 846,0) Trans-cinnamate 4-monooxygenase (EC 1,14,13,11) (Cinnamic acid 4-hydroxylase) (CA4H) (C4H) (P450C4H) (Cytochrome P450 73) - Glycine max (Soybean) & (at2g30490 : 783,0) Encodes a cinnamate-4-hydroxylase, Mutations in this gene impact phenylpropanoid metabolism, growth and development,; cinnamate-4-hydroxylase (C4H); FUNCTIONS IN: trans-cinnamate 4-monooxygenase activity…	4.94875
16.2.1.3	secondary metabolism.phenylpropanoids.lignin biosynthesis.4CL	phvul.002g040100.1	Vung156259|c2_g1_i4	(p31687|4cl2_soybn : 949,0) 4-coumarate--CoA ligase 2 (EC 6,2,1,12) (4CL 2) (4-coumaroyl-CoA synthase 2) (Clone 4CL16) - Glycine max (Soybean) & (at1g65060 : 763,0) encodes an isoform of 4-coumarate:CoA ligase (4CL), which is involved in the last step of the general phenylpropanoid pathway, mRNA levels are not induced in response to wounding or to fungal infection by P, parasitica, mRNA is expres…	3.08738
16.2.1.7	secondary metabolism.phenylpropanoids.lignin biosynthesis.CCR1	phvul.010g160700.1	Vung161073|c0_g1_i11	(at1g15950 : 486,0) Encodes a cinnamoyl CoA reductase, Involved in lignin biosynthesis,; cinnamoyl coa reductase 1 (CCR1); CONTAINS InterPro DOMAIN/s: NAD-dependent epimerase/dehydratase (InterPro:IPR001509), NAD(P)-binding domain (InterPro:IPR016040); BEST Arabidopsis thaliana protein match is: cinnamoyl coa reductase (TAIR:AT1G80820,1); Has 11995 Blast hits to 11983 proteins in 1896 species: Ar…	2.85992
16.2.1.10	secondary metabolism.phenylpropanoids.lignin biosynthesis.CAD	phvul.003g287400.1	Vung56670|c4_g2_i9	(gnl|cdd|35246 : 465,0) no description available & (q9zrf1|mtdh_fraan : 418,0) Probable mannitol dehydrogenase (EC 1,1,1,255) (NAD-dependent mannitol dehydrogenase) - Fragaria ananassa (Strawberry) & (gnl|cdd|31264 : 345,0) no description available & (at4g37990 : 338,0) Encodes an aromatic alcohol:NADP+ oxidoreductase whose mRNA levels are increased in response to treatment with a variety of phyt…	-5.21068
16.4.1	secondary metabolism.N misc.alkaloid-like	phvul.003g281200.1	Vung163436|c3_g2_i8	(at3g57030 : 278,0) Calcium-dependent phosphotriesterase superfamily protein; FUNCTIONS IN: strictosidine synthase activity; INVOLVED IN: alkaloid biosynthetic process, biosynthetic process; LOCATED IN: endoplasmic reticulum, plasma membrane, plant-type cell wall; EXPRESSED IN: 24 plant structures; EXPRESSED DURING: 13 growth stages; CONTAINS InterPro DOMAIN/s: Strictosidine synthase, conserved r…	1.7082
16.4.1	secondary metabolism.N misc.alkaloid-like	phvul.006g125700.1	Vung166455|c8_g3_i1	(at4g20840 : 663,0) FAD-binding Berberine family protein; FUNCTIONS IN: electron carrier activity, oxidoreductase activity, FAD binding, catalytic activity; LOCATED IN: apoplast, plasma membrane; EXPRESSED IN: 21 plant structures; EXPRESSED DURING: 10 growth stages; CONTAINS InterPro DOMAIN/s: FAD-binding, type 2 (InterPro:IPR016166), Berberine/berberine-like (InterPro:IPR012951), FAD linked oxid…	2.18103
16.4.1	secondary metabolism.N misc.alkaloid-like	phvul.002g200400.1	Vung115707|c1_g4_i10	(at4g20820 : 496,0) FAD-binding Berberine family protein; FUNCTIONS IN: electron carrier activity, oxidoreductase activity, FAD binding, catalytic activity; INVOLVED IN: oxidation reduction; EXPRESSED IN: 6 plant structures; EXPRESSED DURING: LP,06 six leaves visible, LP,04 four leaves visible, LP,08 eight leaves visible; CONTAINS InterPro DOMAIN/s: FAD-binding, type 2 (InterPro:IPR016166), Oxyge…	4.0161
16.4.1	secondary metabolism.N misc.alkaloid-like	phvul.002g200600.1	Vung131345|c4_g7_i17	(at4g20820 : 492,0) FAD-binding Berberine family protein; FUNCTIONS IN: electron carrier activity, oxidoreductase activity, FAD binding, catalytic activity; INVOLVED IN: oxidation reduction; EXPRESSED IN: 6 plant structures; EXPRESSED DURING: LP,06 six leaves visible, LP,04 four leaves visible, LP,08 eight leaves visible; CONTAINS InterPro DOMAIN/s: FAD-binding, type 2 (InterPro:IPR016166), Oxyge…	5.93013
16.5.1.1.1.7	secondary metabolism.sulfur-containing.glucosinolates.synthesis.aliphatic.CYP83A1 phenylacetaldoxime monooxygenase	phvul.010g077000.1	Vung152781|c3_g1_i4	(gnl|cdd|35378 : 473,0) no description available & (at4g31500 : 407,0) Encodes an oxime-metabolizing enzyme in the biosynthetic pathway of glucosinolates, Is required for phytochrome signal transduction in red light, Mutation confers auxin overproduction,; "cytochrome P450, family 83, subfamily B, polypeptide 1" (CYP83B1); FUNCTIONS IN: oxidoreductase activity, acting on paired donors, with incor…	-1.53206
16.5.1.1.1.12	secondary metabolism.sulfur-containing.glucosinolates.synthesis.aliphatic.benzoate-CoA ligase	phvul.006g086100.1	Vung63548|c0_g1_i2	(gnl|cdd|82505 : 743,0) no description available & (at1g65890 : 672,0) acyl activating enzyme 12 (AAE12); FUNCTIONS IN: catalytic activity; INVOLVED IN: metabolic process; EXPRESSED IN: leaf apex, hypocotyl, flower; EXPRESSED DURING: petal differentiation and expansion stage; CONTAINS InterPro DOMAIN/s: AMP-dependent synthetase/ligase (InterPro:IPR000873); BEST Arabidopsis thaliana protein match …	3.52577
16.5.1.1.3.4	secondary metabolism.sulfur-containing.glucosinolates.synthesis.indole.cytochrome P450 monooxygenase	phvul.010g013000.1	Vung121144|c0_g1_i1	(at4g37370 : 515,0) member of CYP81D; "cytochrome P450, family 81, subfamily D, polypeptide 8" (CYP81D8); FUNCTIONS IN: electron carrier activity, monooxygenase activity, iron ion binding, oxygen binding, heme binding; INVOLVED IN: response to karrikin; LOCATED IN: endoplasmic reticulum, plasma membrane; EXPRESSED IN: 20 plant structures; EXPRESSED DURING: 13 growth stages; CONTAINS InterPro DOMA…	3.41418
16.5.1.1.3.4	secondary metabolism.sulfur-containing.glucosinolates.synthesis.indole.cytochrome P450 monooxygenase	phvul.010g013100.1	Vung161149|c2_g1_i7	(at4g37370 : 519,0) member of CYP81D; "cytochrome P450, family 81, subfamily D, polypeptide 8" (CYP81D8); FUNCTIONS IN: electron carrier activity, monooxygenase activity, iron ion binding, oxygen binding, heme binding; INVOLVED IN: response to karrikin; LOCATED IN: endoplasmic reticulum, plasma membrane; EXPRESSED IN: 20 plant structures; EXPRESSED DURING: 13 growth stages; CONTAINS InterPro DOMA…	3.00154
16.5.1.1.3.4	secondary metabolism.sulfur-containing.glucosinolates.synthesis.indole.cytochrome P450 monooxygenase	phvul.010g012900.1	Vung161149|c2_g1_i5	(at4g37370 : 521,0) member of CYP81D; "cytochrome P450, family 81, subfamily D, polypeptide 8" (CYP81D8); FUNCTIONS IN: electron carrier activity, monooxygenase activity, iron ion binding, oxygen binding, heme binding; INVOLVED IN: response to karrikin; LOCATED IN: endoplasmic reticulum, plasma membrane; EXPRESSED IN: 20 plant structures; EXPRESSED DURING: 13 growth stages; CONTAINS InterPro DOMA…	3.20888
16.5.1.1.4.1	secondary metabolism.sulfur-containing.glucosinolates.synthesis.shared.CYP83B1 phenylacetaldoxime monooxygenase	phvul.010g077000.1	Vung152781|c3_g1_i4	(gnl|cdd|35378 : 473,0) no description available & (at4g31500 : 407,0) Encodes an oxime-metabolizing enzyme in the biosynthetic pathway of glucosinolates, Is required for phytochrome signal transduction in red light, Mutation confers auxin overproduction,; "cytochrome P450, family 83, subfamily B, polypeptide 1" (CYP83B1); FUNCTIONS IN: oxidoreductase activity, acting on paired donors, with incor…	-1.53206
16.5.1.2.1	secondary metabolism.sulfur-containing.glucosinolates.regulation.aliphatic	phvul.009g228200.1	Vung165523|c3_g2_i1	(p10290|mybc_maize : 145,0) Anthocyanin regulatory C1 protein - Zea mays (Maize) & (at3g13540 : 142,0) Encodes a member of the MYB family of transcriptional regulators, MYB5 act as a negative regulator of trichome branching and play a role in the correct formation of the seed coat and possibly the formation the underlying endosperm layers, Loss of function mutations have defects in seed coat muci…	-1.05586
16.5.1.2.1	secondary metabolism.sulfur-containing.glucosinolates.regulation.aliphatic	phvul.005g109800.1	Vung54462|c0_g1_i2	(p20024|myb1_maize : 192,0) Myb-related protein Zm1 - Zea mays (Maize) & (at4g21440 : 185,0) Encodes a MYB transcription factor involved in wounding and osmotic stress response, Member of the R2R3 factor gene family,; MYB-like 102 (MYB102); CONTAINS InterPro DOMAIN/s: SANT, DNA-binding (InterPro:IPR001005), Homeodomain-like (InterPro:IPR009057), Myb, DNA-binding (InterPro:IPR014778), HTH transcri…	4.72749
16.5.1.2.1	secondary metabolism.sulfur-containing.glucosinolates.regulation.aliphatic	phvul.005g109700.1	Vung14|c0_g1_i3	(q7xbh4|myb4_orysa : 174,0) Myb-related protein Myb4 (OsMyb4) (Transcription factor RLTR1) - Oryza sativa (Rice) & (gnl|cdd|35271 : 172,0) no description available & (at3g01140 : 171,0) Encodes a MIXTA-like MYB gene NOECK (NOK), Loss of function mutations show an increased number of branchpoints in leaf trichomes suggesting a role in negative regulation of trichome branching,; myb domain protein …	4.35281
16.5.1.2.3	secondary metabolism.sulfur-containing.glucosinolates.regulation.indole	phvul.009g228200.1	Vung165523|c3_g2_i1	(p10290|mybc_maize : 145,0) Anthocyanin regulatory C1 protein - Zea mays (Maize) & (at3g13540 : 142,0) Encodes a member of the MYB family of transcriptional regulators, MYB5 act as a negative regulator of trichome branching and play a role in the correct formation of the seed coat and possibly the formation the underlying endosperm layers, Loss of function mutations have defects in seed coat muci…	-1.05586
16.5.1.2.3	secondary metabolism.sulfur-containing.glucosinolates.regulation.indole	phvul.005g109800.1	Vung54462|c0_g1_i2	(p20024|myb1_maize : 192,0) Myb-related protein Zm1 - Zea mays (Maize) & (at4g21440 : 185,0) Encodes a MYB transcription factor involved in wounding and osmotic stress response, Member of the R2R3 factor gene family,; MYB-like 102 (MYB102); CONTAINS InterPro DOMAIN/s: SANT, DNA-binding (InterPro:IPR001005), Homeodomain-like (InterPro:IPR009057), Myb, DNA-binding (InterPro:IPR014778), HTH transcri…	4.72749
16.5.1.2.3	secondary metabolism.sulfur-containing.glucosinolates.regulation.indole	phvul.005g109700.1	Vung14|c0_g1_i3	(q7xbh4|myb4_orysa : 174,0) Myb-related protein Myb4 (OsMyb4) (Transcription factor RLTR1) - Oryza sativa (Rice) & (gnl|cdd|35271 : 172,0) no description available & (at3g01140 : 171,0) Encodes a MIXTA-like MYB gene NOECK (NOK), Loss of function mutations show an increased number of branchpoints in leaf trichomes suggesting a role in negative regulation of trichome branching,; myb domain protein …	4.35281
16.5.1.2.3	secondary metabolism.sulfur-containing.glucosinolates.regulation.indole	phvul.011g109700.1	Vung45798|c0_g2_i4	(at2g31180 : 175,0) Member of the R2R3 factor gene family,; myb domain protein 14 (MYB14); CONTAINS InterPro DOMAIN/s: SANT, DNA-binding (InterPro:IPR001005), Homeodomain-like (InterPro:IPR009057), Myb, DNA-binding (InterPro:IPR014778), HTH transcriptional regulator, Myb-type, DNA-binding (InterPro:IPR017930), Homeodomain-related (InterPro:IPR012287), Myb transcription factor (InterPro:IPR015495)…	3.82071
16.5.1.2.3	secondary metabolism.sulfur-containing.glucosinolates.regulation.indole	phvul.011g109600.1	Vung45798|c0_g3_i4	(p20024|myb1_maize : 174,0) Myb-related protein Zm1 - Zea mays (Maize) & (at2g31180 : 173,0) Member of the R2R3 factor gene family,; myb domain protein 14 (MYB14); CONTAINS InterPro DOMAIN/s: SANT, DNA-binding (InterPro:IPR001005), Homeodomain-like (InterPro:IPR009057), Myb, DNA-binding (InterPro:IPR014778), HTH transcriptional regulator, Myb-type, DNA-binding (InterPro:IPR017930), Homeodomain-re…	5.27531
16.5.99.1	secondary metabolism.sulfur-containing.misc.alliinase	phvul.004g088400.1	Vung138657|c2_g1_i9	(at1g34060 : 486,0) Pyridoxal phosphate (PLP)-dependent transferases superfamily protein; FUNCTIONS IN: carbon-sulfur lyase activity, pyridoxal phosphate binding, catalytic activity; LOCATED IN: endomembrane system; CONTAINS InterPro DOMAIN/s: Pyridoxal phosphate-dependent transferase, major domain (InterPro:IPR015424), EGF-like, alliinase (InterPro:IPR006947), Pyridoxal phosphate-dependent trans…	7.75767
16.8.1	secondary metabolism.flavonoids.anthocyanins	phvul.010g037000.1	Vung122878|c5_g1_i3	(at2g22590 : 382,0) UDP-Glycosyltransferase superfamily protein; FUNCTIONS IN: transferase activity, transferring glycosyl groups; INVOLVED IN: metabolic process; LOCATED IN: cellular_component unknown; CONTAINS InterPro DOMAIN/s: UDP-glucuronosyl/UDP-glucosyltransferase (InterPro:IPR002213); BEST Arabidopsis thaliana protein match is: UDP-Glycosyltransferase superfamily protein (TAIR:AT5G65550,1…	2.3466
16.8.1	secondary metabolism.flavonoids.anthocyanins	phvul.008g223500.1	Vung154832|c0_g1_i2	(at5g05600 : 518,0) 2-oxoglutarate (2OG) and Fe(II)-dependent oxygenase superfamily protein; FUNCTIONS IN: oxidoreductase activity, iron ion binding; INVOLVED IN: response to salt stress, response to karrikin; EXPRESSED IN: 15 plant structures; EXPRESSED DURING: 9 growth stages; CONTAINS InterPro DOMAIN/s: Isopenicillin N synthase (InterPro:IPR002283), Oxoglutarate/iron-dependent oxygenase (Inter…	5.55397
16.8.1	secondary metabolism.flavonoids.anthocyanins	phvul.008g098500.1	Vung70178|c0_g1_i2	(at5g05600 : 478,0) 2-oxoglutarate (2OG) and Fe(II)-dependent oxygenase superfamily protein; FUNCTIONS IN: oxidoreductase activity, iron ion binding; INVOLVED IN: response to salt stress, response to karrikin; EXPRESSED IN: 15 plant structures; EXPRESSED DURING: 9 growth stages; CONTAINS InterPro DOMAIN/s: Isopenicillin N synthase (InterPro:IPR002283), Oxoglutarate/iron-dependent oxygenase (Inter…	6.34614
16.8.1	secondary metabolism.flavonoids.anthocyanins	phvul.001g244000.1	Vung41730|c0_g1_i1	(at5g05600 : 494,0) 2-oxoglutarate (2OG) and Fe(II)-dependent oxygenase superfamily protein; FUNCTIONS IN: oxidoreductase activity, iron ion binding; INVOLVED IN: response to salt stress, response to karrikin; EXPRESSED IN: 15 plant structures; EXPRESSED DURING: 9 growth stages; CONTAINS InterPro DOMAIN/s: Isopenicillin N synthase (InterPro:IPR002283), Oxoglutarate/iron-dependent oxygenase (Inter…	5.83926
16.8.1	secondary metabolism.flavonoids.anthocyanins	phvul.006g208400.1	Vung49262|c0_g1_i1	(at2g22590 : 365,0) UDP-Glycosyltransferase superfamily protein; FUNCTIONS IN: transferase activity, transferring glycosyl groups; INVOLVED IN: metabolic process; LOCATED IN: cellular_component unknown; CONTAINS InterPro DOMAIN/s: UDP-glucuronosyl/UDP-glucosyltransferase (InterPro:IPR002213); BEST Arabidopsis thaliana protein match is: UDP-Glycosyltransferase superfamily protein (TAIR:AT5G65550,1…	1.08147
16.8.1.12	secondary metabolism.flavonoids.anthocyanins.anthocyanidin 3-O-glucosyltransferase	phvul.010g037000.1	Vung122878|c5_g1_i3	(at2g22590 : 382,0) UDP-Glycosyltransferase superfamily protein; FUNCTIONS IN: transferase activity, transferring glycosyl groups; INVOLVED IN: metabolic process; LOCATED IN: cellular_component unknown; CONTAINS InterPro DOMAIN/s: UDP-glucuronosyl/UDP-glucosyltransferase (InterPro:IPR002213); BEST Arabidopsis thaliana protein match is: UDP-Glycosyltransferase superfamily protein (TAIR:AT5G65550,1…	2.3466
16.8.1.12	secondary metabolism.flavonoids.anthocyanins.anthocyanidin 3-O-glucosyltransferase	phvul.006g208400.1	Vung49262|c0_g1_i1	(at2g22590 : 365,0) UDP-Glycosyltransferase superfamily protein; FUNCTIONS IN: transferase activity, transferring glycosyl groups; INVOLVED IN: metabolic process; LOCATED IN: cellular_component unknown; CONTAINS InterPro DOMAIN/s: UDP-glucuronosyl/UDP-glucosyltransferase (InterPro:IPR002213); BEST Arabidopsis thaliana protein match is: UDP-Glycosyltransferase superfamily protein (TAIR:AT5G65550,1…	1.08147
16.8.1.21	secondary metabolism.flavonoids.anthocyanins.anthocyanin 5-aromatic acyltransferase	phvul.008g032400.1	Vung52945|c3_g2_i12	(at5g39080 : 273,0) HXXXD-type acyl-transferase family protein; FUNCTIONS IN: transferase activity, transferring acyl groups other than amino-acyl groups, transferase activity; INVOLVED IN: biological_process unknown; LOCATED IN: cellular_component unknown; EXPRESSED IN: 16 plant structures; EXPRESSED DURING: 9 growth stages; CONTAINS InterPro DOMAIN/s: Transferase (InterPro:IPR003480); BEST Arab…	1.68937
16.8.3	secondary metabolism.flavonoids.dihydroflavonols	phvul.008g140800.1	Vung31870|c0_g1_i1	(at4g01070 : 444,0) the glycosyltransferase (UGT72B1) is involved in metabolizing xenobiotica (chloroaniline and chlorophenole), Comparison between wild type and knock-out mutant demonstrates the central role of this gene for metabolizing chloroaniline but significantly less for chlorophenole, The glucosyltransferase preferred UDP-xylose over UDP-glucose indicating its (additional) functioning as…	2.89165
16.8.3	secondary metabolism.flavonoids.dihydroflavonols	phvul.008g177900.1	Vung41621|c0_g1_i2	(gnl|cdd|35365 : 285,0) no description available & (at4g10500 : 205,0) 2-oxoglutarate (2OG) and Fe(II)-dependent oxygenase superfamily protein; FUNCTIONS IN: oxidoreductase activity, acting on paired donors, with incorporation or reduction of molecular oxygen, 2-oxoglutarate as one donor, and incorporation of one atom each of oxygen into both donors, oxidoreductase activity; INVOLVED IN: secondar…	1.96368
16.8.4	secondary metabolism.flavonoids.flavonols	phvul.008g177900.1	Vung41621|c0_g1_i2	(gnl|cdd|35365 : 285,0) no description available & (at4g10500 : 205,0) 2-oxoglutarate (2OG) and Fe(II)-dependent oxygenase superfamily protein; FUNCTIONS IN: oxidoreductase activity, acting on paired donors, with incorporation or reduction of molecular oxygen, 2-oxoglutarate as one donor, and incorporation of one atom each of oxygen into both donors, oxidoreductase activity; INVOLVED IN: secondar…	1.96368
16.8.4	secondary metabolism.flavonoids.flavonols	phvul.001g182400.1	Vung81306|c3_g1_i3	(at2g36750 : 553,0) UDP-glucosyl transferase 73C1 (UGT73C1); CONTAINS InterPro DOMAIN/s: UDP-glucuronosyl/UDP-glucosyltransferase (InterPro:IPR002213); BEST Arabidopsis thaliana protein match is: don-glucosyltransferase 1 (TAIR:AT2G36800,1); Has 7705 Blast hits to 7611 proteins in 415 species: Archae - 0; Bacteria - 205; Metazoa - 2197; Fungi - 31; Plants - 5129; Viruses - 79; Other Eukaryotes - …	1.16275
16.8.4.1	secondary metabolism.flavonoids.flavonols.flavonol synthase (FLS)	phvul.008g166000.1	Vung38337|c0_g1_i1	(q07512|fls_pethy : 438,0) Flavonol synthase/flavanone 3-hydroxylase (EC 1,14,11,23) (EC 1,14,11,9) (FLS) - Petunia hybrida (Petunia) & (at5g08640 : 385,0) Encodes a flavonol synthase that catalyzes formation of flavonols from dihydroflavonols,; flavonol synthase 1 (FLS1); CONTAINS InterPro DOMAIN/s: Oxoglutarate/iron-dependent oxygenase (InterPro:IPR005123); BEST Arabidopsis thaliana protein mat…	3.30696
16.8.4.2	secondary metabolism.flavonoids.flavonols.flavonol 3-O-glycosyltransferase	phvul.003g097300.1	Vung5028|c0_g1_i2	(at2g15490 : 383,0) UDP-glycosyltransferase 73B4 (UGT73B4); FUNCTIONS IN: quercetin 3-O-glucosyltransferase activity, UDP-glycosyltransferase activity, quercetin 7-O-glucosyltransferase activity, UDP-glucosyltransferase activity, transferase activity, transferring glycosyl groups; INVOLVED IN: response to other organism; LOCATED IN: endomembrane system; EXPRESSED IN: root; CONTAINS InterPro DOMAI…	-1.42044
16.8.5.1	secondary metabolism.flavonoids.isoflavones.isoflavone reductase	phvul.005g010200.1	Vung84750|c6_g2_i7	(at1g75280 : 261,0) isoflavone reductase, putative, identical to SP:P52577 Isoflavone reductase homolog P3 (EC 1,3,1,-) {Arabidopsis thaliana}; contains Pfam profile PF02716: isoflavone reductase, Involved in response to oxidative stress,; NmrA-like negative transcriptional regulator family protein; FUNCTIONS IN: binding, catalytic activity; INVOLVED IN: response to oxidative stress, response to …	5.03958
16.8.5.1	secondary metabolism.flavonoids.isoflavones.isoflavone reductase	phvul.002g033000.1	Vung127961|c1_g2_i7	(p52575|ifr_medsa : 533,0) Isoflavone reductase (EC 1,3,1,45) (IFR) (2'-hydroxyisoflavone reductase) (NADPH:isoflavone oxidoreductase) - Medicago sativa (Alfalfa) & (at4g39230 : 338,0) encodes a protein whose sequence is similar to phenylcoumaran benzylic ether reductase (PCBER), which catalyzes NADPH-dependent reduction of 8-5' linked lignans such as dehydrodiconiferyl alcohol to give isodihydro…	2.42719
16.1	secondary metabolism.simple phenols	phvul.008g119000.1	Vung151395|c0_g1_i2	(at5g60020 : 784,0) putative laccase, a member of laccase family of genes (17 members in Arabidopsis),; laccase 17 (LAC17); FUNCTIONS IN: laccase activity; INVOLVED IN: oxidation reduction, lignin catabolic process; LOCATED IN: endomembrane system, apoplast; EXPRESSED IN: 14 plant structures; EXPRESSED DURING: LP,04 four leaves visible, 4 anthesis, C globular stage, petal differentiation and expa…	2.13833
16.1	secondary metabolism.simple phenols	phvul.002g031700.1	Vung16125|c1_g1_i1	(at5g03260 : 853,0) putative laccase, a member of laccase family of genes (17 members in Arabidopsis),; laccase 11 (LAC11); FUNCTIONS IN: laccase activity; INVOLVED IN: oxidation reduction, lignin catabolic process; LOCATED IN: endomembrane system, apoplast; EXPRESSED IN: 24 plant structures; EXPRESSED DURING: 13 growth stages; CONTAINS InterPro DOMAIN/s: Multicopper oxidase, type 3 (InterPro:IPR…	5.1512
