# Supplementary material for: Unlocking Cowpea’s Defense Responses: Conserved Transcriptional Signatures in the Battle against CABMV and CPSMV Viruses
Source: Life (Basel). 2023 Aug 15;13(8):1747. doi: 10.3390/life13081747 (PMC10455494; doi:10.3390/life13081747)
Supplement: Supplementary file 1 [file life-13-01747-s001.zip › ok_Table_S3.xlsx]

## Sheet: Tabela_Suplementar_3
CTS group	Annotation I	ID_CTS	Annotation II	Pfam	EC number	Log2FC
						CpSMV (one hpi)	CABMV (one hpi)	CpSMV (16 hpi)	CABMV (16 hpi)
CTS-1DR	TIR-NBS-LRR	Vung129014|c5_g2_i6	Disease resistance protein (TIR-NBS-LRR)	PF13676, PF00931	-	-1.69275	-1.2767	-	-
CTS-1UR	CC-NBS-LRR	Vung21816|c1_g1_i1	Disease resistance protein (CC-NBS-LRR)	PF05659, PF00931	-	1.1659	1.16047	-	-
CTS-1UR	TIR-NBS-LRR	Vung38005|c5_g4_i4	Disease resistance protein (TIR-NBS-LRR)	PF13676, PF00931	-	6.78782	6.84931	-	-
CTS-1UR	TIR-NBS-LRR	Vung27401|c1_g1_i3	Disease resistance protein (TIR-NBS-LRR)	PF00170, PF13676, PF00931	-	5.5641	6.28998	-	-
CTS-1UR	CC-NBS-LRR	Vung144782|c0_g1_i1	Disease resistance protein (CC-NBS-LRR)	PF00931	-	3.15595	2.48575	-	-
CTS-16DR	CC-NBS-LRR	Vung82198|c6_g1_i5	Disease resistance protein (CC-NBS-LRR)	-	-	-	-	-1.30073	-3.56076
CTS-1DR	PR2	Vung50649|c0_g2_i1	Endo-1,3-beta-glucanase	PF00332	3.2.1.39	-1.03674	-1.10727	-	-
CTS-1UR	PR2	Vung119858|c0_g3_i1	Endo-1,3-beta-glucanase	PF00332	3.2.1.39	5.21549	3.02818	-	-
CTS-1UR	PR2	Vung28938|c0_g2_i2	Endo-1,3-beta-glucanase	PF00332	3.2.1.39	2.31255	1.47102	-	-
CTS-1UR	PR2	Vung44648|c1_g1_i1	Endo-1,3-beta-glucanase	PF07983, PF00332	3.2.1.39	2.66364	1.81021	-	-
CTS-1UR	PR2	Vung134920|c2_g1_i2	Endo-1,3-beta-glucanase	PF07983, PF00332	3.2.1.39	1.62257	2.29643	-	-
CTS-1UR	PR2	Vung122612|c1_g1_i4	Endo-1,3-beta-glucanase	PF00332	3.2.1.39	1.04255	2.24203	-	-
CTS-1UR	PR5	Vung83475|c0_g1_i1	Osmotin 34	PF00314	-	3.47353	1.11776	4.2339	-
CTS-1UR	PR5	Vung95346|c0_g1_i1	Thaumatin	PF00314	-	1.53195	2.25442	-	-
CTS-1UR	PR5	Vung9781|c2_g1_i3	Thaumatin	PF00314	-	2.37846	6.28429	-	-5.87995
CTS-16UR	PR5	Vung44758|c0_g1_i1	Osmotin 34	PF00314	-	-	-	2.54211	3.7397
CTS-1UR	PR9	Vung129517|c0_g1_i13	Peroxidase	PF00141	1.11.1.7	5.4871	4.92153	-	5.35205
CTS-1UR	PR9	Vung87835|c5_g2_i2	Peroxidase	PF00141	1.11.1.7	2.04408	1.90591	-	-
CTS-1UR	PR9	Vung10925|c0_g1_i4	Peroxidase	PF00141	1.11.1.7	4.48896	4.80316	-	-
CTS-1UR	PR9	Vung16847|c1_g1_i8	Peroxidase	PF00141	1.11.1.7	2.09258	5.79854	-	-
CTS-1UR	PR9	Vung47437|c0_g1_i1	Peroxidase	PF00141	1.11.1.7	2.5774	2.37162	-	-
CTS-1UR / CTS-16UR	PR9	Vung104127|c1_g2_i1	Peroxidase	PF00141	1.11.1.7	2.17207	4.14294	2.12259	3.68561
CTS-1UR	PR9	Vung10925|c0_g1_i3	Peroxidase	PF00141	1.11.1.7	2.14192	2.19692	-	-1.61254
CTS-1UR	PR9	Vung111104|c0_g2_i5	Peroxidase	PF00141	1.11.1.7	3.61969	1.98027	-	-
CTS-1UR	PR9	Vung87835|c5_g2_i3	Peroxidase	PF00141	1.11.1.7	1.57754	2.54651	-	-
CTS-1UR	PR9	Vung111104|c0_g2_i6	Peroxidase	PF00141	1.11.1.7	5.77512	2.5829	-	-
CTS-1UR	PR9	Vung87835|c5_g2_i4	Peroxidase	PF00141	1.11.1.7	5.54681	4.10439	-	-
CTS-1UR	PR9	Vung87835|c5_g2_i1	Peroxidase	PF00141	1.11.1.7	1.98627	2.65799	-	-
CTS-1UR	PR9	Vung16847|c1_g1_i4	Peroxidase	PF00141	1.11.1.7	2.46138	3.86241	-	-
CTS-1UR	PR9	Vung12856|c0_g1_i1	Peroxidase	PF00141	1.11.1.7	2.65529	7.96716	-	-
CTS-16UR	PR9	Vung104127|c1_g1_i1	Peroxidase	PF00141	1.11.1.7	-	-	2.10308	3.80921
CTS-1UR / CTS-16UR	PR10	Vung34198|c0_g1_i2	MLP-like protein 423	PF00407	-	2.14102	3.67386	1.97565	3.22242
CTS-1UR	PR10	Vung108032|c0_g2_i1	MLP-like protein 423	PF00407	-	1.69849	2.35126	-	-
CTS-1UR / CTS-16UR	PR10	Vung34198|c0_g1_i1	MLP-like protein 423	PF00407	-	2.72117	2.27352	4.06788	4.0959
CTS-16UR	PR10	Vung103894|c4_g2_i5	MLP-like protein 43	PF00407	-	-	-	3.91078	2.35447
CTS-16UR	PR10	Vung36641|c2_g1_i13	MLP-like protein 423	PF00407	-	-	-	2.74727	4.73778
CTS-16UR	PR10	Vung36641|c2_g1_i1	MLP-like protein 423	PF00407	-	-	-	2.35603	4.73352
CTS-1UR	Chitinase/GH18	Vung124113|c0_g1_i1	Chitinase	PF00704	3.2.1.14	1.39729	4.94088	-	-
CTS-1UR	Chitinase/GH18	Vung150138|c2_g1_i6	Chitinase	PF00704	3.2.1.14	7.85296	7.32374	-	-
CTS-1UR	Chitinase/GH19	Vung79186|c0_g1_i2	Chitinase	PF00187,PF00182	3.2.1.14	1.41008	3.30809	-	-
CTS-1UR	Chitinase/GH18	Vung130424|c0_g1_i1	Chitinase	PF00704	3.2.1.14	6.73401	3.94507	7.48319	-
CTS-16UR	Chitinase/GH19	Vung152630|c0_g2_i1	Chitinase	PF00187, PF00182	3.2.1.14	1.55676	0.701027	3.78373	2.94503
CTS-16DR	Chitinase/GH19	Vung79199|c0_g1_i2	Chitinase	PF00182	3.2.1.14	-	-	-3.45673	-2.13054
