# Supplementary material for: Unlocking Cowpea’s Defense Responses: Conserved Transcriptional Signatures in the Battle against CABMV and CPSMV Viruses
Source: Life (Basel). 2023 Aug 15;13(8):1747. doi: 10.3390/life13081747 (PMC10455494; doi:10.3390/life13081747)
Supplement: Supplementary file 1 [file life-13-01747-s001.zip › ok_Table_S4.xlsx]

## Sheet: CTS
CTS_ID	Annotation	Abbreviation	log2FC				Pfam	EC number	GO
			CPSMV-1h	CABMV-1h	CPSMV-16h	CABMV-16h
Ethylene Biosynthesis
Vung58178|c2_g3_i1	S-adenosylmethionine synthetase	SAM	1.47088	2.96228	ns	ns	PF00438,PF02772,PF02773	2.5.1.6	GO:0006556,GO:0004478,GO:0005524
Vung10561|c1_g2_i2	S-adenosylmethionine synthetase	SAM	1.74149	2.15726	ns	ns	PF00438,PF02772,PF02773	2.5.1.6	GO:0006556,GO:0004478,GO:0005524
Vung8979|c3_g1_i8	S-adenosylmethionine synthetase	SAM	1.25313	2.01707	ns	ns	PF00438,PF02772,PF02773	2.5.1.6	GO:0006556,GO:0004478,GO:0005524
Vung164007|c0_g1_i1	1-aminocyclopropane-1-carboxylate synthase	ACS	3.19825	4.88483	ns	ns	PF00155	4.4.1.14	GO:0030170,GO:0009058
Vung142882|c0_g2_i1	1-aminocyclopropane-1-carboxylate synthase	ACS	3.04602	5.27366	ns	ns	PF00155	4.4.1.14	GO:0030170,GO:0009058
Vung104759|c0_g1_i2	1-aminocyclopropane-1-carboxylate synthase	ACS	1.45111	3.13834	ns	ns	PF00155	4.4.1.14	GO:0030170,GO:0009058
Vung138358|c0_g2_i3	1-aminocyclopropane-1-carboxylate synthase	ACS	-1.168	-1.67066	ns	ns	PF00155	4.4.1.14	GO:0030170,GO:0009058
Vung16921|c0_g2_i1	1-aminocyclopropane-1-carboxylate synthase	ACS	-1.17468	-1.86048	ns	ns	PF00155	4.4.1.14	GO:0030170,GO:0009058
Vung20979|c1_g1_i1	1-aminocyclopropane-1-carboxylate oxidase	ACO	3.87159	2.97449	ns	2.42036	PF14226,PF03171	1.14.17.4	GO:0055114,GO:0016491
Vung20979|c1_g1_i6	1-aminocyclopropane-1-carboxylate oxidase	ACO	3.64484	2.81761	ns	ns	PF14226,PF03171	1.14.17.4	GO:0055114,GO:0016491
Vung20979|c1_g1_i4	1-aminocyclopropane-1-carboxylate oxidase	ACO	ns	ns	3.54709	2.52934	PF14226,PF03171	1.14.17.4	GO:0055114,GO:0016491
Jasmonic Acid Biosynthesis
Vung71975|c0_g1_i4	13-lipoxygenase	LOX	3.18428	3.30202	1.85168	ns	PF00305	1.13.11.12	GO:0055114,GO:0046872,GO:0016702
Vung137946|c0_g1_i1	Allene oxide synthase	AOS	1.98575	1.75675	1.42057	ns	PF00067	4.2.1.92	GO:0055114,GO:0020037,GO:0016705,GO:0005506
Vung137946|c0_g2_i1	Allene oxide synthase	AOS	1.48832	2.11899	ns	ns	PF00067	4.2.1.92	GO:0055114,GO:0020037,GO:0016705,GO:0005506
Vung81738|c0_g1_i1	Allene oxide cyclase	AOC	1.32472	2.71047	ns	ns	PF06351	5.3.99.6	GO:0016853,GO:0009507
Vung109148|c1_g1_i6	Allene oxide cyclase	AOC	5.5686	8.29157	-1.54475	ns	PF06351	5.3.99.6	GO:0016853,GO:0009507
Vung109148|c1_g1_i3	Allene oxide cyclase	AOC	2.93492	3.22358	ns	-0.944961	PF06351	5.3.99.6	GO:0016853,GO:0009507
Vung47861|c0_g1_i1	Allene oxide cyclase	AOC	2.2233	4.52024	ns	ns	PF06351	5.3.99.6	GO:0016853,GO:0009507
Vung115541|c1_g5_i8	12-oxo-phytodienic acid reductase3	OPR3	3.58843	7.84271	ns	ns	PF00724	1.3.1.42	GO:0055114,GO:0016491,GO:0010181
Vung115541|c1_g5_i2	12-oxo-phytodienic acid reductase4	OPR3	3.27253	7.51559	ns	ns	PF00724	1.3.1.42	GO:0055114,GO:0016491,GO:0010181
Vung79280|c3_g1_i1	12-oxo-phytodienic acid reductase5	OPR3	1.24155	2.02424	ns	ns	PF00724	1.3.1.42	GO:0055114,GO:0016491,GO:0010181
Vung115541|c1_g5_i6	12-oxo-phytodienic acid reductase6	OPR3	5.49833	10.3444	ns	ns	PF00724	1.3.1.42	GO:0055114,GO:0016491,GO:0010181
Vung115541|c1_g6_i2	12-oxo-phytodienic acid reductase7	OPR3	4.69951	5.45075	ns	ns	PF00724	1.3.1.42	GO:0055114,GO:0016491,GO:0010181
Vung130443|c3_g2_i8	12-oxo-phytodienic acid reductase8	OPR3	2.60771	3.84891	ns	-0.760933	PF00724	1.3.1.42	GO:0055114,GO:0016491,GO:0010181
Vung75777|c2_g1_i1	12-oxo-phytodienic acid reductase9	OPR3	3.81778	4.85876	ns	ns	PF00724	1.3.1.42	GO:0055114,GO:0016491,GO:0010181
Vung52583|c0_g1_i1	12-oxo-phytodienic acid reductase10	OPR3	3.2682	7.48212	ns	ns	PF00724	1.3.1.42	GO:0055114,GO:0016491,GO:0010181
Vung130443|c3_g2_i15	12-oxo-phytodienic acid reductase11	OPR3	1.31022	1.95228	ns	ns	PF00724	1.3.1.42	GO:0055114,GO:0016491,GO:0010181
Vung130443|c3_g2_i5	12-oxo-phytodienic acid reductase12	OPR3	1.60256	1.99255	ns	-0.606687	PF00724	1.3.1.42	GO:0055114,GO:0016491,GO:0010181
Vung130443|c3_g2_i11	12-oxo-phytodienic acid reductase13	OPR3	2.29536	1.55564	ns	ns	PF00724	1.3.1.42	GO:0055114,GO:0016491,GO:0010181
Vung128603|c0_g2_i1	L-3-ketoacyl-CoAthiolase	KAT	1.42317	2.03627	ns	ns	PF02458	2.3.1.162	GO:0016747
Vung24252|c0_g1_i3	L-3-ketoacyl-CoAthiolase	KAT	5.71524	7.28928	ns	ns	PF02803,PF00108	2.3.1.16	GO:0016747,GO:0008152
