# Supplementary material for: Unlocking Cowpea’s Defense Responses: Conserved Transcriptional Signatures in the Battle against CABMV and CPSMV Viruses
Source: Life (Basel). 2023 Aug 15;13(8):1747. doi: 10.3390/life13081747 (PMC10455494; doi:10.3390/life13081747)
Supplement: Supplementary file 1 [file life-13-01747-s001.zip › ok_Table_S5.xlsx]

## Sheet: Plan1
	Ord	Cowpea Transcript ID	Trancript annotation	CTS group	Primer Left	Primer Right	Eficiency (%)
	1	Vung164007|c0_g1_i1	ACS	CTS-1UR	CTTACAACGACGCAGTGGTG	CTCGTCATCAGAAAGCATCG	94.89
	2	Vung81738|c0_g1_i1	AOC	CTS-1UR	CTGATGAACTCCTTGGGAACC	GTTTGTTATGCAGGCGTGAG	90.97
	3	Vung115541|c1_g5_i8	OPR3	CTS-1UR	AAGGCAGCATCATCTTCTGTC	GCTGGTGGACGATATAGGTG	107.80
	4	Vung136249_c0_g4_i2	PIP1-1	CTS-1UR	AAAGACCTTGGCTGGGATG	ATTTGAAGGGAATGGCTCTG	93.76
	5	Vung47464_c4_g4_i1	PIP2-1	CTS-1UR	AACCCAGCAGTGACATTTGG	ACCCAACTCCACAGATAGCC	90.64
	6	Vung150570|c0_g1_i7	RbOH	CTS-1UR	TAGAGTCATGGTCGGAGACG	CGCTCTTCTTGCTGCTCTTC	97.22
	7	Vung59787_c1_g1_i4	TIP1-2	CTS-1UR	CAATGGTTCAGCAACACCAG	AGGGTTCACATGACCACCAG	95.74
	8	Vung50795|c1_g1_i3	WRKY	CTS-1UR	GCAAATCTCAGCCTCTCTCG	TTCGCTGTTGGTGTTGTTTC	98.77
	REF	VuFBOX	F-box protein	­	CACCAGGATGCAAAAGTGG	ATCCGCTTGTCCCTTGAAC	101.1
	REF	VuUBQ10	Polyubiquitin 10	­	GTCTAAGGGGAGGAATGCAGAT	CAAAGATCAACCTCTGCTGGTC	102.0
