# Supplementary figures and images for: Unlocking Cowpea’s Defense Responses: Conserved Transcriptional Signatures in the Battle against CABMV and CPSMV Viruses
Source: MDPI journal article supplement (doi:10.3390/life13081747), 2023-08-15

PLANT GROWTH

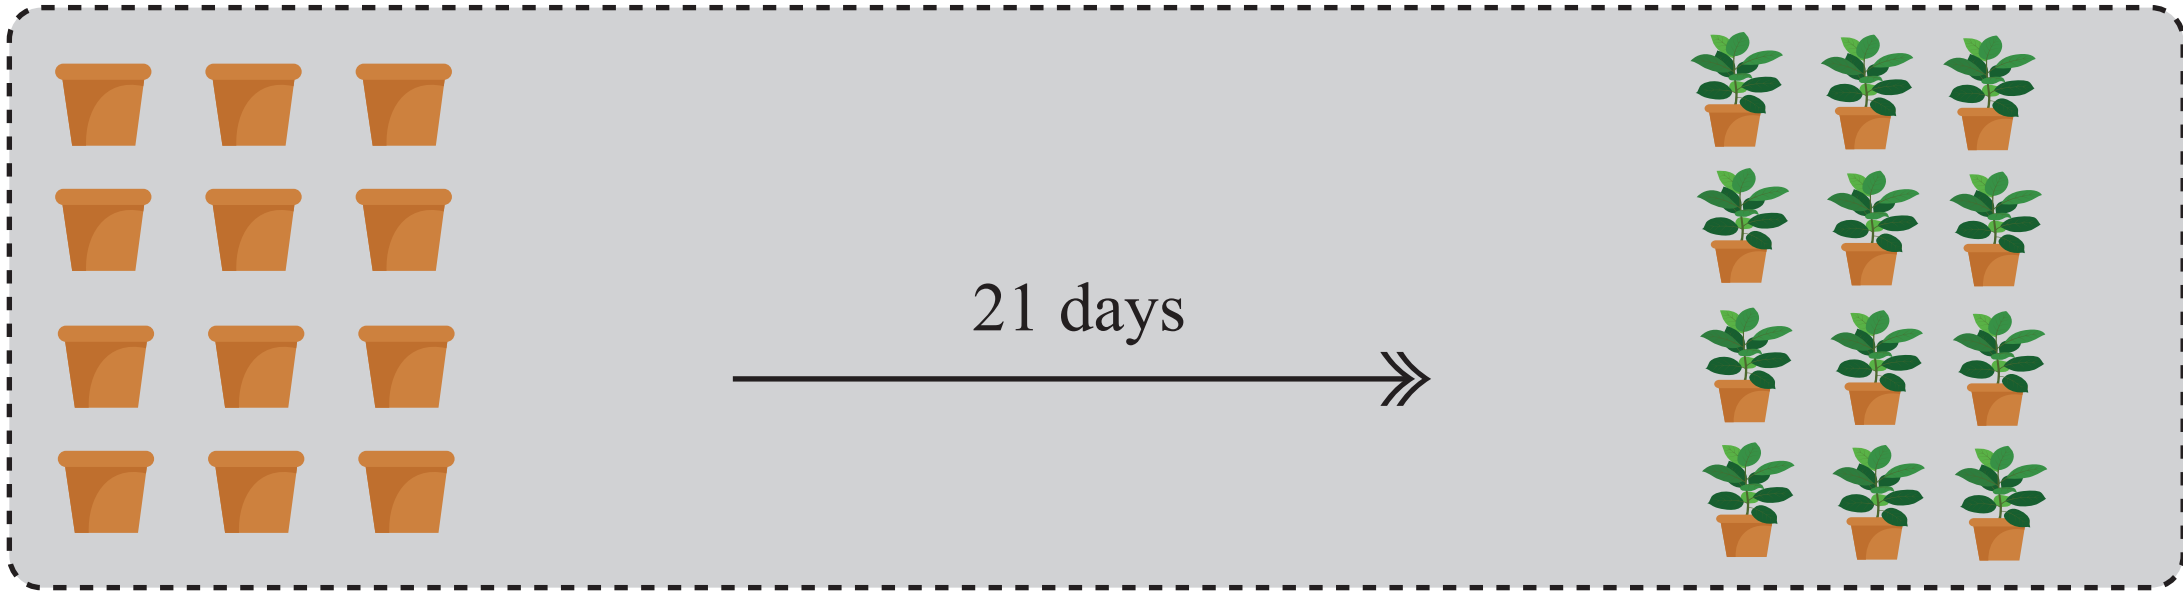

EXPERIMENTAL DESIGN

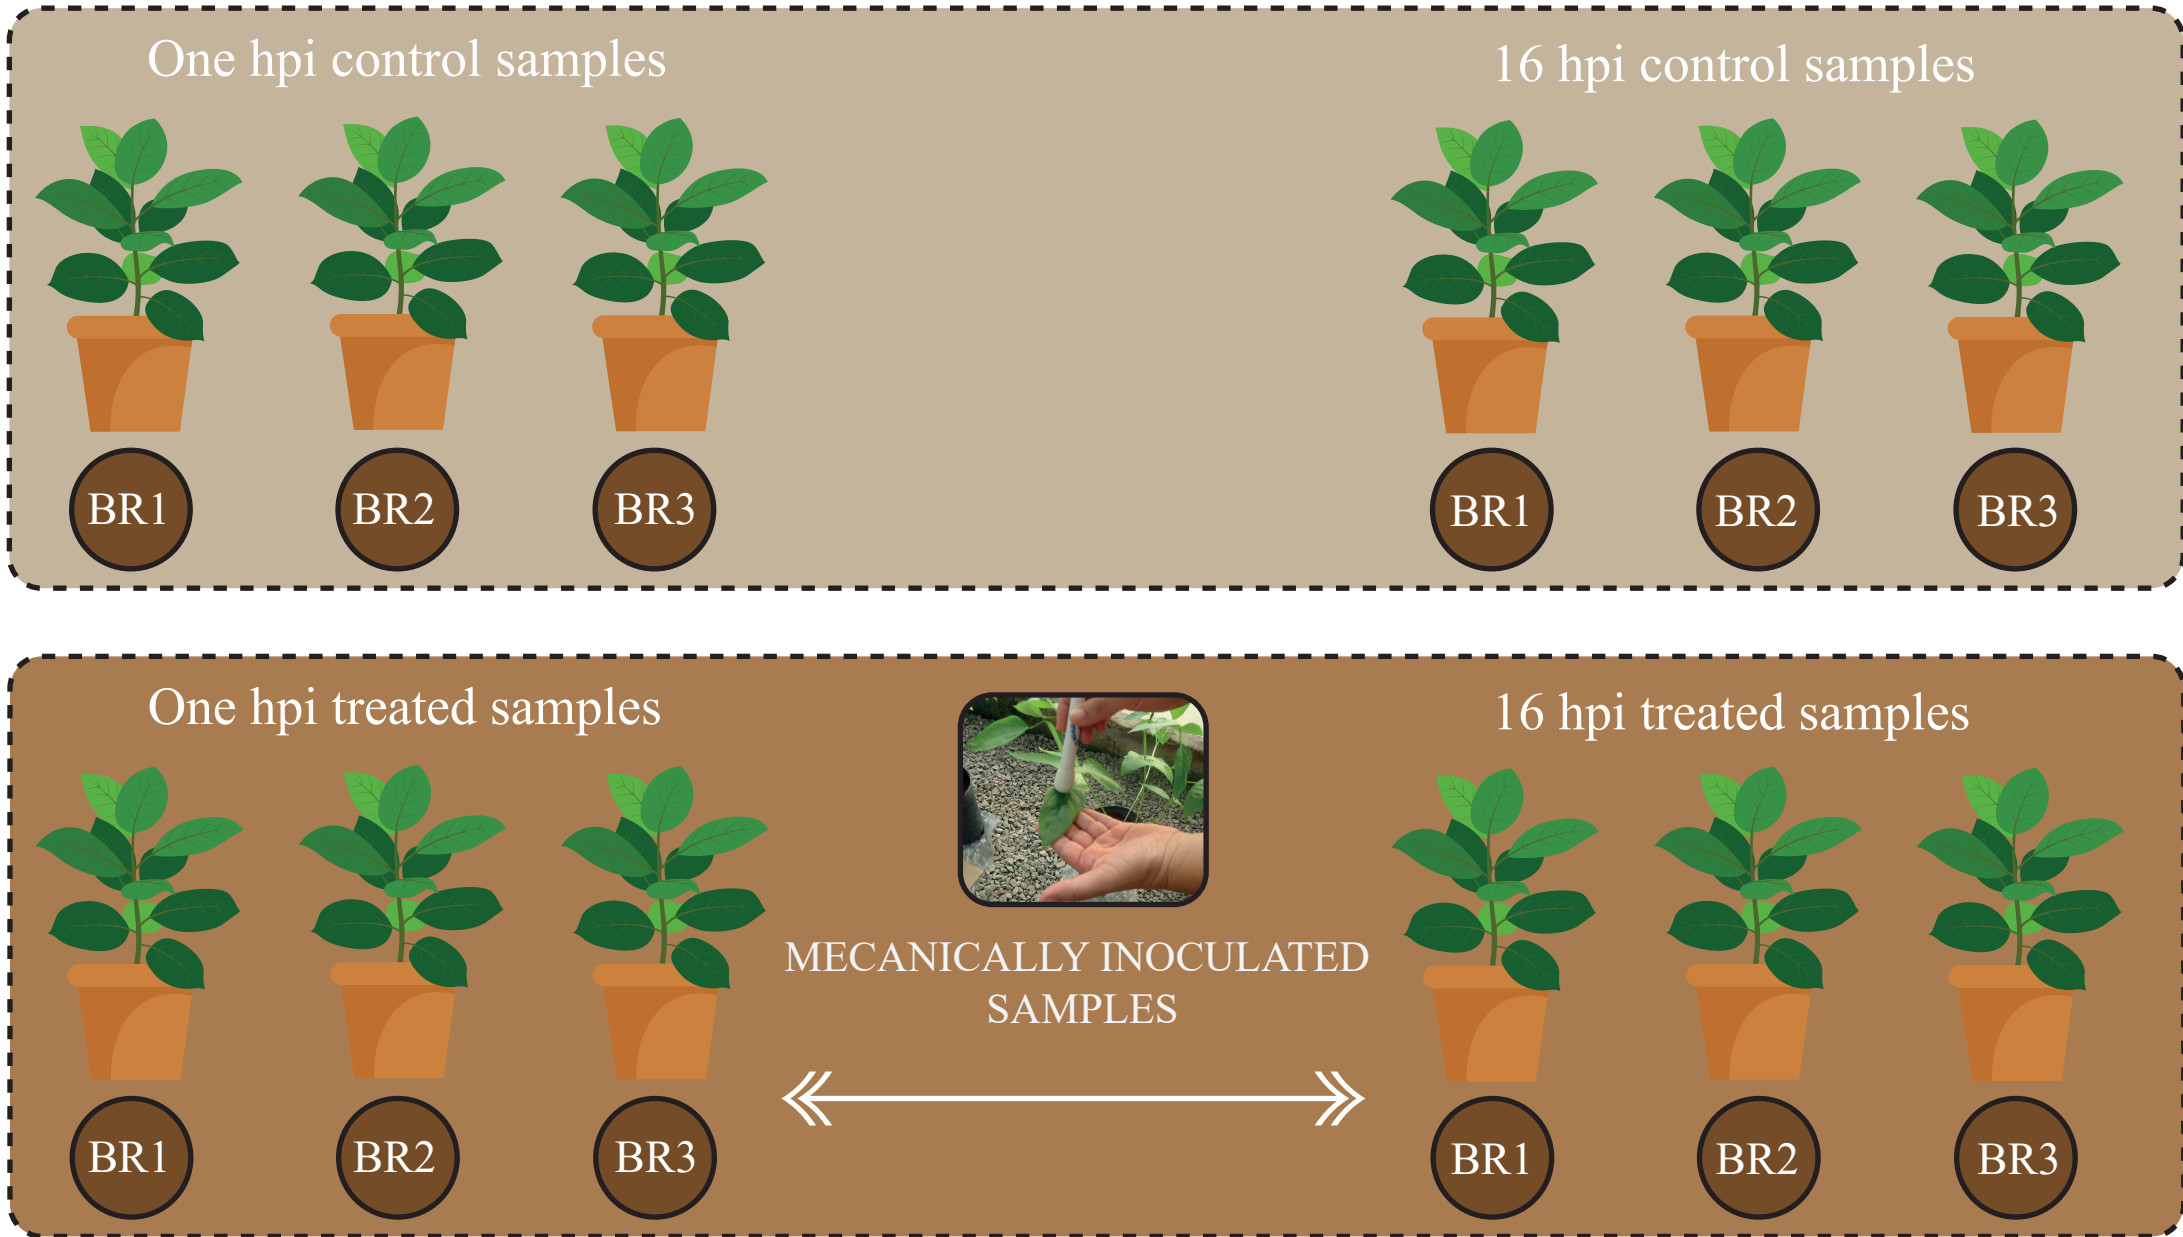

Supplement: s1 [file s1]
